# Supplementary material for: Changes in and Recognition of Electrochemical Fingerprints of Acer spp. in Different Seasons
Source: MDPI journal article supplement (doi:10.3390/bios12121114), 2022-12-02
Supplement: s1 [file s1]

Raw table S1. Electrochemical fingerprints of *Acer cinnamomifolium*

*Acer cinnamomifolium*

| Ethanol-ABS (Spring) |          |         |          |         | Ethanol-ABS (Summer) |         |         |         |          | Ethanol-ABS (Autumn) |         |         |         |         | Ethanol-ABS (Winter) |          |         |          |  |
|----------------------|----------|---------|----------|---------|----------------------|---------|---------|---------|----------|----------------------|---------|---------|---------|---------|----------------------|----------|---------|----------|--|
| 0.004                | 0.09873  | 0.12495 | 0.10505  | 0.12345 | 0.004                | 0.12305 | 0.23208 | 0.23352 | 0.08894  | 0.004                | 0.17971 | 0.14933 | 0.1348  | 0.13105 | 0.004                | 0.06832  | 0.11458 | 0.09425  |  |
| 0.008                | 0.09385  | 0.11903 | 0.09868  | 0.11761 | 0.008                | 0.117   | 0.22319 | 0.22436 | 0.08341  | 0.008                | 0.17116 | 0.14233 | 0.12747 | 0.12393 | 0.008                | 0.06392  | 0.10858 | 0.08918  |  |
| 0.012                | 0.08965  | 0.11414 | 0.09348  | 0.11274 | 0.012                | 0.11235 | 0.21639 | 0.21638 | 0.0788   | 0.012                | 0.16397 | 0.1362  | 0.12131 | 0.11748 | 0.012                | 0.06003  | 0.10405 | 0.08521  |  |
| 0.016                | 0.08589  | 0.10985 | 0.08876  | 0.10836 | 0.016                | 0.10863 | 0.21007 | 0.20869 | 0.07514  | 0.016                | 0.15756 | 0.13098 | 0.116   | 0.11206 | 0.016                | 0.0568   | 0.09994 | 0.08198  |  |
| 0.02                 | 0.08252  | 0.10618 | 0.08475  | 0.10471 | 0.02                 | 0.10491 | 0.20468 | 0.20219 | 0.07171  | 0.02                 | 0.15187 | 0.12614 | 0.11122 | 0.10742 | 0.02                 | 0.05398  | 0.09642 | 0.07924  |  |
| 0.024                | 0.07959  | 0.10291 | 0.08121  | 0.10082 | 0.024                | 0.10212 | 0.2     | 0.19598 | 0.06877  | 0.024                | 0.1466  | 0.12189 | 0.10698 | 0.10278 | 0.024                | 0.05133  | 0.09328 | 0.07671  |  |
| 0.028                | 0.07693  | 0.09985 | 0.07814  | 0.0979  | 0.028                | 0.09933 | 0.19555 | 0.19066 | 0.0661   | 0.028                | 0.14233 | 0.11807 | 0.10337 | 0.09875 | 0.028                | 0.04909  | 0.09077 | 0.07461  |  |
| 0.032                | 0.07448  | 0.0972  | 0.07507  | 0.09498 | 0.032                | 0.09677 | 0.19133 | 0.18534 | 0.06367  | 0.032                | 0.13806 | 0.11458 | 0.09981 | 0.09514 | 0.032                | 0.0469   | 0.08826 | 0.07258  |  |
| 0.036                | 0.07211  | 0.09455 | 0.07224  | 0.0923  | 0.036                | 0.09467 | 0.18735 | 0.18031 | 0.06152  | 0.036                | 0.134   | 0.11103 | 0.09625 | 0.09143 | 0.036                | 0.04491  | 0.08589 | 0.07091  |  |
| 0.04                 | 0.06995  | 0.0923  | 0.06917  | 0.08963 | 0.04                 | 0.09235 | 0.18384 | 0.17558 | 0.05942  | 0.04                 | 0.1303  | 0.10764 | 0.09317 | 0.08802 | 0.04                 | 0.04296  | 0.0839  | 0.06928  |  |
| 0.044                | 0.06794  | 0.08985 | 0.06704  | 0.08744 | 0.044                | 0.09025 | 0.18033 | 0.17085 | 0.05743  | 0.044                | 0.12666 | 0.1043  | 0.09015 | 0.08482 | 0.044                | 0.04126  | 0.08188 | 0.06754  |  |
| 0.048                | 0.06581  | 0.08761 | 0.06468  | 0.085   | 0.048                | 0.08816 | 0.17681 | 0.16642 | 0.05564  | 0.048                | 0.12289 | 0.10134 | 0.08728 | 0.08178 | 0.048                | 0.03956  | 0.07972 | 0.06584  |  |
| 0.052                | 0.06395  | 0.08557 | 0.06232  | 0.08281 | 0.052                | 0.08607 | 0.1733  | 0.16199 | 0.05372  | 0.052                | 0.11962 | 0.09828 | 0.08463 | 0.07889 | 0.052                | 0.03795  | 0.07777 | 0.06424  |  |
| 0.056                | 0.06202  | 0.08332 | 0.0602   | 0.08038 | 0.056                | 0.08421 | 0.16956 | 0.15755 | 0.05189  | 0.056                | 0.11598 | 0.09527 | 0.08176 | 0.07579 | 0.056                | 0.03633  | 0.07568 | 0.06241  |  |
| 0.06                 | 0.06025  | 0.08148 | 0.05807  | 0.07819 | 0.06                 | 0.08258 | 0.16651 | 0.15341 | 0.05034  | 0.06                 | 0.11307 | 0.09274 | 0.07953 | 0.07321 | 0.06                 | 0.03501  | 0.07411 | 0.06087  |  |
| 0.064                | 0.05853  | 0.07944 | 0.05619  | 0.076   | 0.064                | 0.08072 | 0.163   | 0.14898 | 0.04863  | 0.064                | 0.11    | 0.08956 | 0.07687 | 0.07058 | 0.064                | 0.03347  | 0.07223 | 0.05911  |  |
| 0.068                | 0.05664  | 0.0772  | 0.05406  | 0.07381 | 0.068                | 0.07862 | 0.15948 | 0.14455 | 0.047    | 0.068                | 0.1068  | 0.08677 | 0.07438 | 0.06779 | 0.068                | 0.03207  | 0.07024 | 0.05697  |  |
| 0.072                | 0.0549   | 0.07536 | 0.05217  | 0.07162 | 0.072                | 0.07676 | 0.15574 | 0.14011 | 0.04549  | 0.072                | 0.10374 | 0.08386 | 0.0721  | 0.06527 | 0.072                | 0.0307   | 0.06843 | 0.05517  |  |
| 0.076                | 0.05312  | 0.07332 | 0.05028  | 0.06943 | 0.076                | 0.0749  | 0.15246 | 0.13627 | 0.04386  | 0.076                | 0.10053 | 0.08112 | 0.0696  | 0.06279 | 0.076                | 0.02933  | 0.06658 | 0.05307  |  |
| 0.08                 | 0.05138  | 0.07128 | 0.04839  | 0.06748 | 0.08                 | 0.07304 | 0.14871 | 0.13184 | 0.0425   | 0.08                 | 0.09754 | 0.07848 | 0.06726 | 0.06031 | 0.08                 | 0.02809  | 0.06456 | 0.05087  |  |
| 0.084                | 0.04975  | 0.06944 | 0.04651  | 0.06529 | 0.084                | 0.07095 | 0.14496 | 0.1277  | 0.04091  | 0.084                | 0.09455 | 0.07552 | 0.06493 | 0.05789 | 0.084                | 0.02664  | 0.0626  | 0.04911  |  |
| 0.088                | 0.048    | 0.0674  | 0.04485  | 0.06334 | 0.088                | 0.06909 | 0.14122 | 0.12356 | 0.03948  | 0.088                | 0.09149 | 0.073   | 0.0627  | 0.05531 | 0.088                | 0.02548  | 0.06062 | 0.04687  |  |
| 0.092                | 0.04647  | 0.06557 | 0.0432   | 0.0614  | 0.092                | 0.06699 | 0.13747 | 0.11942 | 0.03805  | 0.092                | 0.08879 | 0.07015 | 0.06058 | 0.05309 | 0.092                | 0.02436  | 0.0586  | 0.04484  |  |
| 0.096                | 0.04472  | 0.06353 | 0.04155  | 0.05921 | 0.096                | 0.06513 | 0.13372 | 0.11528 | 0.03649  | 0.096                | 0.08572 | 0.06772 | 0.0584  | 0.05092 | 0.096                | 0.02312  | 0.05657 | 0.04264  |  |
| 0.1                  | 0.04295  | 0.06149 | 0.03966  | 0.05702 | 0.1                  | 0.06327 | 0.12951 | 0.11114 | 0.03498  | 0.1                  | 0.08259 | 0.06477 | 0.05601 | 0.0484  | 0.1                  | 0.022    | 0.05455 | 0.04044  |  |
| 0.104                | 0.04138  | 0.05945 | 0.03824  | 0.05531 | 0.104                | 0.06141 | 0.12553 | 0.1073  | 0.03363  | 0.104                | 0.07981 | 0.06235 | 0.05383 | 0.04623 | 0.104                | 0.02076  | 0.05253 | 0.03821  |  |
| 0.108                | 0.03969  | 0.0574  | 0.03636  | 0.05337 | 0.108                | 0.05932 | 0.12178 | 0.10287 | 0.03212  | 0.108                | 0.07668 | 0.05971 | 0.05176 | 0.04396 | 0.108                | 0.01964  | 0.05044 | 0.03597  |  |
| 0.112                | 0.03798  | 0.05536 | 0.03494  | 0.05142 | 0.112                | 0.05722 | 0.11756 | 0.09902 | 0.0308   | 0.112                | 0.07398 | 0.05707 | 0.04953 | 0.04174 | 0.112                | 0.0186   | 0.04838 | 0.03384  |  |
| 0.116                | 0.03632  | 0.05353 | 0.03329  | 0.04923 | 0.116                | 0.05513 | 0.11358 | 0.09459 | 0.02937  | 0.116                | 0.0712  | 0.05487 | 0.04741 | 0.03968 | 0.116                | 0.01744  | 0.04636 | 0.03177  |  |
| 0.12                 | 0.03463  | 0.05128 | 0.03163  | 0.04704 | 0.12                 | 0.05327 | 0.10937 | 0.09075 | 0.02794  | 0.12                 | 0.06821 | 0.05207 | 0.04518 | 0.03756 | 0.12                 | 0.01632  | 0.04423 | 0.02967  |  |
| 0.124                | 0.03295  | 0.04924 | 0.03022  | 0.04534 | 0.124                | 0.05141 | 0.10515 | 0.08661 | 0.0267   | 0.124                | 0.06529 | 0.05008 | 0.04332 | 0.0355  | 0.124                | 0.01533  | 0.04214 | 0.02754  |  |
| 0.128                | 0.03129  | 0.04741 | 0.02856  | 0.04339 | 0.128                | 0.04931 | 0.10117 | 0.08277 | 0.02535  | 0.128                | 0.06244 | 0.04739 | 0.0413  | 0.03343 | 0.128                | 0.01421  | 0.04019 | 0.0256   |  |
| 0.132                | 0.02964  | 0.04516 | 0.02668  | 0.04144 | 0.132                | 0.04699 | 0.09672 | 0.07863 | 0.024    | 0.132                | 0.05974 | 0.04502 | 0.03907 | 0.03132 | 0.132                | 0.0133   | 0.03817 | 0.0236   |  |
| 0.136                | 0.02792  | 0.04332 | 0.02526  | 0.0395  | 0.136                | 0.04489 | 0.09251 | 0.07449 | 0.02256  | 0.136                | 0.05689 | 0.04271 | 0.03716 | 0.02946 | 0.136                | 0.01226  | 0.03618 | 0.0218   |  |
| 0.14                 | 0.02641  | 0.04108 | 0.02361  | 0.03755 | 0.14                 | 0.04303 | 0.08829 | 0.07065 | 0.02133  | 0.14                 | 0.05433 | 0.04045 | 0.0353  | 0.0276  | 0.14                 | 0.01135  | 0.03413 | 0.02004  |  |
| 0.144                | 0.02473  | 0.03904 | 0.02195  | 0.0356  | 0.144                | 0.04071 | 0.08407 | 0.06651 | 0.02006  | 0.144                | 0.05141 | 0.03814 | 0.03318 | 0.02564 | 0.144                | 0.01048  | 0.03193 | 0.01824  |  |
| 0.148                | 0.02307  | 0.03679 | 0.0203   | 0.03366 | 0.148                | 0.03861 | 0.07986 | 0.06267 | 0.01874  | 0.148                | 0.04877 | 0.03561 | 0.03116 | 0.02378 | 0.148                | 0.00949  | 0.02998 | 0.01657  |  |
| 0.152                | 0.02133  | 0.03475 | 0.01865  | 0.03171 | 0.152                | 0.03652 | 0.07564 | 0.05853 | 0.01735  | 0.152                | 0.04592 | 0.03362 | 0.02931 | 0.02203 | 0.152                | 0.00866  | 0.02792 | 0.01494  |  |
| 0.156                | 0.0197   | 0.03251 | 0.01723  | 0.02976 | 0.156                | 0.03466 | 0.07143 | 0.05469 | 0.01616  | 0.156                | 0.04322 | 0.03147 | 0.02745 | 0.02028 | 0.156                | 0.00779  | 0.02597 | 0.0133   |  |
| 0.16                 | 0.01819  | 0.03047 | 0.01558  | 0.02757 | 0.16                 | 0.03233 | 0.06745 | 0.05084 | 0.01492  | 0.16                 | 0.04094 | 0.02937 | 0.02559 | 0.01857 | 0.16                 | 0.00708  | 0.02405 | 0.0119   |  |
| 0.164                | 0.01653  | 0.02822 | 0.01369  | 0.02562 | 0.164                | 0.03024 | 0.06323 | 0.047   | 0.01361  | 0.164                | 0.03823 | 0.02727 | 0.02373 | 0.01692 | 0.164                | 0.00609  | 0.02213 | 0.01047  |  |
| 0.168                | 0.01491  | 0.02598 | 0.01204  | 0.02368 | 0.168                | 0.02791 | 0.05902 | 0.04316 | 0.0123   | 0.168                | 0.03567 | 0.02512 | 0.02187 | 0.01522 | 0.168                | 0.00534  | 0.02011 | 0.009    |  |
| 0.172                | 0.0134   | 0.02394 | 0.01039  | 0.02173 | 0.172                | 0.02582 | 0.05054 | 0.03961 | 0.01114  | 0.172                | 0.03318 | 0.02313 | 0.02007 | 0.01362 | 0.172                | 0.00468  | 0.01827 | 0.00773  |  |
| 0.176                | 0.01183  | 0.0219  | 0.00873  | 0.01954 | 0.176                | 0.02373 | 0.05035 | 0.03577 | 0.00991  | 0.176                | 0.03062 | 0.02109 | 0.01837 | 0.01207 | 0.176                | 0.00394  | 0.01631 | 0.00647  |  |
| 0.18                 | 0.01023  | 0.01965 | 0.00755  | 0.01759 | 0.18                 | 0.02163 | 0.04637 | 0.03222 | 0.00872  | 0.18                 | 0.02827 | 0.01931 | 0.01651 | 0.01053 | 0.18                 | 0.00319  | 0.0144  | 0.00533  |  |
| 0.184                | 0.00878  | 0.01761 | 0.0059   | 0.01565 | 0.184                | 0.01931 | 0.04239 | 0.02867 | 0.00752  | 0.184                | 0.02592 | 0.01732 | 0.01471 | 0.00918 | 0.184                | 0.00257  | 0.01258 | 0.0043   |  |
| 0.188                | 0.00742  | 0.01557 | 0.00472  | 0.0137  | 0.188                | 0.01745 | 0.03841 | 0.02572 | 0.00637  | 0.188                | 0.02392 | 0.01555 | 0.01327 | 0.00764 | 0.188                | 0.00203  | 0.01088 | 0.0034   |  |
| 0.192                | 0.00606  | 0.01353 | 0.00331  | 0.012   | 0.192                | 0.01559 | 0.03443 | 0.02247 | 0.00533  | 0.192                | 0.02164 | 0.01409 | 0.01179 | 0.0064  | 0.192                | 0.00145  | 0.0092  | 0.00247  |  |
| 0.196                | 0.00476  | 0.01169 | 0.00212  | 0.01029 | 0.196                | 0.01349 | 0.03044 | 0.01921 | 0.00434  | 0.196                | 0.01944 | 0.01221 | 0.00998 | 0.00511 | 0.196                | 0.00108  | 0.00756 | 0.0016   |  |
| 0.2                  | 0.00373  | 0.00986 | 0.00118  | 0.00859 | 0.2                  | 0.01163 | 0.02693 | 0.01626 | 0.00342  | 0.2                  | 0.01744 | 0.0107  | 0.00855 | 0.00408 | 0.2                  | 6.63E-04 | 0.00607 | 0.001    |  |
| 0.204                | 0.00266  | 0.00802 | 4.72E-04 | 0.00689 | 0.204                | 0.01    | 0.02342 | 0.0136  | 0.00259  | 0.204                | 0.01545 | 0.00941 | 0.00722 | 0.00304 | 0.204                | 3.73E-04 | 0.00474 | 6.00E-04 |  |
| 0.208                | 0.00198  | 0.00639 | 2.36E-04 | 0.00555 | 0.208                | 0.00814 | 0.02014 | 0.01123 | 0.00187  | 0.208                | 0.0136  | 0.00785 | 0.006   | 0.00212 | 0.208                | 2.07E-04 | 0.00356 | 3.00E-04 |  |
| 0.212                | 0.00112  | 0.00496 | 0        | 0.00416 | 0.212                | 0.00675 | 0.01686 | 0.00857 | 0.00107  | 0.212                | 0.01182 | 0.00662 | 0.00462 | 0.00139 | 0.212                | 8.29E-05 | 0.00237 | 0        |  |
| 0.216                | 5.03E-04 | 0.00353 | 2.36E-04 | 0.00297 | 0.216                | 0.00512 | 0.01382 | 0.0068  | 5.97E-04 |                      |         |         |         |         |                      |          |         |          |  |

|       |         |         |         |         |       |         |         |         |         |       |         |         |         |         |       |         |         |         |
|-------|---------|---------|---------|---------|-------|---------|---------|---------|---------|-------|---------|---------|---------|---------|-------|---------|---------|---------|
| 0.36  | 0.08915 | 0.08618 | 0.23796 | 0.19986 | 0.36  | 0.07886 | 0.07049 | 0.11351 | 0.07454 | 0.36  | 0.02777 | 0.06089 | 0.06095 | 0.06067 | 0.36  | 0.09106 | 0.08028 | 0.11221 |
| 0.364 | 0.09453 | 0.09026 | 0.25189 | 0.21909 | 0.364 | 0.08653 | 0.07822 | 0.12563 | 0.07645 | 0.364 | 0.03161 | 0.06762 | 0.06525 | 0.06527 | 0.364 | 0.09288 | 0.0838  | 0.11622 |
| 0.368 | 0.10006 | 0.09475 | 0.26653 | 0.23734 | 0.368 | 0.09467 | 0.08595 | 0.13804 | 0.07832 | 0.368 | 0.03588 | 0.07407 | 0.07003 | 0.07068 | 0.368 | 0.09558 | 0.08802 | 0.12055 |
| 0.372 | 0.10568 | 0.09965 | 0.28163 | 0.25437 | 0.372 | 0.10305 | 0.09438 | 0.15046 | 0.08023 | 0.372 | 0.04087 | 0.08123 | 0.07555 | 0.07682 | 0.372 | 0.09926 | 0.09213 | 0.12555 |
| 0.376 | 0.11113 | 0.10475 | 0.29674 | 0.26922 | 0.376 | 0.11165 | 0.10304 | 0.16317 | 0.0825  | 0.376 | 0.04635 | 0.08903 | 0.0816  | 0.08379 | 0.376 | 0.10378 | 0.09677 | 0.13022 |
| 0.38  | 0.11653 | 0.10965 | 0.31161 | 0.28212 | 0.38  | 0.11198 | 0.11194 | 0.17588 | 0.08496 | 0.38  | 0.05247 | 0.09726 | 0.08824 | 0.09137 | 0.38  | 0.10925 | 0.10147 | 0.13522 |
| 0.384 | 0.12156 | 0.11454 | 0.32578 | 0.29161 | 0.384 | 0.1277  | 0.12014 | 0.18829 | 0.08759 | 0.384 | 0.05917 | 0.10613 | 0.09551 | 0.09927 | 0.384 | 0.11488 | 0.10628 | 0.13989 |
| 0.388 | 0.1257  | 0.11903 | 0.33876 | 0.29745 | 0.388 | 0.13468 | 0.12787 | 0.19982 | 0.09022 | 0.388 | 0.06629 | 0.11544 | 0.10321 | 0.10778 | 0.388 | 0.12081 | 0.11109 | 0.14422 |
| 0.392 | 0.12955 | 0.12291 | 0.3508  | 0.29988 | 0.392 | 0.14096 | 0.13466 | 0.21106 | 0.0932  | 0.392 | 0.07412 | 0.12528 | 0.11144 | 0.11686 | 0.392 | 0.12706 | 0.11601 | 0.14789 |
| 0.396 | 0.13251 | 0.12618 | 0.36143 | 0.29818 | 0.396 | 0.14585 | 0.14052 | 0.2214  | 0.09647 | 0.396 | 0.08259 | 0.13561 | 0.1202  | 0.12615 | 0.396 | 0.1334  | 0.12089 | 0.15122 |
| 0.4   | 0.13458 | 0.12862 | 0.3704  | 0.29355 | 0.4   | 0.14934 | 0.14496 | 0.23056 | 0.09981 | 0.4   | 0.09171 | 0.14669 | 0.12954 | 0.13616 | 0.4   | 0.13966 | 0.1257  | 0.15355 |
| 0.404 | 0.13605 | 0.13046 | 0.37771 | 0.28528 | 0.404 | 0.1512  | 0.14778 | 0.23855 | 0.10351 | 0.404 | 0.10132 | 0.15804 | 0.13973 | 0.14632 | 0.404 | 0.14604 | 0.13037 | 0.15522 |
| 0.408 | 0.13694 | 0.13128 | 0.38362 | 0.27506 | 0.408 | 0.15143 | 0.14871 | 0.24534 | 0.10745 | 0.408 | 0.11178 | 0.17015 | 0.15051 | 0.15695 | 0.408 | 0.15266 | 0.13483 | 0.15622 |
| 0.412 | 0.13753 | 0.13169 | 0.3881  | 0.26289 | 0.412 | 0.1505  | 0.14871 | 0.25126 | 0.11163 | 0.412 | 0.12289 | 0.18273 | 0.16192 | 0.16809 | 0.412 | 0.15913 | 0.13936 | 0.15655 |
| 0.416 | 0.13753 | 0.13128 | 0.39117 | 0.24951 | 0.416 | 0.14817 | 0.14684 | 0.25599 | 0.11593 | 0.416 | 0.13457 | 0.19521 | 0.17366 | 0.17939 | 0.416 | 0.16576 | 0.14354 | 0.15589 |
| 0.42  | 0.13753 | 0.13087 | 0.39353 | 0.23564 | 0.42  | 0.14468 | 0.14379 | 0.26012 | 0.12038 | 0.42  | 0.14674 | 0.20775 | 0.18587 | 0.19095 | 0.42  | 0.17243 | 0.14773 | 0.15489 |
| 0.424 | 0.13724 | 0.13005 | 0.39566 | 0.22225 | 0.424 | 0.14073 | 0.14028 | 0.26367 | 0.12504 | 0.424 | 0.15956 | 0.22017 | 0.19829 | 0.20266 | 0.424 | 0.17955 | 0.15191 | 0.15422 |
| 0.428 | 0.13724 | 0.12924 | 0.39754 | 0.20984 | 0.428 | 0.13608 | 0.1356  | 0.26663 | 0.12954 | 0.428 | 0.17266 | 0.23238 | 0.21077 | 0.21386 | 0.428 | 0.18647 | 0.15574 | 0.15289 |
| 0.432 | 0.13694 | 0.12862 | 0.39943 | 0.19816 | 0.432 | 0.13119 | 0.13068 | 0.26929 | 0.13419 | 0.432 | 0.1859  | 0.24373 | 0.22308 | 0.22444 | 0.432 | 0.19368 | 0.15888 | 0.15122 |
| 0.436 | 0.13694 | 0.12781 | 0.40109 | 0.1877  | 0.436 | 0.12584 | 0.12553 | 0.27165 | 0.13841 | 0.436 | 0.19858 | 0.25444 | 0.23455 | 0.23424 | 0.436 | 0.20043 | 0.16237 | 0.14989 |
| 0.44  | 0.13694 | 0.1272  | 0.40321 | 0.17845 | 0.44  | 0.12073 | 0.12061 | 0.27402 | 0.14263 | 0.44  | 0.21118 | 0.26401 | 0.24575 | 0.24306 | 0.44  | 0.20723 | 0.16516 | 0.14855 |
| 0.444 | 0.13753 | 0.1272  | 0.40628 | 0.17091 | 0.444 | 0.11607 | 0.11593 | 0.27727 | 0.14665 | 0.444 | 0.22342 | 0.27278 | 0.25605 | 0.25059 | 0.444 | 0.21348 | 0.16829 | 0.14789 |
| 0.448 | 0.13783 | 0.1272  | 0.41029 | 0.16458 | 0.448 | 0.11165 | 0.11171 | 0.28052 | 0.15043 | 0.448 | 0.23453 | 0.2809  | 0.2655  | 0.25694 | 0.448 | 0.21936 | 0.17108 | 0.14722 |
| 0.452 | 0.13872 | 0.12781 | 0.41478 | 0.15947 | 0.452 | 0.10747 | 0.10796 | 0.28407 | 0.15401 | 0.452 | 0.2445  | 0.28784 | 0.2741  | 0.26215 | 0.452 | 0.22434 | 0.17387 | 0.14689 |
| 0.456 | 0.1396  | 0.12862 | 0.42044 | 0.15606 | 0.456 | 0.10398 | 0.10515 | 0.2885  | 0.15775 | 0.456 | 0.25397 | 0.29462 | 0.28196 | 0.26654 | 0.456 | 0.22898 | 0.17631 | 0.14689 |
| 0.46  | 0.14108 | 0.13005 | 0.42682 | 0.15387 | 0.46  | 0.10119 | 0.10281 | 0.29353 | 0.16129 | 0.46  | 0.26223 | 0.3007  | 0.28918 | 0.27046 | 0.46  | 0.23308 | 0.17875 | 0.14755 |
| 0.464 | 0.14256 | 0.13169 | 0.4339  | 0.15241 | 0.464 | 0.09863 | 0.10141 | 0.29914 | 0.165   | 0.464 | 0.26978 | 0.30608 | 0.29592 | 0.27355 | 0.464 | 0.23672 | 0.18154 | 0.14789 |
| 0.468 | 0.14463 | 0.13413 | 0.44216 | 0.15217 | 0.468 | 0.09723 | 0.10007 | 0.30535 | 0.16866 | 0.468 | 0.27604 | 0.31092 | 0.30235 | 0.27716 | 0.468 | 0.24004 | 0.18433 | 0.14922 |
| 0.472 | 0.1467  | 0.13679 | 0.45042 | 0.15265 | 0.472 | 0.09607 | 0.10094 | 0.31156 | 0.1724  | 0.472 | 0.28124 | 0.31522 | 0.30835 | 0.28026 | 0.472 | 0.2429  | 0.18677 | 0.15055 |
| 0.476 | 0.14966 | 0.13985 | 0.4594  | 0.15411 | 0.476 | 0.09537 | 0.10141 | 0.31836 | 0.17626 | 0.476 | 0.28572 | 0.31899 | 0.31408 | 0.28387 | 0.476 | 0.24571 | 0.18956 | 0.15222 |
| 0.48  | 0.15262 | 0.14311 | 0.46931 | 0.15606 | 0.48  | 0.09514 | 0.10281 | 0.32545 | 0.18    | 0.48  | 0.28985 | 0.32222 | 0.31992 | 0.28748 | 0.48  | 0.24845 | 0.19235 | 0.15389 |
| 0.484 | 0.15587 | 0.14638 | 0.47946 | 0.15849 | 0.484 | 0.09537 | 0.10445 | 0.33195 | 0.1837  | 0.484 | 0.29263 | 0.32544 | 0.32523 | 0.29058 | 0.484 | 0.25093 | 0.19479 | 0.15589 |
| 0.488 | 0.15942 | 0.14985 | 0.49008 | 0.16141 | 0.488 | 0.09607 | 0.10703 | 0.33905 | 0.1876  | 0.488 | 0.29491 | 0.3276  | 0.33054 | 0.29419 | 0.488 | 0.25354 | 0.19792 | 0.15822 |
| 0.492 | 0.16327 | 0.15373 | 0.50142 | 0.16433 | 0.492 | 0.09723 | 0.10984 | 0.34614 | 0.19146 | 0.492 | 0.29626 | 0.32921 | 0.33532 | 0.2978  | 0.492 | 0.25636 | 0.20036 | 0.16055 |
| 0.496 | 0.16711 | 0.1576  | 0.51251 | 0.1675  | 0.496 | 0.09839 | 0.11265 | 0.35265 | 0.19524 | 0.496 | 0.29712 | 0.33082 | 0.34062 | 0.30141 | 0.496 | 0.2588  | 0.20315 | 0.16322 |
| 0.5   | 0.17155 | 0.16148 | 0.52384 | 0.17091 | 0.5   | 0.10002 | 0.11593 | 0.35885 | 0.19882 | 0.5   | 0.29733 | 0.33244 | 0.3454  | 0.30451 | 0.5   | 0.26129 | 0.20594 | 0.16589 |
| 0.504 | 0.17598 | 0.16536 | 0.53588 | 0.17431 | 0.504 | 0.10165 | 0.11967 | 0.36506 | 0.2024  | 0.504 | 0.29676 | 0.33297 | 0.34965 | 0.3076  | 0.504 | 0.26365 | 0.20908 | 0.16889 |
| 0.508 | 0.18072 | 0.16944 | 0.54839 | 0.17796 | 0.508 | 0.10375 | 0.12342 | 0.37097 | 0.2061  | 0.508 | 0.29605 | 0.33405 | 0.35496 | 0.3107  | 0.508 | 0.26614 | 0.21187 | 0.17189 |
| 0.512 | 0.18545 | 0.17352 | 0.56114 | 0.18137 | 0.512 | 0.10607 | 0.1274  | 0.37718 | 0.20969 | 0.512 | 0.29477 | 0.33513 | 0.35921 | 0.3138  | 0.512 | 0.26854 | 0.215   | 0.17522 |
| 0.516 | 0.19018 | 0.1774  | 0.57342 | 0.18502 | 0.516 | 0.10816 | 0.13068 | 0.38191 | 0.21299 | 0.516 | 0.29341 | 0.33566 | 0.36345 | 0.31689 | 0.516 | 0.27044 | 0.21779 | 0.17822 |
| 0.52  | 0.19521 | 0.18168 | 0.58687 | 0.18843 | 0.52  | 0.11072 | 0.13466 | 0.38723 | 0.21645 | 0.52  | 0.29199 | 0.33728 | 0.36823 | 0.31999 | 0.52  | 0.27293 | 0.22093 | 0.18189 |
| 0.524 | 0.20024 | 0.18556 | 0.60009 | 0.19208 | 0.524 | 0.11351 | 0.13817 | 0.39196 | 0.22007 | 0.524 | 0.29035 | 0.33889 | 0.37354 | 0.3236  | 0.524 | 0.27583 | 0.22407 | 0.18556 |
| 0.528 | 0.20526 | 0.18985 | 0.61308 | 0.19548 | 0.528 | 0.11631 | 0.14192 | 0.39669 | 0.22354 | 0.528 | 0.289   | 0.34051 | 0.37832 | 0.32721 | 0.528 | 0.27873 | 0.2272  | 0.18956 |
| 0.532 | 0.21029 | 0.19393 | 0.62606 | 0.19889 | 0.532 | 0.11191 | 0.14543 | 0.40083 | 0.22692 | 0.532 | 0.28779 | 0.34266 | 0.38363 | 0.33134 | 0.532 | 0.28122 | 0.23069 | 0.19356 |
| 0.536 | 0.21591 | 0.19801 | 0.63905 | 0.20205 | 0.536 | 0.12189 | 0.14871 | 0.40526 | 0.23038 | 0.536 | 0.28693 | 0.34481 | 0.38947 | 0.33547 | 0.536 | 0.28412 | 0.23452 | 0.19756 |
| 0.54  | 0.22124 | 0.20229 | 0.65227 | 0.20546 | 0.54  | 0.12491 | 0.15222 | 0.4094  | 0.23432 | 0.54  | 0.28672 | 0.34804 | 0.39531 | 0.34063 | 0.54  | 0.28702 | 0.23836 | 0.20189 |
| 0.544 | 0.22686 | 0.20658 | 0.66501 | 0.20862 | 0.544 | 0.12817 | 0.1555  | 0.41383 | 0.2379  | 0.544 | 0.28686 | 0.35126 | 0.40168 | 0.3463  | 0.544 | 0.29033 | 0.24254 | 0.20623 |
| 0.548 | 0.23248 | 0.21086 | 0.67682 | 0.21154 | 0.548 | 0.13119 | 0.15878 | 0.41738 | 0.24188 | 0.548 | 0.28693 | 0.35503 | 0.40805 | 0.35198 | 0.548 | 0.29323 | 0.24637 | 0.21023 |
| 0.552 | 0.23839 | 0.21515 | 0.68862 | 0.21471 | 0.552 | 0.13445 | 0.16206 | 0.42152 | 0.24586 | 0.552 | 0.28779 | 0.35933 | 0.41495 | 0.35817 | 0.552 | 0.29696 | 0.25056 | 0.21456 |
| 0.556 | 0.24431 | 0.21964 | 0.69972 | 0.21787 | 0.556 | 0.13771 | 0.16511 | 0.42595 | 0.24984 | 0.556 | 0.28921 | 0.36364 | 0.42291 | 0.36487 | 0.556 | 0.30027 | 0.25474 | 0.21923 |
| 0.56  | 0.25022 | 0.22393 | 0.70963 | 0.22128 | 0.56  | 0.14073 | 0.16838 | 0.4298  | 0.25422 | 0.56  | 0.29078 | 0.36848 | 0.43035 | 0.3721  | 0.56  | 0.304   | 0.25892 | 0.22323 |
| 0.564 | 0.25584 | 0.22801 | 0.71931 | 0.2242  | 0.564 | 0.14399 | 0.17119 | 0.43393 | 0.2586  | 0.564 | 0.29292 | 0.37386 | 0.43778 | 0.37932 | 0.564 | 0.30814 | 0.26346 | 0.22756 |
| 0.568 | 0.26176 | 0.23229 | 0.72828 | 0.22736 | 0.568 | 0.14748 | 0.174   | 0.43807 | 0.26297 | 0.568 | 0.29527 | 0.37924 | 0.44574 | 0.38706 | 0.568 | 0.31187 | 0.26799 | 0.23156 |
| 0.572 | 0.26738 | 0.23678 | 0.73702 | 0.23101 | 0.572 | 0.15073 | 0.17728 | 0.4431  | 0.26815 | 0.572 | 0.29833 | 0.38515 | 0.45371 | 0.39583 | 0.572 | 0.31643 | 0.27287 | 0.2359  |
| 0.576 | 0.27329 | 0.24127 | 0.74504 | 0.23418 | 0.576 | 0.15399 | 0.17986 | 0.44783 | 0.27292 | 0.576 | 0.30153 | 0.39053 | 0.46167 | 0.40409 | 0.576 | 0.32057 | 0.27775 | 0.2399  |
| 0.58  | 0.27862 | 0.24535 | 0.75165 | 0.23758 | 0.58  | 0.15701 | 0.18267 | 0.45226 | 0.2777  | 0.58  | 0.30452 | 0.39645 | 0.4691  | 0.      |       |         |         |         |

|       |         |         |         |         |       |         |         |         |         |       |         |         |         |         |       |         |         |         |
|-------|---------|---------|---------|---------|-------|---------|---------|---------|---------|-------|---------|---------|---------|---------|-------|---------|---------|---------|
| 0.736 | 0.34014 | 0.2729  | 0.74079 | 0.28893 | 0.736 | 0.22936 | 0.24005 | 0.44635 | 0.33898 | 0.736 | 0.29455 | 0.4142  | 0.46379 | 0.46755 | 0.736 | 0.32016 | 0.31504 | 0.32124 |
| 0.74  | 0.33925 | 0.27127 | 0.73584 | 0.28917 | 0.74  | 0.23052 | 0.23911 | 0.44103 | 0.3366  | 0.74  | 0.29142 | 0.41151 | 0.45795 | 0.46342 | 0.74  | 0.3185  | 0.31295 | 0.32224 |
| 0.744 | 0.33836 | 0.27004 | 0.73111 | 0.28917 | 0.744 | 0.23168 | 0.23841 | 0.436   | 0.33461 | 0.744 | 0.28907 | 0.40936 | 0.45264 | 0.45981 | 0.744 | 0.31726 | 0.31121 | 0.32424 |
| 0.748 | 0.33747 | 0.26902 | 0.72663 | 0.28966 | 0.748 | 0.23308 | 0.23747 | 0.43127 | 0.33301 | 0.748 | 0.28693 | 0.40721 | 0.4484  | 0.45723 | 0.748 | 0.31643 | 0.30947 | 0.32558 |
| 0.752 | 0.33688 | 0.2678  | 0.72144 | 0.28966 | 0.752 | 0.23424 | 0.23653 | 0.42625 | 0.33142 | 0.752 | 0.28487 | 0.40559 | 0.44362 | 0.45413 | 0.752 | 0.3156  | 0.30772 | 0.32658 |
| 0.756 | 0.336   | 0.26658 | 0.71601 | 0.28966 | 0.756 | 0.2354  | 0.23536 | 0.42152 | 0.32943 | 0.756 | 0.28288 | 0.40398 | 0.43937 | 0.45155 | 0.756 | 0.31519 | 0.30633 | 0.32758 |
| 0.76  | 0.3354  | 0.26556 | 0.71081 | 0.28966 | 0.76  | 0.23633 | 0.23443 | 0.41679 | 0.32784 | 0.76  | 0.2811  | 0.40237 | 0.43512 | 0.44949 | 0.76  | 0.31477 | 0.30494 | 0.32858 |
| 0.764 | 0.33481 | 0.26474 | 0.70515 | 0.29015 | 0.764 | 0.2375  | 0.23326 | 0.41236 | 0.32665 | 0.764 | 0.27953 | 0.40129 | 0.43194 | 0.44794 | 0.764 | 0.31477 | 0.30389 | 0.32991 |
| 0.768 | 0.33422 | 0.26392 | 0.69948 | 0.29015 | 0.768 | 0.23866 | 0.23208 | 0.40792 | 0.32545 | 0.768 | 0.27846 | 0.40075 | 0.42875 | 0.44639 | 0.768 | 0.31477 | 0.30284 | 0.33058 |
| 0.772 | 0.33333 | 0.2629  | 0.69311 | 0.29015 | 0.772 | 0.23936 | 0.23044 | 0.40319 | 0.32426 | 0.772 | 0.27732 | 0.40022 | 0.42557 | 0.44485 | 0.772 | 0.31477 | 0.30145 | 0.33124 |
| 0.776 | 0.33333 | 0.26249 | 0.68815 | 0.29112 | 0.776 | 0.24099 | 0.22974 | 0.39994 | 0.32426 | 0.776 | 0.27711 | 0.40075 | 0.42344 | 0.44485 | 0.776 | 0.3156  | 0.3011  | 0.33258 |
| 0.78  | 0.33274 | 0.26168 | 0.68178 | 0.29112 | 0.78  | 0.24168 | 0.22857 | 0.3958  | 0.32307 | 0.78  | 0.27654 | 0.40075 | 0.42185 | 0.44485 | 0.78  | 0.31643 | 0.30075 | 0.33291 |
| 0.784 | 0.33215 | 0.26086 | 0.6754  | 0.29161 | 0.784 | 0.24261 | 0.22693 | 0.39196 | 0.32267 | 0.784 | 0.27618 | 0.40129 | 0.41973 | 0.44433 | 0.784 | 0.31684 | 0.30006 | 0.33358 |
| 0.788 | 0.33156 | 0.26025 | 0.66879 | 0.29161 | 0.788 | 0.24355 | 0.22576 | 0.38812 | 0.32227 | 0.788 | 0.2759  | 0.40129 | 0.41814 | 0.44485 | 0.788 | 0.31767 | 0.29936 | 0.33391 |
| 0.792 | 0.33097 | 0.25923 | 0.66242 | 0.29185 | 0.792 | 0.24448 | 0.22412 | 0.38427 | 0.32147 | 0.792 | 0.27576 | 0.40183 | 0.41654 | 0.44536 | 0.792 | 0.31892 | 0.29866 | 0.33424 |
| 0.796 | 0.33038 | 0.25862 | 0.65604 | 0.29258 | 0.796 | 0.24517 | 0.22319 | 0.38102 | 0.32147 | 0.796 | 0.27611 | 0.4029  | 0.41601 | 0.44639 | 0.796 | 0.31974 | 0.29866 | 0.33458 |
| 0.8   | 0.32978 | 0.258   | 0.64967 | 0.29307 | 0.8   | 0.2461  | 0.22201 | 0.37777 | 0.32187 | 0.8   | 0.27654 | 0.40398 | 0.41495 | 0.44743 | 0.8   | 0.32099 | 0.29831 | 0.33491 |
| 0.804 | 0.3289  | 0.25719 | 0.64306 | 0.2938  | 0.804 | 0.24703 | 0.22084 | 0.37422 | 0.32187 | 0.804 | 0.27682 | 0.40506 | 0.41442 | 0.44846 | 0.804 | 0.32223 | 0.29796 | 0.33491 |
| 0.808 | 0.32831 | 0.25637 | 0.63669 | 0.29428 | 0.808 | 0.24796 | 0.21991 | 0.37127 | 0.32187 | 0.808 | 0.27782 | 0.40667 | 0.41442 | 0.45001 | 0.808 | 0.32347 | 0.29796 | 0.33524 |
| 0.812 | 0.32742 | 0.25576 | 0.63078 | 0.29526 | 0.812 | 0.2489  | 0.21897 | 0.36861 | 0.32227 | 0.812 | 0.27875 | 0.40775 | 0.41442 | 0.45155 | 0.812 | 0.32472 | 0.29831 | 0.33558 |
| 0.816 | 0.32683 | 0.25494 | 0.62465 | 0.29623 | 0.816 | 0.24983 | 0.21827 | 0.36624 | 0.32307 | 0.816 | 0.27989 | 0.40936 | 0.41442 | 0.45362 | 0.816 | 0.32637 | 0.29831 | 0.33524 |
| 0.82  | 0.32594 | 0.25433 | 0.61851 | 0.29672 | 0.82  | 0.25076 | 0.21756 | 0.36329 | 0.32346 | 0.82  | 0.28067 | 0.41097 | 0.41495 | 0.45516 | 0.82  | 0.32762 | 0.29831 | 0.33524 |
| 0.824 | 0.32476 | 0.25331 | 0.61213 | 0.29745 | 0.824 | 0.25122 | 0.21639 | 0.36063 | 0.32386 | 0.824 | 0.28152 | 0.41205 | 0.41495 | 0.45671 | 0.824 | 0.32886 | 0.29831 | 0.33491 |
| 0.828 | 0.32387 | 0.2527  | 0.60694 | 0.29866 | 0.828 | 0.25238 | 0.21616 | 0.35856 | 0.32506 | 0.828 | 0.28302 | 0.4142  | 0.41548 | 0.45878 | 0.828 | 0.33052 | 0.29866 | 0.33491 |
| 0.832 | 0.32298 | 0.25188 | 0.60127 | 0.29988 | 0.832 | 0.25331 | 0.21569 | 0.35678 | 0.32585 | 0.832 | 0.28423 | 0.41528 | 0.41654 | 0.46084 | 0.832 | 0.33176 | 0.29866 | 0.33491 |
| 0.836 | 0.32209 | 0.25107 | 0.59585 | 0.3011  | 0.836 | 0.25425 | 0.21546 | 0.35501 | 0.32705 | 0.836 | 0.2853  | 0.41743 | 0.41707 | 0.4629  | 0.836 | 0.33342 | 0.29901 | 0.33424 |
| 0.84  | 0.32121 | 0.25045 | 0.59089 | 0.30256 | 0.84  | 0.25541 | 0.21546 | 0.35353 | 0.32824 | 0.84  | 0.28672 | 0.41904 | 0.41814 | 0.46497 | 0.84  | 0.33466 | 0.29936 | 0.33458 |
| 0.844 | 0.32062 | 0.25005 | 0.58617 | 0.30402 | 0.844 | 0.2568  | 0.21546 | 0.35235 | 0.32943 | 0.844 | 0.28815 | 0.42119 | 0.4192  | 0.46703 | 0.844 | 0.33632 | 0.30006 | 0.33424 |
| 0.848 | 0.31973 | 0.24943 | 0.58121 | 0.30548 | 0.848 | 0.25773 | 0.21546 | 0.35176 | 0.33063 | 0.848 | 0.28964 | 0.42281 | 0.42079 | 0.46961 | 0.848 | 0.33756 | 0.3004  | 0.33391 |
| 0.852 | 0.31884 | 0.24882 | 0.57649 | 0.30694 | 0.852 | 0.2589  | 0.21593 | 0.35087 | 0.33222 | 0.852 | 0.29085 | 0.42442 | 0.42185 | 0.47167 | 0.852 | 0.33922 | 0.3011  | 0.33358 |
| 0.856 | 0.31825 | 0.24841 | 0.57224 | 0.30888 | 0.856 | 0.26029 | 0.21616 | 0.35028 | 0.33381 | 0.856 | 0.29242 | 0.42657 | 0.42344 | 0.47374 | 0.856 | 0.34046 | 0.3018  | 0.33358 |
| 0.86  | 0.31766 | 0.24821 | 0.56799 | 0.31059 | 0.86  | 0.26192 | 0.21663 | 0.35028 | 0.3354  | 0.86  | 0.29405 | 0.42819 | 0.42504 | 0.4758  | 0.86  | 0.3417  | 0.3025  | 0.33358 |
| 0.864 | 0.31707 | 0.24801 | 0.56398 | 0.31253 | 0.864 | 0.26332 | 0.21756 | 0.35058 | 0.33699 | 0.864 | 0.29583 | 0.43034 | 0.42663 | 0.47838 | 0.864 | 0.34377 | 0.30354 | 0.33358 |
| 0.868 | 0.31647 | 0.2476  | 0.55996 | 0.31424 | 0.868 | 0.26495 | 0.21827 | 0.35058 | 0.33898 | 0.868 | 0.29726 | 0.43195 | 0.42769 | 0.48045 | 0.868 | 0.34502 | 0.30424 | 0.33324 |
| 0.872 | 0.31618 | 0.2476  | 0.55642 | 0.31667 | 0.872 | 0.26681 | 0.2192  | 0.35117 | 0.34097 | 0.872 | 0.29904 | 0.4341  | 0.42982 | 0.48251 | 0.872 | 0.34667 | 0.30528 | 0.33358 |
| 0.876 | 0.31618 | 0.2478  | 0.55312 | 0.31911 | 0.876 | 0.26867 | 0.22061 | 0.35235 | 0.34296 | 0.876 | 0.30117 | 0.43679 | 0.43194 | 0.48561 | 0.876 | 0.34833 | 0.30668 | 0.33391 |
| 0.88  | 0.31588 | 0.2478  | 0.54981 | 0.3213  | 0.88  | 0.27053 | 0.22201 | 0.35353 | 0.34495 | 0.88  | 0.30274 | 0.43895 | 0.43406 | 0.48767 | 0.88  | 0.34999 | 0.30772 | 0.33391 |
| 0.884 | 0.31559 | 0.24801 | 0.54651 | 0.32349 | 0.884 | 0.27239 | 0.22319 | 0.35442 | 0.34734 | 0.884 | 0.30466 | 0.44164 | 0.43566 | 0.49025 | 0.884 | 0.35123 | 0.30912 | 0.33391 |
| 0.888 | 0.31588 | 0.24841 | 0.54344 | 0.32592 | 0.888 | 0.27472 | 0.22459 | 0.35619 | 0.34933 | 0.888 | 0.3068  | 0.44379 | 0.43778 | 0.49231 | 0.888 | 0.35289 | 0.31051 | 0.33458 |
| 0.892 | 0.31588 | 0.24903 | 0.5406  | 0.3286  | 0.892 | 0.27704 | 0.2267  | 0.35797 | 0.35172 | 0.892 | 0.30879 | 0.44701 | 0.44043 | 0.49489 | 0.892 | 0.35454 | 0.31191 | 0.33524 |
| 0.896 | 0.31647 | 0.24964 | 0.53801 | 0.33152 | 0.896 | 0.2796  | 0.22834 | 0.35974 | 0.3545  | 0.896 | 0.31086 | 0.4497  | 0.44256 | 0.49799 | 0.896 | 0.3562  | 0.31365 | 0.33591 |
| 0.9   | 0.31677 | 0.25025 | 0.53541 | 0.33419 | 0.9   | 0.28169 | 0.23044 | 0.36181 | 0.35689 | 0.9   | 0.31307 | 0.45239 | 0.44521 | 0.50005 | 0.9   | 0.35827 | 0.31539 | 0.33624 |
| 0.904 | 0.31736 | 0.25107 | 0.53329 | 0.33711 | 0.904 | 0.28448 | 0.23255 | 0.36417 | 0.35968 | 0.904 | 0.31534 | 0.45562 | 0.44787 | 0.50315 | 0.904 | 0.35993 | 0.31714 | 0.33724 |
| 0.908 | 0.31795 | 0.25209 | 0.53116 | 0.34028 | 0.908 | 0.28728 | 0.23513 | 0.36654 | 0.36246 | 0.908 | 0.31755 | 0.45885 | 0.45105 | 0.50624 | 0.908 | 0.36159 | 0.31923 | 0.33825 |
| 0.912 | 0.31884 | 0.25331 | 0.52904 | 0.34344 | 0.912 | 0.2903  | 0.23747 | 0.3692  | 0.36525 | 0.912 | 0.32004 | 0.46261 | 0.45371 | 0.50934 | 0.912 | 0.36366 | 0.32132 | 0.33958 |
| 0.916 | 0.31973 | 0.25433 | 0.52715 | 0.3466  | 0.916 | 0.29309 | 0.24005 | 0.37186 | 0.36804 | 0.916 | 0.32239 | 0.46584 | 0.45689 | 0.51192 | 0.916 | 0.36532 | 0.32341 | 0.34058 |
| 0.92  | 0.32091 | 0.25576 | 0.52526 | 0.35001 | 0.92  | 0.29612 | 0.24239 | 0.37482 | 0.37122 | 0.92  | 0.32467 | 0.46961 | 0.46008 | 0.51553 | 0.92  | 0.36739 | 0.32585 | 0.34191 |
| 0.924 | 0.32209 | 0.25739 | 0.52408 | 0.35342 | 0.924 | 0.2996  | 0.24567 | 0.37807 | 0.3744  | 0.924 | 0.32731 | 0.47283 | 0.46326 | 0.51863 | 0.924 | 0.36946 | 0.32829 | 0.34358 |
| 0.928 | 0.32328 | 0.25882 | 0.52266 | 0.35707 | 0.928 | 0.30286 | 0.24848 | 0.38132 | 0.37759 | 0.928 | 0.33001 | 0.47766 | 0.46645 | 0.52172 | 0.928 | 0.37153 | 0.33073 | 0.34491 |
| 0.932 | 0.32476 | 0.26045 | 0.52125 | 0.36048 | 0.932 | 0.30612 | 0.25152 | 0.38457 | 0.38077 | 0.932 | 0.3325  | 0.48037 | 0.46963 | 0.52482 | 0.932 | 0.3736  | 0.33317 | 0.34658 |
| 0.936 | 0.32653 | 0.26229 | 0.5203  | 0.36413 | 0.936 | 0.30984 | 0.2548  | 0.38812 | 0.38435 | 0.936 | 0.33521 | 0.48413 | 0.47282 | 0.52843 | 0.936 | 0.37567 | 0.33596 | 0.34858 |
| 0.94  | 0.32831 | 0.26433 | 0.51936 | 0.36826 | 0.94  | 0.31356 | 0.25808 | 0.39196 | 0.38793 | 0.94  | 0.33799 | 0.4879  | 0.47653 | 0.53204 | 0.94  | 0.37774 | 0.3391  | 0.35058 |
| 0.944 | 0.33008 | 0.26637 | 0.51865 | 0.37216 | 0.944 | 0.31752 | 0.26183 | 0.3958  | 0.39152 | 0.944 | 0.34055 | 0.49166 | 0.47972 | 0.53514 | 0.944 | 0.37982 | 0.34189 | 0.35291 |
| 0.948 | 0.33185 | 0.26841 | 0.51794 | 0.37605 | 0.948 | 0.321   | 0.26534 | 0.39935 | 0.3951  | 0.948 | 0.34311 | 0.49543 | 0.48344 | 0.53875 | 0.948 | 0.38189 | 0.34467 | 0.35491 |
| 0.952 | 0.33363 | 0.27066 | 0.51747 | 0.37994 | 0.952 | 0.32519 | 0.26885 | 0.40319 | 0.39908 | 0.952 | 0.34582 | 0.49919 | 0.48662 | 0.54236 | 0.952 | 0.38437 | 0.34781 | 0.35725 |
| 0.956 | 0.3357  | 0.2729  | 0.51723 | 0.38408 | 0.956 | 0.32915 | 0.2726  | 0.40733 | 0.40266 | 0.956 | 0.34852 | 0.50296 | 0.49034 |         |       |         |         |         |

|       |         |         |         |         |       |         |         |         |         |       |         |         |         |         |       |         |         |         |
|-------|---------|---------|---------|---------|-------|---------|---------|---------|---------|-------|---------|---------|---------|---------|-------|---------|---------|---------|
| 1.112 | 0.43537 | 0.38412 | 0.55737 | 0.50137 | 1.112 | 0.4843  | 0.41897 | 0.52468 | 0.54195 | 1.112 | 0.45746 | 0.59387 | 0.58484 | 0.61872 | 1.112 | 0.4751  | 0.47922 | 0.47326 |
| 1.116 | 0.4407  | 0.38963 | 0.56091 | 0.50746 | 1.116 | 0.49081 | 0.42623 | 0.5303  | 0.54752 | 1.116 | 0.46173 | 0.59817 | 0.58908 | 0.62078 | 1.116 | 0.47924 | 0.4848  | 0.4786  |
| 1.12  | 0.44632 | 0.39534 | 0.56445 | 0.51379 | 1.12  | 0.49756 | 0.43349 | 0.53591 | 0.55349 | 1.12  | 0.46671 | 0.60194 | 0.5928  | 0.62388 | 1.12  | 0.48297 | 0.49038 | 0.48393 |
| 1.124 | 0.45194 | 0.40126 | 0.56799 | 0.52011 | 1.124 | 0.50454 | 0.44052 | 0.54153 | 0.55906 | 1.124 | 0.4717  | 0.60624 | 0.59652 | 0.62594 | 1.124 | 0.48712 | 0.49596 | 0.48927 |
| 1.128 | 0.45785 | 0.40738 | 0.572   | 0.52693 | 1.128 | 0.51175 | 0.44848 | 0.54774 | 0.56543 | 1.128 | 0.47739 | 0.61054 | 0.6013  | 0.62904 | 1.128 | 0.49167 | 0.50223 | 0.49527 |
| 1.132 | 0.46436 | 0.41391 | 0.57625 | 0.53423 | 1.132 | 0.51942 | 0.45644 | 0.55365 | 0.57179 | 1.132 | 0.48238 | 0.61538 | 0.60554 | 0.63265 | 1.132 | 0.49623 | 0.50816 | 0.50127 |
| 1.136 | 0.47057 | 0.42085 | 0.58074 | 0.54153 | 1.136 | 0.5271  | 0.4644  | 0.56015 | 0.57776 | 1.136 | 0.48807 | 0.62023 | 0.61032 | 0.63574 | 1.136 | 0.5012  | 0.51478 | 0.50727 |
| 1.14  | 0.47737 | 0.42759 | 0.58499 | 0.54858 | 1.14  | 0.53501 | 0.47307 | 0.56666 | 0.58413 | 1.14  | 0.49377 | 0.62507 | 0.6151  | 0.63884 | 1.14  | 0.50659 | 0.5214  | 0.5136  |
| 1.144 | 0.48447 | 0.43473 | 0.59018 | 0.55613 | 1.144 | 0.54292 | 0.48126 | 0.57346 | 0.59089 | 1.144 | 0.50018 | 0.62991 | 0.61988 | 0.64297 | 1.144 | 0.51156 | 0.52803 | 0.51994 |
| 1.148 | 0.49157 | 0.44269 | 0.59537 | 0.56416 | 1.148 | 0.55129 | 0.49087 | 0.58085 | 0.59766 | 1.148 | 0.50659 | 0.63583 | 0.62519 | 0.6471  | 1.148 | 0.51736 | 0.53535 | 0.52694 |
| 1.152 | 0.49926 | 0.45065 | 0.6008  | 0.57219 | 1.152 | 0.56013 | 0.5     | 0.58794 | 0.60443 | 1.152 | 0.51299 | 0.6412  | 0.63103 | 0.65122 | 1.152 | 0.52357 | 0.54267 | 0.53427 |
| 1.156 | 0.50665 | 0.4586  | 0.606   | 0.57998 | 1.156 | 0.56585 | 0.50937 | 0.59503 | 0.61119 | 1.156 | 0.52011 | 0.64658 | 0.6358  | 0.65535 | 1.156 | 0.52937 | 0.54999 | 0.54161 |
| 1.16  | 0.51494 | 0.46738 | 0.61213 | 0.58849 | 1.16  | 0.57758 | 0.5192  | 0.60272 | 0.61875 | 1.16  | 0.52723 | 0.6525  | 0.64217 | 0.66051 | 1.16  | 0.536   | 0.558   | 0.54894 |
| 1.164 | 0.52351 | 0.47615 | 0.61804 | 0.59726 | 1.164 | 0.58642 | 0.52927 | 0.611   | 0.62592 | 1.164 | 0.53435 | 0.65842 | 0.64801 | 0.66515 | 1.164 | 0.54304 | 0.56602 | 0.55694 |
| 1.168 | 0.53209 | 0.48513 | 0.62441 | 0.60577 | 1.168 | 0.59572 | 0.53981 | 0.61868 | 0.63348 | 1.168 | 0.54219 | 0.66487 | 0.65439 | 0.67031 | 1.168 | 0.55009 | 0.57439 | 0.56461 |
| 1.172 | 0.54096 | 0.49452 | 0.63126 | 0.61453 | 1.172 | 0.60526 | 0.54988 | 0.62725 | 0.64104 | 1.172 | 0.55002 | 0.67133 | 0.66023 | 0.67547 | 1.172 | 0.55713 | 0.58275 | 0.57261 |
| 1.176 | 0.54984 | 0.50432 | 0.63763 | 0.62354 | 1.176 | 0.61479 | 0.56066 | 0.63583 | 0.6486  | 1.176 | 0.55785 | 0.67725 | 0.6666  | 0.68115 | 1.176 | 0.565   | 0.59112 | 0.58094 |
| 1.18  | 0.5593  | 0.51432 | 0.64471 | 0.63278 | 1.18  | 0.6248  | 0.5719  | 0.6441  | 0.65656 | 1.18  | 0.56639 | 0.68424 | 0.6735  | 0.68682 | 1.18  | 0.57287 | 0.60018 | 0.58961 |
| 1.184 | 0.56965 | 0.52554 | 0.65274 | 0.64276 | 1.184 | 0.6355  | 0.58384 | 0.65415 | 0.66531 | 1.184 | 0.57565 | 0.69177 | 0.68146 | 0.69353 | 1.184 | 0.58157 | 0.60994 | 0.59928 |
| 1.188 | 0.57941 | 0.53574 | 0.66006 | 0.65177 | 1.188 | 0.64527 | 0.59508 | 0.66273 | 0.67367 | 1.188 | 0.58491 | 0.69876 | 0.68836 | 0.69921 | 1.188 | 0.58986 | 0.619   | 0.60828 |
| 1.192 | 0.58977 | 0.54697 | 0.66808 | 0.66174 | 1.192 | 0.6555  | 0.60703 | 0.67218 | 0.68203 | 1.192 | 0.59416 | 0.70629 | 0.6958  | 0.70591 | 1.192 | 0.59897 | 0.62876 | 0.61795 |
| 1.196 | 0.60041 | 0.55819 | 0.67635 | 0.67148 | 1.196 | 0.6662  | 0.61897 | 0.68164 | 0.69118 | 1.196 | 0.60413 | 0.71382 | 0.70376 | 0.71262 | 1.196 | 0.60809 | 0.63852 | 0.62762 |
| 1.2   | 0.61106 | 0.56982 | 0.68437 | 0.68121 | 1.2   | 0.67667 | 0.63115 | 0.6914  | 0.69994 | 1.2   | 0.6141  | 0.72136 | 0.71172 | 0.71933 | 1.2   | 0.61762 | 0.64863 | 0.63762 |
| 1.204 | 0.62201 | 0.58186 | 0.69263 | 0.69119 | 1.204 | 0.68714 | 0.64333 | 0.70115 | 0.70869 | 1.204 | 0.62478 | 0.72942 | 0.71969 | 0.72655 | 1.204 | 0.62714 | 0.65909 | 0.64729 |
| 1.208 | 0.63324 | 0.59411 | 0.70137 | 0.70141 | 1.208 | 0.69807 | 0.65597 | 0.7115  | 0.71784 | 1.208 | 0.63546 | 0.73749 | 0.72765 | 0.73377 | 1.208 | 0.6375  | 0.6692  | 0.65762 |
| 1.212 | 0.64478 | 0.60717 | 0.71058 | 0.71187 | 1.212 | 0.70947 | 0.66909 | 0.72155 | 0.72779 | 1.212 | 0.64685 | 0.7461  | 0.73614 | 0.74151 | 1.212 | 0.64827 | 0.68035 | 0.66862 |
| 1.216 | 0.65691 | 0.62043 | 0.72025 | 0.72258 | 1.216 | 0.7211  | 0.68244 | 0.73189 | 0.73734 | 1.216 | 0.65753 | 0.75471 | 0.74517 | 0.74977 | 1.216 | 0.65946 | 0.69151 | 0.67962 |
| 1.22  | 0.66903 | 0.6339  | 0.72946 | 0.73329 | 1.22  | 0.73203 | 0.69508 | 0.74224 | 0.7469  | 1.22  | 0.66892 | 0.76331 | 0.75366 | 0.75802 | 1.22  | 0.67064 | 0.70231 | 0.69063 |
| 1.224 | 0.68205 | 0.64798 | 0.73961 | 0.74448 | 1.224 | 0.74366 | 0.7089  | 0.75347 | 0.75684 | 1.224 | 0.68103 | 0.773   | 0.76322 | 0.76679 | 1.224 | 0.68266 | 0.71417 | 0.70263 |
| 1.228 | 0.69536 | 0.66267 | 0.75    | 0.75592 | 1.228 | 0.75529 | 0.72248 | 0.76471 | 0.76719 | 1.228 | 0.69384 | 0.78214 | 0.77278 | 0.77608 | 1.228 | 0.69509 | 0.72637 | 0.71496 |
| 1.232 | 0.70896 | 0.67757 | 0.76086 | 0.76736 | 1.232 | 0.76739 | 0.7363  | 0.77564 | 0.77794 | 1.232 | 0.70666 | 0.79129 | 0.78233 | 0.78537 | 1.232 | 0.70793 | 0.73857 | 0.7273  |
| 1.236 | 0.72227 | 0.69226 | 0.77148 | 0.77855 | 1.236 | 0.77902 | 0.74965 | 0.78658 | 0.78868 | 1.236 | 0.72019 | 0.80097 | 0.79189 | 0.79465 | 1.236 | 0.72077 | 0.75042 | 0.73997 |
| 1.24  | 0.73647 | 0.70777 | 0.78258 | 0.79023 | 1.24  | 0.79088 | 0.76347 | 0.79811 | 0.79982 | 1.24  | 0.733   | 0.81065 | 0.80197 | 0.80446 | 1.24  | 0.73444 | 0.76332 | 0.75297 |
| 1.244 | 0.75126 | 0.72389 | 0.79462 | 0.80264 | 1.244 | 0.80368 | 0.77799 | 0.81023 | 0.81097 | 1.244 | 0.74795 | 0.82141 | 0.81259 | 0.81478 | 1.244 | 0.74894 | 0.77621 | 0.76664 |
| 1.248 | 0.76634 | 0.74063 | 0.80689 | 0.8153  | 1.248 | 0.81624 | 0.79227 | 0.82235 | 0.82291 | 1.248 | 0.76219 | 0.83217 | 0.82374 | 0.82561 | 1.248 | 0.76386 | 0.78946 | 0.78064 |
| 1.252 | 0.78143 | 0.75736 | 0.81893 | 0.82746 | 1.252 | 0.8288  | 0.80656 | 0.83388 | 0.83445 | 1.252 | 0.77714 | 0.84239 | 0.83436 | 0.83645 | 1.252 | 0.77836 | 0.80305 | 0.79464 |
| 1.256 | 0.79769 | 0.77491 | 0.83215 | 0.84036 | 1.256 | 0.84182 | 0.82131 | 0.84629 | 0.84639 | 1.256 | 0.79352 | 0.85368 | 0.84657 | 0.84831 | 1.256 | 0.7941  | 0.81735 | 0.80964 |
| 1.26  | 0.81396 | 0.79307 | 0.84537 | 0.85375 | 1.26  | 0.85532 | 0.83677 | 0.859   | 0.85912 | 1.26  | 0.80918 | 0.86498 | 0.85825 | 0.85966 | 1.26  | 0.81026 | 0.83233 | 0.82498 |
| 1.264 | 0.83082 | 0.81164 | 0.85883 | 0.86689 | 1.264 | 0.86834 | 0.85176 | 0.87171 | 0.87186 | 1.264 | 0.82627 | 0.87682 | 0.87046 | 0.87205 | 1.264 | 0.82683 | 0.84732 | 0.84065 |
| 1.268 | 0.84738 | 0.83042 | 0.87276 | 0.87978 | 1.268 | 0.88207 | 0.86674 | 0.88472 | 0.88459 | 1.268 | 0.84265 | 0.88919 | 0.8832  | 0.88494 | 1.268 | 0.84381 | 0.86266 | 0.85665 |
| 1.272 | 0.86483 | 0.84981 | 0.88716 | 0.8939  | 1.272 | 0.89579 | 0.88244 | 0.89802 | 0.89812 | 1.272 | 0.86045 | 0.90102 | 0.89647 | 0.89733 | 1.272 | 0.86121 | 0.87835 | 0.87298 |
| 1.276 | 0.88258 | 0.8698  | 0.90203 | 0.90826 | 1.276 | 0.90975 | 0.89836 | 0.91221 | 0.91165 | 1.276 | 0.87896 | 0.91447 | 0.91028 | 0.91074 | 1.276 | 0.87986 | 0.89438 | 0.88999 |
| 1.28  | 0.90121 | 0.89001 | 0.91737 | 0.9231  | 1.28  | 0.92417 | 0.91452 | 0.92581 | 0.92598 | 1.28  | 0.89818 | 0.92792 | 0.92408 | 0.92467 | 1.28  | 0.89891 | 0.91111 | 0.90732 |
| 1.284 | 0.91985 | 0.91082 | 0.93272 | 0.93722 | 1.284 | 0.93836 | 0.93044 | 0.9397  | 0.93951 | 1.284 | 0.91741 | 0.94137 | 0.93842 | 0.9386  | 1.284 | 0.91756 | 0.92784 | 0.92466 |
| 1.288 | 0.93966 | 0.93286 | 0.94948 | 0.95303 | 1.288 | 0.95394 | 0.94778 | 0.95507 | 0.95423 | 1.288 | 0.93806 | 0.95589 | 0.95328 | 0.95357 | 1.288 | 0.93786 | 0.94562 | 0.94299 |
| 1.292 | 0.95978 | 0.9549  | 0.96624 | 0.96836 | 1.292 | 0.96906 | 0.96487 | 0.96985 | 0.96936 | 1.292 | 0.9587  | 0.97095 | 0.96815 | 0.96904 | 1.292 | 0.95816 | 0.9634  | 0.96199 |
| 1.296 | 0.97989 | 0.97714 | 0.983   | 0.98394 | 1.296 | 0.98465 | 0.9822  | 0.98463 | 0.98448 | 1.296 | 0.97935 | 0.98548 | 0.98354 | 0.98401 | 1.296 | 0.97887 | 0.98153 | 0.981   |
| 1.3   | 1       | 1       | 1       | 1       | 1.3   | 1       | 1       | 1       | 1       | 1.3   | 1       | 1       | 1       | 1       | 1.3   | 1       | 1       | 1       |

Ethanol-PBS (Spring)

|       |          |          |          |          |
|-------|----------|----------|----------|----------|
| 0.004 | 0.02761  | 0.0374   | 0.02817  | 0.04883  |
| 0.008 | 0.02284  | 0.03227  | 0.02326  | 0.0427   |
| 0.012 | 0.01851  | 0.02792  | 0.01836  | 0.03681  |
| 0.016 | 0.01489  | 0.02371  | 0.01467  | 0.03148  |
| 0.02  | 0.01166  | 0.01985  | 0.01071  | 0.02705  |
| 0.024 | 0.00872  | 0.01642  | 0.00756  | 0.02303  |
| 0.028 | 0.00642  | 0.01323  | 0.0049   | 0.01934  |
| 0.032 | 0.00421  | 0.01047  | 0.00292  | 0.01571  |
| 0.036 | 0.00255  | 0.00761  | 0.00121  | 0.01231  |
| 0.04  | 0.00136  | 0.00573  | 2.70E-04 | 0.00964  |
| 0.044 | 3.83E-04 | 0.00379  | 0        | 0.00726  |
| 0.048 | 0        | 0.00248  | 2.25E-04 | 0.00493  |
| 0.052 | 4.25E-05 | 0.00106  | 0.0013   | 0.00346  |
| 0.056 | 4.25E-04 | 1.42E-04 | 0.00337  | 0.00153  |
| 0.06  | 0.00217  | 1.06E-04 | 0.00675  | 8.51E-04 |
| 0.064 | 0.00387  | 0        | 0.01048  | 1.13E-04 |
| 0.068 | 0.00651  | 6.37E-04 | 0.0157   | 0        |
| 0.072 | 0.00983  | 0.00173  | 0.02196  | 7.37E-04 |
| 0.076 | 0.01404  | 0.0035   | 0.02951  | 0.00164  |
| 0.08  | 0.01893  | 0.00573  | 0.03851  | 0.00335  |
| 0.084 | 0.02489  | 0.00856  | 0.04886  | 0.00578  |
| 0.088 | 0.03152  | 0.01189  | 0.06101  | 0.00885  |
| 0.092 | 0.03901  | 0.01603  | 0.07451  | 0.01242  |
| 0.096 | 0.04726  | 0.02095  | 0.09025  | 0.01645  |
| 0.1   | 0.05581  | 0.02604  | 0.1069   | 0.02121  |
| 0.104 | 0.06534  | 0.03199  | 0.12535  | 0.0262   |
| 0.108 | 0.07513  | 0.03839  | 0.14515  | 0.03182  |
| 0.112 | 0.08517  | 0.04529  | 0.16629  | 0.03754  |
| 0.116 | 0.09559  | 0.05237  | 0.18789  | 0.0      |



|       |         |         |         |         |       |         |         |         |         |       |         |         |         |         |         |         |         |         |
|-------|---------|---------|---------|---------|-------|---------|---------|---------|---------|-------|---------|---------|---------|---------|---------|---------|---------|---------|
| 0.196 | 0.26618 | 0.23355 | 0.63781 | 0.19753 | 0.196 | 0.16705 | 0.12895 | 0.21367 | 0.01942 | 0.196 | 0.20527 | 0.10373 | 0.23701 | 0.21399 | 0.196   | 0.19672 | 0.17253 | 0.30195 |
| 0.2   | 0.27256 | 0.24168 | 0.64951 | 0.20547 | 0.2   | 0.17758 | 0.13709 | 0.22212 | 0.02108 | 0.2   | 0.21174 | 0.10788 | 0.24839 | 0.23388 | 0.2     | 0.20399 | 0.17937 | 0.31341 |
| 0.204 | 0.27766 | 0.24912 | 0.65941 | 0.21284 | 0.204 | 0.18712 | 0.14421 | 0.22898 | 0.02282 | 0.204 | 0.21652 | 0.11159 | 0.25874 | 0.2524  | 0.204   | 0.2092  | 0.1847  | 0.32371 |
| 0.208 | 0.28107 | 0.25513 | 0.66751 | 0.21908 | 0.208 | 0.19567 | 0.15031 | 0.23479 | 0.02404 | 0.208 | 0.2206  | 0.11463 | 0.26776 | 0.26955 | 0.208   | 0.21256 | 0.18812 | 0.33173 |
| 0.212 | 0.28319 | 0.26044 | 0.67291 | 0.22248 | 0.212 | 0.20291 | 0.1554  | 0.23902 | 0.02505 | 0.212 | 0.22312 | 0.11722 | 0.27575 | 0.28464 | 0.212   | 0.21419 | 0.19002 | 0.33803 |
| 0.216 | 0.28277 | 0.26362 | 0.67695 | 0.22475 | 0.216 | 0.20784 | 0.15895 | 0.24113 | 0.02585 | 0.216 | 0.22435 | 0.11929 | 0.28221 | 0.2963  | 0.216   | 0.21419 | 0.19078 | 0.34261 |
| 0.22  | 0.28149 | 0.2661  | 0.6801  | 0.22532 | 0.22  | 0.21179 | 0.16099 | 0.24166 | 0.02643 | 0.22  | 0.22364 | 0.12115 | 0.28713 | 0.3059  | 0.22    | 0.21245 | 0.18964 | 0.3449  |
| 0.224 | 0.27809 | 0.26681 | 0.681   | 0.22418 | 0.224 | 0.21344 | 0.1615  | 0.2406  | 0.02708 | 0.224 | 0.22222 | 0.12218 | 0.29033 | 0.31276 | 0.224   | 0.2092  | 0.18698 | 0.34433 |
| 0.228 | 0.27341 | 0.26575 | 0.67965 | 0.22135 | 0.228 | 0.21311 | 0.15997 | 0.23796 | 0.02765 | 0.228 | 0.21846 | 0.12307 | 0.29161 | 0.31481 | 0.228   | 0.20442 | 0.18242 | 0.34146 |
| 0.232 | 0.26745 | 0.26327 | 0.6765  | 0.21738 | 0.232 | 0.2108  | 0.15692 | 0.23426 | 0.02758 | 0.232 | 0.21361 | 0.12344 | 0.29097 | 0.31413 | 0.232   | 0.19879 | 0.17633 | 0.33631 |
| 0.236 | 0.26065 | 0.25973 | 0.67201 | 0.21227 | 0.236 | 0.20653 | 0.15336 | 0.22845 | 0.02729 | 0.236 | 0.20779 | 0.12337 | 0.28905 | 0.30933 | 0.236   | 0.1926  | 0.16987 | 0.32944 |
| 0.24  | 0.25299 | 0.25442 | 0.66481 | 0.20603 | 0.24  | 0.20093 | 0.14828 | 0.22264 | 0.02736 | 0.24  | 0.20087 | 0.12307 | 0.2856  | 0.30178 | 0.24    | 0.18523 | 0.16188 | 0.32085 |
| 0.244 | 0.24405 | 0.24805 | 0.65671 | 0.19923 | 0.244 | 0.19435 | 0.14217 | 0.21631 | 0.02708 | 0.244 | 0.19336 | 0.12159 | 0.28099 | 0.29081 | 0.244   | 0.17796 | 0.15352 | 0.31054 |
| 0.248 | 0.23555 | 0.24098 | 0.64681 | 0.19299 | 0.248 | 0.18679 | 0.13506 | 0.20891 | 0.02635 | 0.248 | 0.18541 | 0.121   | 0.27517 | 0.27778 | 0.248   | 0.17016 | 0.14477 | 0.29909 |
| 0.252 | 0.22704 | 0.23319 | 0.63691 | 0.18618 | 0.252 | 0.17856 | 0.12895 | 0.20205 | 0.02585 | 0.252 | 0.17719 | 0.11989 | 0.26904 | 0.26337 | 0.252   | 0.16246 | 0.13602 | 0.28764 |
| 0.256 | 0.21896 | 0.2247  | 0.62656 | 0.17938 | 0.256 | 0.16968 | 0.12183 | 0.19571 | 0.0252  | 0.256 | 0.16897 | 0.11907 | 0.26264 | 0.2476  | 0.256   | 0.15497 | 0.12766 | 0.27561 |
| 0.26  | 0.21087 | 0.2155  | 0.61487 | 0.17257 | 0.26  | 0.16113 | 0.11522 | 0.18885 | 0.02462 | 0.26  | 0.16056 | 0.11774 | 0.25663 | 0.23182 | 0.26    | 0.14727 | 0.1188  | 0.26301 |
| 0.264 | 0.20449 | 0.20665 | 0.60362 | 0.16747 | 0.264 | 0.1529  | 0.10912 | 0.18357 | 0.0244  | 0.264 | 0.15325 | 0.11685 | 0.25075 | 0.21536 | 0.264   | 0.14044 | 0.11134 | 0.25156 |
| 0.268 | 0.19811 | 0.19816 | 0.59327 | 0.16237 | 0.268 | 0.14534 | 0.10302 | 0.17881 | 0.02448 | 0.268 | 0.14601 | 0.11611 | 0.24493 | 0.19959 | 0.268   | 0.13393 | 0.10419 | 0.24011 |
| 0.272 | 0.19258 | 0.19038 | 0.58337 | 0.15783 | 0.272 | 0.13777 | 0.09794 | 0.17512 | 0.02426 | 0.272 | 0.13935 | 0.11515 | 0.23975 | 0.18519 | 0.272   | 0.12775 | 0.09739 | 0.22923 |
| 0.276 | 0.18833 | 0.18259 | 0.57392 | 0.15329 | 0.276 | 0.13152 | 0.09387 | 0.17195 | 0.02448 | 0.276 | 0.13333 | 0.11529 | 0.23502 | 0.17147 | 0.276   | 0.1219  | 0.0913  | 0.21949 |
| 0.28  | 0.18492 | 0.17551 | 0.56627 | 0.14989 | 0.28  | 0.1256  | 0.0898  | 0.16984 | 0.02477 | 0.28  | 0.12796 | 0.11507 | 0.23125 | 0.15912 | 0.28    | 0.11712 | 0.08606 | 0.21033 |
| 0.284 | 0.18237 | 0.1695  | 0.55907 | 0.14705 | 0.284 | 0.12067 | 0.08675 | 0.16878 | 0.02534 | 0.284 | 0.12311 | 0.11581 | 0.22844 | 0.14815 | 0.284   | 0.11289 | 0.08161 | 0.20231 |
| 0.288 | 0.18109 | 0.16419 | 0.55368 | 0.14479 | 0.288 | 0.11639 | 0.08471 | 0.16825 | 0.02643 | 0.288 | 0.11929 | 0.11648 | 0.22601 | 0.13923 | 0.288   | 0.10942 | 0.07754 | 0.19527 |
| 0.292 | 0.18067 | 0.15994 | 0.54918 | 0.14308 | 0.292 | 0.1131  | 0.08319 | 0.16878 | 0.02736 | 0.292 | 0.11554 | 0.11766 | 0.22473 | 0.131   | 0.292   | 0.10639 | 0.07434 | 0.18937 |
| 0.296 | 0.18067 | 0.1564  | 0.54603 | 0.14308 | 0.296 | 0.11113 | 0.08217 | 0.17036 | 0.02852 | 0.296 | 0.11282 | 0.11981 | 0.22422 | 0.12414 | 0.296   | 0.10422 | 0.07172 | 0.18405 |
| 0.3   | 0.18152 | 0.15393 | 0.54423 | 0.14308 | 0.3   | 0.10948 | 0.08217 | 0.173   | 0.03011 | 0.3   | 0.11069 | 0.12204 | 0.22435 | 0.11934 | 0.3     | 0.10303 | 0.06974 | 0.17969 |
| 0.304 | 0.18322 | 0.15287 | 0.54288 | 0.14422 | 0.304 | 0.10882 | 0.08268 | 0.17617 | 0.03184 | 0.304 | 0.10939 | 0.125   | 0.22518 | 0.11523 | 0.304   | 0.10303 | 0.06856 | 0.17637 |
| 0.308 | 0.18577 | 0.15216 | 0.54288 | 0.14592 | 0.308 | 0.10882 | 0.0837  | 0.17987 | 0.03408 | 0.308 | 0.10765 | 0.12893 | 0.22671 | 0.1118  | 0.308   | 0.10346 | 0.06776 | 0.17374 |
| 0.312 | 0.18875 | 0.15251 | 0.54333 | 0.14762 | 0.312 | 0.10915 | 0.08573 | 0.18462 | 0.03646 | 0.312 | 0.10687 | 0.13308 | 0.22818 | 0.10974 | 0.312   | 0.10433 | 0.06757 | 0.17151 |
| 0.316 | 0.19258 | 0.15393 | 0.54558 | 0.15046 | 0.316 | 0.11047 | 0.08827 | 0.19043 | 0.03913 | 0.316 | 0.10732 | 0.13856 | 0.23074 | 0.10905 | 0.316   | 0.10715 | 0.0678  | 0.17082 |
| 0.32  | 0.19726 | 0.15605 | 0.54873 | 0.15386 | 0.32  | 0.11277 | 0.09133 | 0.19677 | 0.04202 | 0.32  | 0.10732 | 0.14434 | 0.23349 | 0.10905 | 0.32    | 0.11062 | 0.06868 | 0.17059 |
| 0.324 | 0.20237 | 0.15853 | 0.55233 | 0.15726 | 0.324 | 0.1154  | 0.09488 | 0.20363 | 0.04505 | 0.324 | 0.10816 | 0.15116 | 0.23675 | 0.10905 | 0.324   | 0.11528 | 0.06978 | 0.17082 |
| 0.328 | 0.20747 | 0.16207 | 0.55683 | 0.16237 | 0.328 | 0.11869 | 0.09946 | 0.21208 | 0.04874 | 0.328 | 0.10965 | 0.15871 | 0.24052 | 0.1118  | 0.328   | 0.12059 | 0.07157 | 0.17225 |
| 0.332 | 0.21385 | 0.16667 | 0.56267 | 0.16747 | 0.332 | 0.12264 | 0.10404 | 0.22106 | 0.05249 | 0.332 | 0.11146 | 0.16709 | 0.24429 | 0.11385 | 0.332   | 0.12732 | 0.07392 | 0.1742  |
| 0.336 | 0.22066 | 0.17162 | 0.56807 | 0.17314 | 0.336 | 0.12692 | 0.11014 | 0.23057 | 0.05625 | 0.336 | 0.11353 | 0.17657 | 0.24909 | 0.11728 | 0.336   | 0.13556 | 0.07659 | 0.1762  |
| 0.34  | 0.22789 | 0.17728 | 0.57527 | 0.17995 | 0.34  | 0.13152 | 0.11624 | 0.2406  | 0.06094 | 0.34  | 0.1156  | 0.18702 | 0.25376 | 0.1214  | 0.34    | 0.14456 | 0.07978 | 0.17918 |
| 0.344 | 0.23555 | 0.1833  | 0.58292 | 0.18618 | 0.344 | 0.13679 | 0.12285 | 0.25222 | 0.06556 | 0.344 | 0.11884 | 0.1988  | 0.25893 | 0.1262  | 0.344   | 0.15541 | 0.08332 | 0.18273 |
| 0.348 | 0.24405 | 0.19038 | 0.59102 | 0.19412 | 0.348 | 0.14271 | 0.13048 | 0.26436 | 0.07054 | 0.348 | 0.12214 | 0.21132 | 0.26475 | 0.13237 | 0.348   | 0.16679 | 0.08731 | 0.18679 |
| 0.352 | 0.25341 | 0.19816 | 0.60047 | 0.20206 | 0.352 | 0.14863 | 0.13811 | 0.27704 | 0.0761  | 0.352 | 0.12654 | 0.22533 | 0.27089 | 0.13855 | 0.352   | 0.18035 | 0.09165 | 0.19166 |
| 0.356 | 0.26235 | 0.20594 | 0.60947 | 0.21    | 0.356 | 0.15521 | 0.14675 | 0.29024 | 0.08209 | 0.356 | 0.13055 | 0.24029 | 0.27722 | 0.1454  | 0.356   | 0.1951  | 0.09636 | 0.19699 |
| 0.36  | 0.27298 | 0.21479 | 0.61981 | 0.21908 | 0.36  | 0.16244 | 0.1559  | 0.30397 | 0.08859 | 0.36  | 0.13527 | 0.25652 | 0.28355 | 0.15364 | 0.36    | 0.21147 | 0.10172 | 0.20289 |
| 0.364 | 0.28447 | 0.2247  | 0.63151 | 0.22985 | 0.364 | 0.17067 | 0.16658 | 0.31929 | 0.09596 | 0.364 | 0.1409  | 0.27438 | 0.29161 | 0.16324 | 0.364   | 0.23002 | 0.10746 | 0.20976 |
| 0.368 | 0.29553 | 0.23496 | 0.64321 | 0.24006 | 0.368 | 0.17856 | 0.17675 | 0.3346  | 0.10332 | 0.368 | 0.14646 | 0.29268 | 0.29992 | 0.17284 | 0.368   | 0.24965 | 0.11359 | 0.21663 |
| 0.372 | 0.30744 | 0.24558 | 0.65536 | 0.25027 | 0.372 | 0.18679 | 0.18743 | 0.35044 | 0.1109  | 0.372 | 0.15287 | 0.31194 | 0.30823 | 0.18244 | 0.372   | 0.27058 | 0.11998 | 0.22465 |
| 0.376 | 0.3202  | 0.2569  | 0.66796 | 0.26161 | 0.376 | 0.19567 | 0.19862 | 0.36629 | 0.11935 | 0.376 | 0.15888 | 0.33158 | 0.31654 | 0.19342 | 0.376   | 0.29292 | 0.1269  | 0.23209 |
| 0.38  | 0.33296 | 0.26893 | 0.68145 | 0.27239 | 0.38  | 0.20488 | 0.21031 | 0.38266 | 0.12838 | 0.38  | 0.16574 | 0.35277 | 0.32677 | 0.20508 | 0.38    | 0.31754 | 0.13488 | 0.24068 |
| 0.384 | 0.34658 | 0.28132 | 0.6954  | 0.2843  | 0.384 | 0.21442 | 0.22201 | 0.39956 | 0.13747 | 0.384 | 0.17337 | 0.37456 | 0.33636 | 0.21674 | 0.384   | 0.34367 | 0.14249 | 0.24984 |
| 0.388 | 0.36019 | 0.29406 | 0.7098  | 0.29564 | 0.388 | 0.22396 | 0.23421 | 0.4154  | 0.147   | 0.388 | 0.18088 | 0.3959  | 0.34723 | 0.2284  | 0.388   | 0.37024 | 0.15085 | 0.259   |
| 0.392 | 0.37465 | 0.3075  | 0.72465 | 0.30698 | 0.392 | 0.23383 | 0.24642 | 0.43177 | 0.15747 | 0.392 | 0.18916 | 0.41835 | 0.35874 | 0.24143 | 0.392   | 0.39931 | 0.1596  | 0.26931 |
| 0.396 | 0.38912 | 0.32095 | 0.74039 | 0.31889 | 0.396 | 0.24337 | 0.25862 | 0.44814 | 0.16823 | 0.396 | 0.1975  | 0.44057 | 0.37024 | 0.25446 | 0.396   | 0.42945 | 0.16873 | 0.27905 |
| 0.4   | 0.40401 | 0.3351  | 0.75614 | 0.3308  | 0.4   | 0.25324 | 0.27082 | 0.46293 | 0.17935 | 0.4   | 0.20637 | 0.4628  | 0.38303 | 0.2668  | 0.4     | 0.46058 | 0.17785 | 0.28935 |
| 0.404 | 0.41847 | 0.34926 | 0.77144 | 0.34214 | 0.404 | 0.26278 | 0.28252 | 0.47824 | 0.19076 | 0.404 | 0.21536 | 0.48429 | 0.39582 | 0.27984 | 0.404   | 0.4929  | 0.18736 | 0.29909 |
| 0.408 | 0.43293 | 0.3627  | 0.78719 | 0.35292 | 0.408 | 0.27232 | 0.29472 | 0.49303 | 0.20217 | 0.408 | 0.22493 | 0.50504 | 0.40861 | 0.29218 | 0.408   | 0.52521 | 0.19687 | 0.3094  |
| 0.412 | 0.44697 | 0.3765  | 0.80293 | 0.36369 | 0.412 | 0.2812  | 0.30591 | 0.50676 | 0.21386 | 0.412 | 0.23431 | 0.52504 | 0.42267 | 0.30453 | 0.412   | 0.55786 | 0.20637 | 0.31913 |
| 0.416 | 0.46059 | 0.3903  | 0.81823 | 0.37333 | 0.416 | 0.28976 | 0.31659 | 0.51996 | 0.22542 | 0.416 | 0.24337 | 0.54431 | 0.43674 | 0.31619 | 0.416</ |         |         |         |

|       |         |         |         |         |       |         |         |         |         |       |         |         |         |         |       |         |         |         |
|-------|---------|---------|---------|---------|-------|---------|---------|---------|---------|-------|---------|---------|---------|---------|-------|---------|---------|---------|
| 0.608 | 0.46952 | 0.38818 | 0.77009 | 0.42608 | 0.608 | 0.3368  | 0.40913 | 0.56115 | 0.35235 | 0.608 | 0.32397 | 0.64804 | 0.47702 | 0.40192 | 0.608 | 0.58172 | 0.30334 | 0.33459 |
| 0.612 | 0.46527 | 0.38393 | 0.76334 | 0.42381 | 0.612 | 0.33515 | 0.40761 | 0.5564  | 0.35162 | 0.612 | 0.32462 | 0.64804 | 0.4751  | 0.40261 | 0.612 | 0.5777  | 0.30258 | 0.33288 |
| 0.616 | 0.46101 | 0.3804  | 0.75659 | 0.42211 | 0.616 | 0.33318 | 0.40608 | 0.55112 | 0.35162 | 0.616 | 0.32462 | 0.6473  | 0.47382 | 0.40329 | 0.616 | 0.57412 | 0.3022  | 0.33058 |
| 0.62  | 0.45591 | 0.3765  | 0.74939 | 0.41984 | 0.62  | 0.33121 | 0.40405 | 0.54584 | 0.3509  | 0.62  | 0.32462 | 0.64656 | 0.47254 | 0.40329 | 0.62  | 0.56935 | 0.30144 | 0.32829 |
| 0.624 | 0.45123 | 0.37226 | 0.74219 | 0.417   | 0.624 | 0.3289  | 0.40151 | 0.54003 | 0.35018 | 0.624 | 0.32462 | 0.64508 | 0.47062 | 0.40329 | 0.624 | 0.56436 | 0.30068 | 0.326   |
| 0.628 | 0.44655 | 0.36801 | 0.7341  | 0.4136  | 0.628 | 0.32627 | 0.39845 | 0.53316 | 0.34946 | 0.628 | 0.32462 | 0.64286 | 0.4687  | 0.40261 | 0.628 | 0.55872 | 0.29954 | 0.32314 |
| 0.632 | 0.44144 | 0.36377 | 0.726   | 0.4102  | 0.632 | 0.32298 | 0.39591 | 0.5263  | 0.34801 | 0.632 | 0.32397 | 0.64063 | 0.46615 | 0.40192 | 0.632 | 0.55243 | 0.29802 | 0.32028 |
| 0.636 | 0.43634 | 0.35916 | 0.7179  | 0.40679 | 0.636 | 0.32035 | 0.39235 | 0.51943 | 0.34657 | 0.636 | 0.32333 | 0.63841 | 0.46359 | 0.40055 | 0.636 | 0.5456  | 0.2965  | 0.31799 |
| 0.64  | 0.43081 | 0.35456 | 0.7098  | 0.40282 | 0.64  | 0.31739 | 0.3893  | 0.51204 | 0.34513 | 0.64  | 0.32268 | 0.63545 | 0.46167 | 0.39918 | 0.64  | 0.53866 | 0.2946  | 0.31455 |
| 0.644 | 0.42528 | 0.34961 | 0.7008  | 0.39829 | 0.644 | 0.3141  | 0.38523 | 0.50412 | 0.34296 | 0.644 | 0.32139 | 0.631   | 0.45847 | 0.39712 | 0.644 | 0.53053 | 0.29269 | 0.31169 |
| 0.648 | 0.42017 | 0.34501 | 0.6918  | 0.39432 | 0.648 | 0.31048 | 0.38167 | 0.49673 | 0.34079 | 0.648 | 0.32009 | 0.62656 | 0.45592 | 0.39506 | 0.648 | 0.52294 | 0.29041 | 0.30825 |
| 0.652 | 0.41464 | 0.34006 | 0.6828  | 0.38978 | 0.652 | 0.30719 | 0.37761 | 0.4888  | 0.33863 | 0.652 | 0.3188  | 0.62211 | 0.45272 | 0.39232 | 0.652 | 0.51437 | 0.28775 | 0.30539 |
| 0.656 | 0.40911 | 0.3351  | 0.67426 | 0.38581 | 0.656 | 0.30324 | 0.37354 | 0.48088 | 0.33646 | 0.656 | 0.31751 | 0.61618 | 0.44952 | 0.38957 | 0.656 | 0.5058  | 0.28509 | 0.30253 |
| 0.66  | 0.40358 | 0.33015 | 0.66526 | 0.38071 | 0.66  | 0.29962 | 0.36896 | 0.47296 | 0.33357 | 0.66  | 0.31556 | 0.60951 | 0.44569 | 0.38615 | 0.66  | 0.49691 | 0.28205 | 0.29909 |
| 0.664 | 0.39805 | 0.32519 | 0.65626 | 0.37617 | 0.664 | 0.29568 | 0.36439 | 0.46451 | 0.33018 | 0.664 | 0.31362 | 0.60285 | 0.44185 | 0.38272 | 0.664 | 0.48823 | 0.27862 | 0.29565 |
| 0.668 | 0.39252 | 0.32024 | 0.64726 | 0.3722  | 0.668 | 0.29206 | 0.36032 | 0.45712 | 0.327   | 0.668 | 0.31168 | 0.59618 | 0.43802 | 0.37929 | 0.668 | 0.47977 | 0.27558 | 0.29336 |
| 0.672 | 0.38742 | 0.31599 | 0.63871 | 0.36766 | 0.672 | 0.28877 | 0.35625 | 0.44973 | 0.3239  | 0.672 | 0.30974 | 0.58877 | 0.43482 | 0.37654 | 0.672 | 0.47121 | 0.27254 | 0.2905  |
| 0.676 | 0.38189 | 0.31104 | 0.62971 | 0.36313 | 0.676 | 0.28482 | 0.35167 | 0.4418  | 0.32014 | 0.676 | 0.3078  | 0.58136 | 0.43034 | 0.37243 | 0.676 | 0.46275 | 0.26874 | 0.28706 |
| 0.68  | 0.37678 | 0.30644 | 0.62116 | 0.35859 | 0.68  | 0.2812  | 0.34761 | 0.43441 | 0.31668 | 0.68  | 0.30521 | 0.57321 | 0.42651 | 0.369   | 0.68  | 0.45461 | 0.26532 | 0.2842  |
| 0.684 | 0.3721  | 0.30184 | 0.61262 | 0.35462 | 0.684 | 0.27791 | 0.34354 | 0.42755 | 0.31314 | 0.684 | 0.30327 | 0.56506 | 0.42267 | 0.36557 | 0.684 | 0.44691 | 0.26189 | 0.28077 |
| 0.688 | 0.367   | 0.29759 | 0.60362 | 0.35122 | 0.688 | 0.27462 | 0.33947 | 0.42121 | 0.30924 | 0.688 | 0.30198 | 0.55765 | 0.41884 | 0.36214 | 0.688 | 0.44008 | 0.25885 | 0.2779  |
| 0.692 | 0.36189 | 0.29335 | 0.59552 | 0.34725 | 0.692 | 0.271   | 0.3354  | 0.41434 | 0.30592 | 0.692 | 0.29939 | 0.5495  | 0.415   | 0.35802 | 0.692 | 0.43314 | 0.25505 | 0.27504 |
| 0.696 | 0.35764 | 0.28946 | 0.58742 | 0.34384 | 0.696 | 0.26771 | 0.33133 | 0.40853 | 0.30245 | 0.696 | 0.29745 | 0.54209 | 0.41116 | 0.3546  | 0.696 | 0.42674 | 0.25201 | 0.27218 |
| 0.7   | 0.35338 | 0.28556 | 0.57977 | 0.34044 | 0.7   | 0.26541 | 0.32777 | 0.40272 | 0.29935 | 0.7   | 0.29551 | 0.53468 | 0.40733 | 0.35117 | 0.7   | 0.421   | 0.24896 | 0.26988 |
| 0.704 | 0.34913 | 0.28167 | 0.57167 | 0.33704 | 0.704 | 0.26245 | 0.32472 | 0.39744 | 0.29617 | 0.704 | 0.29357 | 0.52727 | 0.40349 | 0.34774 | 0.704 | 0.41568 | 0.24592 | 0.26702 |
| 0.708 | 0.34488 | 0.27813 | 0.56402 | 0.3342  | 0.708 | 0.25949 | 0.32116 | 0.39216 | 0.293   | 0.708 | 0.29163 | 0.51986 | 0.40029 | 0.34431 | 0.708 | 0.41058 | 0.24288 | 0.26416 |
| 0.712 | 0.34105 | 0.27459 | 0.55683 | 0.33193 | 0.712 | 0.25719 | 0.31811 | 0.38741 | 0.29018 | 0.712 | 0.28969 | 0.51393 | 0.39646 | 0.34156 | 0.712 | 0.40614 | 0.23984 | 0.26187 |
| 0.716 | 0.33722 | 0.27141 | 0.54963 | 0.3291  | 0.716 | 0.25521 | 0.31557 | 0.38319 | 0.28765 | 0.716 | 0.28839 | 0.508   | 0.39326 | 0.33882 | 0.716 | 0.40223 | 0.23756 | 0.25958 |
| 0.72  | 0.33382 | 0.26822 | 0.54288 | 0.32683 | 0.72  | 0.25324 | 0.31252 | 0.37949 | 0.28542 | 0.72  | 0.28658 | 0.50207 | 0.39006 | 0.33608 | 0.72  | 0.39876 | 0.23527 | 0.25729 |
| 0.724 | 0.32999 | 0.26539 | 0.53613 | 0.32456 | 0.724 | 0.25094 | 0.30947 | 0.37579 | 0.28296 | 0.724 | 0.28503 | 0.49689 | 0.38687 | 0.33265 | 0.724 | 0.39529 | 0.23299 | 0.255   |
| 0.728 | 0.32701 | 0.26256 | 0.52938 | 0.32229 | 0.728 | 0.24929 | 0.30743 | 0.3721  | 0.28058 | 0.728 | 0.28367 | 0.49244 | 0.38367 | 0.3299  | 0.728 | 0.39215 | 0.23071 | 0.25271 |
| 0.732 | 0.32403 | 0.26008 | 0.52353 | 0.32059 | 0.732 | 0.24798 | 0.3054  | 0.36893 | 0.27899 | 0.732 | 0.28257 | 0.488   | 0.38111 | 0.32785 | 0.732 | 0.38987 | 0.22881 | 0.25099 |
| 0.736 | 0.32105 | 0.25761 | 0.51768 | 0.31946 | 0.736 | 0.24633 | 0.30337 | 0.36629 | 0.27726 | 0.736 | 0.28115 | 0.48429 | 0.37856 | 0.32579 | 0.736 | 0.38781 | 0.22691 | 0.2487  |
| 0.74  | 0.31808 | 0.25478 | 0.51183 | 0.31776 | 0.74  | 0.24502 | 0.30133 | 0.36312 | 0.27581 | 0.74  | 0.27998 | 0.48059 | 0.376   | 0.32305 | 0.74  | 0.38542 | 0.22539 | 0.24641 |
| 0.744 | 0.31552 | 0.25265 | 0.50643 | 0.31606 | 0.744 | 0.24403 | 0.2993  | 0.36101 | 0.27444 | 0.744 | 0.27908 | 0.47688 | 0.37344 | 0.32167 | 0.744 | 0.38401 | 0.22425 | 0.24526 |
| 0.748 | 0.31297 | 0.25088 | 0.50103 | 0.31549 | 0.748 | 0.24304 | 0.29777 | 0.35889 | 0.2735  | 0.748 | 0.27837 | 0.47466 | 0.37152 | 0.3203  | 0.748 | 0.38271 | 0.22311 | 0.24354 |
| 0.752 | 0.31084 | 0.24876 | 0.49609 | 0.31492 | 0.752 | 0.24206 | 0.29625 | 0.35678 | 0.27242 | 0.752 | 0.27759 | 0.47244 | 0.36897 | 0.31824 | 0.752 | 0.38174 | 0.22158 | 0.24183 |
| 0.756 | 0.30829 | 0.24699 | 0.49114 | 0.31379 | 0.756 | 0.2414  | 0.29523 | 0.3552  | 0.27134 | 0.756 | 0.27675 | 0.47021 | 0.36705 | 0.31687 | 0.756 | 0.38044 | 0.22082 | 0.24068 |
| 0.76  | 0.30616 | 0.24487 | 0.48619 | 0.31322 | 0.76  | 0.24074 | 0.2937  | 0.35361 | 0.27061 | 0.76  | 0.2761  | 0.46873 | 0.36449 | 0.3155  | 0.76  | 0.37957 | 0.21968 | 0.23896 |
| 0.764 | 0.30404 | 0.24345 | 0.48169 | 0.31379 | 0.764 | 0.24074 | 0.29269 | 0.35203 | 0.27018 | 0.764 | 0.27565 | 0.46725 | 0.36321 | 0.31481 | 0.764 | 0.37924 | 0.21892 | 0.23782 |
| 0.768 | 0.30191 | 0.24239 | 0.47764 | 0.31322 | 0.768 | 0.24041 | 0.29218 | 0.35044 | 0.2696  | 0.768 | 0.27552 | 0.46651 | 0.36129 | 0.31413 | 0.768 | 0.37892 | 0.21816 | 0.23667 |
| 0.772 | 0.30021 | 0.24062 | 0.47359 | 0.31322 | 0.772 | 0.24008 | 0.29116 | 0.34886 | 0.26903 | 0.772 | 0.275   | 0.46503 | 0.35938 | 0.31344 | 0.772 | 0.37816 | 0.2174  | 0.23553 |
| 0.776 | 0.29893 | 0.23992 | 0.47044 | 0.31379 | 0.776 | 0.24041 | 0.29116 | 0.34886 | 0.26946 | 0.776 | 0.27546 | 0.46577 | 0.35874 | 0.31413 | 0.776 | 0.37903 | 0.2174  | 0.23495 |
| 0.78  | 0.29723 | 0.23885 | 0.46729 | 0.31435 | 0.78  | 0.24074 | 0.29065 | 0.3478  | 0.26946 | 0.78  | 0.2752  | 0.46503 | 0.3581  | 0.31344 | 0.78  | 0.37892 | 0.21702 | 0.23438 |
| 0.784 | 0.29553 | 0.23815 | 0.46369 | 0.31492 | 0.784 | 0.24074 | 0.29015 | 0.34728 | 0.26939 | 0.784 | 0.27552 | 0.46503 | 0.35618 | 0.31344 | 0.784 | 0.37913 | 0.21626 | 0.23324 |
| 0.788 | 0.29383 | 0.23673 | 0.46054 | 0.31492 | 0.788 | 0.24074 | 0.28964 | 0.34569 | 0.26939 | 0.788 | 0.27539 | 0.46503 | 0.35554 | 0.31344 | 0.788 | 0.37935 | 0.21588 | 0.23266 |
| 0.792 | 0.29255 | 0.23602 | 0.45739 | 0.31549 | 0.792 | 0.24074 | 0.28913 | 0.34569 | 0.26924 | 0.792 | 0.27539 | 0.46577 | 0.35426 | 0.31344 | 0.792 | 0.37989 | 0.2155  | 0.23152 |
| 0.796 | 0.29085 | 0.23531 | 0.45469 | 0.31606 | 0.796 | 0.2414  | 0.28913 | 0.34516 | 0.26982 | 0.796 | 0.27552 | 0.46651 | 0.35362 | 0.31344 | 0.796 | 0.38033 | 0.21512 | 0.23152 |
| 0.8   | 0.29    | 0.23461 | 0.45244 | 0.31719 | 0.8   | 0.24173 | 0.28913 | 0.34463 | 0.26996 | 0.8   | 0.2763  | 0.46799 | 0.35298 | 0.31413 | 0.8   | 0.3812  | 0.21512 | 0.23095 |
| 0.804 | 0.28872 | 0.23425 | 0.44974 | 0.31776 | 0.804 | 0.24206 | 0.28862 | 0.34411 | 0.26996 | 0.804 | 0.2763  | 0.46873 | 0.35234 | 0.31413 | 0.804 | 0.38174 | 0.21474 | 0.23037 |
| 0.808 | 0.28745 | 0.2339  | 0.44749 | 0.31889 | 0.808 | 0.24271 | 0.28913 | 0.34358 | 0.27054 | 0.808 | 0.27694 | 0.47021 | 0.35234 | 0.31481 | 0.808 | 0.3825  | 0.21474 | 0.2298  |
| 0.812 | 0.2866  | 0.23319 | 0.44524 | 0.32002 | 0.812 | 0.24337 | 0.28913 | 0.34358 | 0.27134 | 0.812 | 0.27791 | 0.47095 | 0.3517  | 0.3155  | 0.812 | 0.38347 | 0.21474 | 0.22923 |
| 0.816 | 0.28574 | 0.23319 | 0.44344 | 0.32059 | 0.816 | 0.2437  | 0.28964 | 0.34358 | 0.2717  | 0.816 | 0.27837 | 0.47244 | 0.3517  | 0.31619 | 0.816 | 0.38488 | 0.21436 | 0.22923 |
| 0.82  | 0.28489 | 0.23284 | 0.44119 | 0.32116 | 0.82  | 0.24436 | 0.28964 | 0.34358 | 0.27227 | 0.82  | 0.27901 | 0.47466 | 0.3517  | 0.31687 | 0.82  | 0.38575 | 0.21474 | 0.22865 |
| 0.824 | 0.28362 | 0.23213 | 0.43895 | 0.32173 | 0.824 | 0.24469 | 0.28913 | 0.34305 | 0.27264 | 0.824 | 0.27927 | 0.4754  | 0.35106 | 0.31687 | 0.824 | 0.38651 | 0.21436 | 0.22808 |
| 0.828 | 0.28277 | 0.23248 | 0.4376  | 0.32229 | 0.828 | 0.24567 | 0.28964 | 0.34358 | 0.27372 | 0.828 | 0.28018 | 0.47762 | 0.35106 | 0.31824 | 0.828 | 0.38824 | 0.      |         |

|       |         |         |         |         |       |         |         |         |         |       |         |         |         |         |       |         |         |         |
|-------|---------|---------|---------|---------|-------|---------|---------|---------|---------|-------|---------|---------|---------|---------|-------|---------|---------|---------|
| 1.02  | 0.34147 | 0.29547 | 0.45919 | 0.35178 | 1.02  | 0.31245 | 0.33642 | 0.37632 | 0.36101 | 1.02  | 0.35309 | 0.55098 | 0.40157 | 0.40604 | 1.02  | 0.47066 | 0.30372 | 0.29794 |
| 1.024 | 0.34445 | 0.2983  | 0.46189 | 0.35348 | 1.024 | 0.31476 | 0.33896 | 0.3779  | 0.36318 | 1.024 | 0.35567 | 0.55246 | 0.40413 | 0.40947 | 1.024 | 0.47294 | 0.30753 | 0.30138 |
| 1.028 | 0.347   | 0.30078 | 0.46369 | 0.35519 | 1.028 | 0.31739 | 0.3415  | 0.37949 | 0.36606 | 1.028 | 0.35826 | 0.55246 | 0.40605 | 0.41221 | 1.028 | 0.47468 | 0.31095 | 0.30482 |
| 1.032 | 0.35041 | 0.30396 | 0.46639 | 0.35745 | 1.032 | 0.32002 | 0.34405 | 0.38107 | 0.36895 | 1.032 | 0.36214 | 0.5532  | 0.40861 | 0.41632 | 1.032 | 0.47728 | 0.31437 | 0.30882 |
| 1.036 | 0.35338 | 0.30715 | 0.46909 | 0.35916 | 1.036 | 0.32298 | 0.3471  | 0.38319 | 0.37256 | 1.036 | 0.36538 | 0.55468 | 0.41116 | 0.41975 | 1.036 | 0.47977 | 0.31817 | 0.31283 |
| 1.04  | 0.35679 | 0.31033 | 0.47134 | 0.36142 | 1.04  | 0.32594 | 0.34964 | 0.3853  | 0.37545 | 1.04  | 0.36926 | 0.55616 | 0.41436 | 0.42318 | 1.04  | 0.48227 | 0.32198 | 0.31741 |
| 1.044 | 0.35977 | 0.31352 | 0.47449 | 0.36369 | 1.044 | 0.3289  | 0.35269 | 0.38741 | 0.37834 | 1.044 | 0.37249 | 0.55765 | 0.41756 | 0.4273  | 1.044 | 0.48465 | 0.32578 | 0.322   |
| 1.048 | 0.36359 | 0.3167  | 0.47719 | 0.36596 | 1.048 | 0.33219 | 0.35574 | 0.38952 | 0.38195 | 1.048 | 0.37637 | 0.55913 | 0.42011 | 0.43073 | 1.048 | 0.48704 | 0.32996 | 0.326   |
| 1.052 | 0.36742 | 0.32024 | 0.48034 | 0.3688  | 1.052 | 0.33548 | 0.35879 | 0.39216 | 0.38556 | 1.052 | 0.3809  | 0.56135 | 0.42395 | 0.43484 | 1.052 | 0.49073 | 0.33414 | 0.33058 |
| 1.056 | 0.37125 | 0.32413 | 0.48349 | 0.37163 | 1.056 | 0.3391  | 0.36286 | 0.3948  | 0.38917 | 1.056 | 0.38478 | 0.56283 | 0.42715 | 0.43896 | 1.056 | 0.49344 | 0.33833 | 0.33517 |
| 1.06  | 0.37465 | 0.32767 | 0.48664 | 0.37447 | 1.06  | 0.34239 | 0.36591 | 0.39744 | 0.39278 | 1.06  | 0.38931 | 0.56506 | 0.43034 | 0.44307 | 1.06  | 0.49615 | 0.34251 | 0.33975 |
| 1.064 | 0.37891 | 0.33156 | 0.49024 | 0.37787 | 1.064 | 0.34634 | 0.36947 | 0.40008 | 0.39711 | 1.064 | 0.39384 | 0.56728 | 0.43418 | 0.44719 | 1.064 | 0.4994  | 0.34669 | 0.3449  |
| 1.068 | 0.38274 | 0.33581 | 0.49429 | 0.38071 | 1.068 | 0.35029 | 0.37354 | 0.40325 | 0.40144 | 1.068 | 0.39837 | 0.57024 | 0.43802 | 0.45199 | 1.068 | 0.50277 | 0.35126 | 0.35005 |
| 1.072 | 0.38742 | 0.34006 | 0.49744 | 0.38354 | 1.072 | 0.35423 | 0.37761 | 0.40642 | 0.40578 | 1.072 | 0.4029  | 0.57247 | 0.44249 | 0.4561  | 1.072 | 0.50613 | 0.35582 | 0.35521 |
| 1.076 | 0.39125 | 0.3443  | 0.50148 | 0.38751 | 1.076 | 0.35818 | 0.38167 | 0.40959 | 0.41011 | 1.076 | 0.40807 | 0.57543 | 0.44633 | 0.46091 | 1.076 | 0.51003 | 0.36076 | 0.36036 |
| 1.08  | 0.3955  | 0.34855 | 0.50508 | 0.39091 | 1.08  | 0.36312 | 0.38574 | 0.41276 | 0.41444 | 1.08  | 0.41325 | 0.57839 | 0.4508  | 0.46571 | 1.08  | 0.51361 | 0.36533 | 0.36552 |
| 1.084 | 0.4006  | 0.3535  | 0.50958 | 0.39545 | 1.084 | 0.36805 | 0.39083 | 0.41698 | 0.41949 | 1.084 | 0.41842 | 0.5821  | 0.45592 | 0.47119 | 1.084 | 0.51806 | 0.37065 | 0.37124 |
| 1.088 | 0.40486 | 0.35846 | 0.51408 | 0.39942 | 1.088 | 0.37266 | 0.3954  | 0.42121 | 0.42455 | 1.088 | 0.42425 | 0.5858  | 0.46039 | 0.47668 | 1.088 | 0.52218 | 0.37597 | 0.37754 |
| 1.092 | 0.40954 | 0.36341 | 0.51768 | 0.40339 | 1.092 | 0.37726 | 0.39947 | 0.4249  | 0.42888 | 1.092 | 0.42942 | 0.58877 | 0.46487 | 0.48148 | 1.092 | 0.52673 | 0.38054 | 0.38269 |
| 1.096 | 0.41464 | 0.36837 | 0.52263 | 0.40793 | 1.096 | 0.38253 | 0.40456 | 0.42913 | 0.43466 | 1.096 | 0.43524 | 0.59247 | 0.46998 | 0.48697 | 1.096 | 0.53118 | 0.38586 | 0.38899 |
| 1.1   | 0.41975 | 0.37367 | 0.52758 | 0.41247 | 1.1   | 0.38779 | 0.40964 | 0.43335 | 0.43971 | 1.1   | 0.44171 | 0.59692 | 0.4751  | 0.49246 | 1.1   | 0.53573 | 0.39157 | 0.39529 |
| 1.104 | 0.42485 | 0.37933 | 0.53253 | 0.41757 | 1.104 | 0.39272 | 0.41523 | 0.43811 | 0.44549 | 1.104 | 0.44754 | 0.60136 | 0.48085 | 0.49863 | 1.104 | 0.54072 | 0.39727 | 0.40159 |
| 1.108 | 0.43038 | 0.385   | 0.53703 | 0.42211 | 1.108 | 0.39832 | 0.42032 | 0.44233 | 0.45054 | 1.108 | 0.45336 | 0.60581 | 0.48597 | 0.50412 | 1.108 | 0.54517 | 0.40259 | 0.40789 |
| 1.112 | 0.43634 | 0.39066 | 0.54243 | 0.42721 | 1.112 | 0.40424 | 0.42591 | 0.44708 | 0.45632 | 1.112 | 0.45983 | 0.61025 | 0.49172 | 0.51029 | 1.112 | 0.54994 | 0.4083  | 0.41476 |
| 1.116 | 0.44229 | 0.39703 | 0.54828 | 0.43288 | 1.116 | 0.41016 | 0.43252 | 0.45237 | 0.46282 | 1.116 | 0.4663  | 0.61544 | 0.49747 | 0.51646 | 1.116 | 0.55482 | 0.41476 | 0.42221 |
| 1.12  | 0.44825 | 0.4034  | 0.55368 | 0.43855 | 1.12  | 0.41674 | 0.43863 | 0.45817 | 0.46931 | 1.12  | 0.47341 | 0.62063 | 0.50387 | 0.52263 | 1.12  | 0.56057 | 0.42085 | 0.42965 |
| 1.124 | 0.45421 | 0.40941 | 0.55952 | 0.44366 | 1.124 | 0.42299 | 0.44473 | 0.46346 | 0.47581 | 1.124 | 0.48053 | 0.62582 | 0.50962 | 0.52881 | 1.124 | 0.56556 | 0.42731 | 0.43652 |
| 1.128 | 0.46059 | 0.41649 | 0.56582 | 0.4499  | 1.128 | 0.42957 | 0.45134 | 0.46979 | 0.48303 | 1.128 | 0.48764 | 0.631   | 0.51602 | 0.53567 | 1.128 | 0.57087 | 0.43378 | 0.44397 |
| 1.132 | 0.46739 | 0.42286 | 0.57212 | 0.45613 | 1.132 | 0.43615 | 0.45795 | 0.47613 | 0.48953 | 1.132 | 0.49541 | 0.63693 | 0.52305 | 0.54252 | 1.132 | 0.57651 | 0.44024 | 0.45141 |
| 1.136 | 0.47377 | 0.42994 | 0.57842 | 0.46237 | 1.136 | 0.44338 | 0.46507 | 0.48194 | 0.49675 | 1.136 | 0.50317 | 0.64286 | 0.52944 | 0.54938 | 1.136 | 0.58226 | 0.44747 | 0.45943 |
| 1.14  | 0.48058 | 0.43701 | 0.58427 | 0.46861 | 1.14  | 0.45029 | 0.47219 | 0.48828 | 0.50397 | 1.14  | 0.51029 | 0.64878 | 0.53647 | 0.55624 | 1.14  | 0.58833 | 0.45469 | 0.46687 |
| 1.144 | 0.48781 | 0.44444 | 0.59102 | 0.47542 | 1.144 | 0.45786 | 0.4793  | 0.49514 | 0.51119 | 1.144 | 0.51805 | 0.65545 | 0.54351 | 0.56379 | 1.144 | 0.59451 | 0.46192 | 0.47489 |
| 1.148 | 0.49504 | 0.45223 | 0.59777 | 0.48279 | 1.148 | 0.46575 | 0.48693 | 0.50201 | 0.51913 | 1.148 | 0.52711 | 0.66212 | 0.55118 | 0.57133 | 1.148 | 0.60124 | 0.46952 | 0.48348 |
| 1.152 | 0.5027  | 0.46072 | 0.60497 | 0.49016 | 1.152 | 0.47398 | 0.49507 | 0.5094  | 0.52708 | 1.152 | 0.53552 | 0.66879 | 0.55949 | 0.57888 | 1.152 | 0.60796 | 0.47751 | 0.4915  |
| 1.156 | 0.50993 | 0.46851 | 0.61172 | 0.4981  | 1.156 | 0.48187 | 0.5027  | 0.51679 | 0.53502 | 1.156 | 0.54393 | 0.67546 | 0.56716 | 0.58642 | 1.156 | 0.61468 | 0.48549 | 0.50009 |
| 1.16  | 0.51802 | 0.47735 | 0.61891 | 0.50604 | 1.16  | 0.49076 | 0.51134 | 0.52471 | 0.54368 | 1.16  | 0.55298 | 0.68287 | 0.57547 | 0.59465 | 1.16  | 0.62217 | 0.49424 | 0.50925 |
| 1.164 | 0.52652 | 0.48585 | 0.62701 | 0.51398 | 1.164 | 0.49931 | 0.51948 | 0.53316 | 0.55235 | 1.164 | 0.56204 | 0.69028 | 0.58315 | 0.60288 | 1.164 | 0.62932 | 0.50299 | 0.51841 |
| 1.168 | 0.53503 | 0.49469 | 0.63421 | 0.52305 | 1.168 | 0.50852 | 0.52812 | 0.54109 | 0.56101 | 1.168 | 0.5711  | 0.69843 | 0.5921  | 0.61111 | 1.168 | 0.63648 | 0.51211 | 0.52757 |
| 1.172 | 0.54311 | 0.50389 | 0.64186 | 0.53156 | 1.172 | 0.51773 | 0.53727 | 0.54954 | 0.5704  | 1.172 | 0.58015 | 0.70658 | 0.60041 | 0.62003 | 1.172 | 0.64407 | 0.52124 | 0.53731 |
| 1.176 | 0.55205 | 0.51345 | 0.64996 | 0.54063 | 1.176 | 0.52694 | 0.54643 | 0.55798 | 0.57978 | 1.176 | 0.58986 | 0.71473 | 0.60936 | 0.62894 | 1.176 | 0.65166 | 0.53074 | 0.54647 |
| 1.18  | 0.56141 | 0.52371 | 0.65851 | 0.54971 | 1.18  | 0.53681 | 0.55609 | 0.56696 | 0.58989 | 1.18  | 0.59956 | 0.72362 | 0.61831 | 0.63855 | 1.18  | 0.65947 | 0.54025 | 0.55678 |
| 1.184 | 0.57162 | 0.53432 | 0.66751 | 0.56048 | 1.184 | 0.548   | 0.56626 | 0.577   | 0.6     | 1.184 | 0.61056 | 0.73325 | 0.62854 | 0.64883 | 1.184 | 0.66815 | 0.55128 | 0.56823 |
| 1.188 | 0.58098 | 0.54459 | 0.67561 | 0.57012 | 1.188 | 0.55819 | 0.57592 | 0.5865  | 0.61011 | 1.188 | 0.62026 | 0.74215 | 0.63749 | 0.65775 | 1.188 | 0.67682 | 0.56117 | 0.57796 |
| 1.192 | 0.59161 | 0.55556 | 0.68505 | 0.58033 | 1.192 | 0.56938 | 0.5866  | 0.59601 | 0.62022 | 1.192 | 0.63126 | 0.75104 | 0.64772 | 0.66804 | 1.192 | 0.6855  | 0.57181 | 0.58884 |
| 1.196 | 0.60267 | 0.56653 | 0.6945  | 0.59111 | 1.196 | 0.58056 | 0.59727 | 0.60657 | 0.63105 | 1.196 | 0.64161 | 0.76067 | 0.65731 | 0.67764 | 1.196 | 0.69418 | 0.58322 | 0.59973 |
| 1.2   | 0.61331 | 0.57785 | 0.70395 | 0.60188 | 1.2   | 0.59208 | 0.60846 | 0.61713 | 0.64188 | 1.2   | 0.65325 | 0.76956 | 0.6669  | 0.68724 | 1.2   | 0.70394 | 0.59463 | 0.61118 |
| 1.204 | 0.62394 | 0.58988 | 0.71295 | 0.61323 | 1.204 | 0.60392 | 0.61965 | 0.62769 | 0.65199 | 1.204 | 0.66425 | 0.77845 | 0.67713 | 0.69753 | 1.204 | 0.71261 | 0.60566 | 0.62206 |
| 1.208 | 0.635   | 0.60156 | 0.7224  | 0.62457 | 1.208 | 0.61609 | 0.63134 | 0.63878 | 0.66354 | 1.208 | 0.67525 | 0.78809 | 0.688   | 0.70782 | 1.208 | 0.72237 | 0.61783 | 0.63408 |
| 1.212 | 0.64649 | 0.6143  | 0.7323  | 0.63591 | 1.212 | 0.62925 | 0.64304 | 0.64987 | 0.67509 | 1.212 | 0.68689 | 0.79772 | 0.69951 | 0.71811 | 1.212 | 0.73213 | 0.63    | 0.64611 |
| 1.216 | 0.65883 | 0.62703 | 0.74219 | 0.64839 | 1.216 | 0.64208 | 0.65524 | 0.66202 | 0.68664 | 1.216 | 0.69854 | 0.80735 | 0.71038 | 0.72908 | 1.216 | 0.74189 | 0.64293 | 0.65871 |
| 1.22  | 0.67074 | 0.64013 | 0.75209 | 0.66086 | 1.22  | 0.65491 | 0.66745 | 0.67417 | 0.69892 | 1.22  | 0.71018 | 0.81624 | 0.72125 | 0.74005 | 1.22  | 0.75165 | 0.65547 | 0.67073 |
| 1.224 | 0.6835  | 0.65428 | 0.76289 | 0.67391 | 1.224 | 0.66873 | 0.68067 | 0.68684 | 0.71119 | 1.224 | 0.72247 | 0.82587 | 0.73275 | 0.75171 | 1.224 | 0.7625  | 0.66916 | 0.6839  |
| 1.228 | 0.69669 | 0.66844 | 0.77324 | 0.68752 | 1.228 | 0.68254 | 0.69338 | 0.70004 | 0.72419 | 1.228 | 0.73477 | 0.83625 | 0.7449  | 0.76269 | 1.228 | 0.77334 | 0.68285 | 0.69822 |
| 1.232 | 0.70987 | 0.6833  | 0.78449 | 0.70113 | 1.232 | 0.69702 | 0.7066  | 0.71324 | 0.73718 | 1.232 | 0.74706 | 0.84588 | 0.75705 | 0.77435 | 1.232 | 0.78419 | 0.69692 | 0.71196 |
| 1.236 | 0.72306 | 0.69781 | 0.79483 | 0.71531 | 1.236 | 0.71149 | 0.71982 | 0.72592 | 0.74946 | 1.236 | 0.75935 | 0.85403 | 0.76856 | 0.78532 | 1.236 | 0.79395 | 0.71061 | 0.72571 |
| 1.24  | 0.73752 | 0.71302 | 0.80608 | 0.72948 | 1.24  | 0.7263  | 0.73406 | 0.74018 | 0.76245 | 1.24  | 0.77229 | 0.86366 | 0.78134 | 0.79767 |       |         |         |         |

|       |          |          |          |          |       |          |          |          |          |       |          |          |          |          |       |          |          |          |
|-------|----------|----------|----------|----------|-------|----------|----------|----------|----------|-------|----------|----------|----------|----------|-------|----------|----------|----------|
| 0.124 | 0.02767  | 0.0275   | 0.04417  | 0.02481  | 0.124 | 0.03027  | 0.05484  | 0.05662  | 0.01525  | 0.124 | 0.06231  | 0.02367  | 0.04066  | 0.01025  | 0.124 | 0.07268  | 0.0081   | 0.03719  |
| 0.128 | 0.0264   | 0.02638  | 0.04371  | 0.02347  | 0.128 | 0.02832  | 0.05251  | 0.05491  | 0.01461  | 0.128 | 0.06065  | 0.02283  | 0.0398   | 0.0096   | 0.128 | 0.07051  | 0.00735  | 0.03562  |
| 0.132 | 0.02518  | 0.02517  | 0.0421   | 0.0222   | 0.132 | 0.02604  | 0.05056  | 0.05321  | 0.01396  | 0.132 | 0.05876  | 0.02198  | 0.0386   | 0.00883  | 0.132 | 0.06834  | 0.00645  | 0.0342   |
| 0.136 | 0.02409  | 0.02393  | 0.04141  | 0.02122  | 0.136 | 0.02409  | 0.04862  | 0.05116  | 0.01348  | 0.136 | 0.0571   | 0.02096  | 0.03753  | 0.00814  | 0.136 | 0.06602  | 0.00582  | 0.03267  |
| 0.14  | 0.02268  | 0.02272  | 0.04026  | 0.02001  | 0.14  | 0.02246  | 0.0459   | 0.04911  | 0.01295  | 0.14  | 0.05499  | 0.0199   | 0.03646  | 0.00755  | 0.14  | 0.06356  | 0.00529  | 0.0313   |
| 0.144 | 0.0215   | 0.02157  | 0.03911  | 0.0189   | 0.144 | 0.02051  | 0.04395  | 0.04707  | 0.01241  | 0.144 | 0.05304  | 0.01924  | 0.03533  | 0.00701  | 0.144 | 0.06095  | 0.00467  | 0.02983  |
| 0.148 | 0.02005  | 0.02042  | 0.0375   | 0.01773  | 0.148 | 0.01888  | 0.04162  | 0.04536  | 0.01161  | 0.148 | 0.05144  | 0.01839  | 0.03419  | 0.00646  | 0.148 | 0.05835  | 0.00411  | 0.02826  |
| 0.152 | 0.01863  | 0.01906  | 0.03635  | 0.01671  | 0.152 | 0.01725  | 0.03928  | 0.04366  | 0.01118  | 0.152 | 0.04949  | 0.01784  | 0.03298  | 0.0058   | 0.152 | 0.0556   | 0.00327  | 0.02674  |
| 0.156 | 0.01741  | 0.01779  | 0.03451  | 0.01573  | 0.156 | 0.01563  | 0.03695  | 0.04161  | 0.0107   | 0.156 | 0.04761  | 0.01704  | 0.03199  | 0.00525  | 0.156 | 0.05357  | 0.00293  | 0.02527  |
| 0.16  | 0.01605  | 0.01679  | 0.03359  | 0.01459  | 0.16  | 0.01432  | 0.03501  | 0.0399   | 0.01027  | 0.16  | 0.04566  | 0.01649  | 0.03085  | 0.00471  | 0.16  | 0.05096  | 0.00249  | 0.02394  |
| 0.164 | 0.01478  | 0.01549  | 0.03244  | 0.01338  | 0.164 | 0.0127   | 0.03267  | 0.03786  | 0.00952  | 0.164 | 0.04371  | 0.01594  | 0.02971  | 0.00412  | 0.164 | 0.04836  | 0.00184  | 0.02262  |
| 0.168 | 0.01332  | 0.01425  | 0.03129  | 0.01237  | 0.168 | 0.01139  | 0.02995  | 0.03581  | 0.00915  | 0.168 | 0.04171  | 0.01491  | 0.02836  | 0.00361  | 0.168 | 0.04575  | 0.00146  | 0.0211   |
| 0.172 | 0.012    | 0.01331  | 0.02991  | 0.01116  | 0.172 | 0.01042  | 0.02762  | 0.03411  | 0.00867  | 0.172 | 0.03971  | 0.01458  | 0.02715  | 0.0031   | 0.172 | 0.04329  | 0.00112  | 0.01987  |
| 0.176 | 0.01073  | 0.0121   | 0.0283   | 0.01012  | 0.176 | 0.00879  | 0.02567  | 0.0324   | 0.00808  | 0.176 | 0.03748  | 0.01403  | 0.02609  | 0.00263  | 0.176 | 0.04083  | 9.34E-04 | 0.01835  |
| 0.18  | 0.00946  | 0.01101  | 0.02669  | 0.00927  | 0.18  | 0.00749  | 0.02373  | 0.03035  | 0.0076   | 0.18  | 0.03576  | 0.01345  | 0.02474  | 0.00226  | 0.18  | 0.03808  | 4.36E-04 | 0.01693  |
| 0.184 | 0.00805  | 0.0098   | 0.02553  | 0.00829  | 0.184 | 0.00651  | 0.02178  | 0.02831  | 0.00738  | 0.184 | 0.03376  | 0.01282  | 0.02338  | 0.00182  | 0.184 | 0.03576  | 2.80E-04 | 0.0156   |
| 0.188 | 0.00701  | 0.0088   | 0.02369  | 0.00728  | 0.188 | 0.00553  | 0.01945  | 0.0266   | 0.0069   | 0.188 | 0.03193  | 0.01205  | 0.02239  | 0.00157  | 0.188 | 0.03344  | 1.87E-04 | 0.01457  |
| 0.192 | 0.00588  | 0.00778  | 0.02231  | 0.00646  | 0.192 | 0.00456  | 0.01789  | 0.0249   | 0.00647  | 0.192 | 0.02993  | 0.01158  | 0.02097  | 0.0012   | 0.192 | 0.03098  | 1.87E-04 | 0.0133   |
| 0.196 | 0.00475  | 0.00666  | 0.02093  | 0.00542  | 0.196 | 0.00358  | 0.01556  | 0.02319  | 0.0061   | 0.196 | 0.02809  | 0.01081  | 0.0199   | 9.85E-04 | 0.196 | 0.02838  | 0        | 0.01182  |
| 0.2   | 0.00386  | 0.00572  | 0.01932  | 0.0047   | 0.2   | 0.0026   | 0.014    | 0.02149  | 0.00567  | 0.2   | 0.02598  | 0.01026  | 0.01862  | 7.66E-04 | 0.2   | 0.02621  | 1.56E-04 | 0.0107   |
| 0.204 | 0.00315  | 0.00508  | 0.01771  | 0.00382  | 0.204 | 0.00195  | 0.01245  | 0.02012  | 0.00546  | 0.204 | 0.02443  | 0.0096   | 0.01734  | 6.57E-04 | 0.204 | 0.02403  | 5.92E-04 | 0.00947  |
| 0.208 | 0.00231  | 0.00402  | 0.01587  | 0.0032   | 0.208 | 0.00163  | 0.0105   | 0.01842  | 0.00498  | 0.208 | 0.02254  | 0.00879  | 0.01621  | 4.01E-04 | 0.208 | 0.02157  | 7.48E-04 | 0.00819  |
| 0.212 | 0.00184  | 0.00318  | 0.01426  | 0.00225  | 0.212 | 9.77E-04 | 0.00933  | 0.01637  | 0.0046   | 0.212 | 0.02048  | 0.00806  | 0.01486  | 2.55E-04 | 0.212 | 0.01911  | 0.00121  | 0.00702  |
| 0.216 | 0.00113  | 0.00236  | 0.01265  | 0.00176  | 0.216 | 6.51E-04 | 0.00778  | 0.01501  | 0.00412  | 0.216 | 0.01888  | 0.00751  | 0.0135   | 3.65E-05 | 0.216 | 0.01723  | 0.00178  | 0.00584  |
| 0.22  | 8.94E-04 | 0.00169  | 0.01081  | 0.00114  | 0.22  | 3.26E-04 | 0.00661  | 0.01296  | 0.0038   | 0.22  | 0.01722  | 0.00693  | 0.01237  | 0        | 0.22  | 0.01506  | 0.00249  | 0.00486  |
| 0.224 | 5.18E-04 | 0.00124  | 0.00943  | 7.18E-04 | 0.224 | 0        | 0.00545  | 0.01126  | 0.00353  | 0.224 | 0.01539  | 0.00623  | 0.01116  | 7.30E-05 | 0.224 | 0.01303  | 0.0034   | 0.00388  |
| 0.228 | 1.88E-04 | 7.56E-04 | 0.00736  | 1.63E-04 | 0.228 | 0        | 0.00428  | 0.00989  | 0.00294  | 0.228 | 0.01356  | 0.00546  | 0.00988  | 7.30E-05 | 0.228 | 0.01086  | 0.00445  | 0.00289  |
| 0.232 | 0        | 2.72E-04 | 0.00575  | 6.53E-05 | 0.232 | 3.26E-04 | 0.00311  | 0.00853  | 0.00262  | 0.232 | 0.01219  | 0.0048   | 0.00888  | 2.92E-04 | 0.232 | 0.00927  | 0.00582  | 0.00221  |
| 0.236 | 1.41E-04 | 6.05E-05 | 0.00437  | 0        | 0.236 | 9.77E-04 | 0.00272  | 0.00682  | 0.00219  | 0.236 | 0.0107   | 0.00414  | 0.00761  | 5.11E-04 | 0.236 | 0.00767  | 0.00732  | 0.00147  |
| 0.24  | 4.71E-05 | 0        | 0.00299  | 1.96E-04 | 0.24  | 0.00163  | 0.00194  | 0.0058   | 0.00182  | 0.24  | 0.00921  | 0.00333  | 0.00654  | 8.03E-04 | 0.24  | 0.00594  | 0.00894  | 8.34E-04 |
| 0.244 | 4.71E-04 | 9.08E-05 | 0.00184  | 5.88E-04 | 0.244 | 0.0026   | 7.78E-04 | 0.00409  | 0.00155  | 0.244 | 0.00755  | 0.00282  | 0.00547  | 0.00117  | 0.244 | 0.00434  | 0.01087  | 4.91E-04 |
| 0.248 | 6.12E-04 | 3.63E-04 | 9.20E-04 | 0.00108  | 0.248 | 0.00391  | 3.89E-04 | 0.00307  | 0.00102  | 0.248 | 0.00618  | 0.00216  | 0.00426  | 0.00161  | 0.248 | 0.00492  | 0.01314  | 2.45E-04 |
| 0.252 | 0.00118  | 9.98E-04 | 4.60E-04 | 0.00196  | 0.252 | 0.00586  | 0        | 0.00205  | 8.02E-04 | 0.252 | 0.00492  | 0.00172  | 0.00334  | 0.00237  | 0.252 | 0.00217  | 0.0157   | 0        |
| 0.256 | 0.0016   | 0.00203  | 0        | 0.00304  | 0.256 | 0.00781  | 0        | 0.00136  | 5.35E-04 | 0.256 | 0.00372  | 0.00128  | 0.0027   | 0.00314  | 0.256 | 0.00145  | 0.01859  | 2.94E-04 |
| 0.26  | 0.00259  | 0.00303  | 0        | 0.00424  | 0.26  | 0.01042  | 0        | 6.82E-04 | 1.60E-04 | 0.26  | 0.00269  | 6.60E-04 | 0.00185  | 0.00405  | 0.26  | 5.79E-04 | 0.02196  | 4.42E-04 |
| 0.264 | 0.00348  | 0.00472  | 4.60E-04 | 0.00604  | 0.264 | 0.01367  | 3.89E-04 | 0        | 0        | 0.264 | 0.00189  | 5.50E-04 | 0.00121  | 0.00533  | 0.264 | 2.90E-04 | 0.02566  | 0.00128  |
| 0.268 | 0.00489  | 0.00705  | 0.00138  | 0.00819  | 0.268 | 0.01758  | 3.89E-04 | 0        | 1.07E-04 | 0.268 | 9.73E-04 | 2.93E-04 | 6.40E-04 | 0.00675  | 0.268 | 0        | 0.02999  | 0.00226  |
| 0.272 | 0.0064   | 0.00968  | 0.00299  | 0.01084  | 0.272 | 0.02181  | 0.00117  | 0        | 5.35E-05 | 0.272 | 5.15E-04 | 1.10E-04 | 2.84E-04 | 0.00839  | 0.272 | 0        | 0.03479  | 0.00353  |
| 0.276 | 0.00856  | 0.01298  | 0.00575  | 0.01374  | 0.276 | 0.02669  | 0.00194  | 6.82E-04 | 2.14E-04 | 0.276 | 0        | 0        | 7.11E-05 | 0.01014  | 0.276 | 4.34E-04 | 0.04037  | 0.00535  |
| 0.28  | 0.01078  | 0.01697  | 0.0092   | 0.01737  | 0.28  | 0.03223  | 0.00311  | 0.00136  | 5.35E-04 | 0.28  | 5.72E-05 | 2.20E-04 | 0        | 0.01241  | 0.28  | 4.34E-04 | 0.0466   | 0.00731  |
| 0.284 | 0.01374  | 0.0219   | 0.0138   | 0.02164  | 0.284 | 0.03906  | 0.00467  | 0.00273  | 0.00112  | 0.284 | 5.15E-04 | 5.50E-04 | 2.13E-04 | 0.01496  | 0.284 | 0.00101  | 0.05376  | 0.0102   |
| 0.288 | 0.01694  | 0.02756  | 0.01978  | 0.02631  | 0.288 | 0.04622  | 0.007    | 0.00443  | 0.00187  | 0.288 | 0.00114  | 5.86E-04 | 7.82E-04 | 0.01795  | 0.288 | 0.00174  | 0.06217  | 0.01354  |
| 0.292 | 0.02113  | 0.03422  | 0.02738  | 0.03206  | 0.292 | 0.05436  | 0.00933  | 0.00682  | 0.00267  | 0.292 | 0.002    | 0.00114  | 0.00149  | 0.02127  | 0.292 | 0.0029   | 0.07151  | 0.01751  |
| 0.296 | 0.02579  | 0.04199  | 0.03681  | 0.03842  | 0.296 | 0.06315  | 0.01206  | 0.00955  | 0.00417  | 0.296 | 0.00349  | 0.00183  | 0.00249  | 0.02499  | 0.296 | 0.0042   | 0.08179  | 0.02203  |
| 0.3   | 0.0312   | 0.05098  | 0.04854  | 0.0458   | 0.3   | 0.07324  | 0.01556  | 0.0133   | 0.00572  | 0.3   | 0.00532  | 0.00326  | 0.0037   | 0.02937  | 0.3   | 0.00565  | 0.09363  | 0.02723  |
| 0.304 | 0.0375   | 0.06111  | 0.06188  | 0.05396  | 0.304 | 0.08398  | 0.01984  | 0.01739  | 0.00765  | 0.304 | 0.00801  | 0.00451  | 0.00533  | 0.03415  | 0.304 | 0.00724  | 0.10671  | 0.03331  |
| 0.308 | 0.04428  | 0.0724   | 0.07706  | 0.06343  | 0.308 | 0.0957   | 0.02412  | 0.02217  | 0.00984  | 0.308 | 0.01093  | 0.00634  | 0.00718  | 0.03952  | 0.308 | 0.00927  | 0.12073  | 0.03998  |
| 0.312 | 0.05186  | 0.0845   | 0.09478  | 0.07355  | 0.312 | 0.1084   | 0.02878  | 0.02763  | 0.01273  | 0.312 | 0.01453  | 0.0085   | 0.0096   | 0.04543  | 0.312 | 0.01129  | 0.13568  | 0.04739  |
| 0.316 | 0.06047  | 0.09812  | 0.11502  | 0.08497  | 0.316 | 0.12174  | 0.03462  | 0.03411  | 0.01594  | 0.316 | 0.01877  | 0.01114  | 0.01251  | 0.05214  | 0.316 | 0.01433  | 0.15187  | 0.05608  |
| 0.32  | 0.0695   | 0.11233  | 0.13757  | 0.09705  | 0.32  | 0.13607  | 0.04123  | 0.04093  | 0.01958  | 0.32  | 0.02375  | 0.01392  | 0.01535  | 0.05947  | 0.32  | 0.01752  | 0.16869  | 0.06481  |
| 0.324 | 0.07929  | 0.12716  | 0.16195  | 0.11011  | 0.324 | 0.15039  | 0.04784  | 0.04809  | 0.02349  | 0.324 | 0.02918  | 0.01733  | 0.01876  | 0.06739  | 0.324 | 0.02056  | 0.18582  | 0.07442  |
| 0.328 | 0.08978  | 0.14289  | 0.18841  | 0.12415  | 0.328 | 0.16602  | 0.05562  | 0.05593  | 0.02809  | 0.328 | 0.03548  | 0.02096  | 0.02267  | 0.07622  | 0.328 | 0.02447  | 0.20326  | 0.08453  |
| 0.332 | 0.10047  | 0.15832  | 0.21532  | 0.13884  | 0.332 | 0.18164  | 0.06301  | 0.06378  | 0.03312  | 0.332 | 0.04217  | 0.02514  | 0.02729  | 0.08564  | 0.332 | 0.02881  | 0.22071  | 0.09528  |
| 0.336 | 0.11138  | 0.17436  | 0.24362  | 0.15418  | 0.336 | 0.19759  | 0.07157  | 0.07196  | 0.03868  | 0.336 | 0.04938  | 0.02983  | 0.03191  | 0.09592  | 0.336 | 0.03301  | 0.23784  | 0.10636  |
| 0.34  | 0.1223   | 0.18979  | 0.27214  | 0.16952  | 0.34  | 0.21322  | 0.07974  | 0.08049  | 0.04478  | 0.34  | 0.05699  | 0.03514  | 0.0371   | 0.10705  | 0.34  | 0.03793  | 0.25434  | 0.11789  |
| 0.344 | 0.13322  | 0.20491  | 0.29952  | 0.18519  | 0.344 | 0.22884  | 0.08829  | 0.08902  | 0.05136  | 0.344 | 0.06511  | 0.04078  | 0.04265  | 0.11898  | 0.344 | 0.04242  | 0.27023  | 0.12913  |



|       |         |         |         |         |       |         |         |         |         |       |         |         |         |         |       |         |         |         |
|-------|---------|---------|---------|---------|-------|---------|---------|---------|---------|-------|---------|---------|---------|---------|-------|---------|---------|---------|
| 0.536 | 0.17731 | 0.21036 | 0.43432 | 0.18944 | 0.536 | 0.17611 | 0.12019 | 0.10675 | 0.10673 | 0.536 | 0.11358 | 0.07874 | 0.25581 | 0.26989 | 0.536 | 0.17895 | 0.2369  | 0.24643 |
| 0.54  | 0.17486 | 0.20945 | 0.42995 | 0.19042 | 0.54  | 0.17546 | 0.11902 | 0.10539 | 0.10737 | 0.54  | 0.11089 | 0.07823 | 0.25638 | 0.27135 | 0.54  | 0.17924 | 0.2369  | 0.24594 |
| 0.544 | 0.17317 | 0.20945 | 0.42719 | 0.19303 | 0.544 | 0.17578 | 0.11824 | 0.10505 | 0.10834 | 0.544 | 0.10877 | 0.07804 | 0.25766 | 0.27354 | 0.544 | 0.1804  | 0.23721 | 0.24594 |
| 0.548 | 0.17176 | 0.21006 | 0.42535 | 0.19597 | 0.548 | 0.17676 | 0.11824 | 0.10471 | 0.10962 | 0.548 | 0.1074  | 0.0779  | 0.25972 | 0.27573 | 0.548 | 0.18127 | 0.23815 | 0.24692 |
| 0.552 | 0.17143 | 0.21127 | 0.42512 | 0.19956 | 0.552 | 0.17839 | 0.11902 | 0.10539 | 0.11106 | 0.552 | 0.10654 | 0.07845 | 0.26228 | 0.27865 | 0.552 | 0.183   | 0.23971 | 0.24888 |
| 0.556 | 0.17162 | 0.21338 | 0.42581 | 0.20445 | 0.556 | 0.18099 | 0.12058 | 0.10607 | 0.11272 | 0.556 | 0.10631 | 0.07911 | 0.26576 | 0.28194 | 0.556 | 0.18517 | 0.24189 | 0.25134 |
| 0.56  | 0.17223 | 0.2158  | 0.42742 | 0.20935 | 0.56  | 0.18424 | 0.12213 | 0.10778 | 0.11459 | 0.56  | 0.10631 | 0.07991 | 0.26967 | 0.28558 | 0.56  | 0.18706 | 0.24407 | 0.25379 |
| 0.564 | 0.17331 | 0.21853 | 0.42949 | 0.2149  | 0.564 | 0.18783 | 0.12408 | 0.10914 | 0.11647 | 0.564 | 0.10671 | 0.0809  | 0.27422 | 0.2896  | 0.564 | 0.18966 | 0.24656 | 0.25673 |
| 0.568 | 0.17444 | 0.22186 | 0.43179 | 0.22045 | 0.568 | 0.19173 | 0.1268  | 0.11119 | 0.11845 | 0.568 | 0.10757 | 0.08204 | 0.2787  | 0.29361 | 0.568 | 0.19241 | 0.24936 | 0.26017 |
| 0.572 | 0.17594 | 0.22549 | 0.4357  | 0.22665 | 0.572 | 0.19629 | 0.12952 | 0.11357 | 0.12059 | 0.572 | 0.10894 | 0.08336 | 0.28382 | 0.29835 | 0.572 | 0.19589 | 0.25248 | 0.26409 |
| 0.576 | 0.17778 | 0.22912 | 0.43892 | 0.23285 | 0.576 | 0.20052 | 0.13224 | 0.11596 | 0.1231  | 0.576 | 0.11037 | 0.08468 | 0.28915 | 0.3031  | 0.576 | 0.19907 | 0.25559 | 0.26802 |
| 0.58  | 0.17971 | 0.23275 | 0.44214 | 0.23873 | 0.58  | 0.20508 | 0.13497 | 0.11801 | 0.12535 | 0.58  | 0.1118  | 0.08611 | 0.29448 | 0.30748 | 0.58  | 0.2024  | 0.25839 | 0.27194 |
| 0.584 | 0.18183 | 0.23668 | 0.44651 | 0.24461 | 0.584 | 0.20996 | 0.13847 | 0.12108 | 0.12781 | 0.584 | 0.11392 | 0.08768 | 0.30038 | 0.31258 | 0.584 | 0.20617 | 0.26182 | 0.27587 |
| 0.588 | 0.18413 | 0.24031 | 0.45043 | 0.25048 | 0.588 | 0.21484 | 0.14236 | 0.12347 | 0.13048 | 0.588 | 0.11575 | 0.089   | 0.30656 | 0.31733 | 0.588 | 0.21008 | 0.26493 | 0.28028 |
| 0.592 | 0.18653 | 0.24424 | 0.45411 | 0.2557  | 0.592 | 0.2194  | 0.14508 | 0.12585 | 0.13305 | 0.592 | 0.11781 | 0.09072 | 0.3126  | 0.32244 | 0.592 | 0.21428 | 0.26774 | 0.28421 |
| 0.596 | 0.18879 | 0.24818 | 0.45756 | 0.26125 | 0.596 | 0.22396 | 0.14858 | 0.12858 | 0.13573 | 0.596 | 0.11999 | 0.0923  | 0.319   | 0.32718 | 0.596 | 0.21847 | 0.27085 | 0.28813 |
| 0.6   | 0.19119 | 0.25181 | 0.46101 | 0.26582 | 0.6   | 0.22819 | 0.15169 | 0.13097 | 0.13851 | 0.6   | 0.12227 | 0.09391 | 0.32547 | 0.33192 | 0.6   | 0.22267 | 0.27366 | 0.29206 |
| 0.604 | 0.19354 | 0.25544 | 0.46446 | 0.27039 | 0.604 | 0.23275 | 0.15519 | 0.13404 | 0.14124 | 0.604 | 0.12462 | 0.0956  | 0.33201 | 0.33703 | 0.604 | 0.22687 | 0.27646 | 0.29549 |
| 0.608 | 0.19613 | 0.25877 | 0.46791 | 0.27464 | 0.608 | 0.23698 | 0.15869 | 0.13677 | 0.14413 | 0.608 | 0.12714 | 0.09717 | 0.33869 | 0.34177 | 0.608 | 0.23121 | 0.27895 | 0.29893 |
| 0.612 | 0.1983  | 0.26209 | 0.47044 | 0.27823 | 0.612 | 0.24056 | 0.1618  | 0.1395  | 0.1468  | 0.612 | 0.12931 | 0.099   | 0.34516 | 0.34615 | 0.612 | 0.23527 | 0.28144 | 0.30187 |
| 0.616 | 0.2007  | 0.26512 | 0.47343 | 0.28182 | 0.616 | 0.24414 | 0.16453 | 0.14188 | 0.1498  | 0.616 | 0.13154 | 0.10084 | 0.3517  | 0.35053 | 0.616 | 0.23976 | 0.28362 | 0.30481 |
| 0.62  | 0.20291 | 0.26845 | 0.47619 | 0.28508 | 0.62  | 0.2474  | 0.16764 | 0.14461 | 0.15269 | 0.62  | 0.13389 | 0.1023  | 0.35816 | 0.35454 | 0.62  | 0.2441  | 0.2858  | 0.30727 |
| 0.624 | 0.20512 | 0.27117 | 0.47826 | 0.2877  | 0.624 | 0.25065 | 0.17075 | 0.147   | 0.15574 | 0.624 | 0.13629 | 0.10413 | 0.3647  | 0.35856 | 0.624 | 0.24844 | 0.28798 | 0.30972 |
| 0.628 | 0.20728 | 0.27389 | 0.48056 | 0.29031 | 0.628 | 0.25326 | 0.17347 | 0.14973 | 0.15841 | 0.628 | 0.13858 | 0.1056  | 0.37096 | 0.36257 | 0.628 | 0.25264 | 0.28985 | 0.31168 |
| 0.632 | 0.20945 | 0.27662 | 0.4824  | 0.29227 | 0.632 | 0.25553 | 0.17581 | 0.15211 | 0.1613  | 0.632 | 0.14081 | 0.10743 | 0.37721 | 0.36622 | 0.632 | 0.25713 | 0.29172 | 0.31364 |
| 0.636 | 0.21152 | 0.27934 | 0.48401 | 0.29423 | 0.636 | 0.25814 | 0.17892 | 0.15484 | 0.16408 | 0.636 | 0.14333 | 0.10926 | 0.3834  | 0.3695  | 0.636 | 0.26162 | 0.29359 | 0.31561 |
| 0.64  | 0.21359 | 0.28176 | 0.48562 | 0.29618 | 0.64  | 0.26074 | 0.18164 | 0.15757 | 0.16697 | 0.64  | 0.14585 | 0.11109 | 0.38937 | 0.37315 | 0.64  | 0.26567 | 0.29546 | 0.31708 |
| 0.644 | 0.21561 | 0.28388 | 0.48677 | 0.29716 | 0.644 | 0.26237 | 0.18398 | 0.15996 | 0.16964 | 0.644 | 0.14808 | 0.11329 | 0.39512 | 0.37607 | 0.644 | 0.26944 | 0.2967  | 0.31806 |
| 0.648 | 0.21783 | 0.2863  | 0.48815 | 0.2988  | 0.648 | 0.26465 | 0.18631 | 0.16269 | 0.17221 | 0.648 | 0.15048 | 0.11549 | 0.40074 | 0.37899 | 0.648 | 0.2732  | 0.29857 | 0.31953 |
| 0.652 | 0.2199  | 0.28872 | 0.48838 | 0.29977 | 0.652 | 0.2666  | 0.18903 | 0.16542 | 0.17478 | 0.652 | 0.153   | 0.11696 | 0.4065  | 0.38191 | 0.652 | 0.27711 | 0.30013 | 0.32051 |
| 0.656 | 0.2222  | 0.29084 | 0.48953 | 0.30075 | 0.656 | 0.26823 | 0.19137 | 0.16814 | 0.17719 | 0.656 | 0.15546 | 0.11879 | 0.41183 | 0.38483 | 0.656 | 0.28073 | 0.302   | 0.32149 |
| 0.66  | 0.22432 | 0.29265 | 0.48976 | 0.30141 | 0.66  | 0.26953 | 0.1937  | 0.17053 | 0.17938 | 0.66  | 0.15815 | 0.12026 | 0.41695 | 0.38702 | 0.66  | 0.28406 | 0.30356 | 0.32247 |
| 0.664 | 0.22653 | 0.29477 | 0.49068 | 0.30239 | 0.664 | 0.27116 | 0.19564 | 0.17326 | 0.18147 | 0.664 | 0.16055 | 0.12172 | 0.42213 | 0.38957 | 0.664 | 0.28768 | 0.30511 | 0.32395 |
| 0.668 | 0.22884 | 0.29719 | 0.4916  | 0.30304 | 0.668 | 0.27279 | 0.19837 | 0.17633 | 0.18366 | 0.668 | 0.1633  | 0.12319 | 0.42675 | 0.39176 | 0.668 | 0.29115 | 0.30667 | 0.32493 |
| 0.672 | 0.23142 | 0.29961 | 0.49229 | 0.30402 | 0.672 | 0.27441 | 0.20109 | 0.1794  | 0.1858  | 0.672 | 0.16588 | 0.12502 | 0.4318  | 0.39432 | 0.672 | 0.29477 | 0.30885 | 0.3264  |
| 0.676 | 0.23401 | 0.30142 | 0.49229 | 0.30467 | 0.676 | 0.27604 | 0.20303 | 0.18179 | 0.18751 | 0.676 | 0.16839 | 0.12648 | 0.43663 | 0.3965  | 0.676 | 0.29752 | 0.31041 | 0.32738 |
| 0.68  | 0.23637 | 0.30354 | 0.49298 | 0.30565 | 0.68  | 0.27767 | 0.20576 | 0.18486 | 0.18949 | 0.68  | 0.17091 | 0.12795 | 0.44118 | 0.39869 | 0.68  | 0.30042 | 0.31259 | 0.32934 |
| 0.684 | 0.23909 | 0.30596 | 0.49344 | 0.3063  | 0.684 | 0.27897 | 0.20809 | 0.18793 | 0.1912  | 0.684 | 0.17366 | 0.12978 | 0.44538 | 0.40052 | 0.684 | 0.30361 | 0.31477 | 0.33032 |
| 0.688 | 0.24206 | 0.30838 | 0.49413 | 0.30761 | 0.688 | 0.28092 | 0.21081 | 0.19065 | 0.19286 | 0.688 | 0.17657 | 0.13125 | 0.44964 | 0.40271 | 0.688 | 0.30621 | 0.31695 | 0.33229 |
| 0.692 | 0.24521 | 0.3108  | 0.49413 | 0.30892 | 0.692 | 0.28255 | 0.21315 | 0.19372 | 0.19458 | 0.692 | 0.17932 | 0.13308 | 0.45348 | 0.40453 | 0.692 | 0.30896 | 0.31913 | 0.33425 |
| 0.696 | 0.24804 | 0.31322 | 0.49505 | 0.31022 | 0.696 | 0.28451 | 0.21626 | 0.19714 | 0.19629 | 0.696 | 0.18195 | 0.13491 | 0.45732 | 0.40672 | 0.696 | 0.31171 | 0.32162 | 0.3367  |
| 0.7   | 0.25133 | 0.31595 | 0.49597 | 0.31185 | 0.7   | 0.28678 | 0.21898 | 0.2002  | 0.19827 | 0.7   | 0.1847  | 0.13674 | 0.4613  | 0.40855 | 0.7   | 0.31432 | 0.32474 | 0.33965 |
| 0.704 | 0.25462 | 0.31897 | 0.49689 | 0.31381 | 0.704 | 0.28906 | 0.22209 | 0.20396 | 0.20003 | 0.704 | 0.18773 | 0.13894 | 0.46507 | 0.41073 | 0.704 | 0.31692 | 0.32785 | 0.34259 |
| 0.708 | 0.25839 | 0.3217  | 0.49781 | 0.31577 | 0.708 | 0.29167 | 0.22482 | 0.20771 | 0.20185 | 0.708 | 0.19048 | 0.14151 | 0.46841 | 0.41256 | 0.708 | 0.31895 | 0.33097 | 0.34553 |
| 0.712 | 0.26262 | 0.32502 | 0.49965 | 0.31838 | 0.712 | 0.2946  | 0.22832 | 0.21146 | 0.2041  | 0.712 | 0.19328 | 0.14407 | 0.4721  | 0.41511 | 0.712 | 0.32156 | 0.3347  | 0.34946 |
| 0.716 | 0.26639 | 0.32835 | 0.50127 | 0.32132 | 0.716 | 0.29785 | 0.23182 | 0.21555 | 0.20618 | 0.716 | 0.19603 | 0.147   | 0.47558 | 0.4173  | 0.716 | 0.32373 | 0.33875 | 0.35387 |
| 0.72  | 0.27062 | 0.33198 | 0.50311 | 0.32426 | 0.72  | 0.30111 | 0.23532 | 0.21999 | 0.20854 | 0.72  | 0.19912 | 0.1503  | 0.47885 | 0.41986 | 0.72  | 0.32634 | 0.3428  | 0.35829 |
| 0.724 | 0.27533 | 0.33531 | 0.50495 | 0.32752 | 0.724 | 0.30469 | 0.2396  | 0.22408 | 0.21089 | 0.724 | 0.20227 | 0.1536  | 0.48198 | 0.42241 | 0.724 | 0.32836 | 0.34747 | 0.36319 |
| 0.728 | 0.28003 | 0.33955 | 0.50725 | 0.33144 | 0.728 | 0.30859 | 0.24387 | 0.22885 | 0.21362 | 0.728 | 0.20558 | 0.15763 | 0.48525 | 0.42496 | 0.728 | 0.33068 | 0.35246 | 0.36859 |
| 0.732 | 0.28474 | 0.34348 | 0.50978 | 0.33568 | 0.732 | 0.31315 | 0.24854 | 0.23363 | 0.2164  | 0.732 | 0.2089  | 0.16203 | 0.48859 | 0.42825 | 0.732 | 0.33314 | 0.35775 | 0.37448 |
| 0.736 | 0.28992 | 0.34802 | 0.51277 | 0.34025 | 0.736 | 0.31803 | 0.2536  | 0.23874 | 0.21961 | 0.736 | 0.21245 | 0.16679 | 0.49207 | 0.43117 | 0.736 | 0.33546 | 0.36367 | 0.38086 |
| 0.74  | 0.29509 | 0.35255 | 0.5153  | 0.34482 | 0.74  | 0.32292 | 0.25865 | 0.24318 | 0.22266 | 0.74  | 0.21628 | 0.17155 | 0.4952  | 0.43445 | 0.74  | 0.33806 | 0.36959 | 0.38674 |
| 0.744 | 0.30074 | 0.35709 | 0.51852 | 0.35037 | 0.744 | 0.32845 | 0.2641  | 0.24829 | 0.22641 | 0.744 | 0.22    | 0.17741 | 0.49854 | 0.4381  | 0.744 | 0.34081 | 0.37582 | 0.39361 |
| 0.748 | 0.30592 | 0.36224 | 0.52174 | 0.35592 | 0.748 | 0.33398 | 0.27032 | 0.25341 | 0.23031 | 0.748 | 0.22424 | 0.18328 | 0.50195 | 0.44211 | 0.748 | 0.34342 | 0.38267 | 0.40097 |
| 0.752 | 0.31156 | 0.36738 | 0.52519 | 0.3618  | 0.752 | 0.34017 | 0.27577 | 0.25853 | 0.23454 | 0.752 | 0.22853 | 0.18951 | 0.50515 | 0.44613 | 0.752 | 0.34646 | 0.38983 | 0.40882 |
| 0.756 | 0.31721 | 0.37222 | 0.52841 | 0.36735 | 0.756 | 0.34635 | 0.2816  | 0.2633  | 0.23877 | 0.756 | 0.23265 | 0.1961  | 0.50871 | 0.45051 | 0.756 | 0.34    |         |         |

|       |         |         |         |         |       |         |         |         |         |       |         |         |         |         |       |         |         |         |
|-------|---------|---------|---------|---------|-------|---------|---------|---------|---------|-------|---------|---------|---------|---------|-------|---------|---------|---------|
| 0.948 | 0.41038 | 0.46208 | 0.4801  | 0.4803  | 0.948 | 0.46289 | 0.41346 | 0.38677 | 0.34229 | 0.948 | 0.35    | 0.36611 | 0.58277 | 0.54975 | 0.948 | 0.51585 | 0.52127 | 0.47849 |
| 0.952 | 0.41226 | 0.4645  | 0.48148 | 0.48585 | 0.952 | 0.46712 | 0.41696 | 0.39052 | 0.34614 | 0.952 | 0.35286 | 0.37088 | 0.58348 | 0.5534  | 0.952 | 0.51759 | 0.52626 | 0.48143 |
| 0.956 | 0.41415 | 0.46692 | 0.48332 | 0.4914  | 0.956 | 0.47103 | 0.42163 | 0.39427 | 0.35047 | 0.956 | 0.35572 | 0.37564 | 0.5849  | 0.55778 | 0.956 | 0.52005 | 0.53124 | 0.48437 |
| 0.96  | 0.41556 | 0.46903 | 0.48562 | 0.49727 | 0.96  | 0.47559 | 0.4259  | 0.3987  | 0.35459 | 0.96  | 0.35916 | 0.38077 | 0.58632 | 0.56179 | 0.96  | 0.52251 | 0.53654 | 0.48683 |
| 0.964 | 0.4165  | 0.47145 | 0.48746 | 0.50348 | 0.964 | 0.48014 | 0.43018 | 0.4028  | 0.35898 | 0.964 | 0.36202 | 0.3859  | 0.58775 | 0.56653 | 0.964 | 0.5244  | 0.54121 | 0.48977 |
| 0.968 | 0.41744 | 0.47327 | 0.49045 | 0.50968 | 0.968 | 0.48535 | 0.43524 | 0.40791 | 0.36379 | 0.968 | 0.36545 | 0.39176 | 0.58917 | 0.57128 | 0.968 | 0.52686 | 0.54619 | 0.49222 |
| 0.972 | 0.41791 | 0.47539 | 0.49321 | 0.51653 | 0.972 | 0.49056 | 0.4403  | 0.41269 | 0.36871 | 0.972 | 0.36888 | 0.39726 | 0.5913  | 0.57675 | 0.972 | 0.52903 | 0.55149 | 0.49517 |
| 0.976 | 0.41885 | 0.47751 | 0.49643 | 0.52339 | 0.976 | 0.49609 | 0.44574 | 0.4178  | 0.37374 | 0.976 | 0.37289 | 0.40349 | 0.59343 | 0.58222 | 0.976 | 0.53192 | 0.55678 | 0.49762 |
| 0.98  | 0.41932 | 0.47962 | 0.50012 | 0.5309  | 0.98  | 0.50163 | 0.45158 | 0.42394 | 0.37866 | 0.98  | 0.37632 | 0.40972 | 0.59556 | 0.58806 | 0.98  | 0.53525 | 0.56208 | 0.50056 |
| 0.984 | 0.41979 | 0.48174 | 0.5038  | 0.53808 | 0.984 | 0.50716 | 0.45741 | 0.4294  | 0.3838  | 0.984 | 0.38033 | 0.41631 | 0.5977  | 0.5939  | 0.984 | 0.53815 | 0.56737 | 0.50302 |
| 0.988 | 0.42026 | 0.48416 | 0.50817 | 0.54559 | 0.988 | 0.51367 | 0.46324 | 0.43554 | 0.38926 | 0.988 | 0.38491 | 0.42291 | 0.60054 | 0.6001  | 0.988 | 0.54177 | 0.57298 | 0.50596 |
| 0.992 | 0.4212  | 0.48688 | 0.51231 | 0.55375 | 0.992 | 0.51986 | 0.46947 | 0.44202 | 0.39493 | 0.992 | 0.38948 | 0.42987 | 0.60409 | 0.60667 | 0.992 | 0.5451  | 0.57889 | 0.5089  |
| 0.996 | 0.42167 | 0.48931 | 0.51668 | 0.56126 | 0.996 | 0.52604 | 0.47569 | 0.44816 | 0.40039 | 0.996 | 0.39349 | 0.4372  | 0.60694 | 0.61287 | 0.996 | 0.54857 | 0.58419 | 0.51185 |
| 1     | 0.42309 | 0.49233 | 0.52174 | 0.56942 | 1     | 0.53255 | 0.4823  | 0.45464 | 0.40616 | 1     | 0.39864 | 0.44416 | 0.61049 | 0.61944 | 1     | 0.55248 | 0.5898  | 0.51528 |
| 1.004 | 0.42403 | 0.49536 | 0.52657 | 0.57758 | 1.004 | 0.53939 | 0.48891 | 0.4618  | 0.41258 | 1.004 | 0.40379 | 0.45185 | 0.61405 | 0.62637 | 1.004 | 0.55683 | 0.5954  | 0.51872 |
| 1.008 | 0.42544 | 0.49899 | 0.53163 | 0.58574 | 1.008 | 0.54622 | 0.49553 | 0.46896 | 0.41847 | 1.008 | 0.40951 | 0.45955 | 0.61831 | 0.63331 | 1.008 | 0.56088 | 0.60101 | 0.52215 |
| 1.012 | 0.42685 | 0.50201 | 0.53692 | 0.5939  | 1.012 | 0.55273 | 0.50253 | 0.47613 | 0.42489 | 1.012 | 0.41466 | 0.46688 | 0.62257 | 0.63987 | 1.012 | 0.56464 | 0.6063  | 0.52559 |
| 1.016 | 0.42826 | 0.50594 | 0.54221 | 0.60141 | 1.016 | 0.55957 | 0.50875 | 0.48329 | 0.43131 | 1.016 | 0.42038 | 0.47494 | 0.62684 | 0.64681 | 1.016 | 0.56942 | 0.6116  | 0.52951 |
| 1.02  | 0.43014 | 0.50958 | 0.54773 | 0.60924 | 1.02  | 0.56641 | 0.51614 | 0.49045 | 0.43826 | 1.02  | 0.4261  | 0.483   | 0.63181 | 0.65374 | 1.02  | 0.57449 | 0.61689 | 0.53343 |
| 1.024 | 0.4325  | 0.51321 | 0.55326 | 0.61643 | 1.024 | 0.57292 | 0.52314 | 0.49761 | 0.44468 | 1.024 | 0.4324  | 0.49069 | 0.63679 | 0.66031 | 1.024 | 0.5797  | 0.62219 | 0.53736 |
| 1.028 | 0.43438 | 0.51653 | 0.55832 | 0.62296 | 1.028 | 0.57878 | 0.52898 | 0.50443 | 0.45057 | 1.028 | 0.43812 | 0.49802 | 0.64105 | 0.66651 | 1.028 | 0.58419 | 0.62686 | 0.54128 |
| 1.032 | 0.43673 | 0.52047 | 0.56384 | 0.62948 | 1.032 | 0.58496 | 0.53559 | 0.51126 | 0.45806 | 1.032 | 0.44441 | 0.50608 | 0.64674 | 0.67344 | 1.032 | 0.58969 | 0.63184 | 0.54521 |
| 1.036 | 0.43909 | 0.5241  | 0.56913 | 0.63536 | 1.036 | 0.59049 | 0.5422  | 0.51774 | 0.46501 | 1.036 | 0.45071 | 0.51378 | 0.65172 | 0.67964 | 1.036 | 0.5949  | 0.63652 | 0.54913 |
| 1.04  | 0.44191 | 0.52773 | 0.57396 | 0.64091 | 1.04  | 0.59603 | 0.54842 | 0.52422 | 0.47197 | 1.04  | 0.457   | 0.52111 | 0.6574  | 0.68585 | 1.04  | 0.60012 | 0.64088 | 0.55306 |
| 1.044 | 0.44426 | 0.53106 | 0.57902 | 0.64548 | 1.044 | 0.60091 | 0.55387 | 0.53001 | 0.47892 | 1.044 | 0.46272 | 0.52843 | 0.66238 | 0.69132 | 1.044 | 0.60518 | 0.64493 | 0.55698 |
| 1.048 | 0.44708 | 0.53408 | 0.58362 | 0.64972 | 1.048 | 0.60514 | 0.55932 | 0.53581 | 0.48534 | 1.048 | 0.46844 | 0.53539 | 0.66735 | 0.69679 | 1.048 | 0.6104  | 0.64866 | 0.56091 |
| 1.052 | 0.44991 | 0.53741 | 0.58822 | 0.65364 | 1.052 | 0.60905 | 0.56476 | 0.54127 | 0.4923  | 1.052 | 0.47474 | 0.54272 | 0.67233 | 0.70227 | 1.052 | 0.61561 | 0.6524  | 0.56483 |
| 1.056 | 0.45273 | 0.54074 | 0.59282 | 0.65723 | 1.056 | 0.61296 | 0.56982 | 0.54638 | 0.49872 | 1.056 | 0.48046 | 0.54932 | 0.67802 | 0.70701 | 1.056 | 0.62082 | 0.65583 | 0.56876 |
| 1.06  | 0.45508 | 0.54316 | 0.59673 | 0.66017 | 1.06  | 0.61589 | 0.57448 | 0.55048 | 0.50567 | 1.06  | 0.48561 | 0.55555 | 0.68228 | 0.71139 | 1.06  | 0.62603 | 0.65863 | 0.5717  |
| 1.064 | 0.45791 | 0.54618 | 0.60041 | 0.66311 | 1.064 | 0.61849 | 0.57876 | 0.55491 | 0.51209 | 1.064 | 0.49076 | 0.56178 | 0.68726 | 0.7154  | 1.064 | 0.63095 | 0.66112 | 0.57514 |
| 1.068 | 0.46073 | 0.5486  | 0.60478 | 0.66539 | 1.068 | 0.62109 | 0.58304 | 0.559   | 0.51798 | 1.068 | 0.49591 | 0.56727 | 0.69223 | 0.71941 | 1.068 | 0.63573 | 0.66393 | 0.57857 |
| 1.072 | 0.46308 | 0.55102 | 0.60847 | 0.66735 | 1.072 | 0.62305 | 0.58732 | 0.56241 | 0.52386 | 1.072 | 0.50106 | 0.57277 | 0.6965  | 0.72306 | 1.072 | 0.64036 | 0.66642 | 0.58151 |
| 1.076 | 0.46544 | 0.55344 | 0.61192 | 0.66898 | 1.076 | 0.625   | 0.59082 | 0.56617 | 0.52921 | 1.076 | 0.50506 | 0.57753 | 0.70005 | 0.72598 | 1.076 | 0.64485 | 0.6686  | 0.58397 |
| 1.08  | 0.46826 | 0.55556 | 0.6156  | 0.67062 | 1.08  | 0.6263  | 0.59393 | 0.56924 | 0.53456 | 1.08  | 0.50907 | 0.5823  | 0.70431 | 0.7289  | 1.08  | 0.64891 | 0.67016 | 0.58593 |
| 1.084 | 0.47108 | 0.55829 | 0.61928 | 0.67258 | 1.084 | 0.62826 | 0.59782 | 0.57333 | 0.53991 | 1.084 | 0.51307 | 0.58742 | 0.70858 | 0.73182 | 1.084 | 0.65354 | 0.67234 | 0.58936 |
| 1.088 | 0.47344 | 0.5604  | 0.62273 | 0.67421 | 1.088 | 0.62988 | 0.60093 | 0.57606 | 0.54473 | 1.088 | 0.51708 | 0.59182 | 0.71213 | 0.73401 | 1.088 | 0.65745 | 0.6742  | 0.59182 |
| 1.092 | 0.47579 | 0.56222 | 0.62572 | 0.67551 | 1.092 | 0.63086 | 0.60366 | 0.57913 | 0.54954 | 1.092 | 0.51994 | 0.59549 | 0.71498 | 0.7362  | 1.092 | 0.66107 | 0.67514 | 0.59378 |
| 1.096 | 0.47861 | 0.56434 | 0.62894 | 0.67715 | 1.096 | 0.63249 | 0.60677 | 0.5822  | 0.55435 | 1.096 | 0.52337 | 0.59952 | 0.71853 | 0.73802 | 1.096 | 0.66483 | 0.67701 | 0.59623 |
| 1.1   | 0.48097 | 0.56645 | 0.63262 | 0.6791  | 1.1   | 0.63411 | 0.60949 | 0.58527 | 0.55863 | 1.1   | 0.52681 | 0.60355 | 0.72208 | 0.73985 | 1.1   | 0.66845 | 0.67856 | 0.59819 |
| 1.104 | 0.48332 | 0.56857 | 0.63584 | 0.68074 | 1.104 | 0.63542 | 0.6126  | 0.58799 | 0.56345 | 1.104 | 0.53024 | 0.60721 | 0.72493 | 0.74131 | 1.104 | 0.67193 | 0.67981 | 0.60016 |
| 1.108 | 0.48567 | 0.57069 | 0.63906 | 0.6827  | 1.108 | 0.63672 | 0.61532 | 0.59106 | 0.56773 | 1.108 | 0.5331  | 0.61051 | 0.72777 | 0.74277 | 1.108 | 0.67555 | 0.68106 | 0.60212 |
| 1.112 | 0.48849 | 0.57311 | 0.64251 | 0.68465 | 1.112 | 0.63867 | 0.61805 | 0.59413 | 0.57201 | 1.112 | 0.53596 | 0.61454 | 0.73061 | 0.74386 | 1.112 | 0.67873 | 0.68199 | 0.60359 |
| 1.116 | 0.49132 | 0.57553 | 0.64619 | 0.68694 | 1.116 | 0.64062 | 0.62116 | 0.59754 | 0.57629 | 1.116 | 0.53939 | 0.6182  | 0.73275 | 0.74532 | 1.116 | 0.68177 | 0.68386 | 0.60604 |
| 1.12  | 0.49414 | 0.57886 | 0.65033 | 0.68955 | 1.12  | 0.64355 | 0.62427 | 0.6013  | 0.5811  | 1.12  | 0.5434  | 0.62223 | 0.73559 | 0.74678 | 1.12  | 0.6851  | 0.68542 | 0.60801 |
| 1.124 | 0.49696 | 0.58128 | 0.65378 | 0.69216 | 1.124 | 0.64551 | 0.62738 | 0.60402 | 0.58538 | 1.124 | 0.54683 | 0.6259  | 0.73772 | 0.74787 | 1.124 | 0.68829 | 0.68697 | 0.61046 |
| 1.128 | 0.50073 | 0.5843  | 0.65769 | 0.6951  | 1.128 | 0.64844 | 0.63088 | 0.60812 | 0.5902  | 1.128 | 0.55027 | 0.63029 | 0.74056 | 0.74933 | 1.128 | 0.69205 | 0.68884 | 0.61291 |
| 1.132 | 0.50402 | 0.58763 | 0.66184 | 0.69804 | 1.132 | 0.65169 | 0.63438 | 0.61221 | 0.59501 | 1.132 | 0.55427 | 0.63469 | 0.7427  | 0.75043 | 1.132 | 0.6948  | 0.69102 | 0.61537 |
| 1.136 | 0.50779 | 0.59096 | 0.66598 | 0.70163 | 1.136 | 0.65527 | 0.63788 | 0.6163  | 0.59983 | 1.136 | 0.55885 | 0.63909 | 0.74554 | 0.75225 | 1.136 | 0.69755 | 0.69352 | 0.61831 |
| 1.14  | 0.51155 | 0.59459 | 0.66989 | 0.70522 | 1.14  | 0.65885 | 0.64177 | 0.62074 | 0.60464 | 1.14  | 0.56343 | 0.64349 | 0.74767 | 0.75371 | 1.14  | 0.70074 | 0.6957  | 0.62076 |
| 1.144 | 0.51579 | 0.59883 | 0.67449 | 0.70914 | 1.144 | 0.66243 | 0.64605 | 0.62551 | 0.60999 | 1.144 | 0.568   | 0.64861 | 0.75052 | 0.75517 | 1.144 | 0.70421 | 0.6985  | 0.62371 |
| 1.148 | 0.52049 | 0.60306 | 0.67909 | 0.71371 | 1.148 | 0.66699 | 0.65033 | 0.63029 | 0.61534 | 1.148 | 0.57258 | 0.65411 | 0.75336 | 0.75736 | 1.148 | 0.7074  | 0.70192 | 0.62763 |
| 1.152 | 0.5252  | 0.6079  | 0.68415 | 0.71828 | 1.152 | 0.67188 | 0.655   | 0.6354  | 0.62123 | 1.152 | 0.57773 | 0.65961 | 0.7562  | 0.75955 | 1.152 | 0.71116 | 0.70535 | 0.63107 |
| 1.156 | 0.53038 | 0.61274 | 0.68875 | 0.72285 | 1.156 | 0.67643 | 0.65928 | 0.64052 | 0.62658 | 1.156 | 0.58345 | 0.6651  | 0.75904 | 0.7621  | 1.156 | 0.7142  | 0.70878 | 0.63499 |
| 1.16  | 0.53602 | 0.61819 | 0.69404 | 0.72872 | 1.16  | 0.68229 | 0.66472 | 0.64632 | 0.633   | 1.16  | 0.58917 | 0.6717  | 0.76189 | 0.76502 | 1.16  | 0.71768 | 0.71314 | 0.63941 |
| 1.164 | 0.54214 | 0.62363 | 0.69933 | 0.73395 | 1.164 | 0.68783 | 0.66978 | 0.65177 | 0.63942 | 1.164 | 0.59547 | 0.67793 | 0.76544 | 0.76794 | 1.164 | 0.72144 | 0.7175  | 0.64431 |
| 1.168 | 0.54779 | 0.62969 | 0.70485 | 0.73982 | 1.168 | 0.69368 | 0.67561 | 0.65791 | 0.64637 | 1.168 | 0.60176 | 0.68452 | 0.76828 | 0.77123 | 1.168 | 0.72521 |         |         |

|       |          |          |          |          |       |          |          |          |          |       |          |          |          |          |       |          |          |          |
|-------|----------|----------|----------|----------|-------|----------|----------|----------|----------|-------|----------|----------|----------|----------|-------|----------|----------|----------|
| 0.052 | 0.00117  | 2.21E-04 | 0.00177  | 0.01499  | 0.052 | 0.01401  | 0.01675  | 0.01598  | 0.00355  | 0.052 | 0.01016  | 0.01813  | 0.00795  | 0.02469  | 0.052 | 0.00276  | 0.00931  | 0.0094   |
| 0.056 | 8.01E-04 | 0        | 0.00113  | 0.01323  | 0.056 | 0.01215  | 0.0148   | 0.01393  | 0.00295  | 0.056 | 0.00853  | 0.01605  | 0.00682  | 0.02205  | 0.056 | 0.00199  | 0.00758  | 0.00792  |
| 0.06  | 4.29E-04 | 2.21E-04 | 9.67E-04 | 0.01117  | 0.06  | 0.01046  | 0.01312  | 0.01227  | 0.0025   | 0.06  | 0.0072   | 0.01424  | 0.00593  | 0.01955  | 0.06  | 0.00155  | 0.00629  | 0.00647  |
| 0.064 | 1.68E-04 | 6.15E-04 | 4.84E-04 | 0.00911  | 0.064 | 0.00892  | 0.01145  | 0.01051  | 0.0019   | 0.064 | 0.00576  | 0.01217  | 0.00513  | 0.01705  | 0.064 | 0.0011   | 0.00501  | 0.00523  |
| 0.068 | 0        | 0.00108  | 1.61E-04 | 0.00794  | 0.068 | 0.00735  | 0.00977  | 0.00882  | 0.00145  | 0.068 | 0.00433  | 0.0101   | 0.00424  | 0.01454  | 0.068 | 4.97E-04 | 0.0037   | 0.00403  |
| 0.072 | 3.17E-04 | 0.00192  | 0        | 0.00676  | 0.072 | 0.0061   | 0.0081   | 0.00723  | 0.0011   | 0.072 | 0.00306  | 0.00829  | 0.00344  | 0.01217  | 0.072 | 3.31E-04 | 0.00257  | 0.00306  |
| 0.076 | 8.20E-04 | 0.0031   | 1.61E-04 | 0.00558  | 0.076 | 0.0048   | 0.0067   | 0.00578  | 7.00E-04 | 0.076 | 0.00213  | 0.00647  | 0.00278  | 0.00997  | 0.076 | 1.10E-04 | 0.00164  | 0.002    |
| 0.08  | 0.00158  | 0.00453  | 6.45E-04 | 0.00382  | 0.08  | 0.00353  | 0.00503  | 0.00444  | 3.00E-04 | 0.08  | 0.00127  | 0.00518  | 0.00212  | 0.00807  | 0.08  | 0        | 9.36E-04 | 0.00117  |
| 0.084 | 0.00283  | 0.0064   | 0.00129  | 0.00323  | 0.084 | 0.00238  | 0.00391  | 0.00317  | 2.50E-04 | 0.084 | 4.46E-04 | 0.00363  | 0.00151  | 0.0063   | 0.084 | 0        | 4.68E-04 | 5.51E-04 |
| 0.088 | 0.00458  | 0.0089   | 0.00226  | 0.00206  | 0.088 | 0.00139  | 0.00279  | 0.00226  | 5.00E-05 | 0.088 | 6.37E-05 | 0.00259  | 9.88E-04 | 0.00462  | 0.088 | 5.52E-05 | 9.36E-05 | 2.07E-04 |
| 0.092 | 0.00701  | 0.01188  | 0.00355  | 0.00118  | 0.092 | 8.71E-04 | 0.00195  | 0.00127  | 0        | 0.092 | 0        | 0.00155  | 6.59E-04 | 0.00324  | 0.092 | 1.66E-04 | 0        | 0        |
| 0.096 | 0.01004  | 0.01557  | 0.00548  | 5.88E-04 | 0.096 | 3.53E-04 | 8.38E-04 | 8.11E-04 | 2.50E-04 | 0.096 | 1.91E-04 | 5.18E-04 | 2.82E-04 | 0.00194  | 0.096 | 1.66E-04 | 3.74E-04 | 0        |
| 0.1   | 0.01398  | 0.02     | 0.00806  | 0        | 0.1   | 0        | 2.79E-04 | 1.41E-04 | 3.50E-04 | 0.1   | 6.05E-04 | 2.59E-04 | 0        | 9.93E-04 | 0.1   | 1.66E-04 | 8.66E-04 | 4.48E-04 |
| 0.104 | 0.01871  | 0.02536  | 0.01112  | 0        | 0.104 | 1.18E-04 | 0        | 2.12E-04 | 9.00E-04 | 0.104 | 0.00131  | 0        | 0        | 3.88E-04 | 0.104 | 3.87E-04 | 0.00201  | 0.00134  |
| 0.108 | 0.02449  | 0.03168  | 0.01499  | 2.94E-04 | 0.108 | 5.65E-04 | 0        | 0        | 0.00165  | 0.108 | 0.00277  | 2.59E-04 | 1.41E-04 | 0        | 0.108 | 6.07E-04 | 0.00349  | 0.00244  |
| 0.112 | 0.03138  | 0.03892  | 0.01966  | 5.88E-04 | 0.112 | 0.00134  | 0        | 6.70E-04 | 0.00225  | 0.112 | 0.00481  | 7.77E-04 | 5.65E-04 | 3.45E-04 | 0.112 | 8.28E-04 | 0.00538  | 0.0042   |
| 0.116 | 0.03939  | 0.04757  | 0.02531  | 0.00176  | 0.116 | 0.00273  | 8.38E-04 | 0.00194  | 0.0034   | 0.116 | 0.00732  | 0.00207  | 0.00104  | 0.00104  | 0.116 | 9.94E-04 | 0.00795  | 0.00644  |
| 0.12  | 0.04871  | 0.05739  | 0.03175  | 0.00323  | 0.12  | 0.00454  | 0.00195  | 0.00328  | 0.00485  | 0.12  | 0.0107   | 0.00363  | 0.00174  | 0.00216  | 0.12  | 0.00127  | 0.011    | 0.00912  |
| 0.124 | 0.05933  | 0.06868  | 0.03981  | 0.00558  | 0.124 | 0.00695  | 0.00335  | 0.00529  | 0.0066   | 0.124 | 0.01446  | 0.00621  | 0.00287  | 0.00406  | 0.124 | 0.00155  | 0.01455  | 0.01233  |
| 0.128 | 0.07107  | 0.08145  | 0.04884  | 0.00823  | 0.128 | 0.01013  | 0.00558  | 0.00783  | 0.0087   | 0.128 | 0.01927  | 0.00932  | 0.00419  | 0.0066   | 0.128 | 0.00215  | 0.01883  | 0.01629  |
| 0.132 | 0.08393  | 0.09554  | 0.05916  | 0.01146  | 0.132 | 0.01368  | 0.0081   | 0.01083  | 0.0111   | 0.132 | 0.02487  | 0.01269  | 0.00588  | 0.00971  | 0.132 | 0.00271  | 0.02365  | 0.02066  |
| 0.136 | 0.09809  | 0.11102  | 0.07108  | 0.01558  | 0.136 | 0.01808  | 0.01117  | 0.01478  | 0.01415  | 0.136 | 0.0313   | 0.01735  | 0.00791  | 0.01381  | 0.136 | 0.00348  | 0.02906  | 0.02575  |
| 0.14  | 0.113    | 0.12799  | 0.08414  | 0.02028  | 0.14  | 0.02324  | 0.0148   | 0.01904  | 0.01761  | 0.14  | 0.03888  | 0.02279  | 0.01017  | 0.01864  | 0.14  | 0.00442  | 0.03491  | 0.0315   |
| 0.144 | 0.12884  | 0.14641  | 0.09848  | 0.02587  | 0.144 | 0.02889  | 0.01926  | 0.02398  | 0.02156  | 0.144 | 0.04719  | 0.02874  | 0.01294  | 0.02413  | 0.144 | 0.00541  | 0.04146  | 0.03784  |
| 0.148 | 0.14524  | 0.16585  | 0.11428  | 0.03204  | 0.148 | 0.03549  | 0.02429  | 0.02977  | 0.02606  | 0.148 | 0.05646  | 0.03547  | 0.016    | 0.03082  | 0.148 | 0.0069   | 0.04824  | 0.04459  |
| 0.152 | 0.16201  | 0.18626  | 0.13137  | 0.0388   | 0.152 | 0.04279  | 0.02987  | 0.03597  | 0.03111  | 0.152 | 0.06687  | 0.04324  | 0.01963  | 0.03833  | 0.152 | 0.00817  | 0.0555   | 0.05192  |
| 0.156 | 0.17934  | 0.20767  | 0.14958  | 0.04615  | 0.156 | 0.05103  | 0.03629  | 0.04246  | 0.03661  | 0.156 | 0.07808  | 0.05205  | 0.02353  | 0.047    | 0.156 | 0.00999  | 0.06298  | 0.0597   |
| 0.16  | 0.19667  | 0.22956  | 0.16876  | 0.05438  | 0.16  | 0.05998  | 0.04327  | 0.04987  | 0.04266  | 0.16  | 0.0905   | 0.06189  | 0.02791  | 0.05684  | 0.16  | 0.01193  | 0.07094  | 0.06796  |
| 0.164 | 0.21381  | 0.2517   | 0.18875  | 0.0632   | 0.164 | 0.06963  | 0.05081  | 0.05763  | 0.04932  | 0.164 | 0.10324  | 0.0725   | 0.03247  | 0.0675   | 0.164 | 0.01408  | 0.07866  | 0.07619  |
| 0.168 | 0.23096  | 0.27384  | 0.20954  | 0.0729   | 0.168 | 0.07999  | 0.05918  | 0.06609  | 0.05652  | 0.168 | 0.11725  | 0.08441  | 0.0376   | 0.07941  | 0.168 | 0.01651  | 0.08685  | 0.08497  |
| 0.172 | 0.2481   | 0.29598  | 0.23082  | 0.08289  | 0.172 | 0.09106  | 0.06784  | 0.07491  | 0.06422  | 0.172 | 0.13222  | 0.09762  | 0.04278  | 0.09279  | 0.172 | 0.01921  | 0.09504  | 0.09389  |
| 0.176 | 0.26543  | 0.31762  | 0.25193  | 0.09406  | 0.176 | 0.10307  | 0.07705  | 0.08443  | 0.07248  | 0.176 | 0.14782  | 0.11186  | 0.04843  | 0.10729  | 0.176 | 0.02214  | 0.10369  | 0.10301  |
| 0.18  | 0.28295  | 0.33853  | 0.27369  | 0.10611  | 0.18  | 0.11578  | 0.08654  | 0.09501  | 0.08138  | 0.18  | 0.16438  | 0.12765  | 0.05436  | 0.12352  | 0.18  | 0.02562  | 0.11235  | 0.11255  |
| 0.184 | 0.30121  | 0.35895  | 0.29545  | 0.11905  | 0.184 | 0.12921  | 0.09659  | 0.1063   | 0.09103  | 0.184 | 0.1819   | 0.14526  | 0.06052  | 0.14113  | 0.184 | 0.02937  | 0.12147  | 0.12226  |
| 0.188 | 0.32059  | 0.37863  | 0.31738  | 0.13374  | 0.188 | 0.14404  | 0.1072   | 0.11829  | 0.10149  | 0.188 | 0.20069  | 0.16468  | 0.06707  | 0.16142  | 0.188 | 0.03374  | 0.13107  | 0.13259  |
| 0.192 | 0.34164  | 0.39806  | 0.33962  | 0.14991  | 0.192 | 0.16029  | 0.11809  | 0.13204  | 0.11279  | 0.192 | 0.22043  | 0.18643  | 0.07384  | 0.18343  | 0.192 | 0.03876  | 0.14159  | 0.14329  |
| 0.196 | 0.36438  | 0.41626  | 0.3617   | 0.16755  | 0.196 | 0.17771  | 0.12954  | 0.14686  | 0.12459  | 0.196 | 0.24145  | 0.20974  | 0.081    | 0.2076   | 0.196 | 0.04412  | 0.15282  | 0.15493  |
| 0.2   | 0.38916  | 0.43447  | 0.38507  | 0.18783  | 0.2   | 0.19726  | 0.14182  | 0.16308  | 0.1372   | 0.2   | 0.26342  | 0.23563  | 0.08871  | 0.23479  | 0.2   | 0.05036  | 0.16476  | 0.16788  |
| 0.204 | 0.41581  | 0.45169  | 0.40941  | 0.21076  | 0.204 | 0.21916  | 0.15438  | 0.18177  | 0.15045  | 0.204 | 0.28699  | 0.26308  | 0.09667  | 0.265    | 0.204 | 0.05753  | 0.17739  | 0.18196  |
| 0.208 | 0.44432  | 0.46841  | 0.43504  | 0.23692  | 0.208 | 0.24341  | 0.16806  | 0.20223  | 0.16421  | 0.208 | 0.31119  | 0.29208  | 0.10519  | 0.29823  | 0.208 | 0.06526  | 0.19073  | 0.1978   |
| 0.212 | 0.47395  | 0.4844   | 0.46212  | 0.26573  | 0.212 | 0.27049  | 0.18258  | 0.22515  | 0.17821  | 0.212 | 0.33571  | 0.32134  | 0.11422  | 0.33448  | 0.212 | 0.07399  | 0.20406  | 0.21467  |
| 0.216 | 0.50376  | 0.49966  | 0.49113  | 0.29777  | 0.216 | 0.3011   | 0.19821  | 0.24984  | 0.19217  | 0.216 | 0.36087  | 0.3506   | 0.12387  | 0.3729   | 0.216 | 0.08376  | 0.21763  | 0.23326  |
| 0.22  | 0.53265  | 0.51392  | 0.52208  | 0.33216  | 0.22  | 0.33431  | 0.21496  | 0.27629  | 0.20582  | 0.22  | 0.38475  | 0.3783   | 0.13413  | 0.41433  | 0.22  | 0.09453  | 0.23073  | 0.25323  |
| 0.224 | 0.55967  | 0.52696  | 0.55529  | 0.3689   | 0.224 | 0.37081  | 0.23339  | 0.30451  | 0.21838  | 0.224 | 0.40768  | 0.40368  | 0.1451   | 0.45749  | 0.224 | 0.10645  | 0.2429   | 0.27389  |
| 0.228 | 0.58277  | 0.53778  | 0.59026  | 0.40623  | 0.228 | 0.40872  | 0.25209  | 0.33307  | 0.22923  | 0.228 | 0.42774  | 0.42465  | 0.15663  | 0.50022  | 0.228 | 0.11882  | 0.25366  | 0.29558  |
| 0.232 | 0.60122  | 0.54713  | 0.62669  | 0.44356  | 0.232 | 0.44898  | 0.27219  | 0.36235  | 0.23813  | 0.232 | 0.44526  | 0.44122  | 0.16863  | 0.54381  | 0.232 | 0.1323   | 0.26279  | 0.31761  |
| 0.236 | 0.61352  | 0.55353  | 0.66425  | 0.47942  | 0.236 | 0.48972  | 0.29257  | 0.39091  | 0.24449  | 0.236 | 0.45831  | 0.4521   | 0.18115  | 0.58481  | 0.236 | 0.14593  | 0.26957  | 0.3393   |
| 0.24  | 0.61893  | 0.55673  | 0.70181  | 0.51205  | 0.24  | 0.52999  | 0.31295  | 0.41701  | 0.24794  | 0.24  | 0.46691  | 0.45702  | 0.19376  | 0.62236  | 0.24  | 0.15963  | 0.27378  | 0.35927  |
| 0.244 | 0.61669  | 0.55673  | 0.73823  | 0.53909  | 0.244 | 0.56837  | 0.33305  | 0.44064  | 0.24794  | 0.244 | 0.46946  | 0.4552   | 0.20642  | 0.65473  | 0.244 | 0.17315  | 0.27542  | 0.37786  |
| 0.248 | 0.60719  | 0.55328  | 0.77257  | 0.56055  | 0.248 | 0.60369  | 0.35204  | 0.46004  | 0.24454  | 0.248 | 0.46691  | 0.44692  | 0.21842  | 0.68062  | 0.248 | 0.18652  | 0.27378  | 0.39404  |
| 0.252 | 0.59079  | 0.54639  | 0.80464  | 0.57437  | 0.252 | 0.63478  | 0.36907  | 0.47521  | 0.23838  | 0.252 | 0.45927  | 0.4332   | 0.23     | 0.69832  | 0.252 | 0.19905  | 0.27004  | 0.40713  |
| 0.256 | 0.56787  | 0.53631  | 0.83253  | 0.57995  | 0.256 | 0.66021  | 0.38358  | 0.48543  | 0.22913  | 0.256 | 0.44653  | 0.41455  | 0.24054  | 0.70695  | 0.256 | 0.21059  | 0.26349  | 0.41642  |
| 0.26  | 0.53954  | 0.52229  | 0.85493  | 0.57643  | 0.26  | 0.67787  | 0.39447  | 0.48931  | 0.21758  | 0.26  | 0.4287   | 0.39125  | 0.24939  | 0.70609  | 0.26  | 0.22058  | 0.2546   | 0.42193  |
| 0.264 | 0.50749  | 0.50581  | 0.87202  | 0.56437  | 0.264 | 0.68799  | 0.40229  | 0.4879   | 0.20457  | 0.264 | 0.40832  | 0.36561  | 0.25668  | 0.69659  | 0.264 | 0.22903  | 0.24407  | 0.42365  |
| 0.268 | 0.47264  | 0.48662  | 0.88282  | 0.5438   | 0.268 | 0.68917  | 0.40536  | 0.48085  | 0.19057  | 0.268 | 0.38475  | 0.33817  | 0.26191  | 0.6776   | 0.268 | 0.23555  | 0.23214  | 0.42124  |
| 0.272 | 0.43649  | 0.46472  | 0.88685  | 0.51617  | 0.272 | 0.68187  | 0.4048   | 0.46886  | 0.17591  | 0.272 | 0.35959  | 0.30968  | 0.26511  | 0.65084  | 0.272 | 0.24002  | 0.21904  | 0.41505  |
| 0.27  |          |          |          |          |       |          |          |          |          |       |          |          |          |          |       |          |          |          |

|       |         |         |         |         |       |         |         |         |         |       |         |         |         |         |       |         |         |         |
|-------|---------|---------|---------|---------|-------|---------|---------|---------|---------|-------|---------|---------|---------|---------|-------|---------|---------|---------|
| 0.464 | 0.14132 | 0.17888 | 0.38524 | 0.0338  | 0.464 | 0.10071 | 0.08291 | 0.11265 | 0.08903 | 0.464 | 0.08827 | 0.02589 | 0.11229 | 0.15667 | 0.464 | 0.17752 | 0.09925 | 0.14629 |
| 0.468 | 0.14337 | 0.18061 | 0.38556 | 0.03557 | 0.468 | 0.1026  | 0.08459 | 0.11476 | 0.09098 | 0.468 | 0.08987 | 0.02563 | 0.11338 | 0.15926 | 0.468 | 0.18044 | 0.10112 | 0.1477  |
| 0.472 | 0.14542 | 0.18233 | 0.38588 | 0.03704 | 0.472 | 0.10425 | 0.08626 | 0.11653 | 0.09283 | 0.472 | 0.09146 | 0.02538 | 0.11418 | 0.16185 | 0.472 | 0.18315 | 0.10252 | 0.1488  |
| 0.476 | 0.14747 | 0.1838  | 0.3862  | 0.03851 | 0.476 | 0.10566 | 0.08794 | 0.11864 | 0.09463 | 0.476 | 0.09337 | 0.02512 | 0.11526 | 0.16444 | 0.476 | 0.1858  | 0.10439 | 0.15025 |
| 0.48  | 0.14952 | 0.18553 | 0.38669 | 0.03998 | 0.48  | 0.10731 | 0.08961 | 0.12041 | 0.09628 | 0.48  | 0.09528 | 0.02486 | 0.11625 | 0.16659 | 0.48  | 0.18823 | 0.1058  | 0.15145 |
| 0.484 | 0.15157 | 0.18676 | 0.38685 | 0.04145 | 0.484 | 0.10872 | 0.09101 | 0.12252 | 0.09788 | 0.484 | 0.09655 | 0.02434 | 0.11723 | 0.16918 | 0.484 | 0.19049 | 0.10744 | 0.15266 |
| 0.488 | 0.15362 | 0.18848 | 0.38733 | 0.04292 | 0.488 | 0.11013 | 0.09296 | 0.12429 | 0.09948 | 0.488 | 0.09847 | 0.02382 | 0.11836 | 0.17134 | 0.488 | 0.19242 | 0.10931 | 0.15404 |
| 0.492 | 0.15586 | 0.18995 | 0.38781 | 0.04439 | 0.492 | 0.11155 | 0.09464 | 0.1264  | 0.10119 | 0.492 | 0.10069 | 0.02382 | 0.11949 | 0.17436 | 0.492 | 0.19441 | 0.11094 | 0.15545 |
| 0.496 | 0.15809 | 0.19143 | 0.3883  | 0.04556 | 0.496 | 0.11296 | 0.09631 | 0.12817 | 0.10279 | 0.496 | 0.10229 | 0.0233  | 0.12058 | 0.17652 | 0.496 | 0.19596 | 0.11258 | 0.15693 |
| 0.5   | 0.16033 | 0.19315 | 0.38862 | 0.04674 | 0.5   | 0.11437 | 0.09799 | 0.13028 | 0.10429 | 0.5   | 0.1042  | 0.0233  | 0.12175 | 0.17911 | 0.5   | 0.19712 | 0.11422 | 0.15834 |
| 0.504 | 0.16257 | 0.19438 | 0.38943 | 0.04791 | 0.504 | 0.11578 | 0.09939 | 0.1324  | 0.10589 | 0.504 | 0.10611 | 0.02305 | 0.12284 | 0.18127 | 0.504 | 0.19839 | 0.11609 | 0.15992 |
| 0.508 | 0.16518 | 0.1961  | 0.39007 | 0.04909 | 0.508 | 0.11743 | 0.10134 | 0.13451 | 0.10764 | 0.508 | 0.10834 | 0.0233  | 0.12401 | 0.18429 | 0.508 | 0.19922 | 0.11773 | 0.16158 |
| 0.512 | 0.16778 | 0.19783 | 0.39088 | 0.05056 | 0.512 | 0.11908 | 0.10329 | 0.13663 | 0.10939 | 0.512 | 0.11057 | 0.02356 | 0.12524 | 0.18688 | 0.512 | 0.19999 | 0.11984 | 0.16347 |
| 0.516 | 0.17021 | 0.1993  | 0.39152 | 0.05203 | 0.516 | 0.12026 | 0.10497 | 0.13839 | 0.11104 | 0.516 | 0.11248 | 0.02382 | 0.12651 | 0.18947 | 0.516 | 0.20038 | 0.12147 | 0.16509 |
| 0.52  | 0.17319 | 0.20127 | 0.39249 | 0.0535  | 0.52  | 0.12191 | 0.1072  | 0.14121 | 0.11304 | 0.52  | 0.11502 | 0.02434 | 0.12773 | 0.19206 | 0.52  | 0.20082 | 0.12358 | 0.16688 |
| 0.524 | 0.17617 | 0.20299 | 0.39346 | 0.05526 | 0.524 | 0.12379 | 0.10916 | 0.14368 | 0.11474 | 0.524 | 0.11725 | 0.02538 | 0.12919 | 0.19465 | 0.524 | 0.20126 | 0.12592 | 0.16891 |
| 0.528 | 0.17952 | 0.20496 | 0.39458 | 0.05703 | 0.528 | 0.12591 | 0.11139 | 0.14615 | 0.11689 | 0.528 | 0.11948 | 0.02641 | 0.13055 | 0.1981  | 0.528 | 0.20142 | 0.12826 | 0.17094 |
| 0.532 | 0.18288 | 0.20693 | 0.39571 | 0.0585  | 0.532 | 0.12779 | 0.11362 | 0.14862 | 0.11899 | 0.532 | 0.12203 | 0.02771 | 0.13211 | 0.20069 | 0.532 | 0.2017  | 0.13083 | 0.17301 |
| 0.536 | 0.18642 | 0.2089  | 0.397   | 0.06055 | 0.536 | 0.12991 | 0.11614 | 0.15109 | 0.12104 | 0.536 | 0.12458 | 0.02926 | 0.13342 | 0.20371 | 0.536 | 0.20192 | 0.13317 | 0.17542 |
| 0.54  | 0.19033 | 0.21111 | 0.39877 | 0.0629  | 0.54  | 0.13203 | 0.11865 | 0.15426 | 0.12324 | 0.54  | 0.12744 | 0.03133 | 0.13512 | 0.20716 | 0.54  | 0.2022  | 0.13621 | 0.17817 |
| 0.544 | 0.19425 | 0.21332 | 0.40039 | 0.06496 | 0.544 | 0.13462 | 0.12144 | 0.15709 | 0.12579 | 0.544 | 0.13031 | 0.03366 | 0.13677 | 0.21062 | 0.544 | 0.20242 | 0.13925 | 0.18058 |
| 0.548 | 0.19835 | 0.21578 | 0.402   | 0.06761 | 0.548 | 0.13721 | 0.12423 | 0.15991 | 0.12829 | 0.548 | 0.13286 | 0.03599 | 0.13832 | 0.21407 | 0.548 | 0.20258 | 0.1423  | 0.18334 |
| 0.552 | 0.20282 | 0.21849 | 0.40409 | 0.07025 | 0.552 | 0.1398  | 0.1273  | 0.16308 | 0.1308  | 0.552 | 0.13604 | 0.03936 | 0.14006 | 0.21795 | 0.552 | 0.20325 | 0.14581 | 0.18643 |
| 0.556 | 0.20766 | 0.22095 | 0.40619 | 0.07319 | 0.556 | 0.14286 | 0.13037 | 0.16626 | 0.1335  | 0.556 | 0.13923 | 0.04247 | 0.1419  | 0.22184 | 0.556 | 0.20358 | 0.14931 | 0.18919 |
| 0.56  | 0.21251 | 0.2239  | 0.40845 | 0.07613 | 0.56  | 0.14616 | 0.134   | 0.16978 | 0.13645 | 0.56  | 0.14273 | 0.04635 | 0.14392 | 0.22572 | 0.56  | 0.20424 | 0.15282 | 0.19263 |
| 0.564 | 0.21735 | 0.22661 | 0.4107  | 0.07966 | 0.564 | 0.14922 | 0.13735 | 0.17331 | 0.13935 | 0.564 | 0.14591 | 0.05023 | 0.1459  | 0.23004 | 0.564 | 0.20485 | 0.1568  | 0.19573 |
| 0.568 | 0.22238 | 0.22956 | 0.41328 | 0.08319 | 0.568 | 0.15275 | 0.14098 | 0.17684 | 0.1424  | 0.568 | 0.14942 | 0.05463 | 0.14806 | 0.23479 | 0.568 | 0.20584 | 0.16078 | 0.19952 |
| 0.572 | 0.22779 | 0.23276 | 0.41618 | 0.08701 | 0.572 | 0.15652 | 0.14517 | 0.18107 | 0.14575 | 0.572 | 0.15324 | 0.05955 | 0.15041 | 0.23997 | 0.572 | 0.20717 | 0.16522 | 0.20331 |
| 0.576 | 0.23338 | 0.23595 | 0.41908 | 0.09112 | 0.576 | 0.16076 | 0.14908 | 0.18495 | 0.1491  | 0.576 | 0.15674 | 0.06499 | 0.15277 | 0.24471 | 0.576 | 0.20849 | 0.16944 | 0.20675 |
| 0.58  | 0.2386  | 0.23915 | 0.42182 | 0.09524 | 0.58  | 0.16476 | 0.15355 | 0.18883 | 0.1525  | 0.58  | 0.16024 | 0.07043 | 0.15526 | 0.24989 | 0.58  | 0.20982 | 0.17365 | 0.21088 |
| 0.584 | 0.24419 | 0.2426  | 0.42489 | 0.09965 | 0.584 | 0.169   | 0.15801 | 0.19306 | 0.1562  | 0.584 | 0.16438 | 0.07639 | 0.1578  | 0.2555  | 0.584 | 0.21147 | 0.17833 | 0.21467 |
| 0.588 | 0.24978 | 0.24604 | 0.42795 | 0.10464 | 0.588 | 0.17371 | 0.16276 | 0.19764 | 0.16001 | 0.588 | 0.16852 | 0.08234 | 0.16058 | 0.26111 | 0.588 | 0.2133  | 0.18301 | 0.2188  |
| 0.592 | 0.25537 | 0.24973 | 0.43101 | 0.10905 | 0.592 | 0.17819 | 0.16778 | 0.20188 | 0.16381 | 0.592 | 0.17235 | 0.08881 | 0.16354 | 0.26716 | 0.592 | 0.21534 | 0.18768 | 0.22259 |
| 0.596 | 0.26077 | 0.25317 | 0.43424 | 0.11376 | 0.596 | 0.18289 | 0.17281 | 0.20611 | 0.16791 | 0.596 | 0.17617 | 0.09503 | 0.16651 | 0.27363 | 0.596 | 0.21744 | 0.19236 | 0.22672 |
| 0.6   | 0.26599 | 0.25686 | 0.4373  | 0.11846 | 0.6   | 0.1876  | 0.17811 | 0.21069 | 0.17191 | 0.6   | 0.17999 | 0.10357 | 0.16962 | 0.2801  | 0.6   | 0.21987 | 0.19728 | 0.2305  |
| 0.604 | 0.27139 | 0.26031 | 0.44052 | 0.12316 | 0.604 | 0.19231 | 0.18342 | 0.21598 | 0.17601 | 0.604 | 0.18413 | 0.11031 | 0.17286 | 0.28658 | 0.604 | 0.22235 | 0.20219 | 0.23464 |
| 0.608 | 0.27642 | 0.26375 | 0.44375 | 0.12787 | 0.608 | 0.19726 | 0.18872 | 0.22057 | 0.18021 | 0.608 | 0.18795 | 0.11652 | 0.1762  | 0.29391 | 0.608 | 0.22506 | 0.20687 | 0.23842 |
| 0.612 | 0.28108 | 0.26719 | 0.44649 | 0.13228 | 0.612 | 0.20197 | 0.1943  | 0.22515 | 0.18411 | 0.612 | 0.19177 | 0.12222 | 0.17955 | 0.30082 | 0.612 | 0.22787 | 0.21131 | 0.24221 |
| 0.616 | 0.28537 | 0.27064 | 0.44955 | 0.13668 | 0.616 | 0.20668 | 0.19989 | 0.22974 | 0.18827 | 0.616 | 0.19527 | 0.12765 | 0.18293 | 0.30816 | 0.616 | 0.2308  | 0.21599 | 0.246   |
| 0.62  | 0.28965 | 0.27384 | 0.45229 | 0.1408  | 0.62  | 0.21139 | 0.20547 | 0.23432 | 0.19247 | 0.62  | 0.19846 | 0.13283 | 0.18651 | 0.31549 | 0.62  | 0.23406 | 0.22044 | 0.24978 |
| 0.624 | 0.29338 | 0.27703 | 0.45487 | 0.14462 | 0.624 | 0.2161  | 0.21078 | 0.23891 | 0.19642 | 0.624 | 0.20196 | 0.13698 | 0.19009 | 0.32283 | 0.624 | 0.23737 | 0.22488 | 0.25288 |
| 0.628 | 0.29674 | 0.27999 | 0.45712 | 0.14785 | 0.628 | 0.22034 | 0.21636 | 0.24314 | 0.20037 | 0.628 | 0.20483 | 0.14112 | 0.19362 | 0.33017 | 0.628 | 0.2409  | 0.22886 | 0.25598 |
| 0.632 | 0.29953 | 0.28269 | 0.45922 | 0.15138 | 0.632 | 0.22457 | 0.22138 | 0.24737 | 0.20412 | 0.632 | 0.20769 | 0.14448 | 0.19729 | 0.33751 | 0.632 | 0.24427 | 0.2326  | 0.25874 |
| 0.636 | 0.30214 | 0.2854  | 0.46115 | 0.15403 | 0.636 | 0.22881 | 0.22669 | 0.25125 | 0.20807 | 0.636 | 0.21024 | 0.14733 | 0.20105 | 0.34441 | 0.636 | 0.24803 | 0.23635 | 0.26149 |
| 0.64  | 0.30456 | 0.28761 | 0.46277 | 0.15667 | 0.64  | 0.23282 | 0.23116 | 0.25478 | 0.21132 | 0.64  | 0.21279 | 0.1494  | 0.20468 | 0.35175 | 0.64  | 0.25162 | 0.23986 | 0.2639  |
| 0.644 | 0.30624 | 0.28958 | 0.46389 | 0.15873 | 0.644 | 0.23635 | 0.23562 | 0.25831 | 0.21427 | 0.644 | 0.2147  | 0.15096 | 0.20807 | 0.35822 | 0.644 | 0.2552  | 0.24313 | 0.26597 |
| 0.648 | 0.30754 | 0.29155 | 0.46518 | 0.16049 | 0.648 | 0.23964 | 0.23981 | 0.26148 | 0.21693 | 0.648 | 0.21661 | 0.15225 | 0.21164 | 0.3647  | 0.648 | 0.25896 | 0.24594 | 0.26769 |
| 0.652 | 0.30847 | 0.29278 | 0.46583 | 0.16226 | 0.652 | 0.24271 | 0.24344 | 0.2643  | 0.21908 | 0.652 | 0.2182  | 0.15277 | 0.21498 | 0.37074 | 0.652 | 0.2626  | 0.24851 | 0.26941 |
| 0.656 | 0.30903 | 0.29425 | 0.46615 | 0.16343 | 0.656 | 0.24577 | 0.24679 | 0.26677 | 0.22103 | 0.656 | 0.21948 | 0.15303 | 0.21842 | 0.37635 | 0.656 | 0.26619 | 0.25085 | 0.27044 |
| 0.66  | 0.30941 | 0.29524 | 0.46631 | 0.16432 | 0.66  | 0.24812 | 0.24958 | 0.26889 | 0.22253 | 0.66  | 0.22075 | 0.15303 | 0.22148 | 0.38153 | 0.66  | 0.26989 | 0.25296 | 0.27182 |
| 0.664 | 0.30941 | 0.29573 | 0.46599 | 0.1652  | 0.664 | 0.25048 | 0.25181 | 0.27065 | 0.22373 | 0.664 | 0.22139 | 0.15277 | 0.22449 | 0.38628 | 0.664 | 0.27331 | 0.2546  | 0.27251 |
| 0.668 | 0.30922 | 0.29622 | 0.46583 | 0.16549 | 0.668 | 0.25236 | 0.25377 | 0.27241 | 0.22458 | 0.668 | 0.22234 | 0.15225 | 0.22732 | 0.39059 | 0.668 | 0.27685 | 0.25624 | 0.27285 |
| 0.672 | 0.30885 | 0.29671 | 0.46534 | 0.16608 | 0.672 | 0.25424 | 0.25572 | 0.27382 | 0.22543 | 0.672 | 0.22298 | 0.15173 | 0.23023 | 0.39491 | 0.672 | 0.28038 | 0.25764 | 0.27354 |
| 0.676 | 0.3081  | 0.29647 | 0.46406 | 0.16608 | 0.676 | 0.25542 | 0.25684 | 0.27453 | 0.22563 | 0.676 | 0.22298 | 0.15096 | 0.23263 | 0.39793 | 0.676 | 0.28342 | 0.25857 | 0.27354 |
| 0.68  | 0.30736 | 0.29622 | 0.46309 | 0.16608 | 0.68  | 0.25636 | 0.2574  | 0.27523 | 0.22563 | 0.68  | 0.22298 | 0.15018 | 0.23503 | 0.40052 | 0.68  | 0.28651 | 0.25928 | 0.2732  |
| 0.684 | 0.30624 | 0.29573 | 0.46164 | 0.16608 | 0.684 | 0.25707 | 0.25768 | 0.27629 | 0.22533 | 0.684 | 0.22298 | 0.14966 | 0.23734 | 0.4     |       |         |         |         |



|       |         |         |         |         |       |         |         |         |         |       |         |         |         |         |       |         |         |         |
|-------|---------|---------|---------|---------|-------|---------|---------|---------|---------|-------|---------|---------|---------|---------|-------|---------|---------|---------|
| 0.876 | 0.30605 | 0.26449 | 0.38524 | 0.22634 | 0.876 | 0.30087 | 0.28615 | 0.31615 | 0.24849 | 0.876 | 0.25037 | 0.21699 | 0.29189 | 0.40052 | 0.876 | 0.35978 | 0.30256 | 0.26872 |
| 0.88  | 0.30736 | 0.26498 | 0.3854  | 0.2284  | 0.88  | 0.30252 | 0.28783 | 0.31791 | 0.24979 | 0.88  | 0.25196 | 0.21802 | 0.29363 | 0.40181 | 0.88  | 0.36171 | 0.30373 | 0.26941 |
| 0.884 | 0.30829 | 0.26572 | 0.38556 | 0.22957 | 0.884 | 0.30417 | 0.2895  | 0.31967 | 0.25119 | 0.884 | 0.25355 | 0.21906 | 0.29537 | 0.40311 | 0.884 | 0.36354 | 0.3049  | 0.2701  |
| 0.888 | 0.30941 | 0.26646 | 0.38556 | 0.23133 | 0.888 | 0.30581 | 0.2909  | 0.32108 | 0.25274 | 0.888 | 0.25482 | 0.22035 | 0.29716 | 0.4044  | 0.888 | 0.36525 | 0.30607 | 0.27079 |
| 0.892 | 0.31071 | 0.26719 | 0.38572 | 0.2328  | 0.892 | 0.30723 | 0.29257 | 0.3232  | 0.25429 | 0.892 | 0.25642 | 0.22139 | 0.29895 | 0.4057  | 0.892 | 0.36707 | 0.30747 | 0.27148 |
| 0.896 | 0.31202 | 0.26818 | 0.38604 | 0.23427 | 0.896 | 0.30888 | 0.29425 | 0.32461 | 0.25544 | 0.896 | 0.25833 | 0.22268 | 0.30059 | 0.40699 | 0.896 | 0.36884 | 0.30864 | 0.27216 |
| 0.9   | 0.31313 | 0.26916 | 0.38636 | 0.23516 | 0.9   | 0.31005 | 0.29564 | 0.32602 | 0.25694 | 0.9   | 0.2596  | 0.22372 | 0.30196 | 0.40785 | 0.9   | 0.37044 | 0.31005 | 0.27251 |
| 0.904 | 0.31462 | 0.2699  | 0.38669 | 0.23692 | 0.904 | 0.3117  | 0.29704 | 0.32743 | 0.25874 | 0.904 | 0.26119 | 0.22527 | 0.30379 | 0.40958 | 0.904 | 0.3722  | 0.31145 | 0.2732  |
| 0.908 | 0.31612 | 0.27088 | 0.38717 | 0.23839 | 0.908 | 0.31335 | 0.29844 | 0.32884 | 0.26034 | 0.908 | 0.2631  | 0.22657 | 0.3053  | 0.41088 | 0.908 | 0.37375 | 0.31285 | 0.27389 |
| 0.912 | 0.31742 | 0.27211 | 0.38749 | 0.23956 | 0.912 | 0.31453 | 0.29955 | 0.3299  | 0.26219 | 0.912 | 0.26438 | 0.22812 | 0.30666 | 0.41217 | 0.912 | 0.37546 | 0.31402 | 0.27457 |
| 0.916 | 0.31872 | 0.2731  | 0.38798 | 0.24074 | 0.916 | 0.31594 | 0.30095 | 0.33096 | 0.26384 | 0.916 | 0.26629 | 0.22941 | 0.30822 | 0.4139  | 0.916 | 0.37695 | 0.31543 | 0.27526 |
| 0.92  | 0.32021 | 0.27433 | 0.38846 | 0.24192 | 0.92  | 0.31735 | 0.30207 | 0.33237 | 0.26564 | 0.92  | 0.26788 | 0.23123 | 0.30944 | 0.41519 | 0.92  | 0.37839 | 0.31683 | 0.27561 |
| 0.924 | 0.32208 | 0.2758  | 0.3891  | 0.24339 | 0.924 | 0.31877 | 0.30346 | 0.33378 | 0.26769 | 0.924 | 0.26979 | 0.2333  | 0.31114 | 0.41692 | 0.924 | 0.37993 | 0.31847 | 0.2763  |
| 0.928 | 0.32394 | 0.27703 | 0.38959 | 0.24486 | 0.928 | 0.32018 | 0.30486 | 0.33519 | 0.26969 | 0.928 | 0.2717  | 0.23537 | 0.3125  | 0.41864 | 0.928 | 0.38137 | 0.31987 | 0.27698 |
| 0.932 | 0.32562 | 0.27826 | 0.39007 | 0.24603 | 0.932 | 0.32183 | 0.30597 | 0.33625 | 0.2715  | 0.932 | 0.27361 | 0.23718 | 0.31382 | 0.41994 | 0.932 | 0.38281 | 0.32128 | 0.27767 |
| 0.936 | 0.32748 | 0.27974 | 0.39104 | 0.2478  | 0.936 | 0.32324 | 0.30737 | 0.33766 | 0.2738  | 0.936 | 0.27552 | 0.23951 | 0.31523 | 0.42167 | 0.936 | 0.38419 | 0.32291 | 0.27836 |
| 0.94  | 0.32953 | 0.28146 | 0.39201 | 0.24927 | 0.94  | 0.32489 | 0.30877 | 0.33907 | 0.27625 | 0.94  | 0.27775 | 0.2421  | 0.31664 | 0.42382 | 0.94  | 0.38573 | 0.32479 | 0.27939 |
| 0.944 | 0.3314  | 0.28318 | 0.39281 | 0.25132 | 0.944 | 0.32654 | 0.31016 | 0.34048 | 0.27845 | 0.944 | 0.27998 | 0.24469 | 0.31824 | 0.42598 | 0.944 | 0.38717 | 0.32666 | 0.28043 |
| 0.948 | 0.33363 | 0.28491 | 0.39362 | 0.25279 | 0.948 | 0.32842 | 0.31156 | 0.34154 | 0.28085 | 0.948 | 0.28221 | 0.24728 | 0.31961 | 0.42771 | 0.948 | 0.3886  | 0.32853 | 0.28112 |
| 0.952 | 0.33605 | 0.28687 | 0.39475 | 0.25485 | 0.952 | 0.3303  | 0.31323 | 0.3433  | 0.2833  | 0.952 | 0.28412 | 0.25039 | 0.32125 | 0.42987 | 0.952 | 0.39009 | 0.33017 | 0.28215 |
| 0.956 | 0.33866 | 0.28909 | 0.39587 | 0.25691 | 0.956 | 0.33242 | 0.31519 | 0.34471 | 0.28595 | 0.956 | 0.28699 | 0.25324 | 0.32285 | 0.43246 | 0.956 | 0.39181 | 0.33227 | 0.28318 |
| 0.96  | 0.34127 | 0.29106 | 0.39732 | 0.25897 | 0.96  | 0.33454 | 0.31714 | 0.34648 | 0.2888  | 0.96  | 0.28954 | 0.2566  | 0.32464 | 0.43461 | 0.96  | 0.3933  | 0.33461 | 0.28456 |
| 0.964 | 0.34369 | 0.29327 | 0.39845 | 0.26132 | 0.964 | 0.33643 | 0.31854 | 0.34824 | 0.29105 | 0.964 | 0.29176 | 0.25971 | 0.32615 | 0.43677 | 0.964 | 0.39462 | 0.33672 | 0.28594 |
| 0.968 | 0.34649 | 0.29548 | 0.40006 | 0.26396 | 0.968 | 0.33878 | 0.32077 | 0.35036 | 0.29405 | 0.968 | 0.29463 | 0.26359 | 0.32808 | 0.43979 | 0.968 | 0.39644 | 0.33906 | 0.28731 |
| 0.972 | 0.34966 | 0.29819 | 0.40152 | 0.26661 | 0.972 | 0.34114 | 0.323   | 0.35247 | 0.29715 | 0.972 | 0.2975  | 0.26748 | 0.3301  | 0.44238 | 0.972 | 0.39821 | 0.34163 | 0.28869 |
| 0.976 | 0.35264 | 0.30065 | 0.40329 | 0.26925 | 0.976 | 0.34373 | 0.32524 | 0.35459 | 0.30026 | 0.976 | 0.30036 | 0.2711  | 0.33203 | 0.44497 | 0.976 | 0.39998 | 0.34444 | 0.29041 |
| 0.98  | 0.35581 | 0.3036  | 0.40506 | 0.27219 | 0.98  | 0.34655 | 0.32775 | 0.3567  | 0.30341 | 0.98  | 0.30355 | 0.2755  | 0.33415 | 0.44799 | 0.98  | 0.40186 | 0.34725 | 0.29248 |
| 0.984 | 0.35879 | 0.30631 | 0.40683 | 0.27513 | 0.984 | 0.34914 | 0.33054 | 0.35953 | 0.30666 | 0.984 | 0.30673 | 0.27965 | 0.33627 | 0.45101 | 0.984 | 0.40362 | 0.35005 | 0.2942  |
| 0.988 | 0.36233 | 0.30951 | 0.40877 | 0.27837 | 0.988 | 0.3522  | 0.33333 | 0.36235 | 0.31016 | 0.988 | 0.30992 | 0.28405 | 0.33862 | 0.45447 | 0.988 | 0.40567 | 0.35286 | 0.29626 |
| 0.992 | 0.3655  | 0.31246 | 0.41119 | 0.28189 | 0.992 | 0.3555  | 0.33668 | 0.36517 | 0.31381 | 0.992 | 0.31342 | 0.28871 | 0.34102 | 0.45792 | 0.992 | 0.40754 | 0.3559  | 0.29833 |
| 0.996 | 0.36866 | 0.31565 | 0.41328 | 0.28513 | 0.996 | 0.35856 | 0.33948 | 0.36799 | 0.31736 | 0.996 | 0.3166  | 0.29311 | 0.34337 | 0.46094 | 0.996 | 0.40947 | 0.35871 | 0.3004  |
| 1     | 0.3722  | 0.31885 | 0.4157  | 0.28865 | 1     | 0.36186 | 0.34283 | 0.37116 | 0.32121 | 1     | 0.32011 | 0.29777 | 0.34596 | 0.46439 | 1     | 0.41174 | 0.36199 | 0.30246 |
| 1.004 | 0.37556 | 0.3223  | 0.41812 | 0.29248 | 1.004 | 0.36539 | 0.34645 | 0.37434 | 0.32516 | 1.004 | 0.32361 | 0.30295 | 0.34864 | 0.46828 | 1.004 | 0.41389 | 0.36526 | 0.30487 |
| 1.008 | 0.37891 | 0.32549 | 0.42086 | 0.296   | 1.008 | 0.36892 | 0.35008 | 0.37787 | 0.32922 | 1.008 | 0.32743 | 0.30787 | 0.35137 | 0.47173 | 1.008 | 0.41599 | 0.3683  | 0.30728 |
| 1.012 | 0.38208 | 0.32894 | 0.42344 | 0.29982 | 1.012 | 0.37245 | 0.35343 | 0.38139 | 0.33332 | 1.012 | 0.33125 | 0.31279 | 0.35425 | 0.47562 | 1.012 | 0.41836 | 0.37181 | 0.30969 |
| 1.016 | 0.38525 | 0.33238 | 0.42618 | 0.30335 | 1.016 | 0.37646 | 0.35734 | 0.38492 | 0.33762 | 1.016 | 0.33507 | 0.31797 | 0.35721 | 0.4795  | 1.016 | 0.42057 | 0.37532 | 0.31245 |
| 1.02  | 0.3886  | 0.33607 | 0.42908 | 0.30747 | 1.02  | 0.38046 | 0.36153 | 0.38845 | 0.34212 | 1.02  | 0.33921 | 0.32341 | 0.36041 | 0.48382 | 1.02  | 0.42344 | 0.37883 | 0.3152  |
| 1.024 | 0.39196 | 0.33952 | 0.43214 | 0.31158 | 1.024 | 0.38423 | 0.36572 | 0.39233 | 0.34672 | 1.024 | 0.34335 | 0.32859 | 0.36418 | 0.4877  | 1.024 | 0.42609 | 0.38281 | 0.3183  |
| 1.028 | 0.39513 | 0.34296 | 0.43488 | 0.3154  | 1.028 | 0.388   | 0.36991 | 0.39621 | 0.35102 | 1.028 | 0.34718 | 0.33402 | 0.36747 | 0.49202 | 1.028 | 0.42852 | 0.38608 | 0.32105 |
| 1.032 | 0.39867 | 0.3469  | 0.43827 | 0.31952 | 1.032 | 0.39223 | 0.37437 | 0.40044 | 0.35617 | 1.032 | 0.35163 | 0.33946 | 0.37123 | 0.49633 | 1.032 | 0.43184 | 0.39006 | 0.32415 |
| 1.036 | 0.40221 | 0.35059 | 0.44165 | 0.32363 | 1.036 | 0.39624 | 0.37884 | 0.40467 | 0.36133 | 1.036 | 0.35577 | 0.34516 | 0.375   | 0.50065 | 1.036 | 0.4346  | 0.3938  | 0.32725 |
| 1.04  | 0.40556 | 0.35403 | 0.44504 | 0.32775 | 1.04  | 0.40048 | 0.38358 | 0.4089  | 0.36633 | 1.04  | 0.36023 | 0.3506  | 0.37877 | 0.50539 | 1.04  | 0.43736 | 0.39778 | 0.33035 |
| 1.044 | 0.40929 | 0.35797 | 0.44842 | 0.33186 | 1.044 | 0.40471 | 0.38833 | 0.41384 | 0.37173 | 1.044 | 0.36469 | 0.35629 | 0.383   | 0.50971 | 1.044 | 0.44067 | 0.40176 | 0.33379 |
| 1.048 | 0.41301 | 0.36166 | 0.45181 | 0.33598 | 1.048 | 0.40895 | 0.39308 | 0.41807 | 0.37708 | 1.048 | 0.36947 | 0.36199 | 0.38677 | 0.51446 | 1.048 | 0.44398 | 0.40574 | 0.33758 |
| 1.052 | 0.41674 | 0.36584 | 0.45567 | 0.34039 | 1.052 | 0.41343 | 0.39838 | 0.42266 | 0.38268 | 1.052 | 0.37424 | 0.36794 | 0.39147 | 0.51921 | 1.052 | 0.4473  | 0.40995 | 0.34102 |
| 1.056 | 0.42084 | 0.37002 | 0.45954 | 0.34509 | 1.056 | 0.41814 | 0.40341 | 0.42759 | 0.38829 | 1.056 | 0.37934 | 0.37364 | 0.39618 | 0.52438 | 1.056 | 0.45116 | 0.41439 | 0.34481 |
| 1.06  | 0.42475 | 0.37395 | 0.46325 | 0.3495  | 1.06  | 0.42238 | 0.40843 | 0.43218 | 0.39429 | 1.06  | 0.3838  | 0.3796  | 0.40041 | 0.52913 | 1.06  | 0.45448 | 0.4186  | 0.34894 |
| 1.064 | 0.42885 | 0.37863 | 0.4676  | 0.3542  | 1.064 | 0.42708 | 0.41346 | 0.43676 | 0.40029 | 1.064 | 0.38921 | 0.38581 | 0.40512 | 0.53388 | 1.064 | 0.45834 | 0.42305 | 0.35273 |
| 1.068 | 0.43351 | 0.3833  | 0.47179 | 0.3592  | 1.068 | 0.43203 | 0.41904 | 0.44241 | 0.40679 | 1.068 | 0.39462 | 0.39177 | 0.4103  | 0.53949 | 1.068 | 0.46276 | 0.42773 | 0.3572  |
| 1.072 | 0.4378  | 0.38798 | 0.47614 | 0.3639  | 1.072 | 0.4365  | 0.42434 | 0.44734 | 0.41279 | 1.072 | 0.39972 | 0.39772 | 0.41547 | 0.54467 | 1.072 | 0.46662 | 0.43241 | 0.36202 |
| 1.076 | 0.44246 | 0.39265 | 0.48066 | 0.3689  | 1.076 | 0.44145 | 0.42965 | 0.45263 | 0.4188  | 1.076 | 0.40513 | 0.40394 | 0.42065 | 0.54985 | 1.076 | 0.47104 | 0.43732 | 0.3665  |
| 1.08  | 0.4473  | 0.39782 | 0.48549 | 0.3739  | 1.08  | 0.44663 | 0.43551 | 0.45792 | 0.4253  | 1.08  | 0.41087 | 0.40989 | 0.4263  | 0.55546 | 1.08  | 0.47546 | 0.44247 | 0.37132 |
| 1.084 | 0.45271 | 0.40347 | 0.49065 | 0.37948 | 1.084 | 0.45181 | 0.44165 | 0.46357 | 0.4318  | 1.084 | 0.41692 | 0.41688 | 0.43195 | 0.5615  | 1.084 | 0.48043 | 0.44808 | 0.37683 |
| 1.088 | 0.45792 | 0.40913 | 0.49581 | 0.38477 | 1.088 | 0.45723 | 0.44724 | 0.46956 | 0.4383  | 1.088 | 0.42297 | 0.42361 | 0.43806 | 0.56754 | 1.088 | 0.4854  | 0.45323 | 0.38234 |
| 1.092 | 0.46314 | 0.41479 | 0.50081 | 0.39006 | 1.092 | 0.46217 | 0.4531  | 0.47485 | 0.44431 | 1.092 | 0.42902 | 0.42957 | 0.44371 | 0.57315 | 1.092 | 0.49036 | 0.45861 | 0.38785 |
| 1.096 | 0.46892 | 0.42094 | 0.50661 | 0.39594 | 1.096 | 0.46759 | 0.45952 | 0.4805  | 0.45081 | 1.096 | 0.43507 | 0.4363  | 0.44983 | 0.57877 | 1.096 | 0.49533 | 0       |         |

|       |         |         |         |         |       |         |         |         |         |       |         |         |         |         |       |         |         |         |
|-------|---------|---------|---------|---------|-------|---------|---------|---------|---------|-------|---------|---------|---------|---------|-------|---------|---------|---------|
| 1.288 | 0.96049 | 0.96261 | 0.9705  | 0.94386 | 1.288 | 0.95479 | 0.95477 | 0.95803 | 0.96949 | 1.288 | 0.95542 | 0.95857 | 0.97129 | 0.97669 | 1.288 | 0.98344 | 0.96444 | 0.96178 |
| 1.292 | 0.97354 | 0.97491 | 0.9805  | 0.96208 | 1.292 | 0.96962 | 0.96957 | 0.97143 | 0.97999 | 1.292 | 0.97007 | 0.97229 | 0.98117 | 0.98446 | 1.292 | 0.98951 | 0.97637 | 0.97418 |
| 1.296 | 0.98658 | 0.9877  | 0.99017 | 0.98031 | 1.296 | 0.98493 | 0.98492 | 0.98554 | 0.9905  | 1.296 | 0.98503 | 0.98628 | 0.99059 | 0.99223 | 1.296 | 0.99503 | 0.98807 | 0.98726 |
| 1.3   | 1       | 1       | 1       | 1       | 1.3   | 1       | 1       | 1       | 1       | 1.3   | 1       | 1       | 1       | 1       | 1.3   | 1       | 1       | 1       |

Raw table S2. Electrochemical fingerprints of *Acer sinopurpurascens*

## Acer sinopurpurascens

| Ethanol-ABS (Spring) |          |          |          | Ethanol-ABS (Summer) |          |          |          | Ethanol-ABS (Autumn) |       |          |          |          |          |  |  |
|----------------------|----------|----------|----------|----------------------|----------|----------|----------|----------------------|-------|----------|----------|----------|----------|--|--|
| 0.004                | 0.10116  | 0.13569  | 0.18921  | 0.004                | 0.12129  | 0.12074  | 0.1304   | 0.05296              | 0.004 | 0.1019   | 0.07714  | 0.06822  | 0.12051  |  |  |
| 0.008                | 0.0966   | 0.12854  | 0.18326  | 0.008                | 0.116    | 0.11522  | 0.12476  | 0.04965              | 0.008 | 0.09711  | 0.07315  | 0.06399  | 0.1111   |  |  |
| 0.012                | 0.09229  | 0.12264  | 0.17751  | 0.012                | 0.11198  | 0.11031  | 0.11977  | 0.047                | 0.012 | 0.09292  | 0.0698   | 0.06053  | 0.10292  |  |  |
| 0.016                | 0.08849  | 0.11767  | 0.17295  | 0.016                | 0.10838  | 0.10632  | 0.11564  | 0.0448               | 0.016 | 0.08924  | 0.067    | 0.05782  | 0.09638  |  |  |
| 0.02                 | 0.08494  | 0.11302  | 0.16858  | 0.02                 | 0.10499  | 0.10263  | 0.11174  | 0.04275              | 0.02  | 0.08593  | 0.06456  | 0.05522  | 0.09024  |  |  |
| 0.024                | 0.0819   | 0.10898  | 0.16442  | 0.024                | 0.10203  | 0.09925  | 0.10827  | 0.04117              | 0.024 | 0.08301  | 0.06226  | 0.05305  | 0.08574  |  |  |
| 0.028                | 0.07912  | 0.10525  | 0.16085  | 0.028                | 0.09949  | 0.09649  | 0.10501  | 0.03966              | 0.028 | 0.08074  | 0.06026  | 0.05128  | 0.08124  |  |  |
| 0.032                | 0.07582  | 0.10215  | 0.15728  | 0.032                | 0.09716  | 0.09373  | 0.10197  | 0.03836              | 0.032 | 0.07842  | 0.05852  | 0.04944  | 0.07756  |  |  |
| 0.036                | 0.07304  | 0.09873  | 0.15371  | 0.036                | 0.09483  | 0.09096  | 0.09915  | 0.03701              | 0.036 | 0.07607  | 0.05688  | 0.04782  | 0.07388  |  |  |
| 0.04                 | 0.07076  | 0.09593  | 0.15054  | 0.04                 | 0.09251  | 0.08851  | 0.09655  | 0.03575              | 0.04  | 0.07423  | 0.05524  | 0.04626  | 0.07142  |  |  |
| 0.044                | 0.06822  | 0.09314  | 0.14697  | 0.044                | 0.0906   | 0.08605  | 0.09395  | 0.03464              | 0.044 | 0.07215  | 0.05378  | 0.04496  | 0.06856  |  |  |
| 0.048                | 0.06569  | 0.09065  | 0.14359  | 0.048                | 0.08848  | 0.0839   | 0.09134  | 0.03357              | 0.048 | 0.07028  | 0.05231  | 0.04366  | 0.0661   |  |  |
| 0.052                | 0.06366  | 0.08786  | 0.14022  | 0.052                | 0.08637  | 0.08145  | 0.08874  | 0.03247              | 0.052 | 0.068    | 0.05075  | 0.04218  | 0.06283  |  |  |
| 0.056                | 0.06138  | 0.08538  | 0.13705  | 0.056                | 0.08446  | 0.0793   | 0.08614  | 0.0314               | 0.056 | 0.06592  | 0.04934  | 0.04103  | 0.06038  |  |  |
| 0.06                 | 0.05961  | 0.0832   | 0.13407  | 0.06                 | 0.08277  | 0.07746  | 0.08397  | 0.03045              | 0.06  | 0.06437  | 0.0482   | 0.03965  | 0.05833  |  |  |
| 0.064                | 0.05733  | 0.08103  | 0.1307   | 0.064                | 0.08044  | 0.075    | 0.08158  | 0.02954              | 0.064 | 0.06217  | 0.04693  | 0.03839  | 0.05588  |  |  |
| 0.068                | 0.0553   | 0.07854  | 0.12753  | 0.068                | 0.07854  | 0.07285  | 0.07919  | 0.02859              | 0.068 | 0.06001  | 0.0456   | 0.0372   | 0.05383  |  |  |
| 0.072                | 0.05353  | 0.07662  | 0.12436  | 0.072                | 0.07663  | 0.0707   | 0.07681  | 0.02758              | 0.072 | 0.05834  | 0.04435  | 0.03604  | 0.05179  |  |  |
| 0.076                | 0.05176  | 0.07454  | 0.12158  | 0.076                | 0.07473  | 0.06886  | 0.0742   | 0.0267               | 0.076 | 0.05654  | 0.04308  | 0.03492  | 0.05015  |  |  |
| 0.08                 | 0.04998  | 0.07264  | 0.11841  | 0.08                 | 0.07304  | 0.0664   | 0.07203  | 0.02579              | 0.08  | 0.0543   | 0.04186  | 0.03377  | 0.04852  |  |  |
| 0.084                | 0.04846  | 0.07056  | 0.11543  | 0.084                | 0.07092  | 0.06456  | 0.06943  | 0.02487              | 0.084 | 0.05247  | 0.04072  | 0.03239  | 0.04647  |  |  |
| 0.088                | 0.04669  | 0.0686   | 0.11206  | 0.088                | 0.06901  | 0.06241  | 0.06726  | 0.02402              | 0.088 | 0.05035  | 0.03958  | 0.03127  | 0.04442  |  |  |
| 0.092                | 0.04517  | 0.0669   | 0.10928  | 0.092                | 0.06732  | 0.06057  | 0.06509  | 0.02323              | 0.092 | 0.04843  | 0.03842  | 0.03026  | 0.04279  |  |  |
| 0.096                | 0.0439   | 0.065    | 0.10631  | 0.096                | 0.0652   | 0.05873  | 0.0627   | 0.02244              | 0.096 | 0.04644  | 0.03737  | 0.02907  | 0.04115  |  |  |
| 0.1                  | 0.04213  | 0.06317  | 0.10313  | 0.1                  | 0.0633   | 0.05627  | 0.06032  | 0.02159              | 0.1   | 0.04428  | 0.0362   | 0.02788  | 0.03952  |  |  |
| 0.104                | 0.04086  | 0.06155  | 0.10036  | 0.104                | 0.0614   | 0.05443  | 0.05815  | 0.02081              | 0.104 | 0.04249  | 0.03509  | 0.02676  | 0.03829  |  |  |
| 0.108                | 0.03934  | 0.05972  | 0.09718  | 0.108                | 0.05949  | 0.05259  | 0.05576  | 0.01999              | 0.108 | 0.04029  | 0.03393  | 0.02557  | 0.03706  |  |  |
| 0.112                | 0.03808  | 0.05808  | 0.09421  | 0.112                | 0.05737  | 0.05044  | 0.05337  | 0.01932              | 0.112 | 0.03821  | 0.0329   | 0.02434  | 0.03543  |  |  |
| 0.116                | 0.0363   | 0.05634  | 0.09123  | 0.116                | 0.05547  | 0.0486   | 0.0512   | 0.0185               | 0.116 | 0.03614  | 0.03185  | 0.02326  | 0.03379  |  |  |
| 0.12                 | 0.03504  | 0.05454  | 0.08826  | 0.12                 | 0.05357  | 0.04645  | 0.04903  | 0.01768              | 0.12  | 0.03434  | 0.03085  | 0.02207  | 0.03256  |  |  |
| 0.124                | 0.03352  | 0.05283  | 0.08528  | 0.124                | 0.05166  | 0.04461  | 0.04686  | 0.01715              | 0.124 | 0.0323   | 0.02983  | 0.02098  | 0.03093  |  |  |
| 0.128                | 0.03225  | 0.05093  | 0.08231  | 0.128                | 0.04976  | 0.04277  | 0.04448  | 0.01658              | 0.128 | 0.03027  | 0.02869  | 0.01986  | 0.02929  |  |  |
| 0.132                | 0.03073  | 0.04904  | 0.07933  | 0.132                | 0.04785  | 0.04062  | 0.04231  | 0.01582              | 0.132 | 0.02859  | 0.02764  | 0.01882  | 0.02765  |  |  |
| 0.136                | 0.02921  | 0.04711  | 0.07636  | 0.136                | 0.04595  | 0.03877  | 0.04014  | 0.01507              | 0.136 | 0.02659  | 0.02678  | 0.01773  | 0.02602  |  |  |
| 0.14                 | 0.02769  | 0.04534  | 0.07358  | 0.14                 | 0.04383  | 0.03724  | 0.03797  | 0.01447              | 0.14  | 0.02484  | 0.02564  | 0.01676  | 0.02438  |  |  |
| 0.144                | 0.02642  | 0.04342  | 0.07061  | 0.144                | 0.04193  | 0.03509  | 0.03602  | 0.01387              | 0.144 | 0.02296  | 0.02467  | 0.01571  | 0.02315  |  |  |
| 0.148                | 0.02465  | 0.04149  | 0.06783  | 0.148                | 0.03981  | 0.03325  | 0.03363  | 0.01318              | 0.148 | 0.02116  | 0.02364  | 0.01477  | 0.02152  |  |  |
| 0.152                | 0.02338  | 0.0395   | 0.06466  | 0.152                | 0.0379   | 0.03141  | 0.03168  | 0.01248              | 0.152 | 0.01949  | 0.02248  | 0.01372  | 0.02029  |  |  |
| 0.156                | 0.02136  | 0.03752  | 0.06168  | 0.156                | 0.03579  | 0.02926  | 0.02951  | 0.01179              | 0.156 | 0.01785  | 0.02145  | 0.01289  | 0.01865  |  |  |
| 0.16                 | 0.02009  | 0.03559  | 0.05871  | 0.16                 | 0.03388  | 0.02763  | 0.02755  | 0.01116              | 0.16  | 0.01633  | 0.02035  | 0.01192  | 0.01743  |  |  |
| 0.164                | 0.01857  | 0.03332  | 0.05553  | 0.164                | 0.03177  | 0.0257   | 0.02539  | 0.01037              | 0.164 | 0.01469  | 0.01921  | 0.01094  | 0.01579  |  |  |
| 0.168                | 0.01705  | 0.03118  | 0.05256  | 0.168                | 0.02986  | 0.02398  | 0.02343  | 0.00974              | 0.168 | 0.01306  | 0.01813  | 0.01004  | 0.01456  |  |  |
| 0.172                | 0.01553  | 0.02919  | 0.04958  | 0.172                | 0.02796  | 0.02217  | 0.02148  | 0.00898              | 0.172 | 0.0117   | 0.01696  | 0.00914  | 0.01334  |  |  |
| 0.176                | 0.01401  | 0.02711  | 0.04641  | 0.176                | 0.02584  | 0.02029  | 0.01953  | 0.00823              | 0.176 | 0.01026  | 0.01586  | 0.00816  | 0.01203  |  |  |
| 0.18                 | 0.01249  | 0.02494  | 0.04324  | 0.18                 | 0.02372  | 0.01854  | 0.01757  | 0.00738              | 0.18  | 0.00886  | 0.01455  | 0.00726  | 0.01047  |  |  |
| 0.184                | 0.01072  | 0.02276  | 0.04026  | 0.184                | 0.02182  | 0.01679  | 0.01562  | 0.00656              | 0.184 | 0.00759  | 0.01331  | 0.00636  | 0.00888  |  |  |
| 0.188                | 0.0097   | 0.02062  | 0.03709  | 0.188                | 0.01991  | 0.0151   | 0.01389  | 0.00589              | 0.188 | 0.00631  | 0.01225  | 0.00556  | 0.00757  |  |  |
| 0.192                | 0.00844  | 0.01857  | 0.03411  | 0.192                | 0.01801  | 0.01357  | 0.01215  | 0.00514              | 0.192 | 0.00519  | 0.011    | 0.00462  | 0.00634  |  |  |
| 0.196                | 0.00692  | 0.0164   | 0.03114  | 0.196                | 0.01611  | 0.0117   | 0.01041  | 0.00422              | 0.196 | 0.00395  | 0.00981  | 0.00383  | 0.00503  |  |  |
| 0.2                  | 0.00565  | 0.01441  | 0.02816  | 0.2                  | 0.0142   | 0.01035  | 0.0089   | 0.0035               | 0.2   | 0.00303  | 0.00862  | 0.00307  | 0.00389  |  |  |
| 0.204                | 0.00476  | 0.01252  | 0.02539  | 0.204                | 0.01251  | 0.00881  | 0.00738  | 0.0029               | 0.204 | 0.0022   | 0.00751  | 0.00246  | 0.00319  |  |  |
| 0.208                | 0.0037   | 0.0105   | 0.02281  | 0.208                | 0.01071  | 0.00737  | 0.00586  | 0.00224              | 0.208 | 0.00132  | 0.00624  | 0.00173  | 0.002    |  |  |
| 0.212                | 0.00276  | 0.00879  | 0.02003  | 0.212                | 0.0091   | 0.00589  | 0.00456  | 0.00151              | 0.212 | 7.19E-04 | 0.00513  | 0.00119  | 0.00115  |  |  |
| 0.216                | 0.00195  | 0.00711  | 0.01765  | 0.216                | 0.0076   | 0.00476  | 0.00347  | 0.00107              | 0.216 | 2.80E-04 | 0.00413  | 6.50E-04 | 7.77E-04 |  |  |
| 0.22                 | 0.00137  | 0.00568  | 0.01527  | 0.22                 | 0.00616  | 0.00365  | 0.0026   | 7.25E-04             | 0.22  | 0        | 0.0031   | 3.25E-04 | 1.23E-04 |  |  |
| 0.224                | 8.11E-04 | 0.00435  | 0.01289  | 0.224                | 0.00502  | 0.00273  | 0.00174  | 3.15E-04             | 0.224 | 1.20E-04 | 0.00233  | 1.08E-04 | 0        |  |  |
| 0.228                | 3.55E-04 | 0.00311  | 0.01071  | 0.228                | 0.00372  | 0.0019   | 8.68E-04 | 3.15E-05             | 0.228 | 7.99E-05 | 0.00152  | 0        | 0        |  |  |
| 0.232                | 7.60E-05 | 0.00217  | 0.00893  | 0.232                | 0.00281  | 0.00126  | 4.34E-04 | 0                    | 0.232 | 5.99E-04 | 9.42E-04 | 1.08E-04 | 4.91E-04 |  |  |
| 0.236                | 0        | 0.00127  | 0.00714  | 0.236                | 0.00186  | 6.14E-04 | 0        | 1.26E-04             | 0.236 | 0.00144  | 4.71E-04 | 2.53E-04 | 0.00123  |  |  |
| 0.24                 | 0        | 7.14E-04 | 0.00555  | 0.24                 | 0.00119  | 2.46E-04 | 0        | 3.78E-04             | 0.24  | 0.00252  | 5.54E-05 | 5.78E-04 | 0.00213  |  |  |
| 0.244                | 2.03E-04 | 3.42E-04 | 0.00397  | 0.244                | 6.56E-04 | 9.21E-05 | 0        | 8.83E-04             | 0.244 | 0.00391  | 0        | 0.00134  | 0.00356  |  |  |
| 0.248                | 3.55E-04 | 0        | 0.00278  | 0.248                | 2.33E-04 | 0        | 2.17E-04 | 0.00148              | 0.248 | 0.00583  | 2.77E-05 | 0.00228  | 0.00536  |  |  |
| 0.252                | 0.00111  | 2.17E-04 | 0.00179  | 0.252                | 4.23E-05 | 3.68E-04 | 8.68E-04 | 0.00255              | 0.252 | 0.00815  | 2.77E-04 | 0.00339  | 0.00757  |  |  |
| 0.256                | 0.00182  | 4.97E-04 | 9.92E-04 | 0.256                | 0        | 7.37E-04 | 0.0013   | 0.00381              | 0.256 | 0.01094  | 7.76E-04 | 0.00509  | 0.01092  |  |  |
| 0.26                 | 0.00271  | 8.70E-04 | 3.97E-04 | 0.26                 | 2.12E-05 | 0.00126  | 0.00195  | 0.00536              | 0.26  | 0.01421  | 0.00147  | 0.00683  | 0.01456  |  |  |
| 0.264                | 0.004    | 0.0018   | 1.98E-04 | 0.264                | 3.39E-04 | 0.00218  | 0.00282  | 0.00731              | 0.264 | 0.01813  | 0.00247  | 0.00921  | 0.01947  |  |  |
| 0.268                | 0.00529  | 0.0028   | 0        | 0.268                | 8.47E    |          |          |                      |       |          |          |          |          |  |  |

|       |         |         |         |       |         |         |         |         |       |         |         |         |         |
|-------|---------|---------|---------|-------|---------|---------|---------|---------|-------|---------|---------|---------|---------|
| 0.368 | 0.24556 | 0.10308 | 0.08707 | 0.368 | 0.1088  | 0.10754 | 0.12411 | 0.17597 | 0.368 | 0.17146 | 0.12573 | 0.12694 | 0.15978 |
| 0.372 | 0.25721 | 0.1096  | 0.0958  | 0.372 | 0.11981 | 0.11767 | 0.13343 | 0.19154 | 0.372 | 0.18064 | 0.13571 | 0.13192 | 0.17614 |
| 0.376 | 0.26583 | 0.11519 | 0.10393 | 0.376 | 0.13039 | 0.12842 | 0.14168 | 0.20686 | 0.376 | 0.18983 | 0.14569 | 0.13832 | 0.19373 |
| 0.38  | 0.2714  | 0.12016 | 0.11166 | 0.38  | 0.14055 | 0.13886 | 0.14927 | 0.22073 | 0.38  | 0.19781 | 0.15512 | 0.1459  | 0.21214 |
| 0.384 | 0.27317 | 0.12358 | 0.11821 | 0.384 | 0.14922 | 0.14868 | 0.15535 | 0.23302 | 0.384 | 0.205   | 0.16399 | 0.1545  | 0.23014 |
| 0.388 | 0.27089 | 0.12606 | 0.12376 | 0.388 | 0.15663 | 0.15758 | 0.15969 | 0.24248 | 0.388 | 0.21019 | 0.17147 | 0.16338 | 0.24691 |
| 0.392 | 0.26583 | 0.1273  | 0.12773 | 0.392 | 0.16235 | 0.16557 | 0.16273 | 0.24973 | 0.392 | 0.21378 | 0.17757 | 0.17255 | 0.26205 |
| 0.396 | 0.25772 | 0.12792 | 0.13031 | 0.396 | 0.16594 | 0.17232 | 0.16424 | 0.2532  | 0.396 | 0.21498 | 0.18173 | 0.18187 | 0.27473 |
| 0.4   | 0.24733 | 0.12699 | 0.1315  | 0.4   | 0.16764 | 0.17723 | 0.16403 | 0.25383 | 0.4   | 0.21378 | 0.1845  | 0.19043 | 0.28373 |
| 0.404 | 0.23492 | 0.12544 | 0.1307  | 0.404 | 0.16764 | 0.18092 | 0.16273 | 0.25068 | 0.404 | 0.21019 | 0.18505 | 0.19845 | 0.28986 |
| 0.408 | 0.22175 | 0.12358 | 0.12892 | 0.408 | 0.16552 | 0.18307 | 0.16034 | 0.245   | 0.408 | 0.205   | 0.18395 | 0.20527 | 0.29191 |
| 0.412 | 0.20807 | 0.12109 | 0.12555 | 0.412 | 0.16213 | 0.18399 | 0.15687 | 0.23681 | 0.412 | 0.19781 | 0.1809  | 0.21091 | 0.29068 |
| 0.416 | 0.19413 | 0.1183  | 0.12098 | 0.416 | 0.15705 | 0.18337 | 0.15274 | 0.2264  | 0.416 | 0.18943 | 0.17646 | 0.21524 | 0.28577 |
| 0.42  | 0.18147 | 0.1155  | 0.11563 | 0.42  | 0.15134 | 0.18184 | 0.14841 | 0.21537 | 0.42  | 0.18024 | 0.17064 | 0.21849 | 0.27841 |
| 0.424 | 0.16956 | 0.11333 | 0.11027 | 0.424 | 0.14478 | 0.18    | 0.14407 | 0.20368 | 0.424 | 0.17106 | 0.16426 | 0.2203  | 0.269   |
| 0.428 | 0.15917 | 0.11115 | 0.10432 | 0.428 | 0.13822 | 0.17723 | 0.13973 | 0.19207 | 0.428 | 0.16188 | 0.15733 | 0.22138 | 0.25877 |
| 0.432 | 0.1498  | 0.1096  | 0.09837 | 0.432 | 0.13145 | 0.17447 | 0.13539 | 0.18101 | 0.432 | 0.15269 | 0.14985 | 0.22138 | 0.24732 |
| 0.436 | 0.14195 | 0.10836 | 0.09242 | 0.436 | 0.12489 | 0.17171 | 0.13148 | 0.17089 | 0.436 | 0.14447 | 0.14264 | 0.22066 | 0.23587 |
| 0.44  | 0.13511 | 0.10743 | 0.08707 | 0.44  | 0.11896 | 0.16894 | 0.12823 | 0.16191 | 0.44  | 0.13696 | 0.13571 | 0.21993 | 0.22482 |
| 0.444 | 0.12978 | 0.1068  | 0.08211 | 0.444 | 0.11367 | 0.16649 | 0.12541 | 0.15447 | 0.444 | 0.13049 | 0.12906 | 0.21885 | 0.2146  |
| 0.448 | 0.12548 | 0.1068  | 0.07775 | 0.448 | 0.1088  | 0.16403 | 0.12302 | 0.14854 | 0.448 | 0.12482 | 0.12307 | 0.21777 | 0.20478 |
| 0.452 | 0.12168 | 0.10712 | 0.07358 | 0.452 | 0.10457 | 0.16219 | 0.12085 | 0.14387 | 0.452 | 0.12015 | 0.11759 | 0.21632 | 0.19619 |
| 0.456 | 0.11914 | 0.10805 | 0.07021 | 0.456 | 0.10097 | 0.16096 | 0.11955 | 0.14075 | 0.456 | 0.11655 | 0.11296 | 0.2156  | 0.18923 |
| 0.46  | 0.11762 | 0.10929 | 0.06743 | 0.46  | 0.09822 | 0.16004 | 0.11868 | 0.13861 | 0.46  | 0.11388 | 0.10885 | 0.21452 | 0.1831  |
| 0.464 | 0.11636 | 0.11053 | 0.06525 | 0.464 | 0.09589 | 0.15973 | 0.11825 | 0.13757 | 0.464 | 0.11176 | 0.1055  | 0.21343 | 0.17819 |
| 0.468 | 0.11585 | 0.11239 | 0.06327 | 0.468 | 0.0942  | 0.16004 | 0.11825 | 0.13754 | 0.468 | 0.11049 | 0.10262 | 0.21307 | 0.17451 |
| 0.472 | 0.11585 | 0.11426 | 0.06208 | 0.472 | 0.09314 | 0.16035 | 0.11868 | 0.13811 | 0.472 | 0.10981 | 0.10048 | 0.21235 | 0.17205 |
| 0.476 | 0.11636 | 0.11674 | 0.06109 | 0.476 | 0.09208 | 0.16096 | 0.11977 | 0.13943 | 0.476 | 0.10989 | 0.09885 | 0.21235 | 0.17042 |
| 0.48  | 0.11712 | 0.11954 | 0.06089 | 0.48  | 0.09187 | 0.1625  | 0.12107 | 0.1412  | 0.48  | 0.11033 | 0.09771 | 0.21307 | 0.1696  |
| 0.484 | 0.11864 | 0.12233 | 0.06049 | 0.484 | 0.09187 | 0.16372 | 0.1228  | 0.14321 | 0.484 | 0.11116 | 0.09691 | 0.2138  | 0.17001 |
| 0.488 | 0.12016 | 0.12544 | 0.06069 | 0.488 | 0.09229 | 0.16587 | 0.12454 | 0.14577 | 0.488 | 0.11248 | 0.09649 | 0.21524 | 0.17123 |
| 0.492 | 0.12218 | 0.12885 | 0.06109 | 0.492 | 0.09272 | 0.16802 | 0.12693 | 0.1487  | 0.492 | 0.11424 | 0.09652 | 0.21705 | 0.17287 |
| 0.496 | 0.12446 | 0.13196 | 0.06168 | 0.496 | 0.09356 | 0.17017 | 0.12953 | 0.15185 | 0.496 | 0.11636 | 0.09685 | 0.21957 | 0.17492 |
| 0.5   | 0.127   | 0.13569 | 0.06267 | 0.5   | 0.09441 | 0.17263 | 0.13235 | 0.15519 | 0.5   | 0.11911 | 0.09741 | 0.22246 | 0.17819 |
| 0.504 | 0.12978 | 0.13941 | 0.06367 | 0.504 | 0.09568 | 0.17539 | 0.13539 | 0.15888 | 0.504 | 0.12187 | 0.09824 | 0.22571 | 0.18146 |
| 0.508 | 0.13308 | 0.14314 | 0.06525 | 0.508 | 0.09695 | 0.17846 | 0.13842 | 0.16273 | 0.508 | 0.12534 | 0.09935 | 0.22969 | 0.18555 |
| 0.512 | 0.13637 | 0.14718 | 0.06664 | 0.512 | 0.09843 | 0.18122 | 0.14168 | 0.1667  | 0.512 | 0.12917 | 0.10079 | 0.23402 | 0.19005 |
| 0.516 | 0.13967 | 0.15091 | 0.06843 | 0.516 | 0.09991 | 0.18429 | 0.14472 | 0.17061 | 0.516 | 0.13321 | 0.10206 | 0.23871 | 0.19537 |
| 0.52  | 0.14347 | 0.15525 | 0.07041 | 0.52  | 0.10182 | 0.18767 | 0.14797 | 0.17499 | 0.52  | 0.13816 | 0.10384 | 0.24377 | 0.2011  |
| 0.524 | 0.14727 | 0.15929 | 0.07259 | 0.524 | 0.10372 | 0.19105 | 0.15144 | 0.17924 | 0.524 | 0.14331 | 0.10583 | 0.24883 | 0.20723 |
| 0.528 | 0.15157 | 0.16364 | 0.07517 | 0.528 | 0.10563 | 0.19504 | 0.15491 | 0.18391 | 0.528 | 0.1487  | 0.10808 | 0.2546  | 0.21419 |
| 0.532 | 0.15588 | 0.16799 | 0.07755 | 0.532 | 0.10774 | 0.19872 | 0.1586  | 0.18854 | 0.532 | 0.15469 | 0.11027 | 0.26002 | 0.22114 |
| 0.536 | 0.16019 | 0.17233 | 0.08013 | 0.536 | 0.11007 | 0.20241 | 0.16229 | 0.1933  | 0.536 | 0.16068 | 0.1126  | 0.2658  | 0.2285  |
| 0.54  | 0.165   | 0.1773  | 0.0833  | 0.54  | 0.11261 | 0.2067  | 0.1662  | 0.19822 | 0.54  | 0.16747 | 0.11528 | 0.27194 | 0.23628 |
| 0.544 | 0.17007 | 0.18165 | 0.08647 | 0.544 | 0.11536 | 0.2107  | 0.17032 | 0.20333 | 0.544 | 0.17385 | 0.11822 | 0.2788  | 0.24446 |
| 0.548 | 0.17488 | 0.18631 | 0.08965 | 0.548 | 0.11811 | 0.21499 | 0.17422 | 0.20844 | 0.548 | 0.18064 | 0.12105 | 0.28494 | 0.25264 |
| 0.552 | 0.17995 | 0.19128 | 0.09302 | 0.552 | 0.12108 | 0.21929 | 0.17856 | 0.21348 | 0.552 | 0.18743 | 0.12415 | 0.2918  | 0.26123 |
| 0.556 | 0.18527 | 0.19625 | 0.09659 | 0.556 | 0.12404 | 0.2239  | 0.1829  | 0.21884 | 0.556 | 0.19422 | 0.1274  | 0.29866 | 0.26982 |
| 0.56  | 0.19084 | 0.20153 | 0.10016 | 0.56  | 0.12743 | 0.22881 | 0.18746 | 0.2242  | 0.56  | 0.20101 | 0.13072 | 0.30589 | 0.27964 |
| 0.564 | 0.19616 | 0.2065  | 0.10413 | 0.564 | 0.13081 | 0.23372 | 0.1918  | 0.22924 | 0.564 | 0.20739 | 0.13433 | 0.31275 | 0.28864 |
| 0.568 | 0.20199 | 0.21209 | 0.1077  | 0.568 | 0.13441 | 0.23863 | 0.19657 | 0.2346  | 0.568 | 0.21338 | 0.13765 | 0.31997 | 0.29804 |
| 0.572 | 0.20781 | 0.21737 | 0.11186 | 0.572 | 0.13822 | 0.24385 | 0.20135 | 0.23996 | 0.572 | 0.21937 | 0.14181 | 0.32756 | 0.30745 |
| 0.576 | 0.21339 | 0.22296 | 0.11603 | 0.576 | 0.14182 | 0.24938 | 0.20634 | 0.245   | 0.576 | 0.22417 | 0.14514 | 0.33478 | 0.31727 |
| 0.58  | 0.21896 | 0.22824 | 0.11999 | 0.58  | 0.14563 | 0.25429 | 0.21111 | 0.25036 | 0.58  | 0.22816 | 0.14874 | 0.342   | 0.32709 |
| 0.584 | 0.22479 | 0.23383 | 0.12416 | 0.584 | 0.14965 | 0.25982 | 0.2161  | 0.25541 | 0.584 | 0.23175 | 0.15235 | 0.34922 | 0.33691 |
| 0.588 | 0.23036 | 0.23973 | 0.12832 | 0.588 | 0.15367 | 0.26504 | 0.22109 | 0.26045 | 0.588 | 0.23455 | 0.15595 | 0.35645 | 0.34713 |
| 0.592 | 0.23593 | 0.24501 | 0.13249 | 0.592 | 0.15769 | 0.27056 | 0.22608 | 0.26518 | 0.592 | 0.23614 | 0.15983 | 0.36367 | 0.35654 |
| 0.596 | 0.241   | 0.2506  | 0.13645 | 0.596 | 0.16171 | 0.27578 | 0.23064 | 0.26991 | 0.596 | 0.23734 | 0.16343 | 0.37053 | 0.36636 |
| 0.6   | 0.24632 | 0.25619 | 0.14042 | 0.6   | 0.16552 | 0.28131 | 0.23563 | 0.27464 | 0.6   | 0.23734 | 0.16704 | 0.37739 | 0.37618 |
| 0.604 | 0.25164 | 0.26147 | 0.14439 | 0.604 | 0.16954 | 0.28683 | 0.2404  | 0.27936 | 0.604 | 0.23734 | 0.17092 | 0.38389 | 0.3864  |
| 0.608 | 0.25671 | 0.26675 | 0.14796 | 0.608 | 0.17356 | 0.29205 | 0.24539 | 0.28378 | 0.608 | 0.23614 | 0.17452 | 0.39039 | 0.39581 |
| 0.612 | 0.26101 | 0.27172 | 0.15153 | 0.612 | 0.17737 | 0.29727 | 0.24973 | 0.28819 | 0.612 | 0.23415 | 0.17812 | 0.39689 | 0.40563 |
| 0.616 | 0.26583 | 0.27669 | 0.1549  | 0.616 | 0.18118 | 0.30218 | 0.25429 | 0.29292 | 0.616 | 0.23215 | 0.18173 | 0.40303 | 0.41586 |
| 0.62  | 0.27039 | 0.28134 | 0.15827 | 0.62  | 0.18499 | 0.30709 | 0.25884 | 0.29733 | 0.62  | 0.22976 | 0.18561 | 0.40917 | 0.42526 |
| 0.624 | 0.27495 | 0.28569 | 0.16125 | 0.624 | 0.18859 | 0.31201 | 0.26296 | 0.30175 | 0.624 | 0.22696 | 0.18921 | 0.41531 | 0.43508 |
| 0.628 | 0.279   | 0.28973 | 0.16442 | 0.628 | 0.19197 | 0.31661 | 0.26687 | 0.30648 | 0.628 | 0.22417 | 0.19282 | 0.42073 | 0.4449  |
| 0.632 | 0.28305 | 0.29346 | 0.1672  | 0.632 | 0.19536 | 0.32091 | 0.27056 | 0.3112  | 0.632 | 0.22097 | 0.19642 | 0.42651 | 0.45513 |
| 0.636 | 0.28711 | 0.29718 | 0.17017 | 0.636 | 0.19854 | 0.32521 | 0.27446 | 0.31625 | 0.636 | 0.21858 | 0.20002 | 0.43192 | 0.46535 |
| 0.64  | 0.29091 | 0.30029 | 0.17295 | 0.64  | 0.2015  | 0.32889 | 0.27793 | 0.32129 | 0.64  | 0.21578 | 0.20363 | 0.43698 | 0.47517 |
| 0.644 | 0.29445 | 0.30308 | 0.17553 | 0.644 | 0.20446 | 0.33258 | 0.28097 | 0.32602 | 0.644 | 0.21338 | 0.20723 | 0.44204 | 0.48499 |
| 0.648 | 0.29775 | 0.30588 | 0.1781  | 0.648 | 0.207   | 0.33626 | 0.28401 | 0.33138 | 0.648 | 0.21139 | 0.21083 | 0.44637 | 0.4948  |
| 0.652 | 0.30079 | 0.30836 | 0.18048 | 0.652 | 0.20954 | 0.33964 | 0.28683 | 0.33642 | 0.652 | 0.20939 | 0.21444 | 0.45107 | 0.50462 |
| 0.656 | 0.30357 | 0.31054 | 0.18306 | 0.656 | 0.21187 | 0.3424  | 0.28943 | 0.34178 | 0.656 | 0.20739 | 0.21776 | 0.4554  | 0.51444 |
| 0.66  | 0.30585 | 0.31209 | 0.18524 | 0.66  | 0.21398 | 0.34516 | 0.29139 | 0.34651 | 0.66  | 0.2062  | 0.22081 | 0.45937 | 0.52344 |
| 0.664 | 0.30737 | 0.31364 | 0.18782 | 0.664 | 0.2161  | 0.34793 | 0.29356 | 0.35124 | 0.664 | 0.2054  | 0.22386 | 0.46371 | 0.53244 |
| 0.668 | 0.30889 | 0.31489 | 0.19    | 0.668 | 0       |         |         |         |       |         |         |         |         |

|       |         |         |         |       |         |         |         |         |       |         |         |         |         |
|-------|---------|---------|---------|-------|---------|---------|---------|---------|-------|---------|---------|---------|---------|
| 0.78  | 0.34462 | 0.33663 | 0.27013 | 0.78  | 0.28785 | 0.40779 | 0.33153 | 0.40956 | 0.78  | 0.2601  | 0.28678 | 0.47923 | 0.59912 |
| 0.784 | 0.35146 | 0.34004 | 0.2735  | 0.784 | 0.28996 | 0.40902 | 0.33326 | 0.41176 | 0.784 | 0.26449 | 0.29094 | 0.4796  | 0.60075 |
| 0.788 | 0.3588  | 0.34315 | 0.27668 | 0.788 | 0.29187 | 0.40963 | 0.33521 | 0.41397 | 0.788 | 0.26849 | 0.2951  | 0.47996 | 0.60239 |
| 0.792 | 0.3664  | 0.34625 | 0.27965 | 0.792 | 0.29377 | 0.41025 | 0.33673 | 0.41586 | 0.792 | 0.27288 | 0.29898 | 0.48104 | 0.60403 |
| 0.796 | 0.374   | 0.34967 | 0.28243 | 0.796 | 0.29525 | 0.41086 | 0.33803 | 0.41807 | 0.796 | 0.27767 | 0.30314 | 0.48212 | 0.60607 |
| 0.8   | 0.3811  | 0.35309 | 0.2852  | 0.8   | 0.29652 | 0.41086 | 0.33955 | 0.42059 | 0.8   | 0.28206 | 0.30757 | 0.48357 | 0.60852 |
| 0.804 | 0.38794 | 0.35588 | 0.28758 | 0.804 | 0.29737 | 0.41055 | 0.34042 | 0.42248 | 0.804 | 0.28606 | 0.31118 | 0.48501 | 0.61057 |
| 0.808 | 0.39452 | 0.3593  | 0.28996 | 0.808 | 0.29822 | 0.41055 | 0.34129 | 0.42437 | 0.808 | 0.29085 | 0.31506 | 0.48646 | 0.61302 |
| 0.812 | 0.40086 | 0.3624  | 0.29195 | 0.812 | 0.29864 | 0.40994 | 0.34216 | 0.42627 | 0.812 | 0.29484 | 0.31894 | 0.48826 | 0.61548 |
| 0.816 | 0.40668 | 0.36551 | 0.29353 | 0.816 | 0.29885 | 0.40902 | 0.34259 | 0.42816 | 0.816 | 0.29883 | 0.32254 | 0.49007 | 0.61793 |
| 0.82  | 0.412   | 0.3683  | 0.29512 | 0.82  | 0.29885 | 0.4081  | 0.34281 | 0.42942 | 0.82  | 0.30283 | 0.32587 | 0.49187 | 0.61998 |
| 0.824 | 0.41631 | 0.37079 | 0.29611 | 0.824 | 0.29822 | 0.40687 | 0.34259 | 0.43068 | 0.824 | 0.30602 | 0.32864 | 0.49332 | 0.62161 |
| 0.828 | 0.42138 | 0.37358 | 0.2971  | 0.828 | 0.29822 | 0.40564 | 0.34259 | 0.43194 | 0.828 | 0.31001 | 0.33141 | 0.49549 | 0.62448 |
| 0.832 | 0.42518 | 0.37638 | 0.29829 | 0.832 | 0.29758 | 0.40472 | 0.34259 | 0.43289 | 0.832 | 0.31361 | 0.33391 | 0.49729 | 0.62693 |
| 0.836 | 0.42847 | 0.37855 | 0.29869 | 0.836 | 0.29716 | 0.40288 | 0.34216 | 0.43352 | 0.836 | 0.3168  | 0.33585 | 0.4991  | 0.62898 |
| 0.84  | 0.43202 | 0.38104 | 0.29968 | 0.84  | 0.29673 | 0.40165 | 0.34194 | 0.43415 | 0.84  | 0.32    | 0.33806 | 0.5009  | 0.63143 |
| 0.844 | 0.43531 | 0.38352 | 0.30028 | 0.844 | 0.29631 | 0.40012 | 0.34172 | 0.43446 | 0.844 | 0.32319 | 0.33973 | 0.50307 | 0.63389 |
| 0.848 | 0.43835 | 0.3857  | 0.30087 | 0.848 | 0.29589 | 0.39889 | 0.34151 | 0.43478 | 0.848 | 0.32639 | 0.34084 | 0.50451 | 0.63552 |
| 0.852 | 0.44114 | 0.38787 | 0.30167 | 0.852 | 0.29568 | 0.39735 | 0.34129 | 0.43478 | 0.852 | 0.32878 | 0.34222 | 0.50596 | 0.63716 |
| 0.856 | 0.44418 | 0.39035 | 0.30226 | 0.856 | 0.29525 | 0.39613 | 0.34085 | 0.43478 | 0.856 | 0.33118 | 0.34333 | 0.50776 | 0.63839 |
| 0.86  | 0.44722 | 0.39284 | 0.30345 | 0.86  | 0.29525 | 0.3949  | 0.34085 | 0.43509 | 0.86  | 0.33397 | 0.34416 | 0.50885 | 0.64043 |
| 0.864 | 0.45051 | 0.39563 | 0.30444 | 0.864 | 0.29546 | 0.39367 | 0.34107 | 0.43509 | 0.864 | 0.33597 | 0.34499 | 0.51065 | 0.64166 |
| 0.868 | 0.45355 | 0.39812 | 0.30563 | 0.868 | 0.29589 | 0.39275 | 0.34107 | 0.43509 | 0.868 | 0.33836 | 0.34555 | 0.51138 | 0.64248 |
| 0.872 | 0.45735 | 0.40122 | 0.30722 | 0.872 | 0.29652 | 0.39213 | 0.34151 | 0.43541 | 0.872 | 0.34036 | 0.34638 | 0.51282 | 0.6433  |
| 0.876 | 0.46191 | 0.40433 | 0.3094  | 0.876 | 0.29779 | 0.39183 | 0.34259 | 0.43635 | 0.876 | 0.34316 | 0.34749 | 0.5139  | 0.64493 |
| 0.88  | 0.46622 | 0.40744 | 0.31138 | 0.88  | 0.29885 | 0.39183 | 0.34324 | 0.43667 | 0.88  | 0.34515 | 0.34832 | 0.51499 | 0.64534 |
| 0.884 | 0.47078 | 0.41116 | 0.31396 | 0.884 | 0.30033 | 0.39152 | 0.34411 | 0.43761 | 0.884 | 0.34715 | 0.34943 | 0.51571 | 0.64575 |
| 0.888 | 0.47559 | 0.41489 | 0.31654 | 0.888 | 0.30203 | 0.39183 | 0.34563 | 0.43856 | 0.888 | 0.34954 | 0.35026 | 0.51679 | 0.64575 |
| 0.892 | 0.48142 | 0.41893 | 0.31952 | 0.892 | 0.30414 | 0.39275 | 0.34715 | 0.44014 | 0.892 | 0.35194 | 0.35165 | 0.51752 | 0.64657 |
| 0.896 | 0.48724 | 0.42327 | 0.32289 | 0.896 | 0.30647 | 0.39367 | 0.34888 | 0.44171 | 0.896 | 0.35434 | 0.35303 | 0.5186  | 0.64698 |
| 0.9   | 0.49332 | 0.42793 | 0.32646 | 0.9   | 0.30901 | 0.39459 | 0.35084 | 0.44297 | 0.9   | 0.35673 | 0.35442 | 0.51968 | 0.64657 |
| 0.904 | 0.49991 | 0.43259 | 0.33042 | 0.904 | 0.31197 | 0.39613 | 0.35344 | 0.44518 | 0.904 | 0.35953 | 0.35608 | 0.52077 | 0.64657 |
| 0.908 | 0.50675 | 0.43818 | 0.33479 | 0.908 | 0.31515 | 0.39797 | 0.35604 | 0.44739 | 0.908 | 0.36192 | 0.3583  | 0.52185 | 0.64657 |
| 0.912 | 0.51384 | 0.44346 | 0.33895 | 0.912 | 0.31874 | 0.40012 | 0.35908 | 0.44991 | 0.912 | 0.36472 | 0.36024 | 0.52329 | 0.64616 |
| 0.916 | 0.52119 | 0.44905 | 0.34371 | 0.916 | 0.32255 | 0.40227 | 0.3619  | 0.45275 | 0.916 | 0.36791 | 0.36273 | 0.52438 | 0.64575 |
| 0.92  | 0.52879 | 0.45526 | 0.34847 | 0.92  | 0.32658 | 0.40472 | 0.36537 | 0.45558 | 0.92  | 0.37071 | 0.36523 | 0.52582 | 0.64493 |
| 0.924 | 0.53665 | 0.46116 | 0.35363 | 0.924 | 0.33081 | 0.40779 | 0.36906 | 0.45905 | 0.924 | 0.3739  | 0.368   | 0.52763 | 0.64411 |
| 0.928 | 0.5445  | 0.46769 | 0.35879 | 0.928 | 0.33504 | 0.41117 | 0.37297 | 0.46283 | 0.928 | 0.3771  | 0.37105 | 0.52943 | 0.6433  |
| 0.932 | 0.55235 | 0.4739  | 0.36394 | 0.932 | 0.33948 | 0.41455 | 0.37665 | 0.4663  | 0.932 | 0.38029 | 0.37382 | 0.53124 | 0.64166 |
| 0.936 | 0.56046 | 0.48042 | 0.3695  | 0.936 | 0.34435 | 0.41823 | 0.38121 | 0.4704  | 0.936 | 0.38349 | 0.37743 | 0.53377 | 0.64084 |
| 0.94  | 0.56907 | 0.48694 | 0.37545 | 0.94  | 0.34922 | 0.42222 | 0.38577 | 0.47481 | 0.94  | 0.38708 | 0.38103 | 0.53629 | 0.63961 |
| 0.944 | 0.57718 | 0.49346 | 0.3812  | 0.944 | 0.3543  | 0.42621 | 0.39032 | 0.47923 | 0.944 | 0.39107 | 0.38463 | 0.53846 | 0.63839 |
| 0.948 | 0.58529 | 0.49998 | 0.38695 | 0.948 | 0.35959 | 0.43082 | 0.39488 | 0.48395 | 0.948 | 0.39467 | 0.38824 | 0.54099 | 0.63675 |
| 0.952 | 0.59339 | 0.50651 | 0.3931  | 0.952 | 0.36488 | 0.43511 | 0.40009 | 0.48868 | 0.952 | 0.39866 | 0.39239 | 0.54388 | 0.63511 |
| 0.956 | 0.6015  | 0.51303 | 0.39905 | 0.956 | 0.37038 | 0.43972 | 0.40508 | 0.49373 | 0.956 | 0.40265 | 0.39683 | 0.54713 | 0.63389 |
| 0.96  | 0.61011 | 0.51955 | 0.4052  | 0.96  | 0.37589 | 0.44463 | 0.41028 | 0.49909 | 0.96  | 0.40664 | 0.40126 | 0.55038 | 0.63225 |
| 0.964 | 0.61797 | 0.52545 | 0.41134 | 0.964 | 0.38139 | 0.44954 | 0.41527 | 0.50444 | 0.964 | 0.41064 | 0.4057  | 0.55327 | 0.63102 |
| 0.968 | 0.62607 | 0.53135 | 0.41769 | 0.968 | 0.3871  | 0.45476 | 0.4207  | 0.5098  | 0.968 | 0.41503 | 0.41041 | 0.55688 | 0.6298  |
| 0.972 | 0.63418 | 0.53725 | 0.42404 | 0.972 | 0.39282 | 0.45998 | 0.42612 | 0.51548 | 0.972 | 0.41942 | 0.4154  | 0.56085 | 0.62857 |
| 0.976 | 0.64153 | 0.54284 | 0.43019 | 0.976 | 0.39853 | 0.4652  | 0.43155 | 0.52147 | 0.976 | 0.42381 | 0.42011 | 0.56446 | 0.62734 |
| 0.98  | 0.64913 | 0.54812 | 0.43653 | 0.98  | 0.40446 | 0.47011 | 0.43697 | 0.52714 | 0.98  | 0.42821 | 0.42538 | 0.56844 | 0.62652 |
| 0.984 | 0.65622 | 0.5534  | 0.44248 | 0.984 | 0.40975 | 0.47564 | 0.44218 | 0.53313 | 0.984 | 0.433   | 0.43037 | 0.57205 | 0.62571 |
| 0.988 | 0.66357 | 0.55806 | 0.44863 | 0.988 | 0.41525 | 0.48055 | 0.44739 | 0.53944 | 0.988 | 0.43699 | 0.43536 | 0.57602 | 0.6253  |
| 0.992 | 0.67066 | 0.56241 | 0.45458 | 0.992 | 0.42075 | 0.48546 | 0.45238 | 0.54543 | 0.992 | 0.44138 | 0.44063 | 0.57999 | 0.62489 |
| 0.996 | 0.67674 | 0.56645 | 0.45994 | 0.996 | 0.42562 | 0.49007 | 0.45693 | 0.5511  | 0.996 | 0.44538 | 0.44561 | 0.58397 | 0.62407 |
| 1     | 0.68333 | 0.57017 | 0.46549 | 1     | 0.4307  | 0.49467 | 0.46149 | 0.5574  | 1     | 0.44977 | 0.4506  | 0.58794 | 0.62366 |
| 1.004 | 0.68941 | 0.5739  | 0.47104 | 1.004 | 0.43536 | 0.49928 | 0.46604 | 0.56339 | 1.004 | 0.45416 | 0.45559 | 0.59191 | 0.62325 |
| 1.008 | 0.69523 | 0.57701 | 0.4762  | 1.008 | 0.4398  | 0.50327 | 0.47017 | 0.56907 | 1.008 | 0.45815 | 0.46058 | 0.59588 | 0.62325 |
| 1.012 | 0.7003  | 0.5798  | 0.48076 | 1.012 | 0.44382 | 0.50726 | 0.47407 | 0.57474 | 1.012 | 0.46215 | 0.4653  | 0.59986 | 0.62325 |
| 1.016 | 0.70511 | 0.58229 | 0.48592 | 1.016 | 0.44763 | 0.51125 | 0.47776 | 0.58042 | 1.016 | 0.46574 | 0.46945 | 0.60347 | 0.62284 |
| 1.02  | 0.70967 | 0.58477 | 0.49008 | 1.02  | 0.45144 | 0.51494 | 0.48145 | 0.58609 | 1.02  | 0.46973 | 0.47417 | 0.60744 | 0.62325 |
| 1.024 | 0.71373 | 0.58694 | 0.49425 | 1.024 | 0.45483 | 0.51831 | 0.48492 | 0.59177 | 1.024 | 0.47333 | 0.4786  | 0.61105 | 0.62325 |
| 1.028 | 0.71702 | 0.5885  | 0.49782 | 1.028 | 0.45779 | 0.52138 | 0.48774 | 0.59649 | 1.028 | 0.47692 | 0.4822  | 0.61394 | 0.62284 |
| 1.032 | 0.72006 | 0.59036 | 0.50159 | 1.032 | 0.46075 | 0.52476 | 0.49078 | 0.60185 | 1.032 | 0.48011 | 0.48608 | 0.61755 | 0.62284 |
| 1.036 | 0.7231  | 0.59191 | 0.50496 | 1.036 | 0.46372 | 0.52752 | 0.4936  | 0.6069  | 1.036 | 0.48371 | 0.48997 | 0.6208  | 0.62284 |
| 1.04  | 0.72513 | 0.59347 | 0.50813 | 1.04  | 0.46647 | 0.53059 | 0.49642 | 0.61163 | 1.04  | 0.4869  | 0.49329 | 0.62333 | 0.62284 |
| 1.044 | 0.7269  | 0.59471 | 0.51111 | 1.044 | 0.46901 | 0.53336 | 0.49902 | 0.61667 | 1.044 | 0.4901  | 0.49662 | 0.62622 | 0.62243 |
| 1.048 | 0.72817 | 0.59626 | 0.51388 | 1.048 | 0.47133 | 0.53612 | 0.50141 | 0.62108 | 1.048 | 0.49329 | 0.49994 | 0.62875 | 0.62243 |
| 1.052 | 0.72944 | 0.5975  | 0.51666 | 1.052 | 0.47387 | 0.53888 | 0.50423 | 0.62581 | 1.052 | 0.49649 | 0.50299 | 0.63127 | 0.62243 |
| 1.056 | 0.73045 | 0.59906 | 0.51944 | 1.056 | 0.47641 | 0.54164 | 0.50705 | 0.63023 | 1.056 | 0.49968 | 0.50604 | 0.6338  | 0.62243 |
| 1.06  | 0.7307  | 0.6003  | 0.52182 | 1.06  | 0.47874 | 0.5441  | 0.50966 | 0.63432 | 1.06  | 0.50287 | 0.50854 | 0.63561 | 0.62202 |
| 1.064 | 0.73146 | 0.60185 | 0.52459 | 1.064 | 0.48149 | 0.54686 | 0.51248 | 0.63874 | 1.064 | 0.50607 | 0.51159 | 0.63741 | 0.62202 |
| 1.068 | 0.73197 | 0.60371 | 0.52737 | 1.068 | 0.48446 | 0.54993 | 0.51551 | 0.64347 | 1.068 | 0.50966 | 0.51436 | 0.63922 | 0.62202 |
| 1.072 | 0.73248 | 0.60527 | 0.52995 | 1.072 | 0.48721 | 0.553   | 0.51855 | 0.64756 | 1.072 | 0.51286 | 0.51741 | 0.64103 | 0.62202 |
| 1.076 | 0.73273 | 0.60713 | 0.53273 | 1.076 | 0.49017 | 0.55577 | 0.52181 | 0.65229 | 1.076 | 0.51645 | 0.52018 | 0.64247 | 0.62202 |
| 1.08  | 0.73324 | 0.60899 | 0.5357  | 1.0   |         |         |         |         |       |         |         |         |         |



|       |         |         |         |       |         |         |         |         |       |         |         |         |         |
|-------|---------|---------|---------|-------|---------|---------|---------|---------|-------|---------|---------|---------|---------|
| 1.192 | 0.8143  | 0.7472  | 0.70309 | 1.192 | 0.67048 | 0.72063 | 0.69863 | 0.83103 | 1.192 | 0.70292 | 0.67818 | 0.74178 | 0.71406 |
| 1.196 | 0.81912 | 0.75465 | 0.71222 | 1.196 | 0.68001 | 0.72892 | 0.70731 | 0.83765 | 1.196 | 0.71211 | 0.68677 | 0.74828 | 0.72102 |
| 1.2   | 0.82368 | 0.7621  | 0.72134 | 1.2   | 0.68974 | 0.7369  | 0.71621 | 0.84459 | 1.2   | 0.72129 | 0.69537 | 0.75479 | 0.72838 |
| 1.204 | 0.82849 | 0.76987 | 0.73027 | 1.204 | 0.69927 | 0.74519 | 0.7251  | 0.85121 | 1.204 | 0.73047 | 0.70396 | 0.76129 | 0.73574 |
| 1.208 | 0.8333  | 0.77732 | 0.73959 | 1.208 | 0.70921 | 0.75409 | 0.73422 | 0.85783 | 1.208 | 0.73966 | 0.71311 | 0.76851 | 0.74311 |
| 1.212 | 0.83862 | 0.7854  | 0.74911 | 1.212 | 0.71979 | 0.76238 | 0.74376 | 0.86413 | 1.212 | 0.74964 | 0.72253 | 0.77573 | 0.75129 |
| 1.216 | 0.84394 | 0.79347 | 0.75902 | 1.216 | 0.73016 | 0.77128 | 0.75331 | 0.87075 | 1.216 | 0.75922 | 0.73251 | 0.78295 | 0.75988 |
| 1.22  | 0.84901 | 0.80093 | 0.76835 | 1.22  | 0.74032 | 0.77988 | 0.76286 | 0.87674 | 1.22  | 0.76881 | 0.74193 | 0.79018 | 0.76806 |
| 1.224 | 0.85484 | 0.80931 | 0.77846 | 1.224 | 0.75112 | 0.78909 | 0.77305 | 0.88273 | 1.224 | 0.77919 | 0.75219 | 0.79812 | 0.77706 |
| 1.228 | 0.86066 | 0.81739 | 0.78838 | 1.228 | 0.76212 | 0.7983  | 0.78325 | 0.88904 | 1.228 | 0.78917 | 0.76272 | 0.80607 | 0.78606 |
| 1.232 | 0.86649 | 0.82577 | 0.79849 | 1.232 | 0.77313 | 0.80782 | 0.79323 | 0.89534 | 1.232 | 0.79955 | 0.77326 | 0.81473 | 0.79547 |
| 1.236 | 0.87232 | 0.83385 | 0.80821 | 1.236 | 0.78413 | 0.81703 | 0.80321 | 0.9007  | 1.236 | 0.80954 | 0.78379 | 0.82268 | 0.80447 |
| 1.24  | 0.87865 | 0.84254 | 0.81872 | 1.24  | 0.79514 | 0.82685 | 0.81363 | 0.90669 | 1.24  | 0.81952 | 0.79515 | 0.83135 | 0.81388 |
| 1.244 | 0.88524 | 0.85124 | 0.82943 | 1.244 | 0.80699 | 0.83698 | 0.82447 | 0.91268 | 1.244 | 0.8303  | 0.80652 | 0.84038 | 0.82451 |
| 1.248 | 0.89208 | 0.86055 | 0.84034 | 1.248 | 0.81926 | 0.84711 | 0.83554 | 0.91867 | 1.248 | 0.84108 | 0.81844 | 0.85013 | 0.83556 |
| 1.252 | 0.89841 | 0.86987 | 0.85085 | 1.252 | 0.83111 | 0.85724 | 0.84617 | 0.92434 | 1.252 | 0.85186 | 0.8298  | 0.85952 | 0.84578 |
| 1.256 | 0.90576 | 0.87919 | 0.86236 | 1.256 | 0.8436  | 0.86799 | 0.85767 | 0.93065 | 1.256 | 0.86304 | 0.842   | 0.86999 | 0.85683 |
| 1.26  | 0.91311 | 0.88882 | 0.87346 | 1.26  | 0.85651 | 0.87904 | 0.86939 | 0.93664 | 1.26  | 0.87462 | 0.85475 | 0.8801  | 0.86869 |
| 1.264 | 0.92045 | 0.89907 | 0.88516 | 1.264 | 0.86963 | 0.88979 | 0.88132 | 0.94263 | 1.264 | 0.8862  | 0.8675  | 0.89094 | 0.88014 |
| 1.268 | 0.92805 | 0.90931 | 0.89667 | 1.268 | 0.88254 | 0.90115 | 0.89325 | 0.9483  | 1.268 | 0.89778 | 0.88053 | 0.90141 | 0.89201 |
| 1.272 | 0.93616 | 0.91956 | 0.90877 | 1.272 | 0.89609 | 0.9122  | 0.90562 | 0.95398 | 1.272 | 0.90976 | 0.89439 | 0.9126  | 0.90428 |
| 1.276 | 0.94427 | 0.93012 | 0.92106 | 1.276 | 0.91005 | 0.92417 | 0.91864 | 0.96028 | 1.276 | 0.92214 | 0.90853 | 0.92416 | 0.91655 |
| 1.28  | 0.95313 | 0.9413  | 0.93356 | 1.28  | 0.92402 | 0.93614 | 0.93166 | 0.96658 | 1.28  | 0.93491 | 0.92294 | 0.93608 | 0.93046 |
| 1.284 | 0.96149 | 0.95217 | 0.94605 | 1.284 | 0.9382  | 0.94781 | 0.94446 | 0.97226 | 1.284 | 0.94689 | 0.93708 | 0.94763 | 0.94273 |
| 1.288 | 0.97137 | 0.96428 | 0.95954 | 1.288 | 0.95365 | 0.96101 | 0.95834 | 0.97951 | 1.288 | 0.96007 | 0.95315 | 0.96064 | 0.95705 |
| 1.292 | 0.98049 | 0.97578 | 0.97243 | 1.292 | 0.96889 | 0.9736  | 0.97223 | 0.98613 | 1.292 | 0.97325 | 0.9684  | 0.97364 | 0.97137 |
| 1.296 | 0.99037 | 0.98789 | 0.98631 | 1.296 | 0.98392 | 0.98649 | 0.9859  | 0.99306 | 1.296 | 0.98642 | 0.9842  | 0.98664 | 0.98527 |
| 1.3   | 1       | 1       | 1       | 1.3   | 1       | 1       | 1       | 1       | 1.3   | 1       | 1       | 1       | 1       |

Ethanol-PBS (Spring)

Ethanol-PBS (Summer)

Ethanol-PBS (Autumn)

|       |          |          |          |       |          |          |          |          |       |          |          |          |          |
|-------|----------|----------|----------|-------|----------|----------|----------|----------|-------|----------|----------|----------|----------|
| 0.004 | 0.10601  | 0.12211  | 0.05926  | 0.004 | 0.07563  | 0.05468  | 0.05885  | 0.01102  | 0.004 | 0.04043  | 0.03146  | 0.0344   | 0.02708  |
| 0.008 | 0.09781  | 0.11253  | 0.05342  | 0.008 | 0.0687   | 0.04977  | 0.05368  | 0.00912  | 0.008 | 0.03571  | 0.02729  | 0.02995  | 0.02391  |
| 0.012 | 0.09126  | 0.10348  | 0.04836  | 0.012 | 0.06225  | 0.04503  | 0.04851  | 0.00738  | 0.012 | 0.03164  | 0.02365  | 0.02572  | 0.02091  |
| 0.016 | 0.0847   | 0.09604  | 0.04369  | 0.016 | 0.05606  | 0.04058  | 0.04414  | 0.00568  | 0.016 | 0.02775  | 0.0203   | 0.02226  | 0.01821  |
| 0.02  | 0.07923  | 0.08859  | 0.03941  | 0.02  | 0.05075  | 0.03657  | 0.03976  | 0.00432  | 0.02  | 0.02444  | 0.01721  | 0.01907  | 0.01574  |
| 0.024 | 0.07377  | 0.08183  | 0.03512  | 0.024 | 0.0457   | 0.03255  | 0.03539  | 0.0032   | 0.024 | 0.02117  | 0.01446  | 0.01643  | 0.01344  |
| 0.028 | 0.06885  | 0.07576  | 0.03162  | 0.028 | 0.04139  | 0.02923  | 0.03141  | 0.00204  | 0.028 | 0.01843  | 0.01184  | 0.01385  | 0.01137  |
| 0.032 | 0.06393  | 0.06949  | 0.02772  | 0.032 | 0.03683  | 0.02568  | 0.02823  | 0.00121  | 0.032 | 0.01573  | 0.0097   | 0.01138  | 0.0094   |
| 0.036 | 0.05902  | 0.06363  | 0.02422  | 0.036 | 0.03276  | 0.02243  | 0.02425  | 4.37E-04 | 0.036 | 0.01295  | 0.00725  | 0.0094   | 0.0076   |
| 0.04  | 0.05464  | 0.05863  | 0.02071  | 0.04  | 0.0287   | 0.01951  | 0.02107  | 9.71E-05 | 0.04  | 0.01074  | 0.00541  | 0.00742  | 0.00592  |
| 0.044 | 0.05027  | 0.05347  | 0.01787  | 0.044 | 0.02498  | 0.01686  | 0.01789  | 0        | 0.044 | 0.00857  | 0.00403  | 0.00555  | 0.00449  |
| 0.048 | 0.04645  | 0.0489   | 0.01507  | 0.048 | 0.02141  | 0.01437  | 0.01511  | 9.71E-05 | 0.048 | 0.00672  | 0.00257  | 0.0039   | 0.00314  |
| 0.052 | 0.04208  | 0.04411  | 0.01223  | 0.052 | 0.01789  | 0.01191  | 0.01233  | 2.43E-04 | 0.052 | 0.00482  | 0.00154  | 0.00275  | 0.00205  |
| 0.056 | 0.03825  | 0.03943  | 0.01016  | 0.056 | 0.01477  | 0.00969  | 0.00994  | 0.00102  | 0.056 | 0.00314  | 6.44E-04 | 0.00159  | 0.00115  |
| 0.06  | 0.03497  | 0.03538  | 0.0081   | 0.06  | 0.01249  | 0.00786  | 0.00795  | 0.00204  | 0.06  | 0.0019   | 2.15E-04 | 9.34E-04 | 4.77E-04 |
| 0.064 | 0.03115  | 0.0316   | 0.00615  | 0.064 | 0.00966  | 0.00614  | 0.00596  | 0.00345  | 0.064 | 0.00102  | 0        | 3.30E-04 | 1.68E-04 |
| 0.068 | 0.02787  | 0.02729  | 0.00432  | 0.068 | 0.00739  | 0.00468  | 0.00398  | 0.00548  | 0.068 | 3.54E-04 | 4.72E-04 | 0        | 0        |
| 0.072 | 0.02459  | 0.024    | 0.00276  | 0.072 | 0.00515  | 0.00325  | 0.00278  | 0.00781  | 0.072 | 0        | 0.00112  | 1.10E-04 | 3.93E-04 |
| 0.076 | 0.02186  | 0.02059  | 0.00199  | 0.076 | 0.00357  | 0.00212  | 0.00159  | 0.01082  | 0.076 | 2.65E-04 | 0.00215  | 4.95E-04 | 0.00115  |
| 0.08  | 0.01858  | 0.0174   | 8.18E-04 | 0.08  | 0.00193  | 0.00149  | 7.95E-04 | 0.01403  | 0.08  | 5.74E-04 | 0.00382  | 0.00159  | 0.00236  |
| 0.084 | 0.01585  | 0.01453  | 2.34E-04 | 0.084 | 8.92E-04 | 8.30E-04 | 3.98E-04 | 0.01815  | 0.084 | 0.00141  | 0.00588  | 0.00302  | 0.0041   |
| 0.088 | 0.01311  | 0.01149  | 0        | 0.088 | 1.98E-04 | 2.32E-04 | 0        | 0.02266  | 0.088 | 0.00247  | 0.0082   | 0.00478  | 0.00631  |
| 0.092 | 0.01093  | 0.0092   | 3.89E-05 | 0.092 | 0        | 0        | 3.98E-04 | 0.02795  | 0.092 | 0.00424  | 0.01124  | 0.00736  | 0.00923  |
| 0.096 | 0.0082   | 0.0074   | 3.12E-04 | 0.096 | 1.49E-04 | 1.66E-04 | 7.95E-04 | 0.03383  | 0.096 | 0.0065   | 0.01519  | 0.01006  | 0.01291  |
| 0.1   | 0.00601  | 0.00537  | 7.01E-04 | 0.1   | 4.46E-04 | 3.32E-04 | 0.00119  | 0.04009  | 0.1   | 0.00897  | 0.01948  | 0.01352  | 0.01723  |
| 0.104 | 0.00437  | 0.00404  | 0.00156  | 0.104 | 0.00124  | 5.97E-04 | 0.00278  | 0.04736  | 0.104 | 0.01211  | 0.02437  | 0.01797  | 0.02256  |
| 0.108 | 0.00273  | 0.0025   | 0.00245  | 0.108 | 0.00228  | 9.95E-04 | 0.00398  | 0.05508  | 0.108 | 0.01586  | 0.03008  | 0.0227   | 0.02876  |
| 0.112 | 0.00164  | 0.00112  | 0.00362  | 0.112 | 0.00387  | 0.00189  | 0.00557  | 0.06333  | 0.112 | 0.01993  | 0.036    | 0.02819  | 0.03603  |
| 0.116 | 5.46E-04 | 5.85E-04 | 0.00487  | 0.116 | 0.00565  | 0.00265  | 0.00755  | 0.07211  | 0.116 | 0.02461  | 0.04257  | 0.03451  | 0.04439  |
| 0.12  | 0        | 1.60E-04 | 0.0065   | 0.12  | 0.00793  | 0.00348  | 0.00994  | 0.08134  | 0.12  | 0.02978  | 0.04952  | 0.04144  | 0.05413  |
| 0.124 | 0        | 0        | 0.0081   | 0.124 | 0.0108   | 0.00461  | 0.01233  | 0.09099  | 0.124 | 0.03544  | 0.05733  | 0.04935  | 0.06519  |
| 0.128 | 5.46E-04 | 3.72E-04 | 0.01016  | 0.128 | 0.01383  | 0.00594  | 0.01551  | 0.10084  | 0.128 | 0.04158  | 0.06518  | 0.05776  | 0.07787  |
| 0.132 | 0.00219  | 0.00101  | 0.01254  | 0.132 | 0.0169   | 0.00717  | 0.01869  | 0.11089  | 0.132 | 0.04812  | 0.0742   | 0.06732  | 0.09218  |
| 0.136 | 0.00437  | 0.00213  | 0.01491  | 0.136 | 0.02121  | 0.00889  | 0.02266  | 0.12123  | 0.136 | 0.05524  | 0.08338  | 0.0776   | 0.10846  |
| 0.14  | 0.0071   | 0.00356  | 0.01783  | 0.14  | 0.02587  | 0.01042  | 0.02704  | 0.13181  | 0.14  | 0.06266  | 0.09342  | 0.08931  | 0.12642  |
| 0.144 | 0.01148  | 0.00617  | 0.02149  | 0.144 | 0.03108  | 0.01224  | 0.03141  | 0.14253  | 0.144 | 0.07062  | 0.10424  | 0.10173  | 0.14634  |
| 0.148 | 0.01694  | 0.00899  | 0.02539  | 0.148 | 0.03688  | 0.01427  | 0.03698  | 0.15326  | 0.148 | 0.07897  | 0.11539  | 0.11514  | 0.16795  |
| 0.152 | 0.02404  | 0.01272  | 0.03006  | 0.152 | 0.04426  | 0.01679  | 0.04254  | 0.16427  | 0.152 | 0.08798  | 0.12745  | 0.1297   | 0.19124  |
| 0.156 | 0.03333  | 0.01761  | 0.03512  | 0.156 | 0.05229  | 0.01958  | 0.0497   | 0.17573  | 0.156 | 0.09757  | 0.14037  | 0.14531  | 0.21594  |
| 0.16  | 0.04426  | 0.02405  | 0.04135  | 0.16  | 0.06225  | 0.02289  | 0.05726  | 0.18762  | 0.16  | 0.10778  | 0.15457  | 0.16201  | 0.24176  |
| 0.164 | 0.05738  | 0.03027  | 0.04836  | 0.164 | 0.07316  | 0.02648  | 0.06561  | 0.19946  | 0.164 | 0.11843  | 0.16946  | 0.17911  | 0.26785  |
| 0.168 | 0.07268  | 0.03836  | 0.05615  | 0.168 | 0.08604  | 0.03066  | 0.07475  | 0.21203  | 0.168 | 0.12988  | 0.18508  | 0.19719  | 0.29423  |
| 0.172 | 0.09016  | 0.04794  | 0.0651   | 0.172 | 0.09992  | 0.0356   | 0.08469  | 0.22518  | 0.172 | 0.14194  | 0.20182  | 0.2156   | 0.32005  |
| 0.176 | 0.11093  | 0.05853  | 0.07484  | 0.176 | 0.11578  | 0.04085  | 0.09583  | 0.23833  | 0.176 | 0.15454  | 0.21898  | 0.23395  | 0.34503  |
| 0.18  | 0.13333  | 0.06949  | 0.08535  | 0.18  | 0.13313  | 0.04675  | 0.10736  | 0.25187  | 0.18  | 0.16744  | 0.23658  | 0.25181  | 0.36832  |
| 0.184 | 0.15738  | 0.08125  | 0.09664  | 0.184 | 0.15147  | 0.05335  | 0.11889  | 0.26531  | 0.184 | 0.1807   | 0.25332  | 0.26896  | 0.38993  |
| 0.188 | 0.18306  | 0.09444  | 0.10832  | 0.188 | 0.1708   | 0.05999  | 0.13121  | 0.27856  | 0.188 | 0.19351  | 0.27005  | 0.2849   | 0.40929  |
| 0.192 | 0.20929  | 0.10561  | 0.11962  | 0.192 | 0.19013  | 0.06663  | 0.14314  | 0.29084  | 0.192 | 0.20633  | 0.28507  | 0.29875  | 0.42585  |
| 0.196 | 0.23607  | 0.11785  | 0.13052  | 0.196 | 0.20847  | 0.07359  | 0.15467  | 0.30224  | 0.196 | 0.21826  | 0.29837  | 0.31029  | 0.4396   |
| 0.2   | 0.2612   | 0.12849  | 0.14064  | 0.2   | 0.22581  | 0.08023  | 0.16541  | 0.31248  | 0.2   | 0.22975  | 0.30996  | 0.31908  | 0.45026  |
| 0.204 | 0.28579  | 0.13807  | 0.1496   | 0.204 | 0.24118  | 0.0862   | 0.17535  | 0.32102  | 0.204 | 0.23947  | 0.31854  | 0.32568  | 0.45784  |
| 0.208 | 0.30765  | 0.14605  | 0.157    | 0.208 | 0.25357  | 0.09184  | 0.1833   | 0.32806  | 0.208 | 0.24831  | 0.32369  | 0.32952  | 0.46233  |
| 0.212 | 0.32568  | 0.15084  | 0.16284  | 0.212 | 0.26249  | 0.09616  | 0.18966  | 0.33272  | 0.212 | 0.25494  | 0.32627  | 0.33062  | 0.46373  |
| 0.216 | 0.33934  | 0.1535   | 0.16595  | 0.216 | 0.26745  | 0.09948  | 0.19404  | 0.33563  | 0.216 | 0.2598   | 0.32498  | 0.32897  | 0.46148  |
| 0.22  | 0.34918  | 0.15403  | 0.16751  | 0.22  | 0.26943  | 0.1018   | 0.19642  | 0.3366   | 0.22  | 0.26289  | 0.32112  | 0.32623  | 0.45643  |
| 0.224 | 0.3541   | 0.1519   | 0.16634  | 0.224 | 0.26646  | 0.10279  | 0.19682  | 0.33563  | 0.224 | 0.26422  | 0.31468  | 0.32128  | 0.44801  |
| 0.228 | 0.35301  | 0.14765  | 0.16284  | 0.228 | 0.25952  | 0.10213  | 0.19523  | 0.33262  | 0.228 | 0.26289  | 0.30567  | 0.31413  | 0.43763  |
| 0.232 | 0.34809  | 0.14073  | 0.15778  | 0.232 | 0.2496   | 0.10047  | 0.19165  | 0.32806  | 0.232 | 0.2598   | 0.29408  | 0.30699  | 0.42472  |
| 0.236 | 0.3377   | 0.13168  | 0.15116  | 0.236 | 0.23622  | 0.09782  | 0.18728  | 0.32204  | 0.236 | 0.25538  | 0.28164  | 0.29875  | 0.41041  |
| 0.24  | 0.32404  | 0.12157  | 0.14259  | 0.24  | 0.22036  | 0.09384  | 0.18091  | 0.31501  | 0.24  | 0.24919  | 0.26748  | 0.28907  | 0.39413  |
| 0.244 | 0.3071   | 0.10987  | 0.13325  | 0.244 | 0.20301  | 0.08985  | 0.17376  | 0.3071   | 0.244 | 0.24212  | 0.25289  | 0.27968  | 0.3773   |
| 0.248 | 0.28798  | 0.0987   | 0.12312  | 0.248 | 0.18418  | 0.08454  | 0.16541  | 0.29884  | 0.248 | 0.23328  | 0.23787  | 0.26989  | 0.36046  |
| 0.252 | 0.26831  | 0.0871   | 0.11261  | 0.252 | 0.16584  | 0.07957  | 0.15746  | 0.29055  | 0.252 | 0.22489  | 0.22285  | 0.26     | 0.3439   |
| 0.256 | 0.24754  | 0.07566  | 0.10248  | 0.256 | 0.14701  | 0.07426  | 0.14871  | 0.28196  | 0.256 | 0.21605  | 0.20869  | 0.25071  | 0.32763  |
| 0.26  | 0.22732  | 0.06475  | 0.09275  | 0.26  | 0.12916  | 0.06928  | 0.14036  | 0.27337  | 0.26  | 0.20677  | 0.19538  | 0.24126  | 0.31219  |
| 0.264 | 0.2082   | 0.05528  | 0.08302  | 0.264 | 0.11281  | 0.0643   | 0.1328   | 0.26609  | 0.264 | 0.19793  | 0.18294  | 0.23269  | 0.29788  |
| 0.268 | 0.19071  | 0.04634  | 0.07445  | 0.268 | 0.09744  | 0.05966  | 0.12485  | 0.2591   | 0.268 | 0.18909  | 0.17144  | 0.22455  | 0.28441  |
| 0.272 | 0.17377  | 0.03863  | 0.06627  | 0.272 | 0.08356  | 0.05535  | 0.11769  | 0.25274  | 0.272 | 0.18114  | 0.16058  | 0.21703  | 0.27234  |
| 0.276 | 0.15902  | 0.03155  | 0.05887  | 0.276 | 0.07117  | 0.05156  | 0.11173  | 0.24721  | 0.276 | 0.17407  | 0.15097  | 0.20983  | 0.26112  |
| 0.28  | 0.14536  | 0.02602  | 0.05187  | 0.28  | 0.06027  | 0.04798  | 0.10577  | 0.2427   | 0.28  | 0.167    | 0.14226  | 0.20301  | 0.2513   |
| 0.284 | 0.13333  | 0.0208   | 0.04602  | 0.284 | 0.0507   | 0.04529  | 0.10099  | 0.23915  | 0.284 | 0.16125  | 0.13462  | 0.19697  | 0.24322  |
| 0.288 | 0.1235   | 0.01676  | 0.04096  | 0.288 | 0.04218  | 0.0428   | 0.09662  | 0.23634  | 0.288 | 0.15617  | 0.12775  | 0.19147  | 0.23446  |
| 0.292 | 0.11475  | 0.01335  | 0.03629  | 0.292 | 0.03494  | 0.04088  | 0.09304  | 0.23445  | 0.292 | 0.15144  | 0.12183  | 0.18625  | 0.2271   |

|       |         |         |         |       |         |         |         |         |       |         |         |         |         |
|-------|---------|---------|---------|-------|---------|---------|---------|---------|-------|---------|---------|---------|---------|
| 0.296 | 0.1071  | 0.01075 | 0.0324  | 0.296 | 0.02855 | 0.03935 | 0.09026 | 0.23318 | 0.296 | 0.14747 | 0.11689 | 0.18202 | 0.22099 |
| 0.3   | 0.10109 | 0.00862 | 0.02928 | 0.3   | 0.02349 | 0.03852 | 0.08827 | 0.23265 | 0.3   | 0.14424 | 0.11278 | 0.17812 | 0.21566 |
| 0.304 | 0.09563 | 0.0074  | 0.02617 | 0.304 | 0.01938 | 0.03826 | 0.08708 | 0.2327  | 0.304 | 0.14168 | 0.10956 | 0.17482 | 0.21061 |
| 0.308 | 0.09126 | 0.00628 | 0.02422 | 0.308 | 0.01576 | 0.03803 | 0.08588 | 0.23328 | 0.308 | 0.13969 | 0.10651 | 0.17202 | 0.20668 |
| 0.312 | 0.08743 | 0.0058  | 0.02227 | 0.312 | 0.01269 | 0.03842 | 0.08549 | 0.2344  | 0.312 | 0.1377  | 0.10432 | 0.16943 | 0.20275 |
| 0.316 | 0.0847  | 0.00596 | 0.02071 | 0.316 | 0.01066 | 0.03945 | 0.08588 | 0.23648 | 0.316 | 0.13677 | 0.10282 | 0.16767 | 0.19994 |
| 0.32  | 0.08251 | 0.00638 | 0.02013 | 0.32  | 0.00902 | 0.04058 | 0.08708 | 0.23886 | 0.32  | 0.13589 | 0.10205 | 0.16641 | 0.19714 |
| 0.324 | 0.08033 | 0.00756 | 0.01935 | 0.324 | 0.00798 | 0.04231 | 0.08827 | 0.24163 | 0.324 | 0.13549 | 0.10179 | 0.16531 | 0.19489 |
| 0.328 | 0.07869 | 0.00873 | 0.01966 | 0.328 | 0.00773 | 0.04453 | 0.09026 | 0.24522 | 0.328 | 0.13593 | 0.10179 | 0.16504 | 0.19321 |
| 0.332 | 0.07814 | 0.01091 | 0.02013 | 0.332 | 0.00808 | 0.04728 | 0.09304 | 0.24959 | 0.332 | 0.13624 | 0.10239 | 0.16509 | 0.19181 |
| 0.336 | 0.0776  | 0.01335 | 0.0211  | 0.336 | 0.00862 | 0.05024 | 0.09622 | 0.2542  | 0.336 | 0.13708 | 0.10368 | 0.16548 | 0.19124 |
| 0.34  | 0.07814 | 0.01601 | 0.02266 | 0.34  | 0.00971 | 0.05402 | 0.0998  | 0.25939 | 0.34  | 0.1381  | 0.10565 | 0.16658 | 0.1904  |
| 0.344 | 0.07814 | 0.01921 | 0.02383 | 0.344 | 0.0111  | 0.058   | 0.10417 | 0.26512 | 0.344 | 0.13956 | 0.10775 | 0.16795 | 0.19012 |
| 0.348 | 0.07869 | 0.02341 | 0.02656 | 0.348 | 0.01328 | 0.06298 | 0.10895 | 0.27157 | 0.348 | 0.14146 | 0.11089 | 0.16982 | 0.1904  |
| 0.352 | 0.07978 | 0.02761 | 0.02889 | 0.352 | 0.01561 | 0.06829 | 0.11451 | 0.27856 | 0.352 | 0.1434  | 0.11415 | 0.17174 | 0.19096 |
| 0.356 | 0.08087 | 0.03246 | 0.03162 | 0.356 | 0.01809 | 0.07393 | 0.12048 | 0.28594 | 0.356 | 0.14574 | 0.1178  | 0.17421 | 0.19181 |
| 0.36  | 0.08251 | 0.03783 | 0.03512 | 0.36  | 0.02126 | 0.08056 | 0.12724 | 0.2937  | 0.36  | 0.14835 | 0.12209 | 0.17735 | 0.19293 |
| 0.364 | 0.08525 | 0.04427 | 0.03941 | 0.364 | 0.02528 | 0.08786 | 0.13519 | 0.30278 | 0.364 | 0.15184 | 0.12728 | 0.18108 | 0.19461 |
| 0.368 | 0.08798 | 0.05129 | 0.04408 | 0.368 | 0.02914 | 0.09549 | 0.14314 | 0.31209 | 0.368 | 0.15493 | 0.13239 | 0.18493 | 0.1963  |
| 0.372 | 0.09126 | 0.05831 | 0.04875 | 0.372 | 0.03301 | 0.10346 | 0.15149 | 0.3218  | 0.372 | 0.15856 | 0.13814 | 0.18894 | 0.19854 |
| 0.376 | 0.09454 | 0.06619 | 0.05381 | 0.376 | 0.03752 | 0.11208 | 0.16064 | 0.33218 | 0.376 | 0.1624  | 0.14423 | 0.19389 | 0.20107 |
| 0.38  | 0.09836 | 0.0747  | 0.05965 | 0.38  | 0.04228 | 0.12171 | 0.17018 | 0.3434  | 0.38  | 0.167   | 0.15097 | 0.199   | 0.20359 |
| 0.384 | 0.10328 | 0.08406 | 0.06588 | 0.384 | 0.04753 | 0.13166 | 0.18091 | 0.35504 | 0.384 | 0.17142 | 0.15809 | 0.20483 | 0.20668 |
| 0.388 | 0.10765 | 0.09284 | 0.07211 | 0.388 | 0.05284 | 0.14162 | 0.19125 | 0.36669 | 0.388 | 0.17672 | 0.16539 | 0.21065 | 0.20977 |
| 0.392 | 0.11311 | 0.10295 | 0.07873 | 0.392 | 0.05878 | 0.15256 | 0.20278 | 0.37882 | 0.392 | 0.18202 | 0.1735  | 0.21736 | 0.21341 |
| 0.396 | 0.11967 | 0.11359 | 0.08613 | 0.396 | 0.06423 | 0.16385 | 0.21471 | 0.39144 | 0.396 | 0.18777 | 0.18165 | 0.22444 | 0.21734 |
| 0.4   | 0.12623 | 0.1237  | 0.09353 | 0.4   | 0.07018 | 0.17513 | 0.22664 | 0.40454 | 0.4   | 0.19395 | 0.19023 | 0.23214 | 0.22127 |
| 0.404 | 0.13388 | 0.13434 | 0.10093 | 0.404 | 0.07663 | 0.18674 | 0.23897 | 0.41716 | 0.404 | 0.20058 | 0.19924 | 0.24    | 0.22548 |
| 0.408 | 0.14098 | 0.14552 | 0.10871 | 0.408 | 0.08307 | 0.19869 | 0.25129 | 0.43026 | 0.408 | 0.20721 | 0.20783 | 0.24824 | 0.22969 |
| 0.412 | 0.15027 | 0.15669 | 0.1165  | 0.412 | 0.08951 | 0.21063 | 0.26362 | 0.44337 | 0.412 | 0.21472 | 0.21684 | 0.25698 | 0.23418 |
| 0.416 | 0.15847 | 0.16786 | 0.12429 | 0.416 | 0.09596 | 0.22258 | 0.27515 | 0.45598 | 0.416 | 0.2218  | 0.22585 | 0.26566 | 0.23867 |
| 0.42  | 0.16776 | 0.1785  | 0.13247 | 0.42  | 0.1024  | 0.23419 | 0.28668 | 0.46812 | 0.42  | 0.22931 | 0.23443 | 0.27473 | 0.24316 |
| 0.424 | 0.1776  | 0.18968 | 0.14064 | 0.424 | 0.10884 | 0.2458  | 0.29861 | 0.47976 | 0.424 | 0.23682 | 0.24345 | 0.28385 | 0.24793 |
| 0.428 | 0.18798 | 0.20138 | 0.14921 | 0.428 | 0.11578 | 0.25742 | 0.30974 | 0.49141 | 0.428 | 0.24477 | 0.25203 | 0.2927  | 0.2527  |
| 0.432 | 0.19836 | 0.21202 | 0.15739 | 0.432 | 0.12222 | 0.2687  | 0.32048 | 0.50257 | 0.432 | 0.25273 | 0.26018 | 0.30149 | 0.25747 |
| 0.436 | 0.20874 | 0.22267 | 0.16556 | 0.436 | 0.12867 | 0.27965 | 0.33121 | 0.51228 | 0.436 | 0.26068 | 0.26833 | 0.30974 | 0.26224 |
| 0.44  | 0.21967 | 0.23331 | 0.17374 | 0.44  | 0.13462 | 0.29026 | 0.34115 | 0.52247 | 0.44  | 0.2682  | 0.27563 | 0.31798 | 0.26729 |
| 0.444 | 0.23115 | 0.24448 | 0.18192 | 0.444 | 0.14155 | 0.30088 | 0.3507  | 0.5312  | 0.444 | 0.27571 | 0.28335 | 0.32623 | 0.27263 |
| 0.448 | 0.24262 | 0.25406 | 0.19048 | 0.448 | 0.148   | 0.31084 | 0.35984 | 0.53994 | 0.448 | 0.28278 | 0.29022 | 0.33337 | 0.27768 |
| 0.452 | 0.25355 | 0.2647  | 0.19827 | 0.452 | 0.15395 | 0.32013 | 0.36819 | 0.5477  | 0.452 | 0.28941 | 0.29666 | 0.34051 | 0.28301 |
| 0.456 | 0.26448 | 0.27534 | 0.20684 | 0.456 | 0.16039 | 0.32975 | 0.37654 | 0.55498 | 0.456 | 0.29604 | 0.30352 | 0.34656 | 0.28862 |
| 0.46  | 0.27705 | 0.28492 | 0.21463 | 0.46  | 0.16683 | 0.33838 | 0.38449 | 0.56226 | 0.46  | 0.30311 | 0.30996 | 0.35315 | 0.29423 |
| 0.464 | 0.28798 | 0.29556 | 0.22241 | 0.464 | 0.17328 | 0.347   | 0.39165 | 0.56809 | 0.464 | 0.30885 | 0.31554 | 0.35865 | 0.29985 |
| 0.468 | 0.3     | 0.30513 | 0.23059 | 0.468 | 0.17922 | 0.3553  | 0.39841 | 0.57391 | 0.468 | 0.3146  | 0.32155 | 0.36415 | 0.30574 |
| 0.472 | 0.31148 | 0.31471 | 0.23799 | 0.472 | 0.18567 | 0.3626  | 0.40477 | 0.57925 | 0.472 | 0.31946 | 0.3267  | 0.36909 | 0.31163 |
| 0.476 | 0.32295 | 0.32376 | 0.24539 | 0.476 | 0.19161 | 0.36957 | 0.41074 | 0.58459 | 0.476 | 0.32388 | 0.33185 | 0.37349 | 0.31724 |
| 0.48  | 0.33497 | 0.3328  | 0.25239 | 0.48  | 0.19806 | 0.37587 | 0.4163  | 0.58847 | 0.48  | 0.3283  | 0.33657 | 0.37789 | 0.32314 |
| 0.484 | 0.3459  | 0.34025 | 0.25901 | 0.484 | 0.20351 | 0.38151 | 0.42068 | 0.59187 | 0.484 | 0.33139 | 0.34086 | 0.38118 | 0.32875 |
| 0.488 | 0.35738 | 0.3477  | 0.26563 | 0.488 | 0.20896 | 0.38682 | 0.42505 | 0.59526 | 0.488 | 0.33404 | 0.34472 | 0.38448 | 0.33464 |
| 0.492 | 0.36776 | 0.35462 | 0.27147 | 0.492 | 0.21491 | 0.39147 | 0.42903 | 0.59769 | 0.492 | 0.33669 | 0.34858 | 0.38778 | 0.33997 |
| 0.496 | 0.3776  | 0.361   | 0.27731 | 0.496 | 0.21987 | 0.39578 | 0.43221 | 0.60012 | 0.496 | 0.3389  | 0.35159 | 0.39053 | 0.34531 |
| 0.5   | 0.38689 | 0.36685 | 0.28277 | 0.5   | 0.22433 | 0.3991  | 0.43459 | 0.60109 | 0.5   | 0.34023 | 0.35459 | 0.39217 | 0.35008 |
| 0.504 | 0.39508 | 0.37164 | 0.28783 | 0.504 | 0.22879 | 0.40242 | 0.43658 | 0.60206 | 0.504 | 0.34111 | 0.35674 | 0.39437 | 0.35513 |
| 0.508 | 0.40273 | 0.37643 | 0.2925  | 0.508 | 0.23275 | 0.4054  | 0.43857 | 0.60206 | 0.508 | 0.34199 | 0.35888 | 0.39547 | 0.35962 |
| 0.512 | 0.40929 | 0.38015 | 0.29678 | 0.512 | 0.23672 | 0.40772 | 0.44016 | 0.60206 | 0.512 | 0.34244 | 0.36017 | 0.39657 | 0.36383 |
| 0.516 | 0.41421 | 0.38281 | 0.30029 | 0.516 | 0.2392  | 0.40938 | 0.44056 | 0.6006  | 0.516 | 0.34244 | 0.3606  | 0.39657 | 0.3672  |
| 0.52  | 0.41858 | 0.38601 | 0.30418 | 0.52  | 0.24266 | 0.41137 | 0.44215 | 0.59963 | 0.52  | 0.34288 | 0.36146 | 0.39712 | 0.37056 |
| 0.524 | 0.4224  | 0.38867 | 0.30769 | 0.524 | 0.24564 | 0.41303 | 0.44254 | 0.59818 | 0.524 | 0.34244 | 0.36146 | 0.39712 | 0.37281 |
| 0.528 | 0.42459 | 0.39026 | 0.3108  | 0.528 | 0.24812 | 0.41469 | 0.44334 | 0.59575 | 0.528 | 0.34199 | 0.36146 | 0.39657 | 0.37477 |
| 0.532 | 0.42568 | 0.39186 | 0.31431 | 0.532 | 0.25109 | 0.41569 | 0.44334 | 0.59332 | 0.532 | 0.34111 | 0.36103 | 0.39547 | 0.37646 |
| 0.536 | 0.42678 | 0.39346 | 0.31703 | 0.536 | 0.25307 | 0.41702 | 0.44374 | 0.5909  | 0.536 | 0.34067 | 0.3606  | 0.39492 | 0.3773  |
| 0.54  | 0.42678 | 0.39505 | 0.32015 | 0.54  | 0.25506 | 0.41834 | 0.44374 | 0.58798 | 0.54  | 0.34023 | 0.3606  | 0.39327 | 0.37786 |
| 0.544 | 0.42678 | 0.39612 | 0.32248 | 0.544 | 0.25753 | 0.41967 | 0.44414 | 0.58556 | 0.544 | 0.33934 | 0.36017 | 0.39217 | 0.37814 |
| 0.548 | 0.42568 | 0.39718 | 0.32482 | 0.548 | 0.25952 | 0.42066 | 0.44374 | 0.58265 | 0.548 | 0.3389  | 0.35974 | 0.39053 | 0.37758 |
| 0.552 | 0.42459 | 0.39878 | 0.32793 | 0.552 | 0.26249 | 0.42199 | 0.44374 | 0.58022 | 0.552 | 0.33846 | 0.35931 | 0.38888 | 0.37702 |
| 0.556 | 0.4235  | 0.40037 | 0.33066 | 0.556 | 0.26447 | 0.42365 | 0.44374 | 0.57779 | 0.556 | 0.33802 | 0.35888 | 0.38723 | 0.37646 |
| 0.56  | 0.4224  | 0.40144 | 0.33339 | 0.56  | 0.26695 | 0.42531 | 0.44414 | 0.57585 | 0.56  | 0.33758 | 0.35931 | 0.38558 | 0.37533 |
| 0.564 | 0.42077 | 0.40303 | 0.33611 | 0.564 | 0.26992 | 0.42697 | 0.44414 | 0.57391 | 0.564 | 0.33713 | 0.35931 | 0.38393 | 0.37421 |
| 0.568 | 0.41913 | 0.40463 | 0.33845 | 0.568 | 0.27191 | 0.42863 | 0.44414 | 0.57197 | 0.568 | 0.33713 | 0.35974 | 0.38228 | 0.37281 |
| 0.572 | 0.41858 | 0.40676 | 0.34195 | 0.572 | 0.27538 | 0.43062 | 0.44453 | 0.571   | 0.572 | 0.33802 | 0.3606  | 0.38063 | 0.37197 |
| 0.576 | 0.41749 | 0.40889 | 0.34468 | 0.576 | 0.27835 | 0.43261 | 0.44533 | 0.57003 | 0.576 | 0.33846 | 0.36146 | 0.37953 | 0.37112 |
| 0.58  | 0.41585 | 0.41101 | 0.3474  | 0.58  | 0.28083 | 0.43427 | 0.44493 | 0.56906 | 0.58  | 0.3389  | 0.36231 | 0.37789 | 0.37    |
| 0.584 | 0.4153  | 0.41314 | 0.35052 | 0.584 | 0.2838  | 0.43626 | 0.44533 | 0.56857 | 0.584 | 0.33979 | 0.3636  | 0.37734 | 0.36944 |
| 0.588 | 0.4153  | 0.4158  | 0.35363 | 0.588 | 0.28678 | 0.43792 | 0.44573 | 0.56809 | 0.588 | 0.34067 | 0.36489 | 0.37624 | 0.36916 |
| 0.592 | 0.41475 | 0.41846 | 0.35636 | 0.592 | 0.28975 | 0.43958 | 0.44573 | 0.56809 | 0.592 | 0.34199 | 0.36661 | 0.37569 | 0.36916 |
| 0.596 | 0.41475 | 0.42059 | 0.35947 | 0.596 |         |         |         |         |       |         |         |         |         |

|       |         |         |         |         |         |         |         |         |       |         |         |         |         |
|-------|---------|---------|---------|---------|---------|---------|---------|---------|-------|---------|---------|---------|---------|
| 0.708 | 0.40984 | 0.3759  | 0.32093 | 0.708   | 0.26695 | 0.31648 | 0.33519 | 0.47782 | 0.708 | 0.33758 | 0.34729 | 0.33942 | 0.40283 |
| 0.712 | 0.40656 | 0.37217 | 0.31625 | 0.712   | 0.26398 | 0.31051 | 0.33042 | 0.47297 | 0.712 | 0.33537 | 0.34515 | 0.33667 | 0.40227 |
| 0.716 | 0.40383 | 0.36845 | 0.31197 | 0.716   | 0.261   | 0.30486 | 0.32565 | 0.46763 | 0.716 | 0.33316 | 0.343   | 0.33392 | 0.40171 |
| 0.72  | 0.40055 | 0.36472 | 0.30769 | 0.72    | 0.25803 | 0.29922 | 0.32087 | 0.46229 | 0.72  | 0.33095 | 0.34043 | 0.33117 | 0.40115 |
| 0.724 | 0.39672 | 0.361   | 0.30301 | 0.724   | 0.25555 | 0.29391 | 0.3165  | 0.45695 | 0.724 | 0.3283  | 0.33828 | 0.32842 | 0.40031 |
| 0.728 | 0.39399 | 0.35728 | 0.29912 | 0.728   | 0.25258 | 0.28927 | 0.31252 | 0.45259 | 0.728 | 0.32653 | 0.33614 | 0.32568 | 0.39947 |
| 0.732 | 0.39126 | 0.35462 | 0.296   | 0.732   | 0.25059 | 0.28496 | 0.30895 | 0.44822 | 0.732 | 0.32432 | 0.33442 | 0.32348 | 0.39834 |
| 0.736 | 0.38907 | 0.35196 | 0.2925  | 0.736   | 0.24861 | 0.28097 | 0.30577 | 0.44385 | 0.736 | 0.32255 | 0.33313 | 0.32128 | 0.3975  |
| 0.74  | 0.38634 | 0.34876 | 0.28939 | 0.74    | 0.24663 | 0.27732 | 0.30179 | 0.43997 | 0.74  | 0.32034 | 0.33142 | 0.31908 | 0.3961  |
| 0.744 | 0.3847  | 0.34663 | 0.28705 | 0.744   | 0.24514 | 0.27401 | 0.29901 | 0.43609 | 0.744 | 0.31902 | 0.33013 | 0.31743 | 0.39498 |
| 0.748 | 0.38251 | 0.34451 | 0.28432 | 0.748   | 0.24366 | 0.27102 | 0.29622 | 0.43269 | 0.748 | 0.31769 | 0.32927 | 0.31578 | 0.39385 |
| 0.752 | 0.38087 | 0.34238 | 0.28199 | 0.752   | 0.24266 | 0.26837 | 0.29384 | 0.42929 | 0.752 | 0.31636 | 0.32841 | 0.31413 | 0.39273 |
| 0.756 | 0.37923 | 0.34078 | 0.28043 | 0.756   | 0.24167 | 0.26571 | 0.29145 | 0.42638 | 0.756 | 0.31504 | 0.32713 | 0.31304 | 0.39133 |
| 0.76  | 0.37814 | 0.33865 | 0.27809 | 0.76    | 0.24118 | 0.26339 | 0.28907 | 0.42347 | 0.76  | 0.31371 | 0.32627 | 0.31194 | 0.38993 |
| 0.764 | 0.3776  | 0.33759 | 0.27693 | 0.764   | 0.24019 | 0.26173 | 0.28748 | 0.42104 | 0.764 | 0.31283 | 0.32627 | 0.31084 | 0.3888  |
| 0.768 | 0.37705 | 0.33653 | 0.27537 | 0.768   | 0.23969 | 0.25974 | 0.28588 | 0.4191  | 0.768 | 0.31194 | 0.32541 | 0.30974 | 0.38768 |
| 0.772 | 0.3765  | 0.33493 | 0.27381 | 0.772   | 0.23969 | 0.25808 | 0.2839  | 0.41667 | 0.772 | 0.31106 | 0.32498 | 0.30919 | 0.38628 |
| 0.776 | 0.3776  | 0.33546 | 0.27381 | 0.776   | 0.24019 | 0.25708 | 0.2831  | 0.4157  | 0.776 | 0.31106 | 0.32584 | 0.30919 | 0.38572 |
| 0.78  | 0.37814 | 0.33493 | 0.27264 | 0.78    | 0.23969 | 0.25609 | 0.28191 | 0.41376 | 0.78  | 0.31106 | 0.32541 | 0.30864 | 0.38487 |
| 0.784 | 0.37814 | 0.3344  | 0.27225 | 0.784   | 0.23969 | 0.25509 | 0.28072 | 0.41231 | 0.784 | 0.31062 | 0.32584 | 0.30864 | 0.38375 |
| 0.788 | 0.37814 | 0.33387 | 0.27147 | 0.788   | 0.24019 | 0.2541  | 0.27952 | 0.41085 | 0.788 | 0.31018 | 0.32584 | 0.30809 | 0.38291 |
| 0.792 | 0.37923 | 0.33387 | 0.27108 | 0.792   | 0.24019 | 0.25343 | 0.27833 | 0.40988 | 0.792 | 0.31018 | 0.32584 | 0.30809 | 0.38207 |
| 0.796 | 0.38033 | 0.33387 | 0.2707  | 0.796   | 0.24068 | 0.25277 | 0.27753 | 0.40891 | 0.796 | 0.31018 | 0.32627 | 0.30864 | 0.38123 |
| 0.8   | 0.38197 | 0.33387 | 0.2707  | 0.8     | 0.24167 | 0.25244 | 0.27674 | 0.40842 | 0.8   | 0.31018 | 0.3267  | 0.30864 | 0.38095 |
| 0.804 | 0.38306 | 0.33387 | 0.27031 | 0.804   | 0.24167 | 0.25211 | 0.27594 | 0.40745 | 0.804 | 0.31062 | 0.32713 | 0.30919 | 0.38038 |
| 0.808 | 0.3847  | 0.3344  | 0.2707  | 0.808   | 0.24217 | 0.25178 | 0.27555 | 0.40697 | 0.808 | 0.31106 | 0.32755 | 0.30974 | 0.3801  |
| 0.812 | 0.38634 | 0.33493 | 0.27108 | 0.812   | 0.24316 | 0.25178 | 0.27475 | 0.40697 | 0.812 | 0.31106 | 0.32841 | 0.31029 | 0.3801  |
| 0.816 | 0.38798 | 0.33546 | 0.27108 | 0.816   | 0.24366 | 0.25144 | 0.27435 | 0.40648 | 0.816 | 0.3115  | 0.32927 | 0.31084 | 0.37982 |
| 0.82  | 0.38962 | 0.33599 | 0.27147 | 0.82    | 0.24465 | 0.25178 | 0.27396 | 0.40648 | 0.82  | 0.31194 | 0.33013 | 0.31139 | 0.37982 |
| 0.824 | 0.39071 | 0.33599 | 0.27147 | 0.824   | 0.24514 | 0.25144 | 0.27316 | 0.40551 | 0.824 | 0.31194 | 0.33013 | 0.31194 | 0.37926 |
| 0.828 | 0.39344 | 0.33653 | 0.27225 | 0.828   | 0.24663 | 0.25178 | 0.27316 | 0.406   | 0.828 | 0.31283 | 0.33142 | 0.31304 | 0.37982 |
| 0.832 | 0.39563 | 0.33759 | 0.27303 | 0.832   | 0.24762 | 0.25211 | 0.27316 | 0.406   | 0.832 | 0.31371 | 0.33227 | 0.31359 | 0.3801  |
| 0.836 | 0.39727 | 0.33865 | 0.27381 | 0.836   | 0.24812 | 0.25211 | 0.27276 | 0.406   | 0.836 | 0.31415 | 0.33313 | 0.31468 | 0.3801  |
| 0.84  | 0.39945 | 0.33919 | 0.27459 | 0.84    | 0.2501  | 0.25277 | 0.27276 | 0.40648 | 0.84  | 0.31504 | 0.33485 | 0.31578 | 0.38067 |
| 0.844 | 0.40164 | 0.34025 | 0.27537 | 0.844   | 0.25159 | 0.25343 | 0.27276 | 0.40697 | 0.844 | 0.31592 | 0.33571 | 0.31688 | 0.38123 |
| 0.848 | 0.40328 | 0.34131 | 0.27654 | 0.848   | 0.25258 | 0.2541  | 0.27316 | 0.40745 | 0.848 | 0.31636 | 0.337   | 0.31798 | 0.38179 |
| 0.852 | 0.40546 | 0.34291 | 0.2777  | 0.852   | 0.25357 | 0.25476 | 0.27356 | 0.40794 | 0.852 | 0.31725 | 0.33785 | 0.31908 | 0.38235 |
| 0.856 | 0.40765 | 0.34344 | 0.27848 | 0.856   | 0.25506 | 0.25543 | 0.27356 | 0.40842 | 0.856 | 0.31857 | 0.33914 | 0.32018 | 0.38291 |
| 0.86  | 0.40929 | 0.34451 | 0.27965 | 0.86    | 0.25654 | 0.25609 | 0.27396 | 0.4094  | 0.86  | 0.31946 | 0.34086 | 0.32183 | 0.38347 |
| 0.864 | 0.41202 | 0.3461  | 0.28082 | 0.864   | 0.25852 | 0.25742 | 0.27435 | 0.41037 | 0.864 | 0.3199  | 0.34214 | 0.32293 | 0.38431 |
| 0.868 | 0.41311 | 0.34717 | 0.28199 | 0.868   | 0.25952 | 0.25841 | 0.27475 | 0.41085 | 0.868 | 0.32122 | 0.343   | 0.32458 | 0.38459 |
| 0.872 | 0.4153  | 0.34823 | 0.28354 | 0.872   | 0.2615  | 0.25941 | 0.27555 | 0.41182 | 0.872 | 0.32211 | 0.34472 | 0.32568 | 0.38572 |
| 0.876 | 0.41803 | 0.35036 | 0.2851  | 0.876   | 0.26348 | 0.26107 | 0.27634 | 0.41328 | 0.876 | 0.32299 | 0.34644 | 0.32787 | 0.38656 |
| 0.88  | 0.41967 | 0.35142 | 0.28627 | 0.88    | 0.26497 | 0.26239 | 0.27714 | 0.41425 | 0.88  | 0.32432 | 0.34815 | 0.32897 | 0.38712 |
| 0.884 | 0.42131 | 0.35302 | 0.28783 | 0.884   | 0.26646 | 0.26372 | 0.27793 | 0.41522 | 0.884 | 0.32564 | 0.34944 | 0.33062 | 0.38768 |
| 0.888 | 0.4235  | 0.35408 | 0.28939 | 0.888   | 0.26844 | 0.26472 | 0.27873 | 0.41667 | 0.888 | 0.32653 | 0.35073 | 0.33227 | 0.38852 |
| 0.892 | 0.42514 | 0.35568 | 0.29094 | 0.892   | 0.27042 | 0.26671 | 0.27952 | 0.41765 | 0.892 | 0.32785 | 0.35244 | 0.33392 | 0.38908 |
| 0.896 | 0.42678 | 0.35728 | 0.2925  | 0.896   | 0.2724  | 0.26837 | 0.28072 | 0.4191  | 0.896 | 0.32918 | 0.35416 | 0.33557 | 0.38993 |
| 0.9   | 0.42842 | 0.35887 | 0.29406 | 0.9     | 0.27439 | 0.27002 | 0.28151 | 0.42056 | 0.9   | 0.33006 | 0.35588 | 0.33722 | 0.39021 |
| 0.904 | 0.4306  | 0.36047 | 0.29562 | 0.904   | 0.27637 | 0.27135 | 0.2831  | 0.42201 | 0.904 | 0.33139 | 0.35759 | 0.33942 | 0.39133 |
| 0.908 | 0.43279 | 0.36206 | 0.29717 | 0.908   | 0.27835 | 0.27301 | 0.28429 | 0.42347 | 0.908 | 0.33271 | 0.35931 | 0.34106 | 0.39217 |
| 0.912 | 0.43388 | 0.36313 | 0.29873 | 0.912   | 0.28083 | 0.275   | 0.28549 | 0.42492 | 0.912 | 0.33404 | 0.36103 | 0.34326 | 0.39273 |
| 0.916 | 0.43607 | 0.36526 | 0.30068 | 0.916   | 0.28281 | 0.27666 | 0.28668 | 0.42687 | 0.916 | 0.33537 | 0.36274 | 0.34491 | 0.39329 |
| 0.92  | 0.43716 | 0.36685 | 0.30224 | 0.92    | 0.28529 | 0.27865 | 0.28787 | 0.42832 | 0.92  | 0.33669 | 0.36446 | 0.34711 | 0.39385 |
| 0.924 | 0.4388  | 0.36845 | 0.30418 | 0.924   | 0.28777 | 0.28064 | 0.28986 | 0.43026 | 0.924 | 0.33846 | 0.36661 | 0.34931 | 0.3947  |
| 0.928 | 0.44044 | 0.37005 | 0.30574 | 0.928   | 0.29025 | 0.28263 | 0.29105 | 0.4322  | 0.928 | 0.33979 | 0.36832 | 0.35151 | 0.39554 |
| 0.932 | 0.44208 | 0.37164 | 0.3073  | 0.932   | 0.29223 | 0.28429 | 0.29264 | 0.43415 | 0.932 | 0.34155 | 0.37047 | 0.3537  | 0.3961  |
| 0.936 | 0.44317 | 0.37324 | 0.30885 | 0.936   | 0.29471 | 0.28661 | 0.29423 | 0.43609 | 0.936 | 0.34332 | 0.37218 | 0.3559  | 0.39694 |
| 0.94  | 0.44426 | 0.37483 | 0.3108  | 0.94    | 0.29718 | 0.28861 | 0.29622 | 0.43851 | 0.94  | 0.34509 | 0.37476 | 0.35865 | 0.39778 |
| 0.944 | 0.4459  | 0.37643 | 0.31236 | 0.944   | 0.29966 | 0.29093 | 0.29781 | 0.44045 | 0.944 | 0.34686 | 0.3769  | 0.36085 | 0.39891 |
| 0.948 | 0.44699 | 0.37803 | 0.31392 | 0.948   | 0.30214 | 0.29325 | 0.2998  | 0.44288 | 0.948 | 0.34818 | 0.37905 | 0.36305 | 0.39975 |
| 0.952 | 0.44809 | 0.37962 | 0.31547 | 0.952   | 0.30462 | 0.29524 | 0.30179 | 0.44531 | 0.952 | 0.35039 | 0.3812  | 0.36579 | 0.40059 |
| 0.956 | 0.44918 | 0.38122 | 0.31742 | 0.956   | 0.3071  | 0.2979  | 0.30378 | 0.44773 | 0.956 | 0.3526  | 0.38377 | 0.36799 | 0.40199 |
| 0.96  | 0.45027 | 0.38335 | 0.31937 | 0.96    | 0.31007 | 0.29989 | 0.30577 | 0.45065 | 0.96  | 0.35481 | 0.38635 | 0.37074 | 0.40311 |
| 0.964 | 0.45082 | 0.38441 | 0.32093 | 0.964   | 0.31255 | 0.30221 | 0.30775 | 0.45307 | 0.964 | 0.35658 | 0.38849 | 0.37349 | 0.40424 |
| 0.968 | 0.45191 | 0.38654 | 0.32287 | 0.968   | 0.31503 | 0.30486 | 0.31014 | 0.4555  | 0.968 | 0.35923 | 0.39149 | 0.37624 | 0.40564 |
| 0.972 | 0.45246 | 0.38867 | 0.32443 | 0.972   | 0.318   | 0.30719 | 0.31252 | 0.4589  | 0.972 | 0.36188 | 0.39407 | 0.37898 | 0.40704 |
| 0.976 | 0.45301 | 0.39026 | 0.32677 | 0.976   | 0.32048 | 0.30984 | 0.31491 | 0.46132 | 0.976 | 0.36409 | 0.39664 | 0.38173 | 0.40873 |
| 0.98  | 0.45301 | 0.39239 | 0.32871 | 0.98    | 0.32395 | 0.3125  | 0.31769 | 0.46472 | 0.98  | 0.36674 | 0.39965 | 0.38503 | 0.41041 |
| 0.984 | 0.4541  | 0.39399 | 0.33066 | 0.984   | 0.32692 | 0.31482 | 0.32008 | 0.46812 | 0.984 | 0.36984 | 0.40308 | 0.38778 | 0.41209 |
| 0.988 | 0.45464 | 0.39558 | 0.33261 | 0.988   | 0.3299  | 0.31747 | 0.32286 | 0.47151 | 0.988 | 0.37249 | 0.40609 | 0.39107 | 0.41406 |
| 0.992 | 0.45519 | 0.39771 | 0.33494 | 0.992   | 0.33287 | 0.32046 | 0.32565 | 0.47491 | 0.992 | 0.37558 | 0.40952 | 0.39437 | 0.41602 |
| 0.996 | 0.45574 | 0.39984 | 0.33689 | 0.996   | 0.33584 | 0.32278 | 0.32803 | 0.47782 | 0.996 | 0.37867 | 0.41252 | 0.39767 | 0.41799 |
| 1     | 0.45683 | 0.40197 | 0.33923 | 1       | 0.33882 | 0.32577 | 0.33082 | 0.4817  | 1     | 0.38177 | 0.41638 | 0.40097 | 0.42023 |
| 1.004 | 0.45792 | 0.40356 | 0.34195 | 1.004   | 0.34278 | 0.32875 | 0.334   | 0.48559 | 1.004 | 0.3853  | 0.41982 | 0.40426 | 0.42276 |
| 1.008 | 0.45847 | 0.40623 | 0.34429 | 1.008</ |         |         |         |         |       |         |         |         |         |

|       |         |         |         |       |         |         |         |         |       |         |         |         |         |
|-------|---------|---------|---------|-------|---------|---------|---------|---------|-------|---------|---------|---------|---------|
| 1.12  | 0.55027 | 0.52168 | 0.47278 | 1.12  | 0.50139 | 0.45816 | 0.47078 | 0.63506 | 1.12  | 0.53555 | 0.57774 | 0.56584 | 0.54792 |
| 1.124 | 0.55574 | 0.52807 | 0.4794  | 1.124 | 0.50882 | 0.4648  | 0.47674 | 0.64137 | 1.124 | 0.54262 | 0.5846  | 0.57353 | 0.55409 |
| 1.128 | 0.56175 | 0.53445 | 0.48641 | 1.128 | 0.51725 | 0.47143 | 0.4839  | 0.64768 | 1.128 | 0.55013 | 0.59233 | 0.58123 | 0.56054 |
| 1.132 | 0.56831 | 0.5419  | 0.49381 | 1.132 | 0.52567 | 0.4784  | 0.49066 | 0.65398 | 1.132 | 0.55721 | 0.60005 | 0.58947 | 0.567   |
| 1.136 | 0.57432 | 0.54935 | 0.50121 | 1.136 | 0.5336  | 0.4857  | 0.49781 | 0.66078 | 1.136 | 0.56516 | 0.60735 | 0.59771 | 0.57373 |
| 1.14  | 0.58087 | 0.55626 | 0.50861 | 1.14  | 0.54253 | 0.493   | 0.50537 | 0.66757 | 1.14  | 0.57223 | 0.6155  | 0.60541 | 0.58019 |
| 1.144 | 0.58798 | 0.56318 | 0.51639 | 1.144 | 0.55095 | 0.49997 | 0.51292 | 0.67388 | 1.144 | 0.57974 | 0.62322 | 0.6142  | 0.58692 |
| 1.148 | 0.59454 | 0.57116 | 0.52496 | 1.148 | 0.56037 | 0.50826 | 0.52087 | 0.68116 | 1.148 | 0.58814 | 0.63138 | 0.62299 | 0.59422 |
| 1.152 | 0.60219 | 0.57861 | 0.53314 | 1.152 | 0.56929 | 0.51589 | 0.52883 | 0.68844 | 1.152 | 0.59654 | 0.63953 | 0.63234 | 0.60152 |
| 1.156 | 0.60929 | 0.58659 | 0.54092 | 1.156 | 0.57821 | 0.52386 | 0.53678 | 0.69523 | 1.156 | 0.60493 | 0.64768 | 0.64113 | 0.60853 |
| 1.16  | 0.61639 | 0.59457 | 0.54949 | 1.16  | 0.58812 | 0.53215 | 0.54553 | 0.703   | 1.16  | 0.61333 | 0.65627 | 0.64992 | 0.61611 |
| 1.164 | 0.62404 | 0.60309 | 0.55845 | 1.164 | 0.59754 | 0.54078 | 0.55388 | 0.71028 | 1.164 | 0.62172 | 0.66528 | 0.65927 | 0.62397 |
| 1.168 | 0.63224 | 0.61213 | 0.56701 | 1.168 | 0.60745 | 0.54974 | 0.56223 | 0.71804 | 1.168 | 0.63056 | 0.67386 | 0.66861 | 0.63154 |
| 1.172 | 0.64044 | 0.62064 | 0.57636 | 1.172 | 0.61737 | 0.5587  | 0.57097 | 0.72532 | 1.172 | 0.63984 | 0.6833  | 0.6785  | 0.6394  |
| 1.176 | 0.64809 | 0.62969 | 0.58531 | 1.176 | 0.62778 | 0.56832 | 0.58012 | 0.73309 | 1.176 | 0.64912 | 0.69231 | 0.68839 | 0.64726 |
| 1.18  | 0.65628 | 0.63873 | 0.59505 | 1.18  | 0.63818 | 0.57827 | 0.58966 | 0.74085 | 1.18  | 0.65884 | 0.70133 | 0.69883 | 0.65511 |
| 1.184 | 0.66612 | 0.64884 | 0.60556 | 1.184 | 0.64958 | 0.58889 | 0.6004  | 0.74959 | 1.184 | 0.66901 | 0.7112  | 0.70983 | 0.66437 |
| 1.188 | 0.67432 | 0.65789 | 0.61529 | 1.188 | 0.6595  | 0.59885 | 0.60994 | 0.75687 | 1.188 | 0.67829 | 0.72021 | 0.71972 | 0.67251 |
| 1.192 | 0.68306 | 0.668   | 0.62542 | 1.192 | 0.6699  | 0.60913 | 0.61988 | 0.76512 | 1.192 | 0.68801 | 0.72965 | 0.73016 | 0.68121 |
| 1.196 | 0.69235 | 0.67811 | 0.63632 | 1.196 | 0.68081 | 0.61975 | 0.63022 | 0.77385 | 1.196 | 0.69817 | 0.73909 | 0.74005 | 0.69019 |
| 1.2   | 0.70164 | 0.68768 | 0.64683 | 1.2   | 0.69122 | 0.6307  | 0.64095 | 0.7821  | 1.2   | 0.70834 | 0.74853 | 0.74995 | 0.69945 |
| 1.204 | 0.71038 | 0.69779 | 0.65735 | 1.204 | 0.70212 | 0.64198 | 0.65209 | 0.78987 | 1.204 | 0.7185  | 0.75797 | 0.76039 | 0.70843 |
| 1.208 | 0.72022 | 0.70843 | 0.66825 | 1.208 | 0.71253 | 0.65293 | 0.66322 | 0.79812 | 1.208 | 0.72822 | 0.76741 | 0.77083 | 0.71769 |
| 1.212 | 0.7306  | 0.71907 | 0.67915 | 1.212 | 0.72343 | 0.66521 | 0.67435 | 0.80685 | 1.212 | 0.73927 | 0.77728 | 0.78127 | 0.72723 |
| 1.216 | 0.74044 | 0.72972 | 0.69083 | 1.216 | 0.73483 | 0.67715 | 0.68588 | 0.8151  | 1.216 | 0.75032 | 0.78715 | 0.79226 | 0.73706 |
| 1.22  | 0.75027 | 0.73982 | 0.70174 | 1.22  | 0.74574 | 0.68943 | 0.69702 | 0.82335 | 1.22  | 0.76048 | 0.79616 | 0.80215 | 0.74688 |
| 1.224 | 0.76066 | 0.751   | 0.7142  | 1.224 | 0.75714 | 0.70204 | 0.70895 | 0.83209 | 1.224 | 0.77153 | 0.80646 | 0.81315 | 0.75726 |
| 1.228 | 0.77158 | 0.76217 | 0.72627 | 1.228 | 0.76854 | 0.71531 | 0.72127 | 0.83985 | 1.228 | 0.78302 | 0.81633 | 0.82304 | 0.76764 |
| 1.232 | 0.78197 | 0.77334 | 0.73873 | 1.232 | 0.78043 | 0.72825 | 0.734   | 0.8481  | 1.232 | 0.79407 | 0.82577 | 0.83348 | 0.77831 |
| 1.236 | 0.7929  | 0.78399 | 0.75119 | 1.236 | 0.79084 | 0.74086 | 0.74632 | 0.85635 | 1.236 | 0.80468 | 0.83479 | 0.84282 | 0.78869 |
| 1.24  | 0.80383 | 0.79622 | 0.76404 | 1.24  | 0.80224 | 0.75446 | 0.75944 | 0.8646  | 1.24  | 0.81572 | 0.84466 | 0.85326 | 0.79964 |
| 1.244 | 0.81585 | 0.80793 | 0.77728 | 1.244 | 0.81414 | 0.76873 | 0.77336 | 0.87334 | 1.244 | 0.82721 | 0.85453 | 0.86371 | 0.81114 |
| 1.248 | 0.82787 | 0.82016 | 0.79207 | 1.248 | 0.82653 | 0.78333 | 0.78728 | 0.88159 | 1.248 | 0.8387  | 0.8644  | 0.87305 | 0.82265 |
| 1.252 | 0.83934 | 0.83293 | 0.80531 | 1.252 | 0.83793 | 0.7976  | 0.80119 | 0.89032 | 1.252 | 0.85019 | 0.87427 | 0.88294 | 0.83415 |
| 1.256 | 0.85191 | 0.84517 | 0.81894 | 1.256 | 0.85032 | 0.81253 | 0.8159  | 0.89906 | 1.256 | 0.86257 | 0.88414 | 0.89228 | 0.84622 |
| 1.26  | 0.86393 | 0.85794 | 0.83413 | 1.26  | 0.8632  | 0.82812 | 0.83101 | 0.90828 | 1.26  | 0.87406 | 0.89443 | 0.90218 | 0.85857 |
| 1.264 | 0.8765  | 0.87071 | 0.84892 | 1.264 | 0.87559 | 0.84372 | 0.84612 | 0.91701 | 1.264 | 0.88599 | 0.90388 | 0.91152 | 0.87119 |
| 1.268 | 0.88907 | 0.88348 | 0.86411 | 1.268 | 0.88799 | 0.85998 | 0.86163 | 0.92575 | 1.268 | 0.89792 | 0.91417 | 0.92141 | 0.88382 |
| 1.272 | 0.90109 | 0.89731 | 0.87968 | 1.272 | 0.90087 | 0.87624 | 0.87753 | 0.934   | 1.272 | 0.91073 | 0.9249  | 0.93075 | 0.89701 |
| 1.276 | 0.91475 | 0.91115 | 0.89565 | 1.276 | 0.91525 | 0.89283 | 0.89463 | 0.94322 | 1.276 | 0.92355 | 0.93563 | 0.9401  | 0.91076 |
| 1.28  | 0.92842 | 0.92551 | 0.912   | 1.28  | 0.92912 | 0.91008 | 0.91093 | 0.95293 | 1.28  | 0.93592 | 0.94593 | 0.94999 | 0.92479 |
| 1.284 | 0.94098 | 0.93935 | 0.92835 | 1.284 | 0.94251 | 0.927   | 0.92763 | 0.96166 | 1.284 | 0.94785 | 0.95623 | 0.95933 | 0.93882 |
| 1.288 | 0.95628 | 0.95424 | 0.94627 | 1.288 | 0.95688 | 0.94558 | 0.94553 | 0.97137 | 1.288 | 0.96155 | 0.96739 | 0.96922 | 0.95398 |
| 1.292 | 0.97104 | 0.96914 | 0.96379 | 1.292 | 0.97125 | 0.9635  | 0.96302 | 0.98107 | 1.292 | 0.97437 | 0.97811 | 0.97967 | 0.96913 |
| 1.296 | 0.98525 | 0.98404 | 0.9817  | 1.296 | 0.98563 | 0.98142 | 0.98131 | 0.99029 | 1.296 | 0.98674 | 0.98884 | 0.98956 | 0.98429 |
| 1.3   | 1       | 1       | 1       | 1.3   | 1       | 1       | 1       | 1       | 1.3   | 1       | 1       | 1       | 1       |

#### Water-ABS (Spring)

|       |         |         |         |
|-------|---------|---------|---------|
| 0.004 | 0.08234 | 0.10855 | 0.10996 |
| 0.008 | 0.07699 | 0.10222 | 0.10192 |
| 0.012 | 0.07232 | 0.09703 | 0.09561 |
| 0.016 | 0.06788 | 0.09272 | 0.09015 |
| 0.02  | 0.06441 | 0.08955 | 0.08613 |
| 0.024 | 0.06089 | 0.08667 | 0.0824  |
| 0.028 | 0.05855 | 0.08437 | 0.07896 |
| 0.032 | 0.05599 | 0.08206 | 0.0758  |
| 0.036 | 0.05372 | 0.08033 | 0.07351 |
| 0.04  | 0.05178 | 0.07889 | 0.0715  |
| 0.044 | 0.05024 | 0.07745 | 0.06949 |
| 0.048 | 0.04854 | 0.07601 | 0.06748 |
| 0.052 | 0.04655 | 0.07478 | 0.06576 |
| 0.056 | 0.0449  | 0.0738  | 0.06432 |
| 0.06  | 0.04285 | 0.07276 | 0.06317 |
| 0.064 | 0.04114 | 0.07187 | 0.06202 |
| 0.068 | 0.03949 | 0.07103 | 0.06088 |
| 0.072 | 0.03818 | 0.07011 | 0.06002 |
| 0.076 | 0.03687 | 0.06939 | 0.05887 |
| 0.08  | 0.03539 | 0.06856 | 0.05801 |
| 0.084 | 0.03414 | 0.06752 | 0.05686 |
| 0.088 | 0.03249 | 0.06686 | 0.05611 |
| 0.092 | 0.03124 | 0.06599 | 0.05482 |
| 0.096 | 0.02987 | 0.06502 | 0.05373 |
| 0.1   | 0.02845 | 0.06424 | 0.05281 |
| 0.104 | 0.02714 | 0.06355 | 0.05175 |
| 0.108 | 0.02589 | 0.06271 | 0.05112 |
| 0.112 | 0.02441 | 0.06176 | 0.05006 |
| 0.116 | 0.0231  | 0.06093 | 0.04942 |
| 0.12  | 0.02162 | 0.05989 | 0.04865 |
| 0.124 | 0.02048 | 0.059   | 0.04756 |
| 0.128 | 0.01906 | 0.05816 | 0.04687 |
| 0.132 | 0.01792 | 0.05721 | 0.04572 |
| 0.136 | 0.01673 | 0.05621 | 0.04498 |
| 0.14  | 0.01565 | 0.05523 | 0.04426 |
| 0.144 | 0.01457 | 0.05405 | 0.04374 |
| 0.148 | 0.01343 | 0.05298 | 0.04271 |
| 0.152 | 0.01235 | 0.05189 | 0.04188 |
| 0.156 | 0.01132 | 0.05073 | 0.04064 |
| 0.16  | 0.01019 | 0.04978 | 0.0399  |
| 0.164 | 0.00916 | 0.04852 | 0.03889 |
| 0.168 | 0.00825 | 0.04728 | 0.03783 |
| 0.172 | 0.00745 | 0.04593 | 0.03694 |
| 0.176 | 0.00677 | 0.04463 | 0.03582 |
| 0.18  | 0.00563 | 0.04336 | 0.03464 |
| 0.184 | 0.00512 | 0.04201 | 0.03312 |
| 0.188 | 0.00444 | 0.04063 | 0.0324  |
| 0.192 | 0.00398 | 0.0393  | 0.0314  |
| 0.196 | 0.00341 | 0.03758 | 0.03031 |
| 0.2   | 0.00307 | 0.03631 | 0.02913 |
| 0.204 | 0.0029  | 0.0347  | 0.02827 |
| 0.208 | 0.00239 | 0.03317 | 0.02715 |
| 0.212 | 0.00222 | 0.03153 | 0.02592 |
| 0.216 | 0.00199 | 0.02983 | 0.02471 |
| 0.22  | 0.00188 | 0.02839 | 0.02359 |

#### Water-ABS (Summer)

|       |         |         |         |
|-------|---------|---------|---------|
| 0.004 | 0.05292 | 0.1002  | 0.0800  |
| 0.008 | 0.04998 | 0.09381 | 0.07555 |
| 0.012 | 0.04728 | 0.0889  | 0.07191 |
| 0.016 | 0.04483 | 0.08448 | 0.06851 |
| 0.02  | 0.04287 | 0.08128 | 0.06564 |
| 0.024 | 0.04084 | 0.07809 | 0.06302 |
| 0.028 | 0.03939 | 0.07588 | 0.06067 |
| 0.032 | 0.0378  | 0.07367 | 0.05858 |
| 0.036 | 0.03643 | 0.07195 | 0.05649 |
| 0.04  | 0.03518 | 0.07023 | 0.05492 |
| 0.044 | 0.03395 | 0.06876 | 0.05309 |
| 0.048 | 0.03273 | 0.06753 | 0.05153 |
| 0.052 | 0.03175 | 0.0663  | 0.0497  |
| 0.056 | 0.03062 | 0.06532 | 0.04816 |
| 0.06  | 0.02972 | 0.06458 | 0.04682 |
| 0.064 | 0.02886 | 0.0636  | 0.04552 |
| 0.068 | 0.02788 | 0.06262 | 0.04411 |
| 0.072 | 0.02705 | 0.06188 | 0.04262 |
| 0.076 | 0.02621 | 0.06114 | 0.04131 |
| 0.08  | 0.02536 | 0.0604  | 0.03992 |
| 0.084 | 0.0245  | 0.05942 | 0.03851 |
| 0.088 | 0.02362 | 0.05868 | 0.03713 |
| 0.092 | 0.02286 | 0.05819 | 0.03598 |
| 0.096 | 0.02188 | 0.05721 | 0.03452 |
| 0.1   | 0.02112 | 0.05647 | 0.03329 |
| 0.104 | 0.02031 | 0.05549 | 0.03203 |
| 0.108 | 0.0194  | 0.05475 | 0.03062 |
| 0.112 | 0.01872 | 0.05377 | 0.02929 |
| 0.116 | 0.01788 | 0.05303 | 0.02804 |
| 0.12  | 0.017   | 0.05205 | 0.02668 |
| 0.124 | 0.01632 | 0.05107 | 0.02555 |
| 0.128 | 0.01546 | 0.05009 | 0.02425 |
| 0.132 | 0.01472 | 0.0491  | 0.02302 |
| 0.136 | 0.01401 | 0.04812 | 0.02174 |
| 0.14  | 0.01325 | 0.04689 | 0.02059 |
| 0.144 | 0.01254 | 0.04591 | 0.01923 |
| 0.148 | 0.01171 | 0.04468 | 0.01798 |
| 0.152 | 0.011   | 0.04345 | 0.01668 |
| 0.156 | 0.01046 | 0.04223 | 0.01566 |
| 0.16  | 0.00985 | 0.041   | 0.01471 |
| 0.164 | 0.00924 | 0.03977 | 0.01377 |
| 0.168 | 0.00848 | 0.03854 | 0.01266 |
| 0.172 | 0.00796 | 0.03731 | 0.01171 |
| 0.176 | 0.00745 | 0.03591 | 0.01080 |
| 0.18  | 0.00691 | 0.03449 | 0.00991 |
| 0.184 | 0.00634 | 0.03326 | 0.00900 |
| 0.188 | 0.00598 | 0.03203 | 0.00833 |
| 0.192 | 0.00551 | 0.03029 | 0.00774 |
| 0.196 | 0.00492 | 0.02886 | 0.00666 |
| 0.2   | 0.00439 | 0.02761 | 0.00606 |
| 0.204 | 0.00404 | 0.02606 | 0.00544 |
| 0.208 | 0.0037  | 0.02454 | 0.00477 |
| 0.212 | 0.00309 | 0.02292 | 0.00400 |
| 0.216 | 0.00272 | 0.02144 | 0.00343 |
| 0.22  | 0.00243 | 0.01987 | 0.00291 |



|       |          |          |          |       |          |          |          |          |       |          |          |          |          |
|-------|----------|----------|----------|-------|----------|----------|----------|----------|-------|----------|----------|----------|----------|
| 0.224 | 0.00176  | 0.02663  | 0.02224  | 0.224 | 0.00203  | 0.01837  | 0.00246  | 8.91E-04 | 0.224 | 0.01678  | 0.00662  | 0.00939  | 3.08E-04 |
| 0.228 | 0.00131  | 0.02491  | 0.02101  | 0.228 | 0.00167  | 0.01675  | 0.00191  | 5.09E-04 | 0.228 | 0.01526  | 0.00576  | 0.00877  | 0        |
| 0.232 | 0.00114  | 0.02335  | 0.0198   | 0.232 | 0.00127  | 0.01528  | 0.00146  | 3.18E-04 | 0.232 | 0.01335  | 0.00482  | 0.00845  | 1.15E-04 |
| 0.236 | 9.67E-04 | 0.02165  | 0.01854  | 0.236 | 9.80E-04 | 0.01376  | 0.0011   | 1.27E-04 | 0.236 | 0.01182  | 0.00413  | 0.00814  | 7.69E-05 |
| 0.24  | 7.97E-04 | 0.0199   | 0.01716  | 0.24  | 6.86E-04 | 0.01223  | 6.27E-04 | 0        | 0.24  | 0.00992  | 0.00331  | 0.00751  | 1.54E-04 |
| 0.244 | 5.12E-04 | 0.01823  | 0.01573  | 0.244 | 3.67E-04 | 0.01056  | 5.23E-04 | 1.27E-04 | 0.244 | 0.00839  | 0.00282  | 0.00689  | 5.38E-04 |
| 0.248 | 2.28E-04 | 0.0165   | 0.01452  | 0.248 | 7.35E-05 | 0.00916  | 5.23E-05 | 6.36E-05 | 0.248 | 0.00686  | 0.00204  | 0.00626  | 9.61E-04 |
| 0.252 | 2.28E-04 | 0.01497  | 0.01338  | 0.252 | 7.35E-05 | 0.00776  | 0        | 3.82E-04 | 0.252 | 0.00572  | 0.00151  | 0.00564  | 0.00154  |
| 0.256 | 1.14E-04 | 0.0133   | 0.01205  | 0.256 | 0        | 0.00636  | 0        | 7.00E-04 | 0.256 | 0.0042   | 0.0011   | 0.00501  | 0.00242  |
| 0.26  | 0        | 0.01143  | 0.01062  | 0.26  | 0.00115  | 0.00489  | 2.61E-05 | 0.00121  | 0.26  | 0.00267  | 4.49E-04 | 0.00407  | 0.00346  |
| 0.264 | 5.69E-05 | 0.01014  | 0.0093   | 0.264 | 0.00223  | 0.00359  | 4.18E-04 | 0.00204  | 0.264 | 0.00191  | 3.27E-04 | 0.00376  | 0.005    |
| 0.268 | 2.28E-04 | 0.00852  | 0.00824  | 0.268 | 0.00225  | 0.00258  | 6.01E-04 | 0.00286  | 0.268 | 0.00114  | 1.63E-04 | 0.00282  | 0.0068   |
| 0.272 | 0        | 0.00711  | 0.007    | 0.272 | 0.00108  | 0.00182  | 0.00115  | 0.00407  | 0.272 | 3.81E-04 | 0        | 0.00219  | 0.00896  |
| 0.276 | 0        | 0.00576  | 0.00574  | 0.276 | 0.00164  | 9.09E-04 | 0.00183  | 0.00547  | 0.276 | 0        | 2.86E-04 | 0.00157  | 0.01192  |
| 0.28  | 2.28E-04 | 0.00449  | 0.00479  | 0.28  | 0.00294  | 3.19E-04 | 0.0028   | 0.00726  | 0.28  | 0        | 5.72E-04 | 9.39E-04 | 0.01503  |
| 0.284 | 5.12E-04 | 0.0034   | 0.00373  | 0.284 | 0.00382  | 0        | 0.004    | 0.00929  | 0.284 | 3.81E-04 | 0.00114  | 6.26E-04 | 0.01872  |
| 0.288 | 9.10E-04 | 0.00245  | 0.00273  | 0.288 | 0.00505  | 1.23E-04 | 0.00554  | 0.01197  | 0.288 | 0.00153  | 0.00208  | 3.13E-04 | 0.02314  |
| 0.292 | 0.00131  | 0.00138  | 0.00178  | 0.292 | 0.00691  | 2.46E-04 | 0.00732  | 0.01502  | 0.292 | 0.00229  | 0.00327  | 0        | 0.02841  |
| 0.296 | 0.00165  | 7.77E-04 | 0.00121  | 0.296 | 0.00855  | 0.00103  | 0.00938  | 0.01846  | 0.296 | 0.0042   | 0.00482  | 0        | 0.03441  |
| 0.3   | 0.0025   | 1.73E-04 | 5.45E-04 | 0.3   | 0.01154  | 0.00226  | 0.01189  | 0.02279  | 0.3   | 0.00686  | 0.00686  | 3.13E-04 | 0.04148  |
| 0.304 | 0.00324  | 0        | 5.74E-05 | 0.304 | 0.01453  | 0.00381  | 0.01482  | 0.02756  | 0.304 | 0.00992  | 0.00939  | 9.39E-04 | 0.04948  |
| 0.308 | 0.00421  | 2.88E-05 | 0        | 0.308 | 0.01788  | 0.0059   | 0.01805  | 0.0331   | 0.308 | 0.01411  | 0.01221  | 0.00188  | 0.05878  |
| 0.312 | 0.00541  | 2.30E-04 | 1.72E-04 | 0.312 | 0.02207  | 0.00845  | 0.02192  | 0.03946  | 0.312 | 0.01869  | 0.01585  | 0.00313  | 0.06897  |
| 0.316 | 0.00694  | 8.64E-04 | 7.75E-04 | 0.316 | 0.02692  | 0.01174  | 0.02626  | 0.04652  | 0.316 | 0.02479  | 0.0201   | 0.00532  | 0.08042  |
| 0.32  | 0.00871  | 0.00204  | 0.00152  | 0.32  | 0.03197  | 0.01562  | 0.03125  | 0.05467  | 0.32  | 0.03127  | 0.02492  | 0.00783  | 0.09299  |
| 0.324 | 0.01058  | 0.00343  | 0.00247  | 0.324 | 0.03854  | 0.02007  | 0.03682  | 0.06365  | 0.324 | 0.03928  | 0.03023  | 0.01064  | 0.10672  |
| 0.328 | 0.01292  | 0.00544  | 0.00385  | 0.328 | 0.04483  | 0.02518  | 0.04293  | 0.07351  | 0.328 | 0.04805  | 0.03656  | 0.01472  | 0.12152  |
| 0.332 | 0.01536  | 0.00795  | 0.00586  | 0.332 | 0.05218  | 0.03115  | 0.04996  | 0.08439  | 0.332 | 0.05797  | 0.0433   | 0.01941  | 0.13762  |
| 0.336 | 0.01827  | 0.01117  | 0.00798  | 0.336 | 0.06051  | 0.03756  | 0.05727  | 0.09617  | 0.336 | 0.06903  | 0.05085  | 0.02505  | 0.15469  |
| 0.34  | 0.0214   | 0.01538  | 0.01065  | 0.34  | 0.07031  | 0.04468  | 0.0659   | 0.10909  | 0.34  | 0.08124  | 0.05886  | 0.03131  | 0.17272  |
| 0.344 | 0.02464  | 0.02047  | 0.01412  | 0.344 | 0.08011  | 0.0523   | 0.07504  | 0.12322  | 0.344 | 0.09497  | 0.06776  | 0.03882  | 0.19156  |
| 0.348 | 0.02862  | 0.02678  | 0.01825  | 0.348 | 0.09138  | 0.0609   | 0.08549  | 0.13868  | 0.348 | 0.11022  | 0.07732  | 0.04728  | 0.2127   |
| 0.352 | 0.03312  | 0.03444  | 0.02354  | 0.352 | 0.1051   | 0.07023  | 0.09725  | 0.15574  | 0.352 | 0.12662  | 0.08762  | 0.05698  | 0.23231  |
| 0.356 | 0.03801  | 0.04391  | 0.02994  | 0.356 | 0.11857  | 0.08055  | 0.11005  | 0.17426  | 0.356 | 0.14455  | 0.0986   | 0.06731  | 0.25383  |
| 0.36  | 0.0437   | 0.0554   | 0.03794  | 0.36  | 0.13621  | 0.09209  | 0.12495  | 0.19456  | 0.36  | 0.16476  | 0.11069  | 0.0789   | 0.27652  |
| 0.364 | 0.05081  | 0.06985  | 0.04785  | 0.364 | 0.1563   | 0.10511  | 0.14193  | 0.21773  | 0.364 | 0.18841  | 0.12421  | 0.09236  | 0.30112  |
| 0.368 | 0.05838  | 0.08667  | 0.06002  | 0.368 | 0.18006  | 0.1201   | 0.16074  | 0.24319  | 0.368 | 0.21358  | 0.13867  | 0.10645  | 0.32649  |
| 0.372 | 0.06749  | 0.10711  | 0.07408  | 0.372 | 0.20799  | 0.1368   | 0.18217  | 0.27126  | 0.372 | 0.24218  | 0.15477  | 0.12116  | 0.35378  |
| 0.376 | 0.07813  | 0.1313   | 0.09159  | 0.376 | 0.24106  | 0.15694  | 0.20621  | 0.30327  | 0.376 | 0.27498  | 0.17274  | 0.13713  | 0.38377  |
| 0.38  | 0.09093  | 0.15952  | 0.11197  | 0.38  | 0.2805   | 0.18028  | 0.23338  | 0.3391   | 0.38  | 0.31159  | 0.19316  | 0.15435  | 0.41645  |
| 0.384 | 0.10567  | 0.19205  | 0.13608  | 0.384 | 0.32558  | 0.20755  | 0.26343  | 0.37825  | 0.384 | 0.35355  | 0.21604  | 0.17314  | 0.45181  |
| 0.388 | 0.12274  | 0.22862  | 0.16392  | 0.388 | 0.37776  | 0.23874  | 0.29583  | 0.42076  | 0.388 | 0.40008  | 0.24148  | 0.19317  | 0.49064  |
| 0.392 | 0.14243  | 0.26922  | 0.19578  | 0.392 | 0.43435  | 0.27461  | 0.33084  | 0.4669   | 0.392 | 0.45118  | 0.27008  | 0.21572  | 0.53293  |
| 0.396 | 0.16416  | 0.3127   | 0.23079  | 0.396 | 0.49804  | 0.31416  | 0.36664  | 0.51502  | 0.396 | 0.50763  | 0.30112  | 0.24014  | 0.57829  |
| 0.4   | 0.18812  | 0.35819  | 0.26868  | 0.4   | 0.56614  | 0.3569   | 0.40348  | 0.56466  | 0.4   | 0.56827  | 0.3342   | 0.26738  | 0.62673  |
| 0.404 | 0.21344  | 0.40426  | 0.30857  | 0.404 | 0.62959  | 0.4021   | 0.43954  | 0.61303  | 0.404 | 0.6312   | 0.36933  | 0.29806  | 0.6767   |
| 0.408 | 0.23944  | 0.44976  | 0.3499   | 0.408 | 0.69353  | 0.44828  | 0.47324  | 0.65886  | 0.408 | 0.69603  | 0.40446  | 0.33281  | 0.72706  |
| 0.412 | 0.26499  | 0.49237  | 0.39095  | 0.412 | 0.75233  | 0.49299  | 0.50303  | 0.69959  | 0.412 | 0.76011  | 0.43959  | 0.37226  | 0.77703  |
| 0.416 | 0.28929  | 0.53038  | 0.43056  | 0.416 | 0.80304  | 0.53499  | 0.52785  | 0.73332  | 0.416 | 0.82189  | 0.47227  | 0.41578  | 0.82432  |
| 0.42  | 0.31034  | 0.56176  | 0.46615  | 0.42  | 0.84199  | 0.57184  | 0.54588  | 0.75878  | 0.42  | 0.87719  | 0.50167  | 0.46493  | 0.86776  |
| 0.424 | 0.32798  | 0.58508  | 0.49743  | 0.424 | 0.86796  | 0.60181  | 0.55659  | 0.77342  | 0.424 | 0.92525  | 0.52659  | 0.51879  | 0.90543  |
| 0.428 | 0.34107  | 0.59948  | 0.52154  | 0.428 | 0.87825  | 0.62367  | 0.55921  | 0.77788  | 0.428 | 0.96262  | 0.54538  | 0.57733  | 0.93657  |
| 0.432 | 0.34847  | 0.60351  | 0.53819  | 0.432 | 0.87261  | 0.63522  | 0.55372  | 0.77151  | 0.432 | 0.98856  | 0.55723  | 0.63932  | 0.95925  |
| 0.436 | 0.35075  | 0.59747  | 0.5468   | 0.436 | 0.85105  | 0.63595  | 0.5404   | 0.75496  | 0.436 | 1        | 0.56172  | 0.70288  | 0.97194  |
| 0.44  | 0.34733  | 0.58192  | 0.54594  | 0.44  | 0.81529  | 0.62711  | 0.52028  | 0.73014  | 0.44  | 0.99657  | 0.55804  | 0.76612  | 0.97501  |
| 0.444 | 0.33993  | 0.55831  | 0.53704  | 0.444 | 0.7685   | 0.60819  | 0.49519  | 0.69896  | 0.444 | 0.98093  | 0.54783  | 0.82718  | 0.96848  |
| 0.448 | 0.32855  | 0.5275   | 0.52011  | 0.448 | 0.71313  | 0.58093  | 0.46567  | 0.66268  | 0.448 | 0.95118  | 0.53149  | 0.88291  | 0.9531   |
| 0.452 | 0.31433  | 0.49122  | 0.49628  | 0.452 | 0.65238  | 0.54703  | 0.43379  | 0.62449  | 0.452 | 0.90999  | 0.50903  | 0.92987  | 0.92965  |
| 0.456 | 0.2984   | 0.45206  | 0.46729  | 0.456 | 0.58966  | 0.50895  | 0.40087  | 0.5863   | 0.456 | 0.86156  | 0.48329  | 0.9665   | 0.89967  |
| 0.46  | 0.28132  | 0.41146  | 0.43486  | 0.46  | 0.52768  | 0.46769  | 0.36795  | 0.54939  | 0.46  | 0.80625  | 0.45511  | 0.99061  | 0.86507  |
| 0.464 | 0.26414  | 0.37115  | 0.40013  | 0.464 | 0.46815  | 0.42543  | 0.33633  | 0.51566  | 0.464 | 0.74828  | 0.42529  | 1        | 0.82778  |
| 0.468 | 0.2469   | 0.33228  | 0.36483  | 0.468 | 0.41279  | 0.38367  | 0.30654  | 0.48479  | 0.468 | 0.69069  | 0.39547  | 0.99468  | 0.78895  |
| 0.472 | 0.22989  | 0.29542  | 0.32953  | 0.472 | 0.36232  | 0.34388  | 0.27911  | 0.45806  | 0.472 | 0.63463  | 0.36606  | 0.97464  | 0.75051  |
| 0.476 | 0.2135   | 0.26145  | 0.29566  | 0.476 | 0.317    | 0.3063   | 0.25429  | 0.43534  | 0.476 | 0.58124  | 0.33829  | 0.94145  | 0.71284  |
| 0.48  | 0.19791  | 0.23092  | 0.26351  | 0.48  | 0.27732  | 0.27166  | 0.23208  | 0.41662  | 0.48  | 0.53242  | 0.31256  | 0.89699  | 0.67785  |
| 0.484 | 0.18266  | 0.20328  | 0.23366  | 0.484 | 0.24253  | 0.24022  | 0.21222  | 0.40116  | 0.484 | 0.48818  | 0.28846  | 0.84346  | 0.64518  |
| 0.488 | 0.16815  | 0.17881  | 0.20639  | 0.488 | 0.21264  | 0.21197  | 0.19471  | 0.38856  | 0.488 | 0.44889  | 0.26722  | 0.7846   | 0.61596  |
| 0.492 | 0.15415  | 0.15721  | 0.18171  | 0.492 | 0.18716  | 0.18716  | 0.17956  | 0.37856  | 0.492 | 0.41495  | 0.24843  | 0.72323  | 0.5902   |
| 0.496 | 0.14066  | 0.13792  | 0.15932  | 0.496 | 0.16585  | 0.16505  | 0.16597  | 0.37042  | 0.496 | 0.3852   | 0.23168  | 0.66187  | 0.56752  |
| 0.5   | 0.1278   | 0.12122  | 0.13923  | 0.5   | 0.14748  | 0.14564  | 0.15395  | 0.36424  | 0.5   | 0.35965  | 0.21702  | 0.60238  | 0.54753  |
| 0.504 | 0.11545  | 0.10682  | 0.12172  | 0.504 | 0.13229  | 0.12869  | 0.1435   | 0.35928  | 0.504 | 0.33791  | 0.20407  | 0.54634  | 0.53062  |
| 0.508 | 0.10413  | 0.09415  | 0.10651  | 0.508 | 0.11955  | 0.11445  | 0.13462  | 0.35603  | 0.508 | 0.31922  | 0.19312  | 0.4953   | 0.51678  |
| 0.512 | 0.09326  | 0.0835   | 0.09274  | 0.512 | 0.10877  | 0.10192  | 0.12678  | 0.35349  | 0.512 | 0.30397  | 0.18389  | 0.44959  | 0.50525  |
| 0.516 | 0.08291  | 0.07377  | 0.08097  | 0.516 | 0.1002   | 0.09111  | 0.11998  | 0.35171  | 0.516 | 0.291    | 0.1758   | 0.40889  | 0.49564  |
| 0.52  | 0.0738   | 0.06582  | 0.07092  | 0.52  | 0.09309  | 0.08251  | 0.11423  | 0.35126  | 0.52  | 0.28032  | 0.16947  | 0.37351  | 0.48872  |
| 0.524 | 0.06527  | 0.05906  | 0.06202  | 0.524 | 0.0877   | 0.0749   |          |          |       |          |          |          |          |

|       |         |         |         |       |         |         |         |         |       |         |         |         |         |
|-------|---------|---------|---------|-------|---------|---------|---------|---------|-------|---------|---------|---------|---------|
| 0.636 | 0.03619 | 0.1051  | 0.06604 | 0.636 | 0.14821 | 0.09971 | 0.15082 | 0.48988 | 0.636 | 0.36651 | 0.21992 | 0.23388 | 0.64825 |
| 0.64  | 0.03767 | 0.11172 | 0.07092 | 0.64  | 0.1536  | 0.10437 | 0.15656 | 0.49726 | 0.64  | 0.3749  | 0.22576 | 0.23732 | 0.65594 |
| 0.644 | 0.03903 | 0.11777 | 0.0758  | 0.644 | 0.1585  | 0.10855 | 0.16257 | 0.50446 | 0.644 | 0.3833  | 0.23131 | 0.24108 | 0.66325 |
| 0.648 | 0.04091 | 0.12381 | 0.08039 | 0.648 | 0.16389 | 0.11322 | 0.16858 | 0.5119  | 0.648 | 0.39207 | 0.2374  | 0.24483 | 0.67055 |
| 0.652 | 0.04222 | 0.12957 | 0.08499 | 0.652 | 0.17099 | 0.11764 | 0.17433 | 0.51884 | 0.652 | 0.40084 | 0.24393 | 0.24922 | 0.67747 |
| 0.656 | 0.04325 | 0.13504 | 0.08958 | 0.656 | 0.17173 | 0.12182 | 0.18034 | 0.52584 | 0.656 | 0.40923 | 0.25006 | 0.25329 | 0.68439 |
| 0.66  | 0.04478 | 0.13994 | 0.09331 | 0.66  | 0.1754  | 0.12599 | 0.18557 | 0.5322  | 0.66  | 0.41724 | 0.25619 | 0.25798 | 0.69015 |
| 0.664 | 0.04638 | 0.14426 | 0.09733 | 0.664 | 0.17859 | 0.12992 | 0.19079 | 0.53857 | 0.664 | 0.42563 | 0.26191 | 0.26268 | 0.69592 |
| 0.668 | 0.04831 | 0.148   | 0.10049 | 0.668 | 0.18128 | 0.13361 | 0.19576 | 0.5443  | 0.668 | 0.43326 | 0.26763 | 0.26769 | 0.7013  |
| 0.672 | 0.05059 | 0.15117 | 0.10336 | 0.672 | 0.18349 | 0.13729 | 0.2002  | 0.55003 | 0.672 | 0.44088 | 0.27334 | 0.27301 | 0.70707 |
| 0.676 | 0.05263 | 0.15347 | 0.10565 | 0.676 | 0.1852  | 0.14024 | 0.20386 | 0.55448 | 0.676 | 0.44737 | 0.27784 | 0.27802 | 0.71091 |
| 0.68  | 0.05514 | 0.1552  | 0.10795 | 0.68  | 0.18594 | 0.14319 | 0.20725 | 0.55894 | 0.68  | 0.45271 | 0.28274 | 0.28334 | 0.71476 |
| 0.684 | 0.05804 | 0.15664 | 0.10938 | 0.684 | 0.18716 | 0.14613 | 0.21013 | 0.56275 | 0.684 | 0.45767 | 0.28682 | 0.28898 | 0.71783 |
| 0.688 | 0.06134 | 0.1575  | 0.11053 | 0.688 | 0.1879  | 0.14908 | 0.21248 | 0.56594 | 0.688 | 0.46186 | 0.29009 | 0.29399 | 0.71976 |
| 0.692 | 0.06487 | 0.15808 | 0.11168 | 0.692 | 0.18839 | 0.15203 | 0.21457 | 0.56848 | 0.692 | 0.46529 | 0.29295 | 0.299   | 0.72129 |
| 0.696 | 0.06879 | 0.15808 | 0.11283 | 0.696 | 0.18912 | 0.15522 | 0.21614 | 0.57103 | 0.696 | 0.46758 | 0.2954  | 0.30369 | 0.72245 |
| 0.7   | 0.0734  | 0.15865 | 0.11369 | 0.7   | 0.18986 | 0.15891 | 0.21797 | 0.57294 | 0.7   | 0.46949 | 0.29703 | 0.3087  | 0.72283 |
| 0.704 | 0.0787  | 0.15894 | 0.11484 | 0.704 | 0.1901  | 0.16259 | 0.21953 | 0.57421 | 0.704 | 0.47025 | 0.29908 | 0.31246 | 0.72283 |
| 0.708 | 0.08444 | 0.15923 | 0.11627 | 0.708 | 0.19206 | 0.16677 | 0.2211  | 0.57548 | 0.708 | 0.47063 | 0.29989 | 0.31622 | 0.72129 |
| 0.712 | 0.09093 | 0.16009 | 0.11828 | 0.712 | 0.19402 | 0.17193 | 0.22293 | 0.57676 | 0.712 | 0.47025 | 0.30153 | 0.31935 | 0.72052 |
| 0.716 | 0.09827 | 0.16153 | 0.12058 | 0.716 | 0.19647 | 0.17782 | 0.22476 | 0.57803 | 0.716 | 0.46987 | 0.30234 | 0.32185 | 0.7186  |
| 0.72  | 0.10646 | 0.16326 | 0.12345 | 0.72  | 0.19966 | 0.18421 | 0.22711 | 0.57867 | 0.72  | 0.46873 | 0.30357 | 0.32373 | 0.71668 |
| 0.724 | 0.11511 | 0.16585 | 0.12689 | 0.724 | 0.20333 | 0.19133 | 0.22946 | 0.57994 | 0.724 | 0.46758 | 0.3048  | 0.32467 | 0.71399 |
| 0.728 | 0.12473 | 0.16902 | 0.1312  | 0.728 | 0.20799 | 0.19944 | 0.23234 | 0.58121 | 0.728 | 0.46644 | 0.30602 | 0.3253  | 0.71168 |
| 0.732 | 0.13492 | 0.17276 | 0.13636 | 0.732 | 0.21338 | 0.20853 | 0.23599 | 0.58248 | 0.732 | 0.46568 | 0.30806 | 0.32561 | 0.70899 |
| 0.736 | 0.14618 | 0.17766 | 0.14239 | 0.736 | 0.21975 | 0.21835 | 0.24044 | 0.58439 | 0.736 | 0.46491 | 0.31011 | 0.32561 | 0.70669 |
| 0.74  | 0.15768 | 0.18341 | 0.14899 | 0.74  | 0.22636 | 0.22892 | 0.24488 | 0.58567 | 0.74  | 0.46453 | 0.31256 | 0.32467 | 0.70399 |
| 0.744 | 0.17014 | 0.19004 | 0.15703 | 0.744 | 0.2342  | 0.24022 | 0.25037 | 0.58758 | 0.744 | 0.46453 | 0.31582 | 0.32405 | 0.70207 |
| 0.748 | 0.18283 | 0.19752 | 0.16564 | 0.748 | 0.24277 | 0.2525  | 0.25638 | 0.59012 | 0.748 | 0.46453 | 0.3195  | 0.32342 | 0.70053 |
| 0.752 | 0.1958  | 0.20616 | 0.1754  | 0.752 | 0.25208 | 0.26527 | 0.26265 | 0.59267 | 0.752 | 0.46568 | 0.32358 | 0.32217 | 0.699   |
| 0.756 | 0.20934 | 0.21509 | 0.18573 | 0.756 | 0.26164 | 0.27854 | 0.26944 | 0.59521 | 0.756 | 0.46644 | 0.32808 | 0.32154 | 0.69784 |
| 0.76  | 0.223   | 0.22517 | 0.19721 | 0.76  | 0.27217 | 0.29254 | 0.27702 | 0.59776 | 0.76  | 0.46834 | 0.33339 | 0.32091 | 0.69707 |
| 0.764 | 0.23688 | 0.2364  | 0.20955 | 0.764 | 0.28319 | 0.30728 | 0.28486 | 0.60094 | 0.764 | 0.47063 | 0.33951 | 0.3206  | 0.69707 |
| 0.768 | 0.25088 | 0.24791 | 0.22275 | 0.768 | 0.29446 | 0.32177 | 0.29269 | 0.60412 | 0.768 | 0.47368 | 0.34564 | 0.3206  | 0.69784 |
| 0.772 | 0.26494 | 0.26001 | 0.23624 | 0.772 | 0.30598 | 0.33626 | 0.30106 | 0.60667 | 0.772 | 0.47597 | 0.35259 | 0.32029 | 0.69823 |
| 0.776 | 0.27962 | 0.27354 | 0.25146 | 0.776 | 0.31823 | 0.35149 | 0.3102  | 0.61113 | 0.776 | 0.48131 | 0.36035 | 0.32185 | 0.70092 |
| 0.78  | 0.29384 | 0.28678 | 0.26638 | 0.78  | 0.33023 | 0.36599 | 0.31908 | 0.61494 | 0.78  | 0.48589 | 0.36852 | 0.32279 | 0.70284 |
| 0.784 | 0.30693 | 0.30003 | 0.28131 | 0.784 | 0.3415  | 0.37999 | 0.32797 | 0.61876 | 0.784 | 0.4897  | 0.37668 | 0.32405 | 0.70553 |
| 0.788 | 0.32116 | 0.31385 | 0.29652 | 0.788 | 0.35277 | 0.39325 | 0.33659 | 0.62195 | 0.788 | 0.49504 | 0.38567 | 0.32561 | 0.70784 |
| 0.792 | 0.33538 | 0.32796 | 0.31144 | 0.792 | 0.36379 | 0.40603 | 0.34521 | 0.62513 | 0.792 | 0.50038 | 0.39466 | 0.32749 | 0.7113  |
| 0.796 | 0.34961 | 0.34178 | 0.32637 | 0.796 | 0.37433 | 0.41757 | 0.35357 | 0.62895 | 0.796 | 0.50572 | 0.40405 | 0.32968 | 0.71476 |
| 0.8   | 0.36383 | 0.3556  | 0.34043 | 0.8   | 0.38437 | 0.42863 | 0.36194 | 0.63213 | 0.8   | 0.51144 | 0.41386 | 0.3325  | 0.71899 |
| 0.804 | 0.37749 | 0.36856 | 0.35392 | 0.804 | 0.39319 | 0.43796 | 0.36951 | 0.63531 | 0.804 | 0.51678 | 0.42366 | 0.33532 | 0.72245 |
| 0.808 | 0.39115 | 0.38123 | 0.36684 | 0.808 | 0.40176 | 0.44656 | 0.37709 | 0.63786 | 0.808 | 0.52365 | 0.43387 | 0.33876 | 0.72629 |
| 0.812 | 0.40423 | 0.39361 | 0.37861 | 0.812 | 0.40936 | 0.45368 | 0.38441 | 0.64104 | 0.812 | 0.52937 | 0.44408 | 0.3422  | 0.7309  |
| 0.816 | 0.41732 | 0.40541 | 0.38923 | 0.816 | 0.41597 | 0.45982 | 0.39094 | 0.64358 | 0.816 | 0.53547 | 0.4547  | 0.34596 | 0.73475 |
| 0.82  | 0.4287  | 0.41635 | 0.39812 | 0.82  | 0.42185 | 0.46425 | 0.39721 | 0.64549 | 0.82  | 0.54081 | 0.4645  | 0.34941 | 0.73859 |
| 0.824 | 0.44008 | 0.42614 | 0.40616 | 0.824 | 0.42626 | 0.46744 | 0.4027  | 0.6474  | 0.824 | 0.54615 | 0.4739  | 0.35254 | 0.74205 |
| 0.828 | 0.45089 | 0.43565 | 0.41305 | 0.828 | 0.43092 | 0.46965 | 0.40844 | 0.64995 | 0.828 | 0.55187 | 0.4837  | 0.35661 | 0.7459  |
| 0.832 | 0.4617  | 0.44428 | 0.41879 | 0.832 | 0.43435 | 0.47088 | 0.41367 | 0.65122 | 0.832 | 0.55721 | 0.49269 | 0.36068 | 0.74974 |
| 0.836 | 0.47081 | 0.45148 | 0.42281 | 0.836 | 0.43704 | 0.47088 | 0.41811 | 0.65249 | 0.836 | 0.56217 | 0.50127 | 0.36475 | 0.75282 |
| 0.84  | 0.47991 | 0.45839 | 0.42625 | 0.84  | 0.439   | 0.47014 | 0.42255 | 0.65377 | 0.84  | 0.56751 | 0.50984 | 0.36882 | 0.75628 |
| 0.844 | 0.48845 | 0.46415 | 0.42797 | 0.844 | 0.43998 | 0.46818 | 0.42673 | 0.65504 | 0.844 | 0.57208 | 0.5176  | 0.37289 | 0.75935 |
| 0.848 | 0.49642 | 0.46876 | 0.42883 | 0.848 | 0.44096 | 0.46572 | 0.43013 | 0.65568 | 0.848 | 0.57628 | 0.52455 | 0.37696 | 0.76204 |
| 0.852 | 0.50324 | 0.4725  | 0.42855 | 0.852 | 0.44096 | 0.46228 | 0.43353 | 0.65568 | 0.852 | 0.58047 | 0.53108 | 0.3804  | 0.76473 |
| 0.856 | 0.5095  | 0.47538 | 0.42769 | 0.856 | 0.44072 | 0.45835 | 0.4364  | 0.65631 | 0.856 | 0.58352 | 0.5368  | 0.38384 | 0.76666 |
| 0.86  | 0.51576 | 0.47768 | 0.42625 | 0.86  | 0.44023 | 0.45442 | 0.43928 | 0.65631 | 0.86  | 0.58658 | 0.54211 | 0.3876  | 0.76896 |
| 0.864 | 0.52088 | 0.47941 | 0.42395 | 0.864 | 0.43974 | 0.44975 | 0.44163 | 0.65631 | 0.864 | 0.58963 | 0.5462  | 0.39073 | 0.77088 |
| 0.868 | 0.52544 | 0.48028 | 0.4208  | 0.868 | 0.43851 | 0.44484 | 0.44346 | 0.65631 | 0.868 | 0.59153 | 0.54987 | 0.39355 | 0.77242 |
| 0.872 | 0.52942 | 0.48085 | 0.41764 | 0.872 | 0.43778 | 0.44042 | 0.44529 | 0.65568 | 0.872 | 0.5942  | 0.55273 | 0.39668 | 0.77396 |
| 0.876 | 0.5334  | 0.48114 | 0.41477 | 0.876 | 0.43729 | 0.436   | 0.44712 | 0.65568 | 0.876 | 0.59611 | 0.55559 | 0.3995  | 0.77588 |
| 0.88  | 0.53625 | 0.48085 | 0.41104 | 0.88  | 0.43631 | 0.43133 | 0.44842 | 0.65504 | 0.88  | 0.59764 | 0.55723 | 0.402   | 0.77665 |
| 0.884 | 0.53852 | 0.48028 | 0.40759 | 0.884 | 0.43557 | 0.42666 | 0.44947 | 0.65377 | 0.884 | 0.5984  | 0.55845 | 0.4042  | 0.77742 |
| 0.888 | 0.54023 | 0.47912 | 0.40415 | 0.888 | 0.43484 | 0.422   | 0.45025 | 0.65249 | 0.888 | 0.59916 | 0.55886 | 0.40639 | 0.77857 |
| 0.892 | 0.54194 | 0.47855 | 0.40099 | 0.892 | 0.43484 | 0.41856 | 0.45103 | 0.65186 | 0.892 | 0.59992 | 0.55927 | 0.40827 | 0.77896 |
| 0.896 | 0.54307 | 0.47768 | 0.39812 | 0.896 | 0.43484 | 0.41512 | 0.45208 | 0.65059 | 0.896 | 0.60031 | 0.55968 | 0.41014 | 0.77973 |
| 0.9   | 0.54364 | 0.47682 | 0.39554 | 0.9   | 0.43508 | 0.41217 | 0.45234 | 0.64931 | 0.9   | 0.60031 | 0.55927 | 0.4114  | 0.77934 |
| 0.904 | 0.54364 | 0.47625 | 0.39324 | 0.904 | 0.43582 | 0.40947 | 0.45313 | 0.64868 | 0.904 | 0.60069 | 0.55886 | 0.41296 | 0.77973 |
| 0.908 | 0.54364 | 0.47596 | 0.39181 | 0.908 | 0.43704 | 0.40775 | 0.45391 | 0.6474  | 0.908 | 0.60107 | 0.55845 | 0.41421 | 0.78011 |
| 0.912 | 0.54364 | 0.47567 | 0.39066 | 0.912 | 0.43827 | 0.40603 | 0.45469 | 0.64677 | 0.912 | 0.60107 | 0.55804 | 0.41515 | 0.78011 |
| 0.916 | 0.54307 | 0.47567 | 0.39009 | 0.916 | 0.44023 | 0.40529 | 0.45548 | 0.64549 | 0.916 | 0.60107 | 0.55763 | 0.41641 | 0.77973 |
| 0.92  | 0.54251 | 0.47625 | 0.3898  | 0.92  | 0.44243 | 0.40529 | 0.456   | 0.64486 | 0.92  | 0.60107 | 0.55682 | 0.41766 | 0.77934 |
| 0.924 | 0.54194 | 0.47711 | 0.39037 | 0.924 | 0.44512 | 0.40578 | 0.45704 | 0.64422 | 0.924 | 0.60145 | 0.55641 | 0.41828 | 0.77896 |
| 0.928 | 0.5408  | 0.47826 | 0.39123 | 0.928 | 0.44806 | 0.40652 | 0.45809 | 0.64358 | 0.928 | 0.60221 | 0.55641 | 0.41954 | 0.77896 |
| 0.932 | 0.53966 | 0.47941 | 0.39238 | 0.932 | 0.451   | 0.40775 | 0.45887 | 0.64295 | 0.932 | 0.60221 | 0.55559 | 0.42048 | 0.7778  |
| 0.936 | 0.53852 | 0.48114 | 0.39439 | 0.    |         |         |         |         |       |         |         |         |         |

|       |         |         |         |       |         |         |         |         |       |         |         |         |         |
|-------|---------|---------|---------|-------|---------|---------|---------|---------|-------|---------|---------|---------|---------|
| 1.048 | 0.59599 | 0.63259 | 0.60162 | 1.048 | 0.66512 | 0.61458 | 0.5822  | 0.73014 | 1.048 | 0.67925 | 0.63974 | 0.53914 | 0.8124  |
| 1.052 | 0.60055 | 0.63807 | 0.60966 | 1.052 | 0.67222 | 0.62244 | 0.58743 | 0.7346  | 1.052 | 0.68345 | 0.64464 | 0.54665 | 0.81317 |
| 1.056 | 0.6051  | 0.64325 | 0.6174  | 1.056 | 0.67883 | 0.6303  | 0.59265 | 0.73905 | 1.056 | 0.68612 | 0.64954 | 0.55416 | 0.81432 |
| 1.06  | 0.60965 | 0.64757 | 0.62401 | 1.06  | 0.68447 | 0.63718 | 0.59736 | 0.74287 | 1.06  | 0.68879 | 0.65403 | 0.56074 | 0.81471 |
| 1.064 | 0.6142  | 0.65189 | 0.63061 | 1.064 | 0.6901  | 0.64406 | 0.60206 | 0.74669 | 1.064 | 0.69146 | 0.65893 | 0.56794 | 0.81548 |
| 1.068 | 0.61932 | 0.65621 | 0.63663 | 1.068 | 0.69451 | 0.65045 | 0.6065  | 0.75115 | 1.068 | 0.69413 | 0.66302 | 0.57483 | 0.81548 |
| 1.072 | 0.62331 | 0.65995 | 0.64209 | 1.072 | 0.69868 | 0.65634 | 0.61068 | 0.75496 | 1.072 | 0.69603 | 0.6671  | 0.58109 | 0.81548 |
| 1.076 | 0.62843 | 0.6634  | 0.64668 | 1.076 | 0.70186 | 0.66224 | 0.6146  | 0.75878 | 1.076 | 0.69832 | 0.67078 | 0.58704 | 0.81509 |
| 1.08  | 0.63298 | 0.66657 | 0.65099 | 1.08  | 0.7048  | 0.66764 | 0.61826 | 0.76197 | 1.08  | 0.69947 | 0.67445 | 0.59267 | 0.81471 |
| 1.084 | 0.6381  | 0.67003 | 0.65529 | 1.084 | 0.70774 | 0.67305 | 0.62218 | 0.76578 | 1.084 | 0.70175 | 0.67854 | 0.59894 | 0.81471 |
| 1.088 | 0.64265 | 0.67319 | 0.65874 | 1.088 | 0.70946 | 0.67796 | 0.62557 | 0.76897 | 1.088 | 0.70328 | 0.68181 | 0.60394 | 0.81394 |
| 1.092 | 0.64664 | 0.6755  | 0.66161 | 1.092 | 0.71093 | 0.68213 | 0.62845 | 0.77215 | 1.092 | 0.70404 | 0.68426 | 0.60802 | 0.81317 |
| 1.096 | 0.65119 | 0.67838 | 0.66476 | 1.096 | 0.7124  | 0.6868  | 0.63158 | 0.77533 | 1.096 | 0.70481 | 0.68712 | 0.61271 | 0.8124  |
| 1.1   | 0.65517 | 0.68068 | 0.66735 | 1.1   | 0.71362 | 0.69098 | 0.63472 | 0.77915 | 1.1   | 0.70595 | 0.68998 | 0.61647 | 0.81163 |
| 1.104 | 0.65972 | 0.68298 | 0.66993 | 1.104 | 0.7146  | 0.69515 | 0.63786 | 0.7817  | 1.104 | 0.70671 | 0.69243 | 0.61991 | 0.81125 |
| 1.108 | 0.66428 | 0.68557 | 0.67223 | 1.108 | 0.71558 | 0.69908 | 0.64047 | 0.78488 | 1.108 | 0.70671 | 0.69488 | 0.62304 | 0.81048 |
| 1.112 | 0.66883 | 0.68788 | 0.67423 | 1.112 | 0.71656 | 0.70277 | 0.64334 | 0.78806 | 1.112 | 0.70709 | 0.69733 | 0.62523 | 0.81009 |
| 1.116 | 0.67338 | 0.69076 | 0.67653 | 1.116 | 0.71779 | 0.70694 | 0.64648 | 0.79124 | 1.116 | 0.70824 | 0.69978 | 0.62774 | 0.80971 |
| 1.12  | 0.6785  | 0.69392 | 0.67911 | 1.12  | 0.71926 | 0.71112 | 0.64961 | 0.79442 | 1.12  | 0.70862 | 0.70223 | 0.63024 | 0.81009 |
| 1.124 | 0.68249 | 0.69652 | 0.68141 | 1.124 | 0.71999 | 0.71456 | 0.65249 | 0.79697 | 1.124 | 0.70786 | 0.70468 | 0.63181 | 0.80933 |
| 1.128 | 0.68761 | 0.69968 | 0.68399 | 1.128 | 0.72195 | 0.71874 | 0.65588 | 0.80079 | 1.128 | 0.709   | 0.70713 | 0.63338 | 0.80971 |
| 1.132 | 0.69273 | 0.70314 | 0.68715 | 1.132 | 0.72391 | 0.72291 | 0.65928 | 0.80334 | 1.132 | 0.70976 | 0.70999 | 0.63463 | 0.81009 |
| 1.136 | 0.69785 | 0.70659 | 0.69031 | 1.136 | 0.72611 | 0.72684 | 0.66268 | 0.80652 | 1.136 | 0.71053 | 0.71285 | 0.63619 | 0.81048 |
| 1.14  | 0.70297 | 0.71034 | 0.69346 | 1.14  | 0.72856 | 0.73126 | 0.6666  | 0.8097  | 1.14  | 0.71091 | 0.7153  | 0.63713 | 0.81125 |
| 1.144 | 0.70809 | 0.71466 | 0.6972  | 1.144 | 0.73126 | 0.73568 | 0.67026 | 0.81352 | 1.144 | 0.71167 | 0.71857 | 0.63838 | 0.8124  |
| 1.148 | 0.71378 | 0.71926 | 0.70121 | 1.148 | 0.73469 | 0.7406  | 0.6747  | 0.81734 | 1.148 | 0.7132  | 0.72184 | 0.63964 | 0.81355 |
| 1.152 | 0.71947 | 0.72387 | 0.70581 | 1.152 | 0.73836 | 0.74551 | 0.67914 | 0.82116 | 1.152 | 0.7151  | 0.7251  | 0.6412  | 0.81509 |
| 1.156 | 0.72459 | 0.72876 | 0.71011 | 1.156 | 0.74204 | 0.75018 | 0.68358 | 0.82434 | 1.156 | 0.71625 | 0.72837 | 0.64214 | 0.81625 |
| 1.16  | 0.73028 | 0.73424 | 0.71499 | 1.16  | 0.7462  | 0.75558 | 0.68828 | 0.82816 | 1.16  | 0.71854 | 0.73246 | 0.64371 | 0.81817 |
| 1.164 | 0.73597 | 0.73999 | 0.72044 | 1.164 | 0.75086 | 0.76074 | 0.69351 | 0.83198 | 1.164 | 0.72006 | 0.73695 | 0.64527 | 0.82047 |
| 1.168 | 0.74223 | 0.74604 | 0.72561 | 1.168 | 0.75551 | 0.7659  | 0.69874 | 0.83579 | 1.168 | 0.72235 | 0.74103 | 0.64715 | 0.82317 |
| 1.172 | 0.74792 | 0.75238 | 0.73135 | 1.172 | 0.76041 | 0.7713  | 0.70396 | 0.83961 | 1.172 | 0.72387 | 0.74553 | 0.6484  | 0.82547 |
| 1.176 | 0.75361 | 0.75871 | 0.73738 | 1.176 | 0.76556 | 0.77695 | 0.70945 | 0.84343 | 1.176 | 0.72578 | 0.75002 | 0.65028 | 0.82816 |
| 1.18  | 0.75987 | 0.76504 | 0.74369 | 1.18  | 0.77119 | 0.7826  | 0.71572 | 0.84725 | 1.18  | 0.72883 | 0.75533 | 0.65279 | 0.83124 |
| 1.184 | 0.76727 | 0.77282 | 0.75116 | 1.184 | 0.77732 | 0.78899 | 0.72251 | 0.85234 | 1.184 | 0.73265 | 0.76146 | 0.65623 | 0.83547 |
| 1.188 | 0.77296 | 0.77887 | 0.75718 | 1.188 | 0.7827  | 0.7939  | 0.72852 | 0.85616 | 1.188 | 0.73455 | 0.76636 | 0.65842 | 0.83816 |
| 1.192 | 0.77979 | 0.78578 | 0.76407 | 1.192 | 0.78858 | 0.80004 | 0.73505 | 0.86062 | 1.192 | 0.7376  | 0.77208 | 0.66093 | 0.842   |
| 1.196 | 0.78605 | 0.79297 | 0.77067 | 1.196 | 0.79397 | 0.80545 | 0.74159 | 0.86507 | 1.196 | 0.74142 | 0.7782  | 0.66406 | 0.84585 |
| 1.2   | 0.79288 | 0.79988 | 0.77727 | 1.2   | 0.79961 | 0.8111  | 0.74812 | 0.87016 | 1.2   | 0.74447 | 0.78433 | 0.66719 | 0.84969 |
| 1.204 | 0.79914 | 0.80651 | 0.78359 | 1.204 | 0.80524 | 0.81626 | 0.75491 | 0.87398 | 1.204 | 0.7479  | 0.79046 | 0.67032 | 0.85353 |
| 1.208 | 0.80596 | 0.81399 | 0.79019 | 1.208 | 0.81088 | 0.82191 | 0.76171 | 0.87844 | 1.208 | 0.75133 | 0.79699 | 0.67376 | 0.85776 |
| 1.212 | 0.81279 | 0.8209  | 0.79708 | 1.212 | 0.81676 | 0.82756 | 0.76902 | 0.88353 | 1.212 | 0.75515 | 0.80353 | 0.67752 | 0.86199 |
| 1.216 | 0.81962 | 0.82781 | 0.80397 | 1.216 | 0.82264 | 0.83321 | 0.77634 | 0.88798 | 1.216 | 0.75934 | 0.81088 | 0.68159 | 0.86661 |
| 1.22  | 0.82588 | 0.83473 | 0.81086 | 1.22  | 0.82827 | 0.83861 | 0.78339 | 0.89244 | 1.22  | 0.76316 | 0.81742 | 0.68535 | 0.87083 |
| 1.224 | 0.83328 | 0.84164 | 0.81803 | 1.224 | 0.83439 | 0.84451 | 0.79123 | 0.89753 | 1.224 | 0.76697 | 0.82477 | 0.68973 | 0.87583 |
| 1.228 | 0.8401  | 0.84826 | 0.82492 | 1.228 | 0.84076 | 0.85065 | 0.79907 | 0.90262 | 1.228 | 0.77155 | 0.83212 | 0.69411 | 0.88083 |
| 1.232 | 0.84807 | 0.85488 | 0.83209 | 1.232 | 0.84713 | 0.85654 | 0.80743 | 0.90771 | 1.232 | 0.77613 | 0.83947 | 0.6985  | 0.88621 |
| 1.236 | 0.8549  | 0.86122 | 0.83927 | 1.236 | 0.85301 | 0.86244 | 0.81527 | 0.91217 | 1.236 | 0.77994 | 0.84642 | 0.70257 | 0.89082 |
| 1.24  | 0.86173 | 0.86813 | 0.84673 | 1.24  | 0.85987 | 0.86858 | 0.82389 | 0.91662 | 1.24  | 0.78413 | 0.85418 | 0.70695 | 0.89621 |
| 1.244 | 0.86912 | 0.87504 | 0.85448 | 1.244 | 0.86698 | 0.87521 | 0.83251 | 0.92172 | 1.244 | 0.78833 | 0.86194 | 0.71165 | 0.90197 |
| 1.248 | 0.87652 | 0.88195 | 0.86281 | 1.248 | 0.87433 | 0.88209 | 0.84192 | 0.92681 | 1.248 | 0.79405 | 0.87011 | 0.71634 | 0.90774 |
| 1.252 | 0.88392 | 0.88914 | 0.87084 | 1.252 | 0.88143 | 0.88897 | 0.85107 | 0.9319  | 1.252 | 0.79825 | 0.87828 | 0.72104 | 0.91312 |
| 1.256 | 0.89189 | 0.89692 | 0.87974 | 1.256 | 0.88927 | 0.89634 | 0.86126 | 0.93699 | 1.256 | 0.80282 | 0.88686 | 0.72542 | 0.91927 |
| 1.26  | 0.90042 | 0.90469 | 0.88864 | 1.26  | 0.89784 | 0.9042  | 0.87171 | 0.94272 | 1.26  | 0.8074  | 0.89543 | 0.73043 | 0.92542 |
| 1.264 | 0.90896 | 0.91247 | 0.89811 | 1.264 | 0.90642 | 0.91181 | 0.88242 | 0.94781 | 1.264 | 0.81274 | 0.90442 | 0.73482 | 0.93196 |
| 1.268 | 0.91692 | 0.92082 | 0.90729 | 1.268 | 0.91499 | 0.91967 | 0.89313 | 0.9529  | 1.268 | 0.81732 | 0.913   | 0.7392  | 0.93849 |
| 1.272 | 0.92603 | 0.92917 | 0.91705 | 1.272 | 0.92406 | 0.92852 | 0.90463 | 0.95799 | 1.272 | 0.82304 | 0.9228  | 0.74389 | 0.94503 |
| 1.276 | 0.93513 | 0.93838 | 0.92796 | 1.276 | 0.93386 | 0.93761 | 0.91691 | 0.96372 | 1.276 | 0.82914 | 0.9326  | 0.74859 | 0.95272 |
| 1.28  | 0.9448  | 0.94731 | 0.93915 | 1.28  | 0.9439  | 0.94694 | 0.92919 | 0.96945 | 1.28  | 0.83486 | 0.94282 | 0.75329 | 0.96002 |
| 1.284 | 0.95391 | 0.9571  | 0.94977 | 1.284 | 0.9537  | 0.95628 | 0.94199 | 0.97454 | 1.284 | 0.8402  | 0.95303 | 0.75736 | 0.96732 |
| 1.288 | 0.96529 | 0.96775 | 0.96183 | 1.288 | 0.96521 | 0.96684 | 0.9561  | 0.98154 | 1.288 | 0.8463  | 0.96487 | 0.76268 | 0.97578 |
| 1.292 | 0.97667 | 0.97812 | 0.97446 | 1.292 | 0.97648 | 0.97765 | 0.97021 | 0.98727 | 1.292 | 0.8524  | 0.9759  | 0.76769 | 0.98347 |
| 1.296 | 0.98805 | 0.98906 | 0.9868  | 1.296 | 0.98824 | 0.98845 | 0.98485 | 0.99364 | 1.296 | 0.85889 | 0.98775 | 0.7727  | 0.99193 |
| 1.3   | 1       | 1       | 1       | 1.3   | 1       | 1       | 1       | 1       | 1.3   | 0.86499 | 1       | 0.77771 | 1       |

Water-PBS (Spring)

|       |          |         |          |
|-------|----------|---------|----------|
| 0.004 | 0.04462  | 0.07424 | 0.04248  |
| 0.008 | 0.04165  | 0.07053 | 0.0392   |
| 0.012 | 0.03916  | 0.06733 | 0.03625  |
| 0.016 | 0.03677  | 0.0643  | 0.03365  |
| 0.02  | 0.03485  | 0.06177 | 0.03149  |
| 0.024 | 0.03288  | 0.05907 | 0.02933  |
| 0.028 | 0.0314   | 0.05705 | 0.02726  |
| 0.032 | 0.02989  | 0.05452 | 0.02557  |
| 0.036 | 0.02835  | 0.0525  | 0.02378  |
| 0.04  | 0.027    | 0.05031 | 0.02206  |
| 0.044 | 0.02572  | 0.04845 | 0.02067  |
| 0.048 | 0.02446  | 0.04643 | 0.01914  |
| 0.052 | 0.02338  | 0.04475 | 0.01758  |
| 0.056 | 0.02209  | 0.04289 | 0.01628  |
| 0.06  | 0.02107  | 0.04087 | 0.01496  |
| 0.064 | 0.01984  | 0.03902 | 0.01366  |
| 0.068 | 0.01873  | 0.03699 | 0.01242  |
| 0.072 | 0.01761  | 0.03531 | 0.01131  |
| 0.076 | 0.01653  | 0.03345 | 0.0101   |
| 0.08  | 0.01544  | 0.0316  | 0.00876  |
| 0.084 | 0.01444  | 0.03008 | 0.00769  |
| 0.088 | 0.01327  | 0.02806 | 0.00643  |
| 0.092 | 0.01233  | 0.02671 | 0.00532  |
| 0.096 | 0.01125  | 0.02503 | 0.00423  |
| 0.1   | 0.01016  | 0.02334 | 0.00334  |
| 0.104 | 0.00902  | 0.02183 | 0.00248  |
| 0.108 | 0.00788  | 0.02048 | 0.00181  |
| 0.112 | 0.00677  | 0.01913 | 0.00107  |
| 0.116 | 0.00559  | 0.01812 | 4.88E-04 |
| 0.12  | 0.00451  | 0.01677 | 2.32E-05 |
| 0.124 | 0.00368  | 0.0161  | 0        |
| 0.128 | 0.00268  | 0.01525 | 4.64E-05 |
| 0.132 | 0.00194  | 0.01475 | 3.02E-04 |
| 0.136 | 0.0012   | 0.01441 | 7.43E-04 |
| 0.14  | 6.28E-04 | 0.0139  | 0.00158  |
| 0.144 | 1.71E-04 | 0.01407 | 0.00265  |
| 0.148 | 0        | 0.01424 | 0.00399  |

|       |          |          |         |       |         |          |         |         |       |         |         |         |         |
|-------|----------|----------|---------|-------|---------|----------|---------|---------|-------|---------|---------|---------|---------|
| 0.152 | 2.85E-05 | 0.01458  | 0.00548 | 0.152 | 0.02297 | 0.01474  | 0.05088 | 0.12593 | 0.152 | 0.04359 | 0.06149 | 0.04554 | 0.07267 |
| 0.156 | 6.28E-04 | 0.01508  | 0.00762 | 0.156 | 0.02754 | 0.01842  | 0.05967 | 0.14385 | 0.156 | 0.05157 | 0.0712  | 0.05495 | 0.08347 |
| 0.16  | 7.42E-04 | 0.0161   | 0.01006 | 0.16  | 0.03281 | 0.0226   | 0.06926 | 0.16357 | 0.16  | 0.06059 | 0.08198 | 0.06563 | 0.09522 |
| 0.164 | 0.0012   | 0.01744  | 0.01277 | 0.164 | 0.03859 | 0.02751  | 0.07991 | 0.18469 | 0.164 | 0.0704  | 0.09355 | 0.07732 | 0.10765 |
| 0.168 | 0.00166  | 0.01896  | 0.01633 | 0.168 | 0.04529 | 0.03267  | 0.0919  | 0.20742 | 0.168 | 0.08145 | 0.10619 | 0.09056 | 0.12134 |
| 0.172 | 0.00245  | 0.02098  | 0.02053 | 0.172 | 0.05275 | 0.03857  | 0.10522 | 0.23236 | 0.172 | 0.09358 | 0.12018 | 0.10534 | 0.13591 |
| 0.176 | 0.00363  | 0.02334  | 0.02531 | 0.176 | 0.06113 | 0.0452   | 0.11961 | 0.25932 | 0.176 | 0.10709 | 0.13497 | 0.12167 | 0.15166 |
| 0.18  | 0.00494  | 0.02654  | 0.03119 | 0.18  | 0.07045 | 0.05208  | 0.13639 | 0.28882 | 0.18  | 0.1224  | 0.15165 | 0.13979 | 0.16827 |
| 0.184 | 0.00662  | 0.03059  | 0.03806 | 0.184 | 0.08125 | 0.05994  | 0.15397 | 0.32112 | 0.184 | 0.13972 | 0.16994 | 0.16015 | 0.18623 |
| 0.188 | 0.00868  | 0.03548  | 0.04642 | 0.188 | 0.09374 | 0.06853  | 0.17448 | 0.3559  | 0.188 | 0.15918 | 0.19011 | 0.18259 | 0.20515 |
| 0.192 | 0.01122  | 0.04104  | 0.05641 | 0.192 | 0.10808 | 0.07811  | 0.19686 | 0.39472 | 0.192 | 0.18121 | 0.21244 | 0.20777 | 0.22563 |
| 0.196 | 0.01407  | 0.04812  | 0.06826 | 0.196 | 0.12429 | 0.08843  | 0.22163 | 0.43634 | 0.196 | 0.20554 | 0.23691 | 0.23568 | 0.2476  |
| 0.2   | 0.01756  | 0.05671  | 0.08242 | 0.2   | 0.1433  | 0.09998  | 0.24987 | 0.4823  | 0.2   | 0.23301 | 0.26381 | 0.26753 | 0.27157 |
| 0.204 | 0.02172  | 0.06666  | 0.09868 | 0.204 | 0.1651  | 0.11299  | 0.28103 | 0.53137 | 0.204 | 0.26335 | 0.29313 | 0.30335 | 0.29738 |
| 0.208 | 0.02632  | 0.07862  | 0.11795 | 0.208 | 0.18969 | 0.12675  | 0.31486 | 0.58416 | 0.208 | 0.29626 | 0.32406 | 0.34373 | 0.32523 |
| 0.212 | 0.03171  | 0.0921   | 0.13978 | 0.212 | 0.21708 | 0.14247  | 0.35162 | 0.63944 | 0.212 | 0.33089 | 0.35688 | 0.38902 | 0.35477 |
| 0.216 | 0.03779  | 0.10744  | 0.1644  | 0.216 | 0.24727 | 0.15893  | 0.39078 | 0.69627 | 0.216 | 0.36724 | 0.3905  | 0.43924 | 0.38669 |
| 0.22  | 0.04462  | 0.12413  | 0.19134 | 0.22  | 0.27987 | 0.17711  | 0.43154 | 0.75373 | 0.22  | 0.40416 | 0.42412 | 0.49436 | 0.41997 |
| 0.224 | 0.0519   | 0.14216  | 0.22014 | 0.224 | 0.31415 | 0.19627  | 0.47283 | 0.80963 | 0.224 | 0.44022 | 0.4564  | 0.55406 | 0.45461 |
| 0.228 | 0.05955  | 0.16036  | 0.2501  | 0.228 | 0.34844 | 0.21567  | 0.51305 | 0.86118 | 0.228 | 0.47399 | 0.48599 | 0.61691 | 0.48925 |
| 0.232 | 0.06734  | 0.17873  | 0.28075 | 0.232 | 0.38198 | 0.23532  | 0.55141 | 0.90745 | 0.232 | 0.50432 | 0.51208 | 0.68257 | 0.52389 |
| 0.236 | 0.07536  | 0.19643  | 0.31095 | 0.236 | 0.41365 | 0.25448  | 0.58551 | 0.94658 | 0.236 | 0.52979 | 0.53306 | 0.74788 | 0.55751 |
| 0.24  | 0.08301  | 0.21261  | 0.33905 | 0.24  | 0.44178 | 0.27241  | 0.61428 | 0.97578 | 0.24  | 0.54925 | 0.54785 | 0.81039 | 0.58875 |
| 0.244 | 0.09026  | 0.22643  | 0.36436 | 0.244 | 0.4647  | 0.28789  | 0.63559 | 0.99379 | 0.244 | 0.56185 | 0.55565 | 0.86762 | 0.61694 |
| 0.248 | 0.09654  | 0.23721  | 0.38526 | 0.248 | 0.48184 | 0.30115  | 0.64944 | 1       | 0.248 | 0.567   | 0.55619 | 0.91713 | 0.64105 |
| 0.252 | 0.10225  | 0.24497  | 0.40175 | 0.252 | 0.49228 | 0.31123  | 0.6537  | 0.99472 | 0.252 | 0.56413 | 0.55    | 0.95541 | 0.66041 |
| 0.256 | 0.10682  | 0.24884  | 0.41197 | 0.256 | 0.49544 | 0.31737  | 0.64917 | 0.97795 | 0.256 | 0.5544  | 0.53682 | 0.98034 | 0.67365 |
| 0.26  | 0.11024  | 0.24867  | 0.41592 | 0.26  | 0.49135 | 0.31982  | 0.63506 | 0.95062 | 0.26  | 0.53809 | 0.51773 | 0.99052 | 0.68044 |
| 0.264 | 0.11281  | 0.24497  | 0.4136  | 0.264 | 0.48054 | 0.31884  | 0.61375 | 0.91491 | 0.264 | 0.5172  | 0.49432 | 0.98595 | 0.6818  |
| 0.268 | 0.11395  | 0.23772  | 0.40523 | 0.268 | 0.46358 | 0.31417  | 0.58551 | 0.87236 | 0.268 | 0.49144 | 0.46716 | 0.96594 | 0.67671 |
| 0.272 | 0.11424  | 0.2271   | 0.3913  | 0.272 | 0.44123 | 0.30607  | 0.55168 | 0.82516 | 0.272 | 0.4634  | 0.43784 | 0.93223 | 0.66584 |
| 0.276 | 0.11395  | 0.21412  | 0.37272 | 0.276 | 0.41533 | 0.29501  | 0.51492 | 0.77609 | 0.276 | 0.43363 | 0.40691 | 0.88693 | 0.65022 |
| 0.28  | 0.11253  | 0.19912  | 0.35043 | 0.28  | 0.38645 | 0.28126  | 0.47629 | 0.72609 | 0.28  | 0.40301 | 0.37624 | 0.83356 | 0.63052 |
| 0.284 | 0.11053  | 0.18328  | 0.32604 | 0.284 | 0.35626 | 0.26603  | 0.4374  | 0.67795 | 0.284 | 0.37325 | 0.34666 | 0.77527 | 0.60845 |
| 0.288 | 0.10796  | 0.1666   | 0.2998  | 0.288 | 0.32571 | 0.24932  | 0.39984 | 0.6323  | 0.288 | 0.34406 | 0.31815 | 0.71347 | 0.58434 |
| 0.292 | 0.10453  | 0.15008  | 0.27332 | 0.292 | 0.29515 | 0.23139  | 0.36414 | 0.58975 | 0.292 | 0.31658 | 0.29125 | 0.65238 | 0.55853 |
| 0.296 | 0.10054  | 0.13373  | 0.24708 | 0.296 | 0.26608 | 0.21346  | 0.33111 | 0.55155 | 0.296 | 0.29082 | 0.26704 | 0.59338 | 0.53374 |
| 0.3   | 0.09625  | 0.11856  | 0.22177 | 0.3   | 0.2387  | 0.19528  | 0.30101 | 0.51739 | 0.3   | 0.26736 | 0.24471 | 0.53791 | 0.50929 |
| 0.304 | 0.0914   | 0.10424  | 0.19738 | 0.304 | 0.21317 | 0.1776   | 0.27357 | 0.48727 | 0.304 | 0.24561 | 0.22454 | 0.48664 | 0.48552 |
| 0.308 | 0.08626  | 0.09092  | 0.17485 | 0.308 | 0.18988 | 0.16016  | 0.24933 | 0.46087 | 0.308 | 0.22586 | 0.20652 | 0.44064 | 0.46344 |
| 0.312 | 0.08055  | 0.07862  | 0.15418 | 0.312 | 0.16864 | 0.14345  | 0.22749 | 0.43758 | 0.312 | 0.20812 | 0.19038 | 0.39956 | 0.44273 |
| 0.316 | 0.07485  | 0.06784  | 0.13537 | 0.316 | 0.14963 | 0.12773  | 0.20858 | 0.41739 | 0.316 | 0.19238 | 0.17613 | 0.36409 | 0.42405 |
| 0.32  | 0.06894  | 0.05823  | 0.11842 | 0.32  | 0.13287 | 0.11299  | 0.1918  | 0.39969 | 0.32  | 0.17864 | 0.16348 | 0.33284 | 0.40673 |
| 0.324 | 0.06291  | 0.0493   | 0.10309 | 0.324 | 0.11815 | 0.09924  | 0.17688 | 0.38447 | 0.324 | 0.16605 | 0.15246 | 0.30616 | 0.39111 |
| 0.328 | 0.05718  | 0.04154  | 0.08939 | 0.328 | 0.1051  | 0.08671  | 0.16383 | 0.37112 | 0.328 | 0.15517 | 0.1425  | 0.28263 | 0.37719 |
| 0.332 | 0.05141  | 0.03463  | 0.07731 | 0.332 | 0.09374 | 0.07517  | 0.15237 | 0.35963 | 0.332 | 0.14601 | 0.1339  | 0.26261 | 0.36428 |
| 0.336 | 0.04604  | 0.02874  | 0.06663 | 0.336 | 0.08386 | 0.06485  | 0.14225 | 0.34969 | 0.336 | 0.13771 | 0.12637 | 0.24541 | 0.35274 |
| 0.34  | 0.04079  | 0.02351  | 0.05688 | 0.34  | 0.07529 | 0.05551  | 0.13346 | 0.34068 | 0.34  | 0.13056 | 0.11991 | 0.2307  | 0.34255 |
| 0.344 | 0.03594  | 0.01896  | 0.04851 | 0.344 | 0.06784 | 0.04692  | 0.12573 | 0.33323 | 0.344 | 0.12438 | 0.11399 | 0.21813 | 0.33304 |
| 0.348 | 0.03137  | 0.01508  | 0.04178 | 0.348 | 0.0615  | 0.03955  | 0.11881 | 0.32671 | 0.348 | 0.11917 | 0.10942 | 0.20752 | 0.32489 |
| 0.352 | 0.02732  | 0.01154  | 0.03523 | 0.352 | 0.0561  | 0.03292  | 0.11295 | 0.3205  | 0.352 | 0.11485 | 0.10538 | 0.19843 | 0.31742 |
| 0.356 | 0.02346  | 0.00885  | 0.03003 | 0.356 | 0.05163 | 0.02677  | 0.10762 | 0.31553 | 0.356 | 0.11116 | 0.10189 | 0.1906  | 0.31063 |
| 0.36  | 0.02015  | 0.00632  | 0.02538 | 0.36  | 0.0479  | 0.02186  | 0.10309 | 0.31118 | 0.36  | 0.10815 | 0.0992  | 0.18431 | 0.30485 |
| 0.364 | 0.01718  | 0.00447  | 0.02164 | 0.364 | 0.04492 | 0.01769  | 0.09963 | 0.30807 | 0.364 | 0.106   | 0.09732 | 0.17961 | 0.3001  |
| 0.368 | 0.01467  | 0.00295  | 0.01842 | 0.368 | 0.04231 | 0.01376  | 0.0967  | 0.30466 | 0.368 | 0.10429 | 0.0957  | 0.17546 | 0.29568 |
| 0.372 | 0.0123   | 0.00177  | 0.01561 | 0.372 | 0.04026 | 0.01056  | 0.09403 | 0.30217 | 0.372 | 0.10303 | 0.09463 | 0.17223 | 0.29161 |
| 0.376 | 0.01016  | 6.74E-04 | 0.0134  | 0.376 | 0.03859 | 0.00786  | 0.0919  | 0.30031 | 0.376 | 0.10226 | 0.09382 | 0.16988 | 0.28821 |
| 0.38  | 0.00845  | 4.38E-04 | 0.01184 | 0.38  | 0.03747 | 0.00565  | 0.0903  | 0.29907 | 0.38  | 0.10183 | 0.09382 | 0.16848 | 0.2855  |
| 0.384 | 0.00714  | 1.01E-04 | 0.01052 | 0.384 | 0.03672 | 0.00393  | 0.08924 | 0.29814 | 0.384 | 0.10191 | 0.09409 | 0.16763 | 0.28312 |
| 0.388 | 0.00588  | 0        | 0.00952 | 0.388 | 0.03616 | 0.00246  | 0.08844 | 0.29752 | 0.388 | 0.10237 | 0.09463 | 0.16732 | 0.28142 |
| 0.392 | 0.00491  | 8.43E-05 | 0.00889 | 0.392 | 0.03598 | 0.00147  | 0.08817 | 0.29783 | 0.392 | 0.10331 | 0.0957  | 0.16781 | 0.28006 |
| 0.396 | 0.00414  | 6.40E-04 | 0.00864 | 0.396 | 0.03616 | 7.37E-04 | 0.08817 | 0.29845 | 0.396 | 0.10454 | 0.09678 | 0.16886 | 0.27904 |
| 0.4   | 0.00368  | 0.0013   | 0.00866 | 0.4   | 0.03654 | 4.91E-04 | 0.08871 | 0.29938 | 0.4   | 0.10595 | 0.09839 | 0.17044 | 0.2787  |
| 0.404 | 0.0034   | 0.00211  | 0.00889 | 0.404 | 0.0371  | 0        | 0.08924 | 0.30062 | 0.404 | 0.10775 | 0.10027 | 0.17234 | 0.27836 |
| 0.408 | 0.00317  | 0.00312  | 0.00936 | 0.408 | 0.03803 | 2.46E-04 | 0.0903  | 0.30248 | 0.408 | 0.1097  | 0.10243 | 0.1749  | 0.2787  |
| 0.412 | 0.00311  | 0.00463  | 0.01008 | 0.412 | 0.03915 | 4.91E-04 | 0.09164 | 0.30466 | 0.412 | 0.11196 | 0.10485 | 0.17767 | 0.27972 |
| 0.416 | 0.00323  | 0.00615  | 0.01105 | 0.416 | 0.04045 | 7.37E-04 | 0.09323 | 0.30714 | 0.416 | 0.11439 | 0.10727 | 0.18066 | 0.2804  |
| 0.42  | 0.00343  | 0.00767  | 0.01229 | 0.42  | 0.04175 | 0.00147  | 0.0951  | 0.31025 | 0.42  | 0.11708 | 0.10996 | 0.18424 | 0.28176 |
| 0.424 | 0.00388  | 0.00969  | 0.01356 | 0.424 | 0.04343 | 0.00246  | 0.09723 | 0.31335 | 0.424 | 0.12011 | 0.11292 | 0.18814 | 0.2838  |
| 0.428 | 0.00442  | 0.01171  | 0.01533 | 0.428 | 0.04511 | 0.00319  | 0.09989 | 0.31739 | 0.428 | 0.1234  | 0.11587 | 0.19214 | 0.2855  |
| 0.432 | 0.00505  | 0.01407  | 0.01709 | 0.432 | 0.04716 | 0.00442  | 0.10229 | 0.32112 | 0.432 | 0.12684 | 0.1191  | 0.19639 | 0.28821 |
| 0.436 | 0.00585  | 0.0166   | 0.01895 | 0.436 | 0.04921 | 0.00565  | 0.10522 | 0.32547 | 0.436 | 0.13056 | 0.1226  | 0.20088 | 0.29059 |
| 0.44  | 0.00645  | 0.0193   | 0.0212  | 0.44  | 0.05163 | 0.00688  | 0.10868 | 0.33012 | 0.44  | 0.13428 | 0.1261  | 0.20541 | 0.29365 |
| 0.444 | 0.00728  | 0.02216  | 0.02353 | 0.444 | 0.05405 | 0.0086   | 0.11215 | 0.33509 | 0.444 | 0.13857 | 0.13013 | 0.21015 | 0.2967  |
| 0.448 | 0.00819  | 0.02536  | 0.02603 | 0.448 | 0.05666 | 0.01007  | 0.11588 | 0.34068 | 0.448 | 0.14287 | 0.13417 | 0.21507 | 0.3001  |
| 0.452 | 0.00896  | 0.02823  | 0.02884 | 0     |         |          |         |         |       |         |         |         |         |



|       |         |         |         |       |         |         |         |         |       |         |         |         |         |
|-------|---------|---------|---------|-------|---------|---------|---------|---------|-------|---------|---------|---------|---------|
| 0.564 | 0.05335 | 0.1248  | 0.14443 | 0.564 | 0.14535 | 0.12257 | 0.24987 | 0.49193 | 0.564 | 0.26192 | 0.23907 | 0.34689 | 0.40503 |
| 0.568 | 0.0572  | 0.12986 | 0.15047 | 0.568 | 0.15001 | 0.13019 | 0.2536  | 0.49348 | 0.568 | 0.26421 | 0.24122 | 0.34794 | 0.40469 |
| 0.572 | 0.06172 | 0.13542 | 0.15697 | 0.572 | 0.15504 | 0.1383  | 0.25759 | 0.49565 | 0.572 | 0.26678 | 0.24364 | 0.34935 | 0.40503 |
| 0.576 | 0.0664  | 0.14132 | 0.16371 | 0.576 | 0.16044 | 0.14665 | 0.26212 | 0.49783 | 0.576 | 0.26965 | 0.24606 | 0.3504  | 0.40503 |
| 0.58  | 0.07116 | 0.14738 | 0.17091 | 0.58  | 0.16603 | 0.15549 | 0.26665 | 0.49938 | 0.58  | 0.27251 | 0.24875 | 0.35145 | 0.40469 |
| 0.584 | 0.0767  | 0.15412 | 0.17903 | 0.584 | 0.17218 | 0.16458 | 0.27198 | 0.50186 | 0.584 | 0.27566 | 0.25171 | 0.35321 | 0.40469 |
| 0.588 | 0.08255 | 0.1612  | 0.18763 | 0.588 | 0.1787  | 0.17391 | 0.27757 | 0.50435 | 0.588 | 0.27938 | 0.2552  | 0.35496 | 0.40469 |
| 0.592 | 0.08855 | 0.16862 | 0.19668 | 0.592 | 0.18559 | 0.18374 | 0.2837  | 0.50683 | 0.592 | 0.28338 | 0.25897 | 0.35707 | 0.40503 |
| 0.596 | 0.09511 | 0.17654 | 0.20597 | 0.596 | 0.19249 | 0.19356 | 0.29036 | 0.50994 | 0.596 | 0.28739 | 0.26301 | 0.35953 | 0.40537 |
| 0.6   | 0.10196 | 0.18446 | 0.21596 | 0.6   | 0.19975 | 0.20388 | 0.29728 | 0.51304 | 0.6   | 0.29197 | 0.26758 | 0.36269 | 0.40605 |
| 0.604 | 0.10939 | 0.19272 | 0.22618 | 0.604 | 0.20739 | 0.2142  | 0.30474 | 0.51646 | 0.604 | 0.29712 | 0.27215 | 0.36585 | 0.40707 |
| 0.608 | 0.11709 | 0.20131 | 0.23686 | 0.608 | 0.21503 | 0.22451 | 0.31247 | 0.52019 | 0.608 | 0.30227 | 0.27726 | 0.36971 | 0.40877 |
| 0.612 | 0.12509 | 0.20957 | 0.24708 | 0.612 | 0.22249 | 0.23459 | 0.32019 | 0.52422 | 0.612 | 0.30742 | 0.28237 | 0.37357 | 0.41047 |
| 0.616 | 0.13365 | 0.21817 | 0.25799 | 0.616 | 0.22994 | 0.24466 | 0.32845 | 0.52857 | 0.616 | 0.31343 | 0.28802 | 0.37814 | 0.4125  |
| 0.62  | 0.1425  | 0.22626 | 0.26868 | 0.62  | 0.23702 | 0.25424 | 0.33644 | 0.53323 | 0.62  | 0.31887 | 0.29394 | 0.3827  | 0.41488 |
| 0.624 | 0.15163 | 0.23401 | 0.2789  | 0.624 | 0.24391 | 0.26357 | 0.3447  | 0.53758 | 0.624 | 0.32488 | 0.29985 | 0.38797 | 0.41794 |
| 0.628 | 0.16134 | 0.24176 | 0.28865 | 0.628 | 0.25025 | 0.27217 | 0.35269 | 0.54224 | 0.628 | 0.33061 | 0.3055  | 0.39324 | 0.42099 |
| 0.632 | 0.17104 | 0.2485  | 0.29771 | 0.632 | 0.25621 | 0.28028 | 0.36068 | 0.54689 | 0.632 | 0.33633 | 0.31142 | 0.3985  | 0.42439 |
| 0.636 | 0.18075 | 0.25525 | 0.3063  | 0.636 | 0.26161 | 0.28789 | 0.36841 | 0.55186 | 0.636 | 0.34234 | 0.31734 | 0.40447 | 0.42846 |
| 0.64  | 0.19103 | 0.26114 | 0.3142  | 0.64  | 0.26646 | 0.29452 | 0.37587 | 0.55652 | 0.64  | 0.34778 | 0.32352 | 0.41044 | 0.43288 |
| 0.644 | 0.2013  | 0.2662  | 0.3207  | 0.644 | 0.27018 | 0.30017 | 0.38279 | 0.56087 | 0.644 | 0.35321 | 0.3289  | 0.41571 | 0.43695 |
| 0.648 | 0.21158 | 0.27058 | 0.32651 | 0.648 | 0.27335 | 0.30484 | 0.38945 | 0.56553 | 0.648 | 0.35808 | 0.33428 | 0.42168 | 0.44137 |
| 0.652 | 0.22157 | 0.27429 | 0.33115 | 0.652 | 0.27577 | 0.30877 | 0.39584 | 0.57019 | 0.652 | 0.36266 | 0.33966 | 0.42765 | 0.44612 |
| 0.656 | 0.23156 | 0.27716 | 0.33487 | 0.656 | 0.27764 | 0.31172 | 0.40144 | 0.57422 | 0.656 | 0.36695 | 0.3445  | 0.43327 | 0.45054 |
| 0.66  | 0.24127 | 0.27935 | 0.33742 | 0.66  | 0.27838 | 0.31393 | 0.40677 | 0.57826 | 0.66  | 0.37096 | 0.34881 | 0.43853 | 0.45529 |
| 0.664 | 0.25097 | 0.28069 | 0.33928 | 0.664 | 0.27857 | 0.31466 | 0.41129 | 0.58168 | 0.664 | 0.37411 | 0.35311 | 0.44345 | 0.45971 |
| 0.668 | 0.26011 | 0.28171 | 0.33998 | 0.668 | 0.27819 | 0.31491 | 0.41556 | 0.58509 | 0.668 | 0.37697 | 0.35688 | 0.44837 | 0.46446 |
| 0.672 | 0.26895 | 0.28187 | 0.33998 | 0.672 | 0.27745 | 0.31466 | 0.41955 | 0.5882  | 0.672 | 0.37954 | 0.36064 | 0.45293 | 0.46888 |
| 0.676 | 0.27723 | 0.2812  | 0.33881 | 0.676 | 0.27559 | 0.31319 | 0.42222 | 0.59037 | 0.676 | 0.38097 | 0.36333 | 0.45679 | 0.47261 |
| 0.68  | 0.28522 | 0.28002 | 0.33696 | 0.68  | 0.27372 | 0.31098 | 0.42461 | 0.59255 | 0.68  | 0.38241 | 0.36575 | 0.4603  | 0.47669 |
| 0.684 | 0.29208 | 0.27884 | 0.3344  | 0.684 | 0.27149 | 0.30828 | 0.42648 | 0.59441 | 0.684 | 0.38326 | 0.36791 | 0.46311 | 0.48042 |
| 0.688 | 0.29893 | 0.27665 | 0.33115 | 0.688 | 0.26888 | 0.30484 | 0.42781 | 0.59534 | 0.688 | 0.38326 | 0.36925 | 0.46557 | 0.48348 |
| 0.692 | 0.30464 | 0.27429 | 0.32767 | 0.692 | 0.2659  | 0.30115 | 0.42861 | 0.59596 | 0.692 | 0.38326 | 0.37033 | 0.46768 | 0.4862  |
| 0.696 | 0.31006 | 0.27159 | 0.32372 | 0.696 | 0.2631  | 0.29673 | 0.42888 | 0.59627 | 0.696 | 0.38241 | 0.37086 | 0.46908 | 0.48857 |
| 0.7   | 0.31434 | 0.2689  | 0.31931 | 0.7   | 0.26012 | 0.29256 | 0.42861 | 0.59596 | 0.7   | 0.38155 | 0.37113 | 0.47014 | 0.49095 |
| 0.704 | 0.31805 | 0.26603 | 0.31466 | 0.704 | 0.25714 | 0.28789 | 0.42808 | 0.59534 | 0.704 | 0.38012 | 0.37086 | 0.47084 | 0.49265 |
| 0.708 | 0.32091 | 0.26283 | 0.30978 | 0.708 | 0.25397 | 0.28273 | 0.42674 | 0.5941  | 0.708 | 0.3784  | 0.37033 | 0.47049 | 0.49401 |
| 0.712 | 0.32348 | 0.2598  | 0.30491 | 0.712 | 0.25118 | 0.27757 | 0.42541 | 0.59224 | 0.712 | 0.3764  | 0.36952 | 0.47049 | 0.49502 |
| 0.716 | 0.32519 | 0.25676 | 0.30003 | 0.716 | 0.24838 | 0.27266 | 0.42381 | 0.59037 | 0.716 | 0.37439 | 0.36844 | 0.46978 | 0.4957  |
| 0.72  | 0.32633 | 0.25373 | 0.29492 | 0.72  | 0.24578 | 0.26726 | 0.42195 | 0.5882  | 0.72  | 0.3721  | 0.3671  | 0.46873 | 0.49638 |
| 0.724 | 0.3269  | 0.2507  | 0.28981 | 0.724 | 0.24317 | 0.2621  | 0.41955 | 0.58509 | 0.724 | 0.36981 | 0.36548 | 0.46698 | 0.49638 |
| 0.728 | 0.32719 | 0.24783 | 0.28493 | 0.728 | 0.24093 | 0.25669 | 0.41716 | 0.58199 | 0.728 | 0.36752 | 0.36387 | 0.46522 | 0.49638 |
| 0.732 | 0.3269  | 0.2453  | 0.28052 | 0.732 | 0.23888 | 0.25178 | 0.41476 | 0.57857 | 0.732 | 0.36523 | 0.36199 | 0.46382 | 0.49604 |
| 0.736 | 0.32633 | 0.24277 | 0.27588 | 0.736 | 0.23702 | 0.24687 | 0.41236 | 0.57516 | 0.736 | 0.36294 | 0.36037 | 0.46171 | 0.49604 |
| 0.74  | 0.32519 | 0.24041 | 0.27146 | 0.74  | 0.23534 | 0.2422  | 0.4097  | 0.57112 | 0.74  | 0.36037 | 0.35849 | 0.4596  | 0.49536 |
| 0.744 | 0.32348 | 0.23839 | 0.26752 | 0.744 | 0.23404 | 0.23753 | 0.4073  | 0.56739 | 0.744 | 0.35837 | 0.35661 | 0.45785 | 0.49435 |
| 0.748 | 0.32176 | 0.23654 | 0.2638  | 0.748 | 0.23292 | 0.23311 | 0.4049  | 0.56335 | 0.748 | 0.35665 | 0.35499 | 0.45574 | 0.49401 |
| 0.752 | 0.32005 | 0.23468 | 0.26032 | 0.752 | 0.23199 | 0.22918 | 0.40277 | 0.55901 | 0.752 | 0.35493 | 0.35338 | 0.45398 | 0.49333 |
| 0.756 | 0.31777 | 0.23334 | 0.25707 | 0.756 | 0.23106 | 0.22525 | 0.40037 | 0.55497 | 0.756 | 0.35321 | 0.35177 | 0.45188 | 0.49265 |
| 0.76  | 0.31548 | 0.23199 | 0.25428 | 0.76  | 0.2305  | 0.22181 | 0.39851 | 0.55062 | 0.76  | 0.35178 | 0.35042 | 0.45012 | 0.49197 |
| 0.764 | 0.3132  | 0.23098 | 0.25172 | 0.764 | 0.23031 | 0.21837 | 0.39691 | 0.54658 | 0.764 | 0.35092 | 0.34908 | 0.44872 | 0.49163 |
| 0.768 | 0.31063 | 0.23047 | 0.24963 | 0.768 | 0.23012 | 0.21543 | 0.39531 | 0.54255 | 0.768 | 0.34978 | 0.34827 | 0.44731 | 0.49129 |
| 0.772 | 0.30806 | 0.22963 | 0.24801 | 0.772 | 0.23012 | 0.21272 | 0.39371 | 0.53851 | 0.772 | 0.34921 | 0.34719 | 0.44591 | 0.49061 |
| 0.776 | 0.30606 | 0.2298  | 0.24685 | 0.776 | 0.23087 | 0.21076 | 0.39345 | 0.5354  | 0.776 | 0.34921 | 0.34746 | 0.44556 | 0.49095 |
| 0.78  | 0.30321 | 0.22946 | 0.24545 | 0.78  | 0.23124 | 0.20879 | 0.39265 | 0.53168 | 0.78  | 0.34892 | 0.34719 | 0.4445  | 0.49095 |
| 0.784 | 0.30092 | 0.22946 | 0.24476 | 0.784 | 0.23199 | 0.20683 | 0.39212 | 0.52826 | 0.784 | 0.34863 | 0.34666 | 0.44415 | 0.49129 |
| 0.788 | 0.29836 | 0.22963 | 0.24406 | 0.788 | 0.23255 | 0.20511 | 0.39158 | 0.52484 | 0.788 | 0.34863 | 0.34666 | 0.44345 | 0.49129 |
| 0.792 | 0.29579 | 0.23013 | 0.2436  | 0.792 | 0.23348 | 0.20388 | 0.39132 | 0.52143 | 0.792 | 0.34892 | 0.34666 | 0.44345 | 0.49163 |
| 0.796 | 0.2935  | 0.23047 | 0.24336 | 0.796 | 0.2346  | 0.2029  | 0.39132 | 0.51863 | 0.796 | 0.34949 | 0.34719 | 0.44345 | 0.49231 |
| 0.8   | 0.2915  | 0.23148 | 0.2436  | 0.8   | 0.2359  | 0.20241 | 0.39158 | 0.51584 | 0.8   | 0.34978 | 0.34773 | 0.4438  | 0.49299 |
| 0.804 | 0.28922 | 0.23199 | 0.2436  | 0.804 | 0.23702 | 0.20142 | 0.39185 | 0.51304 | 0.804 | 0.35035 | 0.34827 | 0.44415 | 0.49367 |
| 0.808 | 0.28751 | 0.23317 | 0.24429 | 0.808 | 0.2387  | 0.20118 | 0.39238 | 0.51087 | 0.808 | 0.35092 | 0.34908 | 0.44485 | 0.49435 |
| 0.812 | 0.28608 | 0.23435 | 0.24522 | 0.812 | 0.24037 | 0.20142 | 0.39345 | 0.50839 | 0.812 | 0.35207 | 0.34988 | 0.44556 | 0.4957  |
| 0.816 | 0.28465 | 0.23586 | 0.24592 | 0.816 | 0.24205 | 0.20118 | 0.39425 | 0.50652 | 0.816 | 0.35264 | 0.35069 | 0.44661 | 0.49672 |
| 0.82  | 0.28351 | 0.23704 | 0.24708 | 0.82  | 0.24391 | 0.20167 | 0.39505 | 0.50435 | 0.82  | 0.3535  | 0.3515  | 0.44731 | 0.49774 |
| 0.824 | 0.28208 | 0.23822 | 0.24778 | 0.824 | 0.24559 | 0.20167 | 0.39558 | 0.50217 | 0.824 | 0.35379 | 0.35204 | 0.44801 | 0.49842 |
| 0.828 | 0.28151 | 0.23991 | 0.2494  | 0.828 | 0.24782 | 0.20216 | 0.39664 | 0.50062 | 0.828 | 0.35493 | 0.35311 | 0.44942 | 0.49944 |
| 0.832 | 0.28094 | 0.24159 | 0.2508  | 0.832 | 0.24987 | 0.2029  | 0.39771 | 0.49876 | 0.832 | 0.35579 | 0.35392 | 0.45082 | 0.5008  |
| 0.836 | 0.28094 | 0.24328 | 0.25242 | 0.836 | 0.25192 | 0.20364 | 0.39877 | 0.4972  | 0.836 | 0.35665 | 0.35499 | 0.45188 | 0.50148 |
| 0.84  | 0.28066 | 0.24497 | 0.25405 | 0.84  | 0.25416 | 0.20462 | 0.40011 | 0.49596 | 0.84  | 0.35751 | 0.3558  | 0.45328 | 0.5025  |
| 0.844 | 0.28123 | 0.24716 | 0.2559  | 0.844 | 0.25658 | 0.2056  | 0.40117 | 0.49472 | 0.844 | 0.35837 | 0.35688 | 0.45469 | 0.50351 |
| 0.848 | 0.2818  | 0.24867 | 0.25776 | 0.848 | 0.25882 | 0.20658 | 0.40224 | 0.49348 | 0.848 | 0.35922 | 0.35768 | 0.45609 | 0.50419 |
| 0.852 | 0.28237 | 0.25053 | 0.25939 | 0.852 | 0.26087 | 0.20757 | 0.4033  | 0.49224 | 0.852 | 0.3598  | 0.35849 | 0.45749 | 0.50487 |
| 0.856 | 0.28323 | 0.25238 | 0.26125 | 0.856 | 0.2631  | 0.20855 | 0.4041  | 0.49099 | 0.856 | 0.36037 | 0.3593  | 0.4589  | 0.50521 |
| 0.86  | 0.28437 | 0.2544  | 0.2631  | 0.86  | 0.26534 | 0.21002 | 0.40517 | 0.48975 | 0.86  | 0.36094 | 0.35984 | 0.45995 | 0.50589 |
| 0.864 | 0.2858  | 0.25609 | 0.26496 | 0.    |         |         |         |         |       |         |         |         |         |

|       |         |         |         |       |         |         |         |         |       |         |         |         |         |
|-------|---------|---------|---------|-------|---------|---------|---------|---------|-------|---------|---------|---------|---------|
| 0.976 | 0.34403 | 0.30446 | 0.30886 | 0.976 | 0.30335 | 0.25104 | 0.41183 | 0.4618  | 0.976 | 0.37783 | 0.37705 | 0.4891  | 0.49129 |
| 0.98  | 0.34631 | 0.30732 | 0.31118 | 0.98  | 0.30558 | 0.2535  | 0.41263 | 0.4618  | 0.98  | 0.38012 | 0.37866 | 0.49085 | 0.49197 |
| 0.984 | 0.34888 | 0.31052 | 0.31373 | 0.984 | 0.30801 | 0.25596 | 0.41369 | 0.46149 | 0.984 | 0.38212 | 0.38028 | 0.49226 | 0.49265 |
| 0.988 | 0.35116 | 0.31406 | 0.31652 | 0.988 | 0.31061 | 0.25841 | 0.41476 | 0.46149 | 0.988 | 0.38412 | 0.38243 | 0.49436 | 0.49333 |
| 0.992 | 0.35373 | 0.3176  | 0.31931 | 0.992 | 0.31341 | 0.26136 | 0.41582 | 0.4618  | 0.992 | 0.3867  | 0.38431 | 0.49647 | 0.49435 |
| 0.996 | 0.3563  | 0.32114 | 0.32186 | 0.996 | 0.31602 | 0.26406 | 0.41689 | 0.4618  | 0.996 | 0.38899 | 0.3862  | 0.49823 | 0.49536 |
| 1     | 0.35887 | 0.32519 | 0.32511 | 1     | 0.319   | 0.26701 | 0.41822 | 0.46242 | 1     | 0.39156 | 0.38835 | 0.50033 | 0.49672 |
| 1.004 | 0.36173 | 0.32906 | 0.32836 | 1.004 | 0.32217 | 0.2702  | 0.42009 | 0.46304 | 1.004 | 0.39443 | 0.39104 | 0.50279 | 0.49808 |
| 1.008 | 0.36458 | 0.33328 | 0.33185 | 1.008 | 0.32533 | 0.2734  | 0.42195 | 0.46366 | 1.008 | 0.39729 | 0.39346 | 0.50525 | 0.49978 |
| 1.012 | 0.36744 | 0.33715 | 0.3351  | 1.012 | 0.3285  | 0.27708 | 0.42355 | 0.46429 | 1.012 | 0.40015 | 0.39588 | 0.50736 | 0.50114 |
| 1.016 | 0.37058 | 0.3412  | 0.33858 | 1.016 | 0.33186 | 0.28052 | 0.42541 | 0.46522 | 1.016 | 0.4033  | 0.39884 | 0.51017 | 0.50318 |
| 1.02  | 0.374   | 0.34575 | 0.3423  | 1.02  | 0.3354  | 0.28445 | 0.42808 | 0.46615 | 1.02  | 0.40673 | 0.4018  | 0.51297 | 0.50521 |
| 1.024 | 0.37743 | 0.35013 | 0.34625 | 1.024 | 0.33912 | 0.28814 | 0.43021 | 0.46739 | 1.024 | 0.41017 | 0.40502 | 0.51578 | 0.50725 |
| 1.028 | 0.38085 | 0.35434 | 0.35019 | 1.028 | 0.34248 | 0.29182 | 0.43234 | 0.46832 | 1.028 | 0.41331 | 0.40798 | 0.51859 | 0.50929 |
| 1.032 | 0.38485 | 0.35889 | 0.35437 | 1.032 | 0.34639 | 0.29624 | 0.43527 | 0.46988 | 1.032 | 0.41732 | 0.41148 | 0.52175 | 0.512   |
| 1.036 | 0.38827 | 0.36311 | 0.35855 | 1.036 | 0.35011 | 0.30066 | 0.4382  | 0.47143 | 1.036 | 0.42104 | 0.41471 | 0.52491 | 0.51472 |
| 1.04  | 0.39227 | 0.36783 | 0.36297 | 1.04  | 0.35421 | 0.30484 | 0.44113 | 0.47298 | 1.04  | 0.42505 | 0.4182  | 0.52842 | 0.5171  |
| 1.044 | 0.39627 | 0.37204 | 0.36738 | 1.044 | 0.35813 | 0.30926 | 0.44433 | 0.47453 | 1.044 | 0.42877 | 0.42197 | 0.53194 | 0.52015 |
| 1.048 | 0.40026 | 0.37659 | 0.37179 | 1.048 | 0.36223 | 0.31393 | 0.44752 | 0.4764  | 1.048 | 0.43277 | 0.42574 | 0.53545 | 0.52321 |
| 1.052 | 0.40454 | 0.38097 | 0.37644 | 1.052 | 0.36651 | 0.31909 | 0.45099 | 0.47826 | 1.052 | 0.43735 | 0.42977 | 0.53931 | 0.52627 |
| 1.056 | 0.40883 | 0.38586 | 0.38131 | 1.056 | 0.37098 | 0.324   | 0.45471 | 0.48043 | 1.056 | 0.44165 | 0.43407 | 0.54317 | 0.53    |
| 1.06  | 0.41311 | 0.39041 | 0.38619 | 1.06  | 0.37508 | 0.3294  | 0.45844 | 0.48261 | 1.06  | 0.44594 | 0.43811 | 0.54703 | 0.53306 |
| 1.064 | 0.41739 | 0.39547 | 0.39107 | 1.064 | 0.37974 | 0.33456 | 0.46244 | 0.48478 | 1.064 | 0.45052 | 0.44268 | 0.55125 | 0.53679 |
| 1.068 | 0.42224 | 0.40052 | 0.39618 | 1.068 | 0.3844  | 0.34021 | 0.4667  | 0.48727 | 1.068 | 0.4551  | 0.44725 | 0.55511 | 0.54087 |
| 1.072 | 0.42681 | 0.40507 | 0.40129 | 1.072 | 0.38943 | 0.34611 | 0.47096 | 0.49006 | 1.072 | 0.45996 | 0.45183 | 0.55932 | 0.54461 |
| 1.076 | 0.43138 | 0.40979 | 0.40663 | 1.076 | 0.39427 | 0.35151 | 0.47549 | 0.49255 | 1.076 | 0.46454 | 0.45667 | 0.56354 | 0.54868 |
| 1.08  | 0.43623 | 0.41485 | 0.4122  | 1.08  | 0.39949 | 0.35741 | 0.48029 | 0.49534 | 1.08  | 0.46969 | 0.46178 | 0.5681  | 0.55276 |
| 1.084 | 0.44137 | 0.42024 | 0.41824 | 1.084 | 0.40527 | 0.36404 | 0.48562 | 0.49845 | 1.084 | 0.47513 | 0.46716 | 0.57267 | 0.55751 |
| 1.088 | 0.44651 | 0.4258  | 0.42405 | 1.088 | 0.41086 | 0.37042 | 0.49068 | 0.50155 | 1.088 | 0.48057 | 0.47254 | 0.57758 | 0.56226 |
| 1.092 | 0.45164 | 0.43086 | 0.42985 | 1.092 | 0.41644 | 0.37657 | 0.49574 | 0.50466 | 1.092 | 0.48601 | 0.47765 | 0.5818  | 0.56736 |
| 1.096 | 0.45707 | 0.43659 | 0.43612 | 1.096 | 0.42241 | 0.38344 | 0.50133 | 0.50807 | 1.096 | 0.49173 | 0.4833  | 0.58671 | 0.57245 |
| 1.1   | 0.46249 | 0.44282 | 0.44263 | 1.1   | 0.42856 | 0.39032 | 0.50693 | 0.51149 | 1.1   | 0.49745 | 0.48895 | 0.59163 | 0.57789 |
| 1.104 | 0.4682  | 0.44872 | 0.44936 | 1.104 | 0.43489 | 0.3972  | 0.51279 | 0.51522 | 1.104 | 0.50346 | 0.49513 | 0.59654 | 0.58298 |
| 1.108 | 0.47391 | 0.45513 | 0.45586 | 1.108 | 0.4416  | 0.40481 | 0.51865 | 0.51894 | 1.108 | 0.50947 | 0.50078 | 0.60146 | 0.58841 |
| 1.112 | 0.4799  | 0.46187 | 0.46306 | 1.112 | 0.44831 | 0.41218 | 0.52504 | 0.52298 | 1.112 | 0.51577 | 0.50724 | 0.60673 | 0.59385 |
| 1.116 | 0.48647 | 0.46861 | 0.47049 | 1.116 | 0.45557 | 0.42004 | 0.5317  | 0.52733 | 1.116 | 0.52207 | 0.51369 | 0.61199 | 0.59996 |
| 1.12  | 0.49332 | 0.47586 | 0.47793 | 1.12  | 0.46284 | 0.4284  | 0.53863 | 0.53168 | 1.12  | 0.52893 | 0.52042 | 0.61726 | 0.60607 |
| 1.124 | 0.49989 | 0.48294 | 0.48536 | 1.124 | 0.4701  | 0.4365  | 0.54529 | 0.53602 | 1.124 | 0.53552 | 0.52714 | 0.62253 | 0.61185 |
| 1.128 | 0.50731 | 0.49052 | 0.49372 | 1.128 | 0.47793 | 0.44535 | 0.55248 | 0.54068 | 1.128 | 0.54267 | 0.53467 | 0.62815 | 0.6183  |
| 1.132 | 0.51473 | 0.49844 | 0.50185 | 1.132 | 0.48594 | 0.45419 | 0.55994 | 0.54565 | 1.132 | 0.54983 | 0.54193 | 0.63377 | 0.62509 |
| 1.136 | 0.52244 | 0.50636 | 0.51021 | 1.136 | 0.49433 | 0.46352 | 0.56793 | 0.55062 | 1.136 | 0.55755 | 0.54946 | 0.63938 | 0.63188 |
| 1.14  | 0.53043 | 0.51462 | 0.5188  | 1.14  | 0.50308 | 0.47286 | 0.57539 | 0.55528 | 1.14  | 0.56499 | 0.557   | 0.64535 | 0.63901 |
| 1.144 | 0.53899 | 0.52288 | 0.52786 | 1.144 | 0.51184 | 0.48244 | 0.58364 | 0.56087 | 1.144 | 0.57301 | 0.56507 | 0.65132 | 0.64614 |
| 1.148 | 0.54784 | 0.53147 | 0.53738 | 1.148 | 0.52097 | 0.49275 | 0.59217 | 0.56646 | 1.148 | 0.58159 | 0.5734  | 0.65764 | 0.65361 |
| 1.152 | 0.55698 | 0.54041 | 0.5469  | 1.152 | 0.53066 | 0.50307 | 0.60123 | 0.57236 | 1.152 | 0.59018 | 0.58201 | 0.66431 | 0.66109 |
| 1.156 | 0.5664  | 0.54984 | 0.55642 | 1.156 | 0.54016 | 0.51339 | 0.60948 | 0.57795 | 1.156 | 0.59876 | 0.59035 | 0.67099 | 0.66856 |
| 1.16  | 0.57667 | 0.55911 | 0.56664 | 1.16  | 0.55004 | 0.52444 | 0.61907 | 0.58416 | 1.16  | 0.60764 | 0.59949 | 0.67801 | 0.67671 |
| 1.164 | 0.58695 | 0.56923 | 0.57686 | 1.164 | 0.56028 | 0.53549 | 0.62813 | 0.59037 | 1.164 | 0.61708 | 0.60864 | 0.68503 | 0.68486 |
| 1.168 | 0.5978  | 0.57934 | 0.58708 | 1.168 | 0.57072 | 0.54679 | 0.63799 | 0.59627 | 1.168 | 0.62624 | 0.61805 | 0.6924  | 0.69301 |
| 1.172 | 0.60836 | 0.58962 | 0.59799 | 1.172 | 0.58134 | 0.55809 | 0.64784 | 0.6028  | 1.172 | 0.63597 | 0.62774 | 0.69978 | 0.7015  |
| 1.176 | 0.61978 | 0.60007 | 0.60914 | 1.176 | 0.59233 | 0.56988 | 0.65796 | 0.60901 | 1.176 | 0.64541 | 0.63769 | 0.7075  | 0.71033 |
| 1.18  | 0.63148 | 0.61085 | 0.62075 | 1.18  | 0.60351 | 0.58192 | 0.66862 | 0.61584 | 1.18  | 0.65572 | 0.64791 | 0.71523 | 0.7195  |
| 1.184 | 0.64375 | 0.62282 | 0.63306 | 1.184 | 0.61599 | 0.59494 | 0.67981 | 0.62298 | 1.184 | 0.66659 | 0.65894 | 0.72401 | 0.72934 |
| 1.188 | 0.65574 | 0.63361 | 0.64444 | 1.188 | 0.62736 | 0.60747 | 0.69046 | 0.6295  | 1.188 | 0.67718 | 0.66916 | 0.73173 | 0.73817 |
| 1.192 | 0.66859 | 0.64523 | 0.65675 | 1.192 | 0.63947 | 0.62049 | 0.70139 | 0.63634 | 1.192 | 0.68805 | 0.68019 | 0.74016 | 0.74768 |
| 1.196 | 0.68143 | 0.6567  | 0.66883 | 1.196 | 0.65195 | 0.63375 | 0.71231 | 0.64348 | 1.196 | 0.69893 | 0.69095 | 0.74894 | 0.75719 |
| 1.2   | 0.69428 | 0.66866 | 0.68114 | 1.2   | 0.66444 | 0.64652 | 0.72376 | 0.65    | 1.2   | 0.7098  | 0.70224 | 0.75772 | 0.76704 |
| 1.204 | 0.70712 | 0.68029 | 0.69344 | 1.204 | 0.67692 | 0.66003 | 0.73495 | 0.65683 | 1.204 | 0.72097 | 0.71354 | 0.76614 | 0.77621 |
| 1.208 | 0.72026 | 0.69276 | 0.70598 | 1.208 | 0.68978 | 0.67354 | 0.7464  | 0.66398 | 1.208 | 0.73184 | 0.72484 | 0.77527 | 0.78606 |
| 1.212 | 0.73396 | 0.70506 | 0.71899 | 1.212 | 0.70301 | 0.6873  | 0.75812 | 0.67112 | 1.212 | 0.74358 | 0.73694 | 0.78475 | 0.79624 |
| 1.216 | 0.74766 | 0.71804 | 0.732   | 1.216 | 0.71642 | 0.70081 | 0.77011 | 0.67826 | 1.216 | 0.75502 | 0.74824 | 0.79423 | 0.80609 |
| 1.22  | 0.76079 | 0.72967 | 0.74454 | 1.22  | 0.72946 | 0.71457 | 0.78157 | 0.68509 | 1.22  | 0.76647 | 0.7598  | 0.80336 | 0.8156  |
| 1.224 | 0.77478 | 0.74265 | 0.75754 | 1.224 | 0.74325 | 0.72906 | 0.79355 | 0.69224 | 1.224 | 0.77849 | 0.77191 | 0.81355 | 0.82579 |
| 1.228 | 0.78819 | 0.75579 | 0.77032 | 1.228 | 0.75704 | 0.74331 | 0.80581 | 0.69969 | 1.228 | 0.78994 | 0.78401 | 0.82303 | 0.83598 |
| 1.232 | 0.80161 | 0.76894 | 0.78379 | 1.232 | 0.77101 | 0.75731 | 0.81753 | 0.70652 | 1.232 | 0.80167 | 0.79612 | 0.83286 | 0.84616 |
| 1.236 | 0.81474 | 0.78107 | 0.79656 | 1.236 | 0.78443 | 0.77106 | 0.82898 | 0.71304 | 1.236 | 0.81312 | 0.80795 | 0.84234 | 0.85533 |
| 1.24  | 0.82787 | 0.79388 | 0.80933 | 1.24  | 0.79822 | 0.78531 | 0.8407  | 0.71957 | 1.24  | 0.82485 | 0.81979 | 0.85217 | 0.86518 |
| 1.244 | 0.841   | 0.80753 | 0.82257 | 1.244 | 0.812   | 0.79956 | 0.85242 | 0.7264  | 1.244 | 0.83687 | 0.83189 | 0.862   | 0.87503 |
| 1.248 | 0.85442 | 0.82068 | 0.83581 | 1.248 | 0.82616 | 0.81405 | 0.86414 | 0.73323 | 1.248 | 0.84889 | 0.84399 | 0.87254 | 0.88488 |
| 1.252 | 0.86641 | 0.83416 | 0.84835 | 1.252 | 0.83995 | 0.82781 | 0.87507 | 0.73975 | 1.252 | 0.86034 | 0.85583 | 0.88202 | 0.89405 |
| 1.256 | 0.87897 | 0.8468  | 0.86159 | 1.256 | 0.85392 | 0.84205 | 0.88652 | 0.74658 | 1.256 | 0.87236 | 0.8682  | 0.8922  | 0.9039  |
| 1.26  | 0.89124 | 0.86096 | 0.87482 | 1.26  | 0.86771 | 0.85655 | 0.89798 | 0.75311 | 1.26  | 0.88409 | 0.88031 | 0.90238 | 0.91306 |
| 1.264 | 0.90323 | 0.87461 | 0.88736 | 1.264 | 0.88131 | 0.87104 | 0.90916 | 0.75963 | 1.264 | 0.89554 | 0.89241 | 0.91257 | 0.92223 |
| 1.268 | 0.91436 | 0.88759 | 0.90014 | 1.268 | 0.89473 | 0.88504 | 0.91955 | 0.76584 | 1.268 | 0.90699 | 0.90424 | 0.92275 | 0.93106 |
| 1.272 | 0.92578 | 0.90073 | 0.91221 | 1.272 | 0.90833 | 0.8988  | 0.93021 | 0.77205 | 1.272 | 0.91844 | 0.91635 | 0.93    |         |

|       |          |          |           |       |          |          |          |          |       |          |          |          |          |
|-------|----------|----------|-----------|-------|----------|----------|----------|----------|-------|----------|----------|----------|----------|
| 0.06  | 0.08425  | 0.02445  | 0.0813    | 0.06  | 0.03378  | 0.08216  | 0.02602  | 0.02639  | 0.06  | 0.02928  | 0.03476  | 0.01798  | 0.01567  |
| 0.064 | 0.08232  | 0.02291  | 0.07902   | 0.064 | 0.03233  | 0.07988  | 0.02576  | 0.02539  | 0.064 | 0.02824  | 0.03321  | 0.01693  | 0.01466  |
| 0.068 | 0.08056  | 0.02157  | 0.077     | 0.068 | 0.03079  | 0.0778   | 0.02545  | 0.02451  | 0.068 | 0.02717  | 0.0317   | 0.01582  | 0.01365  |
| 0.072 | 0.07879  | 0.02042  | 0.07523   | 0.072 | 0.02942  | 0.07552  | 0.02522  | 0.02353  | 0.072 | 0.02613  | 0.03058  | 0.0148   | 0.0127   |
| 0.076 | 0.07703  | 0.01927  | 0.0732    | 0.076 | 0.02828  | 0.07344  | 0.02468  | 0.02266  | 0.076 | 0.02516  | 0.029    | 0.01382  | 0.0118   |
| 0.08  | 0.0751   | 0.01793  | 0.07118   | 0.08  | 0.02695  | 0.07137  | 0.0243   | 0.02178  | 0.08  | 0.02412  | 0.02771  | 0.01277  | 0.01102  |
| 0.084 | 0.07328  | 0.01694  | 0.06916   | 0.084 | 0.02569  | 0.06929  | 0.02383  | 0.02091  | 0.084 | 0.02311  | 0.02642  | 0.01178  | 0.01013  |
| 0.088 | 0.07148  | 0.01571  | 0.06739   | 0.088 | 0.02441  | 0.06722  | 0.02325  | 0.02006  | 0.088 | 0.02209  | 0.02516  | 0.01083  | 0.00932  |
| 0.092 | 0.06955  | 0.01471  | 0.06536   | 0.092 | 0.02324  | 0.06515  | 0.02281  | 0.01913  | 0.092 | 0.02116  | 0.02395  | 0.00994  | 0.00863  |
| 0.096 | 0.06782  | 0.01368  | 0.06334   | 0.096 | 0.02212  | 0.06328  | 0.02224  | 0.01839  | 0.096 | 0.0202   | 0.02277  | 0.00905  | 0.00785  |
| 0.1   | 0.06583  | 0.0127   | 0.06157   | 0.1   | 0.02079  | 0.0612   | 0.02141  | 0.01752  | 0.1   | 0.01926  | 0.02168  | 0.00813  | 0.00716  |
| 0.104 | 0.06391  | 0.01167  | 0.05954   | 0.104 | 0.01977  | 0.05934  | 0.02097  | 0.01667  | 0.104 | 0.0183   | 0.02041  | 0.0074   | 0.00661  |
| 0.108 | 0.06201  | 0.01065  | 0.05777   | 0.108 | 0.01853  | 0.05726  | 0.02033  | 0.01587  | 0.108 | 0.01743  | 0.01934  | 0.00657  | 0.00594  |
| 0.112 | 0.05993  | 0.00985  | 0.0555    | 0.112 | 0.01748  | 0.05519  | 0.01979  | 0.01518  | 0.112 | 0.01649  | 0.01819  | 0.00578  | 0.0054   |
| 0.116 | 0.058    | 0.009    | 0.05347   | 0.116 | 0.01641  | 0.05332  | 0.01909  | 0.01436  | 0.116 | 0.01561  | 0.01713  | 0.00505  | 0.00488  |
| 0.12  | 0.05602  | 0.00816  | 0.0517    | 0.12  | 0.01541  | 0.05124  | 0.01842  | 0.01359  | 0.12  | 0.01463  | 0.0162   | 0.00422  | 0.00433  |
| 0.124 | 0.05399  | 0.0073   | 0.04968   | 0.124 | 0.01443  | 0.04938  | 0.01785  | 0.01293  | 0.124 | 0.01389  | 0.01513  | 0.00372  | 0.00381  |
| 0.128 | 0.05201  | 0.00646  | 0.04766   | 0.128 | 0.01343  | 0.0473   | 0.017    | 0.01216  | 0.128 | 0.01304  | 0.01432  | 0.00324  | 0.00349  |
| 0.132 | 0.04992  | 0.00584  | 0.04588   | 0.132 | 0.01252  | 0.04544  | 0.01639  | 0.01153  | 0.132 | 0.01218  | 0.01314  | 0.00264  | 0.00297  |
| 0.136 | 0.04806  | 0.00504  | 0.04361   | 0.136 | 0.01166  | 0.04336  | 0.01569  | 0.01079  | 0.136 | 0.01142  | 0.01238  | 0.00219  | 0.00254  |
| 0.14  | 0.04581  | 0.00435  | 0.04184   | 0.14  | 0.01068  | 0.04129  | 0.01509  | 0.01012  | 0.14  | 0.01059  | 0.01146  | 0.00175  | 0.00225  |
| 0.144 | 0.04363  | 0.00372  | 0.03956   | 0.144 | 0.00981  | 0.03942  | 0.01442  | 0.00943  | 0.144 | 0.0098   | 0.0105   | 0.00133  | 0.0019   |
| 0.148 | 0.04167  | 0.00312  | 0.03754   | 0.148 | 0.00888  | 0.03755  | 0.01366  | 0.00882  | 0.148 | 0.00903  | 0.0096   | 0.00105  | 0.00162  |
| 0.152 | 0.03946  | 0.00253  | 0.03526   | 0.152 | 0.00811  | 0.03548  | 0.01274  | 0.00811  | 0.152 | 0.00829  | 0.00862  | 6.67E-04 | 0.00121  |
| 0.156 | 0.03738  | 0.00216  | 0.03324   | 0.156 | 0.0072   | 0.03361  | 0.0121   | 0.00739  | 0.156 | 0.00768  | 0.00783  | 5.72E-04 | 0.00104  |
| 0.16  | 0.03532  | 0.00165  | 0.03121   | 0.16  | 0.0065   | 0.03174  | 0.01137  | 0.00673  | 0.16  | 0.00692  | 0.00682  | 2.86E-04 | 7.50E-04 |
| 0.164 | 0.03317  | 0.00126  | 0.02894   | 0.164 | 0.00569  | 0.02967  | 0.01058  | 0.00602  | 0.164 | 0.00628  | 0.00606  | 1.91E-04 | 4.62E-04 |
| 0.168 | 0.03099  | 8.81E-04 | 0.02717   | 0.168 | 0.0049   | 0.02759  | 0.00982  | 0.00535  | 0.168 | 0.0056   | 0.00517  | 3.18E-05 | 2.60E-04 |
| 0.172 | 0.02894  | 5.94E-04 | 0.02489   | 0.172 | 0.00415  | 0.02573  | 0.00899  | 0.00477  | 0.172 | 0.00494  | 0.00432  | 6.35E-05 | 1.15E-04 |
| 0.176 | 0.02682  | 2.49E-04 | 0.02287   | 0.176 | 0.00343  | 0.02365  | 0.00813  | 0.00411  | 0.176 | 0.00428  | 0.00359  | 0        | 0        |
| 0.18  | 0.02474  | 3.83E-05 | 0.02059   | 0.18  | 0.0028   | 0.02158  | 0.00731  | 0.00342  | 0.18  | 0.00368  | 0.00278  | 3.18E-04 | 2.89E-05 |
| 0.184 | 0.02252  | 3.83E-05 | 0.01831   | 0.184 | 0.00217  | 0.01971  | 0.00661  | 0.00278  | 0.184 | 0.00299  | 0.00208  | 4.13E-04 | 2.89E-05 |
| 0.188 | 0.0206   | 0        | 0.01637   | 0.188 | 0.00168  | 0.01784  | 0.00562  | 0.00223  | 0.188 | 0.00252  | 0.0014   | 7.62E-04 | 2.02E-04 |
| 0.192 | 0.01864  | 1.15E-04 | 0.01434   | 0.192 | 0.00107  | 0.01598  | 0.0048   | 0.00167  | 0.192 | 0.002    | 8.42E-04 | 0.00124  | 5.48E-04 |
| 0.196 | 0.01675  | 4.02E-04 | 0.01237   | 0.196 | 6.29E-04 | 0.01369  | 0.00384  | 0.00119  | 0.196 | 0.00143  | 4.49E-04 | 0.00181  | 9.23E-04 |
| 0.2   | 0.01495  | 8.05E-04 | 0.01052   | 0.2   | 2.80E-04 | 0.01203  | 0.00318  | 7.68E-04 | 0.2   | 0.0011   | 0        | 0.00267  | 0.0017   |
| 0.204 | 0.01322  | 0.00149  | 0.0088    | 0.204 | 9.32E-05 | 0.01017  | 0.00245  | 3.97E-04 | 0.204 | 6.59E-04 | 1.12E-04 | 0.00359  | 0.00242  |
| 0.208 | 0.01152  | 0.00241  | 0.00698   | 0.208 | 0        | 0.00851  | 0.00165  | 1.85E-04 | 0.208 | 3.84E-04 | 5.62E-05 | 0.00489  | 0.00349  |
| 0.212 | 0.00975  | 0.00356  | 0.00536   | 0.212 | 2.33E-05 | 0.00705  | 0.00105  | 2.65E-05 | 0.212 | 2.47E-04 | 2.53E-04 | 0.00616  | 0.00473  |
| 0.216 | 0.00821  | 0.00508  | 0.00382   | 0.216 | 4.66E-05 | 0.00539  | 5.72E-04 | 0        | 0.216 | 0        | 7.86E-04 | 0.00791  | 0.00632  |
| 0.22  | 0.00677  | 0.00682  | 0.00273   | 0.22  | 5.13E-04 | 0.00415  | 1.91E-04 | 7.95E-05 | 0.22  | 1.65E-04 | 0.0018   | 0.01     | 0.00834  |
| 0.224 | 0.00552  | 0.00889  | 0.00159   | 0.224 | 0.00107  | 0.00311  | 6.35E-05 | 5.30E-04 | 0.224 | 2.74E-04 | 0.00292  | 0.01248  | 0.01059  |
| 0.228 | 0.00423  | 0.01138  | 7.84E-04  | 0.228 | 0.00191  | 0.00187  | 0        | 0.00101  | 0.228 | 4.67E-04 | 0.00463  | 0.01537  | 0.0133   |
| 0.232 | 0.00327  | 0.01456  | 1.77E-04  | 0.232 | 0.00308  | 0.00104  | 1.27E-04 | 0.00172  | 0.232 | 9.88E-04 | 0.00682  | 0.01883  | 0.01659  |
| 0.236 | 0.00237  | 0.01812  | 7.59E-05  | 0.236 | 0.00455  | 6.22E-04 | 5.72E-04 | 0.00278  | 0.236 | 0.00173  | 0.00963  | 0.02287  | 0.02051  |
| 0.24  | 0.00141  | 0.02215  | 0         | 0.24  | 0.00627  | 2.07E-04 | 0.00149  | 0.00424  | 0.24  | 0.0025   | 0.01311  | 0.02766  | 0.02507  |
| 0.244 | 8.02E-04 | 0.02675  | 4.55E-04  | 0.244 | 0.00839  | 0        | 0.00257  | 0.00599  | 0.244 | 0.00357  | 0.01735  | 0.03332  | 0.0305   |
| 0.248 | 2.89E-04 | 0.03192  | 0.00132   | 0.248 | 0.01091  | 0        | 0.00397  | 0.00821  | 0.248 | 0.00502  | 0.02241  | 0.04005  | 0.03679  |
| 0.252 | 6.42E-05 | 0.03767  | 0.00283   | 0.252 | 0.01392  | 4.15E-04 | 0.00591  | 0.01105  | 0.252 | 0.00683  | 0.02881  | 0.04786  | 0.04417  |
| 0.256 | 0        | 0.04418  | 0.00488   | 0.256 | 0.01755  | 0.00124  | 0.00848  | 0.01442  | 0.256 | 0.00889  | 0.03627  | 0.05717  | 0.05283  |
| 0.26  | 9.62E-05 | 0.05089  | 0.00739   | 0.26  | 0.02156  | 0.00228  | 0.01166  | 0.01818  | 0.26  | 0.01147  | 0.04503  | 0.06803  | 0.06287  |
| 0.264 | 5.13E-04 | 0.05817  | 0.01067   | 0.264 | 0.02632  | 0.00373  | 0.01557  | 0.023    | 0.264 | 0.01446  | 0.05545  | 0.08064  | 0.07467  |
| 0.268 | 9.95E-04 | 0.06602  | 0.01472   | 0.268 | 0.03154  | 0.00539  | 0.02033  | 0.02854  | 0.268 | 0.01789  | 0.06736  | 0.09518  | 0.08832  |
| 0.272 | 0.00176  | 0.07368  | 0.01933   | 0.272 | 0.03725  | 0.00768  | 0.02608  | 0.03501  | 0.272 | 0.02179  | 0.08092  | 0.11211  | 0.1039   |
| 0.276 | 0.00311  | 0.08173  | 0.02464   | 0.276 | 0.04355  | 0.00996  | 0.03282  | 0.04216  | 0.276 | 0.02626  | 0.09588  | 0.13091  | 0.1215   |
| 0.28  | 0.00417  | 0.08978  | 0.03071   | 0.28  | 0.05038  | 0.01266  | 0.04076  | 0.05038  | 0.28  | 0.03131  | 0.11247  | 0.15178  | 0.14135  |
| 0.284 | 0.00565  | 0.09763  | 0.03779   | 0.284 | 0.05765  | 0.01598  | 0.04965  | 0.05957  | 0.284 | 0.03691  | 0.13019  | 0.17423  | 0.16325  |
| 0.288 | 0.00767  | 0.10491  | 0.04487   | 0.288 | 0.06513  | 0.01909  | 0.05963  | 0.06948  | 0.288 | 0.04297  | 0.14872  | 0.19776  | 0.18691  |
| 0.292 | 0.00966  | 0.11181  | 0.05246   | 0.292 | 0.07245  | 0.02241  | 0.07021  | 0.07987  | 0.292 | 0.04931  | 0.16669  | 0.22095  | 0.21175  |
| 0.296 | 0.012    | 0.11794  | 0.0603    | 0.296 | 0.07991  | 0.02552  | 0.0812   | 0.0905   | 0.296 | 0.05582  | 0.18354  | 0.24254  | 0.23685  |
| 0.3   | 0.01473  | 0.1233   | 0.06739   | 0.3   | 0.0869   | 0.02863  | 0.09181  | 0.10094  | 0.3   | 0.06246  | 0.19814  | 0.26096  | 0.26138  |
| 0.304 | 0.01742  | 0.1279   | 0.07396   | 0.304 | 0.09273  | 0.03112  | 0.10121  | 0.11029  | 0.304 | 0.0685   | 0.20937  | 0.2743   | 0.2833   |
| 0.308 | 0.02034  | 0.13173  | 0.07927   | 0.308 | 0.09763  | 0.0332   | 0.10852  | 0.11819  | 0.308 | 0.07387  | 0.2161   | 0.28129  | 0.30119  |
| 0.312 | 0.02339  | 0.13518  | 0.08332   | 0.312 | 0.10112  | 0.03465  | 0.11306  | 0.12378  | 0.312 | 0.07805  | 0.21779  | 0.28066  | 0.31302  |
| 0.316 | 0.02663  | 0.13863  | 0.08585   | 0.316 | 0.10345  | 0.03568  | 0.11423  | 0.1268   | 0.316 | 0.08112  | 0.21498  | 0.27272  | 0.31821  |
| 0.32  | 0.03009  | 0.14227  | 0.08686   | 0.32  | 0.10462  | 0.0361   | 0.11239  | 0.12693  | 0.32  | 0.0826   | 0.20796  | 0.25906  | 0.31533  |
| 0.324 | 0.03362  | 0.14649  | 0.08661   | 0.324 | 0.10462  | 0.0361   | 0.10801  | 0.12463  | 0.324 | 0.08285  | 0.19785  | 0.24096  | 0.30465  |
| 0.328 | 0.03744  | 0.15204  | 0.08585   | 0.328 | 0.10415  | 0.03672  | 0.10251  | 0.12026  | 0.328 | 0.08241  | 0.18634  | 0.2219   | 0.28821  |
| 0.332 | 0.04167  | 0.15875  | 0.08484   | 0.332 | 0.10345  | 0.03714  | 0.09711  | 0.11498  | 0.332 | 0.08159  | 0.17511  | 0.2038   | 0.26859  |
| 0.336 | 0.04633  | 0.16699  | 0.08383   | 0.336 | 0.10345  | 0.03797  | 0.09276  | 0.10952  | 0.336 | 0.08071  | 0.16444  | 0.18792  | 0.24781  |
| 0.34  | 0.05156  | 0.17676  | 0.08357   | 0.34  | 0.10392  | 0.03942  | 0.09009  | 0.10467  | 0.34  | 0.0803   | 0.15574  | 0.17544  | 0.22935  |
| 0.344 | 0.05739  | 0.18825  | 0.08383   | 0.344 | 0.10509  | 0.04129  | 0.08911  | 0.10099  | 0.344 | 0.08052  | 0.14956  | 0.1662   | 0.21463  |
| 0.348 | 0.06394  | 0.20147  | 0.08509   | 0.348 | 0.10765  | 0.04419  | 0.08996  | 0.09903  | 0.348 | 0.08156  | 0.14591  | 0.16035  | 0.20454  |
| 0.352 | 0.07145  | 0.21603  | 0.08737   | 0.352 | 0.11138  | 0.04772  | 0.09235  | 0.09874  | 0.352 | 0.08353  | 0.14451  | 0.15746  | 0.19877  |
| 0.356 | 0.07982  | 0.23117  | 0.09116   | 0.356 | 0.11628  | 0.05207  | 0.09629  | 0.09993  | 0.356 | 0.08622  | 0.14591  | 0.1573   | 0.19732  |
| 0.36  | 0.08916  | 0.24726  | 0.09597</ |       |          |          |          |          |       |          |          |          |          |

|       |         |         |         |       |         |         |         |         |       |         |         |         |         |
|-------|---------|---------|---------|-------|---------|---------|---------|---------|-------|---------|---------|---------|---------|
| 0.472 | 0.15688 | 0.24918 | 0.17615 | 0.472 | 0.17502 | 0.07282 | 0.21789 | 0.16022 | 0.472 | 0.15176 | 0.22481 | 0.22063 | 0.2533  |
| 0.476 | 0.15399 | 0.24611 | 0.17438 | 0.476 | 0.17362 | 0.06971 | 0.21757 | 0.15916 | 0.476 | 0.14929 | 0.22397 | 0.22031 | 0.25445 |
| 0.48  | 0.15175 | 0.24305 | 0.17337 | 0.48  | 0.17269 | 0.06701 | 0.21821 | 0.15836 | 0.48  | 0.14715 | 0.2234  | 0.22063 | 0.2556  |
| 0.484 | 0.14982 | 0.24036 | 0.17211 | 0.484 | 0.17199 | 0.06452 | 0.21884 | 0.15757 | 0.484 | 0.14498 | 0.22284 | 0.22063 | 0.25705 |
| 0.488 | 0.14822 | 0.23787 | 0.17135 | 0.488 | 0.17129 | 0.06224 | 0.21948 | 0.15704 | 0.488 | 0.14328 | 0.22256 | 0.22127 | 0.25849 |
| 0.492 | 0.14726 | 0.23557 | 0.17109 | 0.492 | 0.17129 | 0.06037 | 0.22107 | 0.15651 | 0.492 | 0.14171 | 0.22256 | 0.22222 | 0.2608  |
| 0.496 | 0.14662 | 0.23308 | 0.17084 | 0.496 | 0.17129 | 0.05851 | 0.22202 | 0.15651 | 0.496 | 0.14031 | 0.22256 | 0.22285 | 0.26253 |
| 0.5   | 0.14597 | 0.23098 | 0.17084 | 0.5   | 0.17152 | 0.05685 | 0.22361 | 0.15624 | 0.5   | 0.13913 | 0.22256 | 0.22381 | 0.26484 |
| 0.504 | 0.14597 | 0.22887 | 0.17084 | 0.504 | 0.17222 | 0.05539 | 0.22488 | 0.15595 | 0.504 | 0.13834 | 0.22284 | 0.22444 | 0.26715 |
| 0.508 | 0.14629 | 0.22695 | 0.17135 | 0.508 | 0.17292 | 0.05415 | 0.22647 | 0.15598 | 0.508 | 0.13768 | 0.22369 | 0.22571 | 0.26945 |
| 0.512 | 0.14662 | 0.22504 | 0.1716  | 0.512 | 0.17385 | 0.05311 | 0.22806 | 0.15598 | 0.512 | 0.13713 | 0.22425 | 0.22698 | 0.27205 |
| 0.516 | 0.14694 | 0.22293 | 0.17185 | 0.516 | 0.17455 | 0.05207 | 0.22965 | 0.15598 | 0.516 | 0.1368  | 0.22481 | 0.22794 | 0.27407 |
| 0.52  | 0.1479  | 0.2212  | 0.17236 | 0.52  | 0.17572 | 0.05124 | 0.23155 | 0.15598 | 0.52  | 0.13683 | 0.22565 | 0.22952 | 0.27638 |
| 0.524 | 0.14854 | 0.21967 | 0.17286 | 0.524 | 0.17688 | 0.05062 | 0.23314 | 0.15624 | 0.524 | 0.13705 | 0.22649 | 0.23079 | 0.2784  |
| 0.528 | 0.1495  | 0.21814 | 0.17362 | 0.528 | 0.17828 | 0.04979 | 0.23505 | 0.15651 | 0.528 | 0.1374  | 0.22734 | 0.2327  | 0.28071 |
| 0.532 | 0.15047 | 0.21642 | 0.17413 | 0.532 | 0.17968 | 0.04938 | 0.23663 | 0.15677 | 0.532 | 0.13787 | 0.22874 | 0.23429 | 0.28301 |
| 0.536 | 0.15175 | 0.21488 | 0.17489 | 0.536 | 0.18108 | 0.04896 | 0.23854 | 0.15704 | 0.536 | 0.13864 | 0.23014 | 0.23619 | 0.28503 |
| 0.54  | 0.15303 | 0.21373 | 0.17565 | 0.54  | 0.18271 | 0.04855 | 0.24013 | 0.15757 | 0.54  | 0.1396  | 0.23155 | 0.2381  | 0.28734 |
| 0.544 | 0.15432 | 0.21258 | 0.17615 | 0.544 | 0.18434 | 0.04834 | 0.24172 | 0.1581  | 0.544 | 0.1407  | 0.23323 | 0.24032 | 0.28965 |
| 0.548 | 0.1556  | 0.21143 | 0.17716 | 0.548 | 0.18621 | 0.04813 | 0.24331 | 0.15863 | 0.548 | 0.1419  | 0.23492 | 0.24223 | 0.29167 |
| 0.552 | 0.1572  | 0.21067 | 0.17792 | 0.552 | 0.18784 | 0.04813 | 0.24521 | 0.15942 | 0.552 | 0.14317 | 0.23688 | 0.24445 | 0.29398 |
| 0.556 | 0.15881 | 0.2099  | 0.17893 | 0.556 | 0.18994 | 0.04834 | 0.24712 | 0.16022 | 0.556 | 0.14476 | 0.23913 | 0.24667 | 0.29658 |
| 0.56  | 0.16009 | 0.20933 | 0.17995 | 0.56  | 0.1918  | 0.04834 | 0.24871 | 0.16128 | 0.56  | 0.14638 | 0.24137 | 0.2489  | 0.29888 |
| 0.564 | 0.16169 | 0.20875 | 0.18071 | 0.564 | 0.1939  | 0.04855 | 0.24998 | 0.16234 | 0.564 | 0.14805 | 0.24334 | 0.25112 | 0.30119 |
| 0.568 | 0.1633  | 0.20837 | 0.18197 | 0.568 | 0.196   | 0.04876 | 0.25188 | 0.1634  | 0.568 | 0.14984 | 0.24587 | 0.25366 | 0.3035  |
| 0.572 | 0.1649  | 0.20837 | 0.18323 | 0.572 | 0.19833 | 0.04938 | 0.25347 | 0.16472 | 0.572 | 0.15176 | 0.24839 | 0.25652 | 0.30639 |
| 0.576 | 0.16651 | 0.20837 | 0.18399 | 0.576 | 0.20043 | 0.05    | 0.25506 | 0.16605 | 0.576 | 0.15368 | 0.25064 | 0.25906 | 0.30898 |
| 0.58  | 0.16811 | 0.20818 | 0.18526 | 0.58  | 0.20253 | 0.05041 | 0.25633 | 0.16737 | 0.58  | 0.1556  | 0.25317 | 0.2616  | 0.31158 |
| 0.584 | 0.17004 | 0.20837 | 0.18627 | 0.584 | 0.20486 | 0.05083 | 0.25824 | 0.16896 | 0.584 | 0.15752 | 0.25597 | 0.26414 | 0.31418 |
| 0.588 | 0.17164 | 0.20856 | 0.18779 | 0.588 | 0.20719 | 0.05166 | 0.25982 | 0.17055 | 0.588 | 0.15971 | 0.2585  | 0.267   | 0.31677 |
| 0.592 | 0.17356 | 0.20894 | 0.1888  | 0.592 | 0.20929 | 0.05228 | 0.26173 | 0.17214 | 0.592 | 0.16191 | 0.26131 | 0.26986 | 0.31937 |
| 0.596 | 0.17517 | 0.20913 | 0.19032 | 0.596 | 0.21162 | 0.05311 | 0.26332 | 0.17373 | 0.596 | 0.16411 | 0.26412 | 0.2724  | 0.32197 |
| 0.6   | 0.17709 | 0.20971 | 0.19158 | 0.6   | 0.21395 | 0.05394 | 0.26522 | 0.17559 | 0.6   | 0.1663  | 0.26692 | 0.27526 | 0.32427 |
| 0.604 | 0.17902 | 0.21028 | 0.19335 | 0.604 | 0.21628 | 0.05477 | 0.26713 | 0.17744 | 0.604 | 0.1685  | 0.26973 | 0.27811 | 0.32687 |
| 0.608 | 0.18094 | 0.21105 | 0.19462 | 0.608 | 0.21838 | 0.05581 | 0.26904 | 0.1793  | 0.608 | 0.17069 | 0.27254 | 0.28129 | 0.32947 |
| 0.612 | 0.18255 | 0.21163 | 0.19613 | 0.612 | 0.22048 | 0.05664 | 0.27094 | 0.18115 | 0.612 | 0.17289 | 0.27507 | 0.28415 | 0.33149 |
| 0.616 | 0.18415 | 0.21239 | 0.1974  | 0.616 | 0.22281 | 0.05768 | 0.27317 | 0.18301 | 0.616 | 0.17536 | 0.27815 | 0.28701 | 0.33379 |
| 0.62  | 0.18576 | 0.21316 | 0.19917 | 0.62  | 0.22491 | 0.05892 | 0.27507 | 0.18486 | 0.62  | 0.17783 | 0.28096 | 0.29018 | 0.3361  |
| 0.624 | 0.18736 | 0.21431 | 0.20094 | 0.624 | 0.227   | 0.05996 | 0.2773  | 0.18698 | 0.624 | 0.17975 | 0.28377 | 0.29336 | 0.33812 |
| 0.628 | 0.18864 | 0.21507 | 0.20246 | 0.628 | 0.2291  | 0.061   | 0.27952 | 0.18884 | 0.628 | 0.18194 | 0.28658 | 0.29622 | 0.34014 |
| 0.632 | 0.18993 | 0.21603 | 0.20398 | 0.632 | 0.2312  | 0.06224 | 0.28143 | 0.19096 | 0.632 | 0.18414 | 0.28938 | 0.29939 | 0.34187 |
| 0.636 | 0.19121 | 0.21718 | 0.206   | 0.636 | 0.2333  | 0.06349 | 0.28365 | 0.19308 | 0.636 | 0.18661 | 0.29219 | 0.30257 | 0.34389 |
| 0.64  | 0.19217 | 0.21833 | 0.20752 | 0.64  | 0.23493 | 0.06473 | 0.28587 | 0.1952  | 0.64  | 0.18853 | 0.295   | 0.30575 | 0.34562 |
| 0.644 | 0.19346 | 0.21929 | 0.20929 | 0.644 | 0.23679 | 0.06577 | 0.28778 | 0.19732 | 0.644 | 0.19045 | 0.29753 | 0.3086  | 0.34736 |
| 0.648 | 0.19442 | 0.22063 | 0.21131 | 0.648 | 0.23866 | 0.06722 | 0.28969 | 0.19944 | 0.648 | 0.19237 | 0.30005 | 0.31178 | 0.34938 |
| 0.652 | 0.19538 | 0.22197 | 0.21283 | 0.652 | 0.24052 | 0.06867 | 0.29159 | 0.20129 | 0.652 | 0.19429 | 0.30286 | 0.31496 | 0.35111 |
| 0.656 | 0.19634 | 0.22331 | 0.2146  | 0.656 | 0.24216 | 0.06992 | 0.2935  | 0.20341 | 0.656 | 0.19649 | 0.30539 | 0.31813 | 0.35313 |
| 0.66  | 0.19698 | 0.22484 | 0.21637 | 0.66  | 0.24355 | 0.07116 | 0.2954  | 0.20553 | 0.66  | 0.19813 | 0.30791 | 0.32099 | 0.35486 |
| 0.664 | 0.19763 | 0.22619 | 0.21814 | 0.664 | 0.24495 | 0.07282 | 0.29699 | 0.20739 | 0.664 | 0.19978 | 0.31016 | 0.32417 | 0.35659 |
| 0.668 | 0.19827 | 0.22772 | 0.22016 | 0.668 | 0.24635 | 0.07427 | 0.2989  | 0.20924 | 0.668 | 0.2017  | 0.31241 | 0.32734 | 0.35861 |
| 0.672 | 0.19923 | 0.22944 | 0.22219 | 0.672 | 0.24775 | 0.07573 | 0.30049 | 0.21163 | 0.672 | 0.20362 | 0.31465 | 0.3302  | 0.36063 |
| 0.676 | 0.19987 | 0.23098 | 0.22396 | 0.676 | 0.24868 | 0.07739 | 0.30176 | 0.21322 | 0.676 | 0.20527 | 0.31662 | 0.33306 | 0.36236 |
| 0.68  | 0.20051 | 0.2327  | 0.22573 | 0.68  | 0.24985 | 0.07905 | 0.30335 | 0.21534 | 0.68  | 0.20692 | 0.31886 | 0.3356  | 0.36438 |
| 0.684 | 0.20148 | 0.23442 | 0.2275  | 0.684 | 0.25101 | 0.08071 | 0.30462 | 0.21719 | 0.684 | 0.20856 | 0.32083 | 0.33846 | 0.36611 |
| 0.688 | 0.20212 | 0.23615 | 0.22927 | 0.688 | 0.25195 | 0.08237 | 0.30589 | 0.21905 | 0.688 | 0.21021 | 0.32251 | 0.341   | 0.36813 |
| 0.692 | 0.20308 | 0.23768 | 0.23129 | 0.692 | 0.25288 | 0.08423 | 0.30684 | 0.22064 | 0.692 | 0.21158 | 0.3242  | 0.34354 | 0.36986 |
| 0.696 | 0.20404 | 0.23941 | 0.23307 | 0.696 | 0.25381 | 0.08589 | 0.30811 | 0.22223 | 0.696 | 0.21323 | 0.3256  | 0.34576 | 0.37159 |
| 0.7   | 0.205   | 0.24113 | 0.23484 | 0.7   | 0.25474 | 0.08797 | 0.30938 | 0.22408 | 0.7   | 0.2146  | 0.32701 | 0.34767 | 0.37332 |
| 0.704 | 0.20597 | 0.24305 | 0.23661 | 0.704 | 0.25568 | 0.08983 | 0.31065 | 0.22567 | 0.704 | 0.21625 | 0.32869 | 0.34989 | 0.37477 |
| 0.708 | 0.20725 | 0.24477 | 0.23838 | 0.708 | 0.25638 | 0.09191 | 0.3116  | 0.22726 | 0.708 | 0.21762 | 0.32953 | 0.35148 | 0.3765  |
| 0.712 | 0.20853 | 0.24669 | 0.24015 | 0.712 | 0.25707 | 0.09378 | 0.31256 | 0.22885 | 0.712 | 0.21926 | 0.33094 | 0.35307 | 0.37794 |
| 0.716 | 0.20982 | 0.2486  | 0.24217 | 0.716 | 0.25801 | 0.09606 | 0.31383 | 0.23018 | 0.716 | 0.22064 | 0.33206 | 0.35465 | 0.37938 |
| 0.72  | 0.21142 | 0.25033 | 0.24369 | 0.72  | 0.25894 | 0.09834 | 0.3151  | 0.23177 | 0.72  | 0.22228 | 0.33318 | 0.35592 | 0.38054 |
| 0.724 | 0.21303 | 0.25224 | 0.24521 | 0.724 | 0.25964 | 0.10041 | 0.31605 | 0.23309 | 0.724 | 0.22366 | 0.33403 | 0.35688 | 0.3814  |
| 0.728 | 0.21463 | 0.25397 | 0.24698 | 0.728 | 0.26034 | 0.10249 | 0.31732 | 0.23442 | 0.728 | 0.2253  | 0.33487 | 0.35815 | 0.38227 |
| 0.732 | 0.21623 | 0.25607 | 0.24849 | 0.732 | 0.2615  | 0.10498 | 0.31859 | 0.23574 | 0.732 | 0.22695 | 0.33571 | 0.3591  | 0.38313 |
| 0.736 | 0.21816 | 0.25818 | 0.25052 | 0.736 | 0.26244 | 0.10768 | 0.31986 | 0.23707 | 0.736 | 0.22859 | 0.33711 | 0.36005 | 0.384   |
| 0.74  | 0.22008 | 0.2599  | 0.25153 | 0.74  | 0.26314 | 0.10996 | 0.32113 | 0.23839 | 0.74  | 0.23024 | 0.33768 | 0.36101 | 0.38458 |
| 0.744 | 0.22201 | 0.2622  | 0.2533  | 0.744 | 0.2643  | 0.11245 | 0.32241 | 0.23972 | 0.744 | 0.23189 | 0.3388  | 0.36164 | 0.38515 |
| 0.748 | 0.22425 | 0.2645  | 0.25507 | 0.748 | 0.26547 | 0.11494 | 0.32368 | 0.24104 | 0.748 | 0.23381 | 0.33964 | 0.36228 | 0.38573 |
| 0.752 | 0.2265  | 0.2668  | 0.25659 | 0.752 | 0.26663 | 0.11763 | 0.32495 | 0.24237 | 0.752 | 0.23546 | 0.34076 | 0.36323 | 0.38602 |
| 0.756 | 0.22875 | 0.2691  | 0.25811 | 0.756 | 0.26803 | 0.12012 | 0.32654 | 0.24369 | 0.756 | 0.23738 | 0.34189 | 0.36386 | 0.3866  |
| 0.76  | 0.23131 | 0.2714  | 0.25962 | 0.76  | 0.2692  | 0.12282 | 0.32781 | 0.24502 | 0.76  | 0.23902 | 0.34301 | 0.36418 | 0.38717 |
| 0.764 | 0.23388 | 0.27427 | 0.26114 | 0.764 | 0.2706  | 0.12531 | 0.32908 | 0.24661 | 0.764 | 0.24094 | 0.34441 | 0.36513 | 0.38775 |
| 0.768 | 0.23677 | 0.27676 | 0.26291 | 0.768 | 0.27199 | 0.12822 | 0.33035 | 0.24793 | 0.768 | 0.24286 | 0.34582 | 0.36577 | 0.38833 |
| 0.772 | 0.23901 | 0.27945 | 0.26443 | 0.772 |         |         |         |         |       |         |         |         |         |



|       |         |         |         |       |         |         |         |         |       |         |         |         |         |
|-------|---------|---------|---------|-------|---------|---------|---------|---------|-------|---------|---------|---------|---------|
| 0.884 | 0.3282  | 0.41701 | 0.35853 | 0.884 | 0.35731 | 0.24481 | 0.41993 | 0.33803 | 0.884 | 0.32876 | 0.44605 | 0.43437 | 0.46738 |
| 0.888 | 0.33205 | 0.42314 | 0.36409 | 0.888 | 0.36221 | 0.25062 | 0.42533 | 0.34333 | 0.888 | 0.33315 | 0.45195 | 0.43882 | 0.472   |
| 0.892 | 0.3359  | 0.42946 | 0.37016 | 0.892 | 0.36734 | 0.25643 | 0.43105 | 0.3489  | 0.892 | 0.33809 | 0.45812 | 0.44326 | 0.47719 |
| 0.896 | 0.33943 | 0.43559 | 0.37623 | 0.896 | 0.3727  | 0.26224 | 0.43645 | 0.35473 | 0.896 | 0.3433  | 0.4643  | 0.44803 | 0.48181 |
| 0.9   | 0.34328 | 0.44134 | 0.38205 | 0.9   | 0.37806 | 0.26784 | 0.44185 | 0.36003 | 0.9   | 0.34824 | 0.47076 | 0.45247 | 0.48642 |
| 0.904 | 0.34713 | 0.44728 | 0.38837 | 0.904 | 0.38365 | 0.27386 | 0.44725 | 0.36586 | 0.904 | 0.35346 | 0.47722 | 0.45724 | 0.49133 |
| 0.908 | 0.35162 | 0.45321 | 0.39445 | 0.908 | 0.38902 | 0.27967 | 0.45297 | 0.37142 | 0.908 | 0.35895 | 0.48395 | 0.46168 | 0.49623 |
| 0.912 | 0.35611 | 0.45896 | 0.40052 | 0.912 | 0.39484 | 0.28548 | 0.45837 | 0.37699 | 0.912 | 0.36443 | 0.49041 | 0.46645 | 0.50056 |
| 0.916 | 0.3606  | 0.46433 | 0.40659 | 0.916 | 0.40044 | 0.29149 | 0.46377 | 0.38255 | 0.916 | 0.36992 | 0.49687 | 0.47089 | 0.50518 |
| 0.92  | 0.36509 | 0.46969 | 0.41291 | 0.92  | 0.40627 | 0.29751 | 0.46885 | 0.38785 | 0.92  | 0.37569 | 0.50333 | 0.47566 | 0.50951 |
| 0.924 | 0.36991 | 0.47506 | 0.41923 | 0.924 | 0.41209 | 0.30394 | 0.47425 | 0.39315 | 0.924 | 0.38145 | 0.50978 | 0.4801  | 0.51383 |
| 0.928 | 0.37472 | 0.48023 | 0.4253  | 0.928 | 0.41792 | 0.31017 | 0.4787  | 0.39872 | 0.928 | 0.38721 | 0.51596 | 0.48455 | 0.51816 |
| 0.932 | 0.37985 | 0.48502 | 0.43112 | 0.932 | 0.42352 | 0.31639 | 0.48347 | 0.40349 | 0.932 | 0.39243 | 0.52186 | 0.48868 | 0.5222  |
| 0.936 | 0.38499 | 0.48981 | 0.43719 | 0.936 | 0.42911 | 0.32282 | 0.48823 | 0.40879 | 0.936 | 0.39846 | 0.52803 | 0.49312 | 0.52624 |
| 0.94  | 0.39044 | 0.4946  | 0.44326 | 0.94  | 0.43471 | 0.32905 | 0.493   | 0.41382 | 0.94  | 0.40423 | 0.53393 | 0.49725 | 0.53028 |
| 0.944 | 0.39557 | 0.499   | 0.44908 | 0.944 | 0.44007 | 0.33506 | 0.49744 | 0.41886 | 0.944 | 0.40971 | 0.53955 | 0.50138 | 0.53403 |
| 0.948 | 0.40071 | 0.50303 | 0.45414 | 0.948 | 0.4452  | 0.34108 | 0.50189 | 0.42336 | 0.948 | 0.41548 | 0.54488 | 0.50519 | 0.53778 |
| 0.952 | 0.40584 | 0.50705 | 0.45971 | 0.952 | 0.45009 | 0.34689 | 0.5057  | 0.42813 | 0.952 | 0.42097 | 0.54993 | 0.509   | 0.54124 |
| 0.956 | 0.41065 | 0.51069 | 0.46476 | 0.956 | 0.45475 | 0.3529  | 0.50983 | 0.4329  | 0.956 | 0.42645 | 0.55471 | 0.51281 | 0.54471 |
| 0.96  | 0.41578 | 0.51414 | 0.47008 | 0.96  | 0.45918 | 0.3583  | 0.51396 | 0.43741 | 0.96  | 0.43167 | 0.5592  | 0.51631 | 0.54817 |
| 0.964 | 0.42028 | 0.51701 | 0.47488 | 0.964 | 0.46315 | 0.36307 | 0.51746 | 0.44165 | 0.964 | 0.43661 | 0.56313 | 0.5198  | 0.55077 |
| 0.968 | 0.42509 | 0.51989 | 0.47944 | 0.968 | 0.46711 | 0.36784 | 0.52127 | 0.44589 | 0.968 | 0.44182 | 0.56678 | 0.5233  | 0.55394 |
| 0.972 | 0.42926 | 0.52238 | 0.48348 | 0.972 | 0.4706  | 0.37241 | 0.52508 | 0.45013 | 0.972 | 0.44621 | 0.56987 | 0.52615 | 0.55654 |
| 0.976 | 0.43343 | 0.52468 | 0.48728 | 0.976 | 0.47364 | 0.37656 | 0.52857 | 0.4541  | 0.976 | 0.4506  | 0.57268 | 0.52901 | 0.55884 |
| 0.98  | 0.4376  | 0.52678 | 0.49057 | 0.98  | 0.47643 | 0.38008 | 0.53207 | 0.45781 | 0.98  | 0.45472 | 0.5752  | 0.53187 | 0.56086 |
| 0.984 | 0.44081 | 0.52812 | 0.4936  | 0.984 | 0.47876 | 0.3834  | 0.53525 | 0.46126 | 0.984 | 0.45856 | 0.57689 | 0.53441 | 0.56288 |
| 0.988 | 0.44434 | 0.52966 | 0.49613 | 0.988 | 0.48086 | 0.38651 | 0.53842 | 0.4647  | 0.988 | 0.4624  | 0.57829 | 0.53632 | 0.56462 |
| 0.992 | 0.44722 | 0.531   | 0.49841 | 0.992 | 0.48273 | 0.38942 | 0.5416  | 0.46788 | 0.992 | 0.4657  | 0.5797  | 0.53854 | 0.56577 |
| 0.996 | 0.45011 | 0.53196 | 0.50018 | 0.996 | 0.48413 | 0.3917  | 0.54414 | 0.47106 | 0.996 | 0.46872 | 0.58054 | 0.54013 | 0.56663 |
| 1     | 0.45268 | 0.53291 | 0.50195 | 1     | 0.48529 | 0.39419 | 0.547   | 0.47424 | 1     | 0.47146 | 0.5811  | 0.54172 | 0.56779 |
| 1.004 | 0.45525 | 0.53387 | 0.50321 | 1.004 | 0.48669 | 0.39647 | 0.54986 | 0.47716 | 1.004 | 0.47393 | 0.58166 | 0.5433  | 0.56865 |
| 1.008 | 0.45749 | 0.53464 | 0.50448 | 1.008 | 0.48739 | 0.39876 | 0.5524  | 0.48007 | 1.008 | 0.4764  | 0.58166 | 0.54457 | 0.56923 |
| 1.012 | 0.45974 | 0.53541 | 0.50524 | 1.012 | 0.48832 | 0.40083 | 0.55526 | 0.48272 | 1.012 | 0.47859 | 0.58138 | 0.54584 | 0.56981 |
| 1.016 | 0.46198 | 0.53617 | 0.50574 | 1.016 | 0.48902 | 0.4029  | 0.5578  | 0.48564 | 1.016 | 0.48079 | 0.58138 | 0.54711 | 0.57039 |
| 1.02  | 0.46423 | 0.53713 | 0.50701 | 1.02  | 0.48995 | 0.40539 | 0.56034 | 0.48882 | 1.02  | 0.48271 | 0.58138 | 0.54807 | 0.57096 |
| 1.024 | 0.46647 | 0.53809 | 0.50751 | 1.024 | 0.49065 | 0.40788 | 0.56288 | 0.492   | 1.024 | 0.48491 | 0.58138 | 0.54934 | 0.57154 |
| 1.028 | 0.46808 | 0.53866 | 0.50777 | 1.028 | 0.49135 | 0.40996 | 0.56511 | 0.49518 | 1.028 | 0.48655 | 0.5811  | 0.54997 | 0.57212 |
| 1.032 | 0.47032 | 0.54    | 0.50852 | 1.032 | 0.49182 | 0.41266 | 0.56765 | 0.49889 | 1.032 | 0.48847 | 0.5811  | 0.55124 | 0.57298 |
| 1.036 | 0.47257 | 0.54096 | 0.50928 | 1.036 | 0.49275 | 0.41556 | 0.57051 | 0.50233 | 1.036 | 0.4904  | 0.58138 | 0.55251 | 0.57385 |
| 1.04  | 0.47482 | 0.5423  | 0.51004 | 1.04  | 0.49368 | 0.41846 | 0.57337 | 0.50604 | 1.04  | 0.49232 | 0.58166 | 0.55378 | 0.575   |
| 1.044 | 0.47674 | 0.54364 | 0.51055 | 1.044 | 0.49462 | 0.42116 | 0.57591 | 0.50949 | 1.044 | 0.49424 | 0.58194 | 0.55505 | 0.57616 |
| 1.048 | 0.47899 | 0.54498 | 0.51156 | 1.048 | 0.49578 | 0.42407 | 0.57908 | 0.51346 | 1.048 | 0.49616 | 0.5825  | 0.55632 | 0.57731 |
| 1.052 | 0.48187 | 0.54671 | 0.51257 | 1.052 | 0.49718 | 0.42718 | 0.58194 | 0.51797 | 1.052 | 0.49863 | 0.58335 | 0.55791 | 0.57904 |
| 1.056 | 0.48412 | 0.54843 | 0.51409 | 1.056 | 0.49858 | 0.43029 | 0.58544 | 0.52221 | 1.056 | 0.50082 | 0.58447 | 0.5595  | 0.58077 |
| 1.06  | 0.48701 | 0.54997 | 0.51535 | 1.06  | 0.49998 | 0.4334  | 0.58861 | 0.52671 | 1.06  | 0.50274 | 0.58531 | 0.56109 | 0.58193 |
| 1.064 | 0.48957 | 0.55207 | 0.51662 | 1.064 | 0.50161 | 0.43714 | 0.59211 | 0.53148 | 1.064 | 0.50521 | 0.58643 | 0.56299 | 0.58423 |
| 1.068 | 0.49278 | 0.55437 | 0.51839 | 1.068 | 0.50371 | 0.44066 | 0.5956  | 0.53652 | 1.068 | 0.50768 | 0.58812 | 0.5649  | 0.58625 |
| 1.072 | 0.49567 | 0.55667 | 0.52016 | 1.072 | 0.50604 | 0.44461 | 0.5991  | 0.54129 | 1.072 | 0.51043 | 0.58952 | 0.56712 | 0.58827 |
| 1.076 | 0.49888 | 0.55897 | 0.52193 | 1.076 | 0.50814 | 0.44834 | 0.60291 | 0.54632 | 1.076 | 0.5129  | 0.59121 | 0.56935 | 0.59058 |
| 1.08  | 0.50241 | 0.56146 | 0.52446 | 1.08  | 0.5107  | 0.45207 | 0.60704 | 0.55189 | 1.08  | 0.51564 | 0.59317 | 0.57125 | 0.59289 |
| 1.084 | 0.50626 | 0.56472 | 0.52724 | 1.084 | 0.51373 | 0.45664 | 0.61149 | 0.55745 | 1.084 | 0.51921 | 0.59542 | 0.57411 | 0.59578 |
| 1.088 | 0.50979 | 0.56778 | 0.52977 | 1.088 | 0.51676 | 0.461   | 0.61562 | 0.56302 | 1.088 | 0.5225  | 0.59766 | 0.57697 | 0.59837 |
| 1.092 | 0.51363 | 0.57085 | 0.5323  | 1.092 | 0.52002 | 0.46535 | 0.61975 | 0.56858 | 1.092 | 0.52552 | 0.59963 | 0.57983 | 0.60097 |
| 1.096 | 0.51781 | 0.5743  | 0.53559 | 1.096 | 0.52352 | 0.47012 | 0.62419 | 0.57441 | 1.096 | 0.52881 | 0.60244 | 0.583   | 0.60443 |
| 1.1   | 0.52198 | 0.57794 | 0.53888 | 1.1   | 0.52748 | 0.4749  | 0.62896 | 0.58051 | 1.1   | 0.53238 | 0.60524 | 0.58586 | 0.60761 |
| 1.104 | 0.52647 | 0.58196 | 0.54242 | 1.104 | 0.53145 | 0.48008 | 0.63372 | 0.5866  | 1.104 | 0.53622 | 0.60833 | 0.58935 | 0.61107 |
| 1.108 | 0.53128 | 0.58579 | 0.54621 | 1.108 | 0.53541 | 0.48527 | 0.63849 | 0.5927  | 1.108 | 0.53979 | 0.61114 | 0.59253 | 0.61453 |
| 1.112 | 0.53609 | 0.58962 | 0.55026 | 1.112 | 0.53984 | 0.49087 | 0.64357 | 0.59932 | 1.112 | 0.54391 | 0.61423 | 0.59602 | 0.61799 |
| 1.116 | 0.54219 | 0.59403 | 0.55431 | 1.116 | 0.5445  | 0.49668 | 0.64897 | 0.60595 | 1.116 | 0.54802 | 0.61788 | 0.60015 | 0.62203 |
| 1.12  | 0.547   | 0.59882 | 0.55886 | 1.12  | 0.5494  | 0.5029  | 0.65437 | 0.61284 | 1.12  | 0.55269 | 0.62153 | 0.60396 | 0.62636 |
| 1.124 | 0.55245 | 0.60342 | 0.56316 | 1.124 | 0.55452 | 0.50892 | 0.65977 | 0.61946 | 1.124 | 0.55708 | 0.62546 | 0.60809 | 0.6304  |
| 1.128 | 0.55791 | 0.60878 | 0.56847 | 1.128 | 0.55989 | 0.51556 | 0.66517 | 0.62662 | 1.128 | 0.56229 | 0.62967 | 0.61254 | 0.63473 |
| 1.132 | 0.56465 | 0.61396 | 0.57378 | 1.132 | 0.56548 | 0.5222  | 0.67089 | 0.63351 | 1.132 | 0.56751 | 0.63388 | 0.6173  | 0.63963 |
| 1.136 | 0.57106 | 0.61932 | 0.5791  | 1.136 | 0.57131 | 0.52925 | 0.67693 | 0.64066 | 1.136 | 0.57272 | 0.63837 | 0.62207 | 0.64425 |
| 1.14  | 0.57748 | 0.62488 | 0.58441 | 1.14  | 0.57737 | 0.53631 | 0.68296 | 0.64808 | 1.14  | 0.57821 | 0.64287 | 0.62715 | 0.64915 |
| 1.144 | 0.58422 | 0.63062 | 0.59023 | 1.144 | 0.58366 | 0.54378 | 0.68932 | 0.6555  | 1.144 | 0.58397 | 0.64764 | 0.63223 | 0.65435 |
| 1.148 | 0.59127 | 0.63695 | 0.5968  | 1.148 | 0.59042 | 0.55145 | 0.69567 | 0.66319 | 1.148 | 0.59029 | 0.65326 | 0.63795 | 0.65983 |
| 1.152 | 0.59865 | 0.64288 | 0.60338 | 1.152 | 0.59742 | 0.55934 | 0.70266 | 0.67087 | 1.152 | 0.5966  | 0.65859 | 0.64366 | 0.66531 |
| 1.156 | 0.60603 | 0.64902 | 0.60996 | 1.156 | 0.60441 | 0.56701 | 0.70901 | 0.67829 | 1.156 | 0.60291 | 0.66392 | 0.64938 | 0.67079 |
| 1.16  | 0.61373 | 0.65572 | 0.61704 | 1.16  | 0.61187 | 0.57573 | 0.71632 | 0.68598 | 1.16  | 0.6095  | 0.66982 | 0.65541 | 0.67685 |
| 1.164 | 0.62207 | 0.66243 | 0.62437 | 1.164 | 0.61956 | 0.58444 | 0.72363 | 0.69419 | 1.164 | 0.61636 | 0.676   | 0.66208 | 0.6832  |
| 1.168 | 0.63009 | 0.66932 | 0.63196 | 1.168 | 0.62726 | 0.59315 | 0.73061 | 0.70188 | 1.168 | 0.62377 | 0.68217 | 0.66843 | 0.68984 |
| 1.172 | 0.63843 | 0.67622 | 0.63955 | 1.172 | 0.63495 | 0.60207 | 0.7376  | 0.71009 | 1.172 | 0.6309  | 0.68835 | 0.6751  | 0.69618 |
| 1.176 | 0.64678 | 0.6835  | 0.64714 | 1.176 | 0.64287 | 0.6112  | 0.74491 | 0.71831 | 1.176 | 0.63886 | 0.69481 | 0.68177 | 0.70311 |
| 1.18  | 0.65544 | 0.69097 | 0.65523 | 1.18  | 0.65127 | 0.62075 | 0.75253 | 0.72626 | 1.18  | 0.64682 | 0.70155 | 0.68908 | 0.71003 |
| 1.184 | 0.66506 | 0.6994  | 0.66434 | 1.184 | 0.66036 |         |         |         |       |         |         |         |         |

|                      |          |          |          |                      |          |          |          |                      |       |          |          |          |          |
|----------------------|----------|----------|----------|----------------------|----------|----------|----------|----------------------|-------|----------|----------|----------|----------|
| 1.296                | 0.98556  | 0.98678  | 0.98558  | 1.296                | 0.98531  | 0.98402  | 0.99047  | 0.9894               | 1.296 | 0.98436  | 0.98708  | 0.98666  | 0.98788  |
| 1.3                  | 1        | 1        | 1        | 1.3                  | 1        | 1        | 1        | 1                    | 1.3   | 1        | 1        | 1        | 1        |
| Ethanol-PBS (Spring) |          |          |          | Ethanol-PBS (Summer) |          |          |          | Ethanol-PBS (Autumn) |       |          |          |          |          |
| 0.004                | 0.02023  | 0.02503  | 0.02428  | 0.004                | 0.03607  | 0.03375  | 0.01599  | 0.00375              | 0.004 | 0.04686  | 0.04379  | 0.03547  | 0.05688  |
| 0.008                | 0.01756  | 0.0213   | 0.02083  | 0.008                | 0.03111  | 0.03021  | 0.01292  | 0.00277              | 0.008 | 0.0408   | 0.03601  | 0.03163  | 0.04737  |
| 0.012                | 0.01477  | 0.01783  | 0.01759  | 0.012                | 0.02615  | 0.02707  | 0.0102   | 0.00178              | 0.012 | 0.03555  | 0.03025  | 0.02779  | 0.03971  |
| 0.016                | 0.01226  | 0.01463  | 0.01489  | 0.016                | 0.02209  | 0.02386  | 0.00767  | 9.84E-04             | 0.016 | 0.03054  | 0.02492  | 0.02403  | 0.03302  |
| 0.02                 | 0.01016  | 0.01199  | 0.01252  | 0.02                 | 0.01803  | 0.02137  | 0.00535  | 5.54E-04             | 0.02  | 0.02634  | 0.02024  | 0.02058  | 0.02694  |
| 0.024                | 0.00817  | 0.00954  | 0.01019  | 0.024                | 0.01443  | 0.01856  | 0.0038   | 0                    | 0.024 | 0.02222  | 0.01619  | 0.01743  | 0.02237  |
| 0.028                | 0.00623  | 0.00754  | 0.00818  | 0.028                | 0.01127  | 0.01617  | 0.00221  | 6.15E-05             | 0.028 | 0.01834  | 0.01279  | 0.01489  | 0.01823  |
| 0.032                | 0.00477  | 0.00568  | 0.00643  | 0.032                | 0.00812  | 0.01384  | 0.00101  | 3.08E-04             | 0.032 | 0.01527  | 0.00967  | 0.01198  | 0.01418  |
| 0.036                | 0.0032   | 0.00397  | 0.00492  | 0.036                | 0.00541  | 0.0118   | 2.89E-04 | 8.00E-04             | 0.036 | 0.01212  | 0.00689  | 0.0096   | 0.01101  |
| 0.04                 | 0.0021   | 0.00232  | 0.00337  | 0.04                 | 0.00361  | 0.00982  | 0        | 0.00166              | 0.04  | 0.00953  | 0.00486  | 0.00729  | 0.00801  |
| 0.044                | 0.00125  | 0.00136  | 0.00235  | 0.044                | 0.0018   | 0.00806  | 1.81E-04 | 0.00271              | 0.044 | 0.00719  | 0.00316  | 0.0056   | 0.00537  |
| 0.048                | 6.88E-04 | 4.80E-04 | 0.0014   | 0.048                | 9.02E-04 | 0.00618  | 0.00116  | 0.00437              | 0.048 | 0.00493  | 0.0016   | 0.00407  | 0.00343  |
| 0.052                | 2.02E-04 | 0        | 5.61E-04 | 0.052                | 0        | 0.0046   | 0.0025   | 0.00615              | 0.052 | 0.00331  | 6.61E-04 | 0.00246  | 0.00185  |
| 0.056                | 0        | 0        | 1.30E-04 | 0.056                | 4.51E-04 | 0.00332  | 0.00481  | 0.00818              | 0.056 | 0.00178  | 0        | 0.00115  | 7.92E-04 |
| 0.06                 | 1.62E-04 | 1.60E-04 | 0        | 0.06                 | 0.0018   | 0.00211  | 0.00796  | 0.01132              | 0.06  | 9.70E-04 | 2.36E-04 | 6.91E-04 | 3.52E-04 |
| 0.064                | 6.88E-04 | 6.66E-04 | 1.73E-04 | 0.064                | 0.00316  | 0.00133  | 0.01194  | 0.01452              | 0.064 | 3.23E-04 | 8.49E-04 | 3.07E-04 | 0        |
| 0.068                | 0.00125  | 0.00195  | 8.42E-04 | 0.068                | 0.00541  | 6.03E-04 | 0.01686  | 0.01846              | 0.068 | 0        | 0.00208  | 0        | 4.40E-04 |
| 0.072                | 0.00235  | 0.00336  | 0.0019   | 0.072                | 0.00902  | 1.76E-04 | 0.02287  | 0.02301              | 0.072 | 4.04E-04 | 0.00368  | 5.37E-04 | 0.00167  |
| 0.076                | 0.00401  | 0.00565  | 0.00324  | 0.076                | 0.01353  | 0        | 0.03021  | 0.02812              | 0.076 | 0.00105  | 0.00642  | 0.00161  | 0.00352  |
| 0.08                 | 0.00575  | 0.0081   | 0.00509  | 0.08                 | 0.01894  | 1.51E-04 | 0.03849  | 0.03396              | 0.08  | 0.0025   | 0.00934  | 0.00307  | 0.00581  |
| 0.084                | 0.00785  | 0.0113   | 0.00762  | 0.084                | 0.0257   | 4.77E-04 | 0.04787  | 0.04061              | 0.084 | 0.00436  | 0.01326  | 0.00507  | 0.00863  |
| 0.088                | 0.01056  | 0.01517  | 0.01034  | 0.088                | 0.03336  | 0.00118  | 0.05883  | 0.04793              | 0.088 | 0.00727  | 0.01741  | 0.00714  | 0.01259  |
| 0.092                | 0.01356  | 0.01916  | 0.01362  | 0.092                | 0.04283  | 0.00234  | 0.07091  | 0.05587              | 0.092 | 0.01058  | 0.02256  | 0.00983  | 0.01691  |
| 0.096                | 0.01703  | 0.02423  | 0.01759  | 0.096                | 0.0532   | 0.00359  | 0.08394  | 0.0646               | 0.096 | 0.01511  | 0.0285   | 0.01351  | 0.02263  |
| 0.1                  | 0.02092  | 0.02956  | 0.02191  | 0.1                  | 0.06447  | 0.00517  | 0.09805  | 0.07402              | 0.1   | 0.01996  | 0.03464  | 0.01781  | 0.02835  |
| 0.104                | 0.02525  | 0.03542  | 0.02666  | 0.104                | 0.07665  | 0.00716  | 0.11324  | 0.0838               | 0.104 | 0.02594  | 0.04124  | 0.0228   | 0.0354   |
| 0.108                | 0.03002  | 0.04155  | 0.03184  | 0.108                | 0.09017  | 0.00932  | 0.12952  | 0.09432              | 0.108 | 0.03256  | 0.04842  | 0.02787  | 0.04332  |
| 0.112                | 0.035    | 0.04822  | 0.03724  | 0.112                | 0.10415  | 0.01175  | 0.1458   | 0.10515              | 0.112 | 0.04007  | 0.05616  | 0.03424  | 0.05195  |
| 0.116                | 0.0403   | 0.05515  | 0.04307  | 0.116                | 0.11858  | 0.01442  | 0.16281  | 0.11641              | 0.116 | 0.04896  | 0.06375  | 0.04138  | 0.06164  |
| 0.12                 | 0.04584  | 0.06208  | 0.04868  | 0.12                 | 0.13345  | 0.01713  | 0.17945  | 0.12798              | 0.12  | 0.05841  | 0.07168  | 0.0486   | 0.0722   |
| 0.124                | 0.05179  | 0.06927  | 0.05472  | 0.124                | 0.14833  | 0.02004  | 0.19609  | 0.13936              | 0.124 | 0.06908  | 0.07985  | 0.05735  | 0.08409  |
| 0.128                | 0.0579   | 0.07647  | 0.06077  | 0.128                | 0.16276  | 0.02306  | 0.21274  | 0.15148              | 0.128 | 0.08031  | 0.08744  | 0.06664  | 0.09703  |
| 0.132                | 0.06381  | 0.0834   | 0.06659  | 0.132                | 0.17628  | 0.02612  | 0.22829  | 0.16305              | 0.132 | 0.09283  | 0.0949   | 0.07708  | 0.11059  |
| 0.136                | 0.07061  | 0.09086  | 0.07242  | 0.136                | 0.18981  | 0.02873  | 0.24313  | 0.17517              | 0.136 | 0.10616  | 0.10292  | 0.08845  | 0.12574  |
| 0.14                 | 0.07789  | 0.09806  | 0.07825  | 0.14                 | 0.20243  | 0.0321   | 0.25687  | 0.18723              | 0.14  | 0.12063  | 0.11     | 0.10073  | 0.14211  |
| 0.144                | 0.08521  | 0.10579  | 0.08386  | 0.144                | 0.21326  | 0.03541  | 0.2699   | 0.19953              | 0.144 | 0.13606  | 0.11755  | 0.11417  | 0.15964  |
| 0.148                | 0.09319  | 0.11352  | 0.08948  | 0.148                | 0.22453  | 0.03868  | 0.2822   | 0.21227              | 0.148 | 0.15246  | 0.12557  | 0.12829  | 0.17839  |
| 0.152                | 0.10176  | 0.12204  | 0.0953   | 0.152                | 0.2349   | 0.04212  | 0.29378  | 0.22574              | 0.152 | 0.16951  | 0.13359  | 0.14357  | 0.19838  |
| 0.156                | 0.11107  | 0.13111  | 0.10178  | 0.156                | 0.24482  | 0.04563  | 0.30499  | 0.23996              | 0.156 | 0.18712  | 0.14209  | 0.16038  | 0.21942  |
| 0.16                 | 0.12151  | 0.14097  | 0.10869  | 0.16                 | 0.25518  | 0.0499   | 0.31621  | 0.25497              | 0.16  | 0.20587  | 0.15105  | 0.1772   | 0.24126  |
| 0.164                | 0.13248  | 0.15216  | 0.11603  | 0.164                | 0.26555  | 0.05417  | 0.32706  | 0.27078              | 0.164 | 0.2238   | 0.16049  | 0.19417  | 0.26345  |
| 0.168                | 0.14461  | 0.16442  | 0.12445  | 0.168                | 0.27728  | 0.05894  | 0.33828  | 0.28782              | 0.168 | 0.24222  | 0.1704   | 0.21175  | 0.28537  |
| 0.172                | 0.15797  | 0.17775  | 0.13416  | 0.172                | 0.2899   | 0.06422  | 0.34949  | 0.30499              | 0.172 | 0.26024  | 0.18126  | 0.22864  | 0.3066   |
| 0.176                | 0.17213  | 0.19268  | 0.14495  | 0.176                | 0.30343  | 0.07     | 0.36071  | 0.32314              | 0.176 | 0.27729  | 0.19211  | 0.24453  | 0.32649  |
| 0.18                 | 0.1871   | 0.20813  | 0.15661  | 0.18                 | 0.3183   | 0.07627  | 0.37192  | 0.34148              | 0.18  | 0.2928   | 0.20296  | 0.2585   | 0.34481  |
| 0.184                | 0.20288  | 0.22493  | 0.16956  | 0.184                | 0.33454  | 0.08305  | 0.38314  | 0.35981              | 0.184 | 0.30734  | 0.21382  | 0.27086  | 0.36101  |
| 0.188                | 0.21947  | 0.24172  | 0.18359  | 0.188                | 0.35167  | 0.09034  | 0.39436  | 0.37735              | 0.188 | 0.32003  | 0.22467  | 0.28084  | 0.37422  |
| 0.192                | 0.23606  | 0.25931  | 0.19827  | 0.192                | 0.3697   | 0.09737  | 0.40485  | 0.39519              | 0.192 | 0.33045  | 0.23458  | 0.28814  | 0.38461  |
| 0.196                | 0.25265  | 0.2761   | 0.2136   | 0.196                | 0.38729  | 0.10465  | 0.41462  | 0.41057              | 0.196 | 0.33853  | 0.2426   | 0.29251  | 0.3906   |
| 0.2                  | 0.26884  | 0.29236  | 0.22893  | 0.2                  | 0.40532  | 0.11169  | 0.42366  | 0.42472              | 0.2   | 0.34483  | 0.24968  | 0.29459  | 0.39403  |
| 0.204                | 0.28421  | 0.30755  | 0.24404  | 0.204                | 0.42245  | 0.11872  | 0.43126  | 0.43703              | 0.204 | 0.34887  | 0.25534  | 0.29382  | 0.39368  |
| 0.208                | 0.29797  | 0.32088  | 0.25828  | 0.208                | 0.43868  | 0.125    | 0.43669  | 0.44749              | 0.208 | 0.35041  | 0.25865  | 0.29083  | 0.38954  |
| 0.212                | 0.31051  | 0.3326   | 0.27145  | 0.212                | 0.45311  | 0.13077  | 0.44139  | 0.45549              | 0.212 | 0.34984  | 0.26006  | 0.28568  | 0.38241  |
| 0.216                | 0.32103  | 0.3422   | 0.28289  | 0.216                | 0.46573  | 0.1358   | 0.44428  | 0.46164              | 0.216 | 0.34782  | 0.25959  | 0.27893  | 0.37299  |
| 0.22                 | 0.32993  | 0.3494   | 0.29261  | 0.22                 | 0.47701  | 0.13981  | 0.44609  | 0.46533              | 0.22  | 0.34378  | 0.25723  | 0.27125  | 0.3611   |
| 0.224                | 0.33681  | 0.35366  | 0.29995  | 0.224                | 0.48512  | 0.14283  | 0.44682  | 0.46779              | 0.224 | 0.33845  | 0.25204  | 0.26273  | 0.34736  |
| 0.228                | 0.34045  | 0.35553  | 0.30448  | 0.228                | 0.49008  | 0.14459  | 0.44573  | 0.46779              | 0.228 | 0.33094  | 0.24543  | 0.25305  | 0.33187  |
| 0.232                | 0.34248  | 0.35499  | 0.30642  | 0.232                | 0.49279  | 0.14534  | 0.44392  | 0.46656              | 0.232 | 0.32294  | 0.23788  | 0.24353  | 0.31593  |
| 0.236                | 0.34207  | 0.3518   | 0.30577  | 0.236                | 0.49234  | 0.14509  | 0.44139  | 0.4641               | 0.236 | 0.31381  | 0.22892  | 0.23386  | 0.29929  |
| 0.24                 | 0.34005  | 0.34646  | 0.30254  | 0.24                 | 0.49008  | 0.14308  | 0.43813  | 0.46041              | 0.24  | 0.30379  | 0.21854  | 0.22418  | 0.28238  |
| 0.244                | 0.33641  | 0.33927  | 0.29692  | 0.244                | 0.48467  | 0.14032  | 0.43379  | 0.45672              | 0.244 | 0.29296  | 0.20768  | 0.21443  | 0.26521  |
| 0.248                | 0.33155  | 0.33047  | 0.28915  | 0.248                | 0.47656  | 0.1363   | 0.42909  | 0.45118              | 0.248 | 0.28222  | 0.19636  | 0.20507  | 0.24875  |
| 0.252                | 0.32589  | 0.32088  | 0.28009  | 0.252                | 0.46754  | 0.13153  | 0.42475  | 0.44503              | 0.252 | 0.27139  | 0.18598  | 0.19601  | 0.23298  |
| 0.256                | 0.31982  | 0.31048  | 0.26951  | 0.256                | 0.45672  | 0.126    | 0.41968  | 0.43887              | 0.256 | 0.26008  | 0.17465  | 0.18695  | 0.21819  |
| 0.26                 | 0.31254  | 0.29902  | 0.25785  | 0.26                 | 0.44409  | 0.11997  | 0.41462  | 0.4321               | 0.26  | 0.24885  | 0.16332  | 0.17843  | 0.2034   |
| 0.264                | 0.30606  | 0.28809  | 0.2462   | 0.264                | 0.43192  | 0.1137   | 0.41027  | 0.42595              | 0.264 | 0.23851  | 0.15294  | 0.17021  | 0.19037  |
| 0.268                | 0.29918  | 0.27637  | 0.23411  | 0.268                | 0.41885  | 0.10742  | 0.40557  | 0.41918              | 0.268 | 0.22808  | 0.14303  | 0.16207  | 0.17778  |
| 0.272                | 0.29271  | 0.26517  | 0.22223  | 0.272                | 0.40532  | 0.10114  | 0.40123  | 0.41303              | 0.272 | 0.21855  | 0.13312  | 0.15432  | 0.16633  |
| 0.276                | 0.28583  | 0.25424  | 0.21036  | 0.276                | 0.39179  | 0.09461  | 0.39689  | 0.40811              | 0.276 | 0.20966  | 0.12463  | 0.14672  | 0.15488  |
| 0.28                 | 0.27976  | 0.24332  | 0.19914  | 0.28                 | 0.37917  | 0.08858  | 0.39327  | 0.40196              | 0.28  | 0.20134  | 0.11566  | 0.13958  | 0.14502  |
| 0.284                | 0.2741   | 0.23346  | 0.18856  | 0.284                | 0.36655  | 0.0823   | 0.39038  | 0.39765              | 0.284 | 0.19367  | 0.10811  | 0.13305  | 0.13586  |
| 0.288                | 0.26884  | 0.22359  | 0.17863  | 0.288                | 0.35437  | 0.07678  | 0.38784  | 0.39334              | 0.288 | 0.18696  | 0.10103  | 0.1266   | 0.12759  |
| 0.292                | 0.26358  | 0.21453  | 0.16935  | 0.292                | 0.34265  | 0.07125  | 0.38567  | 0.38965              | 0.292 | 0.18058  | 0.0949   | 0.12046  | 0.       |

|       |         |         |         |       |         |         |         |         |       |         |         |         |         |
|-------|---------|---------|---------|-------|---------|---------|---------|---------|-------|---------|---------|---------|---------|
| 0.4   | 0.20895 | 0.11245 | 0.08667 | 0.4   | 0.20875 | 0.04086 | 0.48191 | 0.45795 | 0.4   | 0.16515 | 0.08131 | 0.11409 | 0.09941 |
| 0.404 | 0.20895 | 0.11165 | 0.08645 | 0.404 | 0.2083  | 0.04162 | 0.48661 | 0.46348 | 0.404 | 0.16838 | 0.08518 | 0.11793 | 0.10408 |
| 0.408 | 0.20976 | 0.11085 | 0.08624 | 0.408 | 0.20784 | 0.04237 | 0.49132 | 0.46841 | 0.408 | 0.1725  | 0.08971 | 0.12177 | 0.10918 |
| 0.412 | 0.21057 | 0.11058 | 0.08602 | 0.412 | 0.20784 | 0.04312 | 0.49566 | 0.47333 | 0.412 | 0.17694 | 0.09443 | 0.12583 | 0.11411 |
| 0.416 | 0.21097 | 0.10952 | 0.08559 | 0.416 | 0.20739 | 0.04337 | 0.49891 | 0.47702 | 0.416 | 0.18155 | 0.09867 | 0.12983 | 0.11922 |
| 0.42  | 0.21138 | 0.10898 | 0.08559 | 0.42  | 0.20694 | 0.04388 | 0.50181 | 0.48133 | 0.42  | 0.18615 | 0.10339 | 0.13382 | 0.12389 |
| 0.424 | 0.21219 | 0.10819 | 0.08516 | 0.424 | 0.20694 | 0.04438 | 0.5047  | 0.4844  | 0.424 | 0.19124 | 0.10764 | 0.13797 | 0.129   |
| 0.428 | 0.213   | 0.10792 | 0.08494 | 0.428 | 0.20694 | 0.04488 | 0.50687 | 0.48686 | 0.428 | 0.19633 | 0.11189 | 0.14226 | 0.13384 |
| 0.432 | 0.2134  | 0.10739 | 0.08473 | 0.432 | 0.20694 | 0.04513 | 0.50796 | 0.48809 | 0.432 | 0.20183 | 0.11613 | 0.1461  | 0.1385  |
| 0.436 | 0.21381 | 0.10685 | 0.08451 | 0.436 | 0.20694 | 0.04563 | 0.50904 | 0.48809 | 0.436 | 0.20684 | 0.11991 | 0.15017 | 0.14308 |
| 0.44  | 0.21421 | 0.10632 | 0.08408 | 0.44  | 0.20649 | 0.04588 | 0.50977 | 0.48809 | 0.44  | 0.21184 | 0.12321 | 0.15386 | 0.14705 |
| 0.444 | 0.21462 | 0.10605 | 0.08408 | 0.444 | 0.20649 | 0.04614 | 0.51085 | 0.48686 | 0.444 | 0.21685 | 0.12652 | 0.1577  | 0.15074 |
| 0.448 | 0.21502 | 0.10605 | 0.08408 | 0.448 | 0.20649 | 0.04639 | 0.51158 | 0.48563 | 0.448 | 0.2213  | 0.12935 | 0.16123 | 0.15453 |
| 0.452 | 0.21502 | 0.10552 | 0.08365 | 0.452 | 0.20649 | 0.04639 | 0.51194 | 0.48317 | 0.452 | 0.22509 | 0.13171 | 0.16438 | 0.15708 |
| 0.456 | 0.21542 | 0.10552 | 0.08365 | 0.456 | 0.20649 | 0.04639 | 0.5123  | 0.48133 | 0.456 | 0.22881 | 0.13359 | 0.16722 | 0.16017 |
| 0.46  | 0.21542 | 0.10579 | 0.08386 | 0.46  | 0.20649 | 0.04664 | 0.51302 | 0.47948 | 0.46  | 0.23172 | 0.13501 | 0.17006 | 0.16281 |
| 0.464 | 0.21542 | 0.10552 | 0.08386 | 0.464 | 0.20649 | 0.04664 | 0.51339 | 0.47702 | 0.464 | 0.23382 | 0.13643 | 0.1719  | 0.1651  |
| 0.468 | 0.21542 | 0.10579 | 0.08408 | 0.468 | 0.20649 | 0.04664 | 0.51411 | 0.47517 | 0.468 | 0.23503 | 0.13737 | 0.17367 | 0.1673  |
| 0.472 | 0.21502 | 0.10605 | 0.0843  | 0.472 | 0.20649 | 0.04714 | 0.51447 | 0.47333 | 0.472 | 0.23544 | 0.13784 | 0.17489 | 0.16923 |
| 0.476 | 0.21502 | 0.10632 | 0.08451 | 0.476 | 0.20649 | 0.04714 | 0.5152  | 0.4721  | 0.476 | 0.23536 | 0.13879 | 0.17582 | 0.17091 |
| 0.48  | 0.21462 | 0.10659 | 0.08494 | 0.48  | 0.20649 | 0.04739 | 0.51556 | 0.47025 | 0.48  | 0.23447 | 0.13926 | 0.17681 | 0.17276 |
| 0.484 | 0.21462 | 0.10712 | 0.08516 | 0.484 | 0.20649 | 0.04764 | 0.51556 | 0.46902 | 0.484 | 0.23326 | 0.13926 | 0.17704 | 0.17381 |
| 0.488 | 0.21381 | 0.10739 | 0.08559 | 0.488 | 0.20694 | 0.04815 | 0.51628 | 0.46841 | 0.488 | 0.2318  | 0.13973 | 0.17781 | 0.17557 |
| 0.492 | 0.2134  | 0.10819 | 0.08624 | 0.492 | 0.20739 | 0.04815 | 0.51664 | 0.46718 | 0.492 | 0.23051 | 0.14067 | 0.17827 | 0.17698 |
| 0.496 | 0.213   | 0.10872 | 0.08689 | 0.496 | 0.20784 | 0.0489  | 0.51664 | 0.46656 | 0.496 | 0.22905 | 0.14114 | 0.17858 | 0.17866 |
| 0.5   | 0.21259 | 0.10925 | 0.08732 | 0.5   | 0.2083  | 0.04915 | 0.51664 | 0.46533 | 0.5   | 0.22744 | 0.14114 | 0.17935 | 0.18015 |
| 0.504 | 0.21178 | 0.11005 | 0.08818 | 0.504 | 0.20875 | 0.0499  | 0.51737 | 0.46471 | 0.504 | 0.22615 | 0.14209 | 0.17996 | 0.18156 |
| 0.508 | 0.21138 | 0.11085 | 0.08883 | 0.508 | 0.2101  | 0.05041 | 0.51773 | 0.46471 | 0.508 | 0.22526 | 0.14303 | 0.18096 | 0.18297 |
| 0.512 | 0.21138 | 0.11138 | 0.08969 | 0.512 | 0.21145 | 0.05091 | 0.51809 | 0.4641  | 0.512 | 0.22469 | 0.1435  | 0.18188 | 0.18464 |
| 0.516 | 0.21097 | 0.11218 | 0.09034 | 0.516 | 0.21235 | 0.05166 | 0.51845 | 0.46348 | 0.516 | 0.22308 | 0.14445 | 0.1825  | 0.18588 |
| 0.52  | 0.21057 | 0.11298 | 0.09142 | 0.52  | 0.21371 | 0.05267 | 0.51918 | 0.46348 | 0.52  | 0.22251 | 0.14539 | 0.1838  | 0.18737 |
| 0.524 | 0.21057 | 0.11378 | 0.09228 | 0.524 | 0.21506 | 0.05317 | 0.52026 | 0.4641  | 0.524 | 0.2217  | 0.14634 | 0.18495 | 0.1894  |
| 0.528 | 0.21057 | 0.11485 | 0.09336 | 0.528 | 0.21686 | 0.05417 | 0.52098 | 0.4641  | 0.528 | 0.22106 | 0.14728 | 0.18649 | 0.19046 |
| 0.532 | 0.21097 | 0.11565 | 0.09444 | 0.532 | 0.21867 | 0.05518 | 0.52243 | 0.4641  | 0.532 | 0.22025 | 0.1487  | 0.18787 | 0.19204 |
| 0.536 | 0.21097 | 0.11645 | 0.09552 | 0.536 | 0.22047 | 0.05593 | 0.52352 | 0.46471 | 0.536 | 0.21968 | 0.14964 | 0.18964 | 0.19345 |
| 0.54  | 0.21178 | 0.11778 | 0.09682 | 0.54  | 0.22272 | 0.05719 | 0.52533 | 0.46594 | 0.54  | 0.21952 | 0.15105 | 0.19117 | 0.19539 |
| 0.544 | 0.21219 | 0.11885 | 0.09811 | 0.544 | 0.22498 | 0.05819 | 0.52677 | 0.46656 | 0.544 | 0.21936 | 0.15247 | 0.19294 | 0.19697 |
| 0.548 | 0.213   | 0.11991 | 0.09941 | 0.548 | 0.22723 | 0.0592  | 0.52786 | 0.46779 | 0.548 | 0.21871 | 0.15389 | 0.19463 | 0.19856 |
| 0.552 | 0.21381 | 0.12098 | 0.10092 | 0.552 | 0.22904 | 0.06045 | 0.52931 | 0.46841 | 0.552 | 0.21895 | 0.15577 | 0.19647 | 0.20067 |
| 0.556 | 0.21462 | 0.12204 | 0.10221 | 0.556 | 0.23129 | 0.06171 | 0.53111 | 0.47025 | 0.556 | 0.21904 | 0.15766 | 0.19893 | 0.20234 |
| 0.56  | 0.21583 | 0.12311 | 0.10372 | 0.56  | 0.23399 | 0.06271 | 0.53256 | 0.47148 | 0.56  | 0.21952 | 0.15955 | 0.20092 | 0.20419 |
| 0.564 | 0.21664 | 0.12471 | 0.10523 | 0.564 | 0.2358  | 0.06422 | 0.53365 | 0.47333 | 0.564 | 0.21976 | 0.16144 | 0.20299 | 0.20604 |
| 0.568 | 0.21745 | 0.12578 | 0.10675 | 0.568 | 0.2385  | 0.06573 | 0.53473 | 0.47456 | 0.568 | 0.22041 | 0.16332 | 0.20522 | 0.20833 |
| 0.572 | 0.21907 | 0.12738 | 0.10847 | 0.572 | 0.24121 | 0.06698 | 0.53582 | 0.4764  | 0.572 | 0.22138 | 0.16568 | 0.20783 | 0.2108  |
| 0.576 | 0.22028 | 0.12871 | 0.1102  | 0.576 | 0.24301 | 0.06824 | 0.53654 | 0.47763 | 0.576 | 0.22243 | 0.16757 | 0.21036 | 0.21335 |
| 0.58  | 0.22109 | 0.13004 | 0.11149 | 0.58  | 0.24527 | 0.06974 | 0.5369  | 0.47887 | 0.58  | 0.2234  | 0.16946 | 0.21259 | 0.21537 |
| 0.584 | 0.2223  | 0.13164 | 0.11322 | 0.584 | 0.24797 | 0.0715  | 0.53726 | 0.48071 | 0.584 | 0.22477 | 0.17229 | 0.2152  | 0.21819 |
| 0.588 | 0.22352 | 0.13324 | 0.11495 | 0.588 | 0.25023 | 0.07276 | 0.53726 | 0.48194 | 0.588 | 0.22606 | 0.17465 | 0.21781 | 0.22039 |
| 0.592 | 0.22433 | 0.13484 | 0.11668 | 0.592 | 0.25203 | 0.07452 | 0.53654 | 0.48317 | 0.592 | 0.2272  | 0.17701 | 0.22019 | 0.22303 |
| 0.596 | 0.22514 | 0.1367  | 0.1184  | 0.596 | 0.25428 | 0.07627 | 0.53582 | 0.4844  | 0.596 | 0.22873 | 0.1789  | 0.22273 | 0.22559 |
| 0.6   | 0.22594 | 0.13857 | 0.12035 | 0.6   | 0.25699 | 0.07778 | 0.53509 | 0.48563 | 0.6   | 0.23002 | 0.18126 | 0.22541 | 0.22779 |
| 0.604 | 0.22675 | 0.1407  | 0.12229 | 0.604 | 0.25924 | 0.07954 | 0.53365 | 0.48686 | 0.604 | 0.2318  | 0.18362 | 0.22802 | 0.23017 |
| 0.608 | 0.22756 | 0.14283 | 0.12423 | 0.608 | 0.2615  | 0.08155 | 0.53256 | 0.48748 | 0.608 | 0.23301 | 0.18598 | 0.23056 | 0.23272 |
| 0.612 | 0.22797 | 0.1447  | 0.12596 | 0.612 | 0.26375 | 0.08331 | 0.53039 | 0.48809 | 0.612 | 0.23455 | 0.18739 | 0.23263 | 0.23466 |
| 0.616 | 0.22918 | 0.14737 | 0.12812 | 0.616 | 0.26601 | 0.08557 | 0.52858 | 0.48933 | 0.616 | 0.23576 | 0.18975 | 0.23524 | 0.23668 |
| 0.62  | 0.22999 | 0.15003 | 0.13028 | 0.62  | 0.26871 | 0.08758 | 0.52677 | 0.48994 | 0.62  | 0.23729 | 0.19211 | 0.2377  | 0.23906 |
| 0.624 | 0.2308  | 0.15243 | 0.13243 | 0.624 | 0.27096 | 0.08984 | 0.52424 | 0.49056 | 0.624 | 0.23859 | 0.194   | 0.23992 | 0.24153 |
| 0.628 | 0.2312  | 0.15563 | 0.13438 | 0.628 | 0.27322 | 0.09235 | 0.52207 | 0.49117 | 0.628 | 0.24004 | 0.19589 | 0.2423  | 0.24329 |
| 0.632 | 0.23201 | 0.15829 | 0.13675 | 0.632 | 0.27547 | 0.09461 | 0.51918 | 0.49117 | 0.632 | 0.24117 | 0.19777 | 0.24422 | 0.24487 |
| 0.636 | 0.23323 | 0.16176 | 0.13891 | 0.636 | 0.27818 | 0.09737 | 0.517   | 0.49179 | 0.636 | 0.24263 | 0.20013 | 0.24653 | 0.2469  |
| 0.64  | 0.23404 | 0.16549 | 0.1415  | 0.64  | 0.28088 | 0.09988 | 0.51447 | 0.4924  | 0.64  | 0.24384 | 0.20202 | 0.24883 | 0.24883 |
| 0.644 | 0.23525 | 0.16895 | 0.14387 | 0.644 | 0.28314 | 0.10264 | 0.51158 | 0.4924  | 0.644 | 0.24481 | 0.20344 | 0.2506  | 0.24998 |
| 0.648 | 0.23606 | 0.17269 | 0.14668 | 0.648 | 0.28584 | 0.10566 | 0.50941 | 0.49363 | 0.648 | 0.24594 | 0.20532 | 0.2529  | 0.25165 |
| 0.652 | 0.23768 | 0.17642 | 0.14927 | 0.652 | 0.28855 | 0.10867 | 0.50687 | 0.49425 | 0.652 | 0.24723 | 0.20721 | 0.25482 | 0.25324 |
| 0.656 | 0.23849 | 0.18068 | 0.15229 | 0.656 | 0.29125 | 0.11194 | 0.5047  | 0.49486 | 0.656 | 0.24844 | 0.2091  | 0.25674 | 0.25456 |
| 0.66  | 0.24011 | 0.18495 | 0.1551  | 0.66  | 0.29441 | 0.1152  | 0.50217 | 0.49548 | 0.66  | 0.2495  | 0.21051 | 0.2585  | 0.25605 |
| 0.664 | 0.24132 | 0.18921 | 0.15791 | 0.664 | 0.29757 | 0.11847 | 0.5     | 0.49609 | 0.664 | 0.25063 | 0.2124  | 0.26027 | 0.25702 |
| 0.668 | 0.24334 | 0.19374 | 0.16114 | 0.668 | 0.30072 | 0.12223 | 0.49819 | 0.49732 | 0.668 | 0.25224 | 0.21429 | 0.26234 | 0.25825 |
| 0.672 | 0.24537 | 0.19854 | 0.1646  | 0.672 | 0.30433 | 0.12575 | 0.49674 | 0.49855 | 0.672 | 0.25345 | 0.21618 | 0.26441 | 0.25984 |
| 0.676 | 0.24699 | 0.20307 | 0.16784 | 0.676 | 0.30748 | 0.12952 | 0.49493 | 0.49978 | 0.676 | 0.25459 | 0.21759 | 0.26603 | 0.26081 |
| 0.68  | 0.24941 | 0.20813 | 0.17107 | 0.68  | 0.31109 | 0.13328 | 0.49349 | 0.50163 | 0.68  | 0.2562  | 0.21901 | 0.2681  | 0.26195 |
| 0.684 | 0.25184 | 0.21293 | 0.17474 | 0.684 | 0.3147  | 0.1373  | 0.4924  | 0.50348 | 0.684 | 0.25782 | 0.22137 | 0.27002 | 0.26345 |
| 0.688 | 0.25467 | 0.21826 | 0.1782  | 0.688 | 0.3183  | 0.14107 | 0.49132 | 0.50532 | 0.688 | 0.25984 | 0.22278 | 0.27225 | 0.26459 |
| 0.692 | 0.2571  | 0.22333 | 0.18187 | 0.692 | 0.32236 | 0.14534 | 0.49023 | 0.50717 | 0.692 | 0.2621  | 0.22514 | 0.27424 | 0.26592 |
| 0.696 | 0.26034 | 0.22812 | 0.18554 | 0.696 | 0.32597 | 0.14936 | 0.48951 | 0.50963 | 0.696 | 0.26428 | 0.22656 | 0.27639 | 0.26715 |
| 0.7   | 0.26358 | 0.23346 | 0.18964 | 0.7   |         |         |         |         |       |         |         |         |         |

|       |         |         |         |       |         |         |         |         |       |         |         |         |         |
|-------|---------|---------|---------|-------|---------|---------|---------|---------|-------|---------|---------|---------|---------|
| 0.812 | 0.36999 | 0.3462  | 0.28807 | 0.812 | 0.41885 | 0.24103 | 0.49964 | 0.57977 | 0.812 | 0.33845 | 0.25582 | 0.31747 | 0.29189 |
| 0.816 | 0.37202 | 0.34886 | 0.28915 | 0.816 | 0.4202  | 0.24279 | 0.49964 | 0.581   | 0.816 | 0.34063 | 0.25676 | 0.31908 | 0.29321 |
| 0.82  | 0.37444 | 0.35073 | 0.29002 | 0.82  | 0.42065 | 0.24454 | 0.49928 | 0.58223 | 0.82  | 0.34233 | 0.25723 | 0.32077 | 0.29436 |
| 0.824 | 0.37606 | 0.35259 | 0.29045 | 0.824 | 0.4211  | 0.2458  | 0.49819 | 0.58346 | 0.824 | 0.34411 | 0.2577  | 0.32184 | 0.29559 |
| 0.828 | 0.37849 | 0.35526 | 0.29131 | 0.828 | 0.422   | 0.24756 | 0.49819 | 0.58469 | 0.828 | 0.34645 | 0.25912 | 0.32384 | 0.29717 |
| 0.832 | 0.38011 | 0.35739 | 0.29217 | 0.832 | 0.4229  | 0.24906 | 0.49819 | 0.58654 | 0.832 | 0.34831 | 0.26006 | 0.32599 | 0.29893 |
| 0.836 | 0.38213 | 0.35926 | 0.29261 | 0.836 | 0.42335 | 0.25057 | 0.49747 | 0.58777 | 0.836 | 0.35081 | 0.26054 | 0.32791 | 0.3007  |
| 0.84  | 0.38415 | 0.36139 | 0.29347 | 0.84  | 0.42426 | 0.25258 | 0.49783 | 0.58961 | 0.84  | 0.35291 | 0.26242 | 0.32998 | 0.3029  |
| 0.844 | 0.38618 | 0.36379 | 0.29433 | 0.844 | 0.42516 | 0.25409 | 0.49747 | 0.59146 | 0.844 | 0.35566 | 0.26337 | 0.33259 | 0.30519 |
| 0.848 | 0.3882  | 0.36592 | 0.29477 | 0.848 | 0.42651 | 0.25585 | 0.49711 | 0.59331 | 0.848 | 0.35833 | 0.26525 | 0.33505 | 0.30748 |
| 0.852 | 0.39022 | 0.36805 | 0.29563 | 0.852 | 0.42741 | 0.25735 | 0.49711 | 0.59454 | 0.852 | 0.36083 | 0.26667 | 0.33774 | 0.30985 |
| 0.856 | 0.39184 | 0.36992 | 0.29628 | 0.856 | 0.42831 | 0.25886 | 0.49674 | 0.59638 | 0.856 | 0.36334 | 0.26856 | 0.34019 | 0.31241 |
| 0.86  | 0.39387 | 0.37232 | 0.29714 | 0.86  | 0.42967 | 0.26037 | 0.49674 | 0.59823 | 0.86  | 0.3656  | 0.26997 | 0.3428  | 0.31478 |
| 0.864 | 0.39548 | 0.37418 | 0.29779 | 0.864 | 0.43057 | 0.26212 | 0.49674 | 0.60007 | 0.864 | 0.36843 | 0.27233 | 0.34557 | 0.31743 |
| 0.868 | 0.3971  | 0.37578 | 0.29843 | 0.868 | 0.43147 | 0.26363 | 0.49638 | 0.6013  | 0.868 | 0.37085 | 0.27375 | 0.34779 | 0.31927 |
| 0.872 | 0.39872 | 0.37792 | 0.2993  | 0.872 | 0.43282 | 0.26489 | 0.49638 | 0.60315 | 0.872 | 0.37352 | 0.27611 | 0.35086 | 0.322   |
| 0.876 | 0.40034 | 0.37978 | 0.30016 | 0.876 | 0.43417 | 0.26664 | 0.49638 | 0.605   | 0.876 | 0.3765  | 0.27847 | 0.35409 | 0.325   |
| 0.88  | 0.40196 | 0.38165 | 0.30103 | 0.88  | 0.43553 | 0.26815 | 0.49602 | 0.60623 | 0.88  | 0.37885 | 0.28035 | 0.3567  | 0.32782 |
| 0.884 | 0.40317 | 0.38298 | 0.30146 | 0.884 | 0.43643 | 0.26941 | 0.49566 | 0.60746 | 0.884 | 0.38119 | 0.28224 | 0.35939 | 0.33046 |
| 0.888 | 0.40439 | 0.38458 | 0.3021  | 0.888 | 0.43688 | 0.27091 | 0.4953  | 0.60869 | 0.888 | 0.38337 | 0.28366 | 0.36184 | 0.33283 |
| 0.892 | 0.406   | 0.38618 | 0.30297 | 0.892 | 0.43823 | 0.27217 | 0.49457 | 0.60992 | 0.892 | 0.3858  | 0.28602 | 0.3643  | 0.3353  |
| 0.896 | 0.40681 | 0.38778 | 0.30362 | 0.896 | 0.43913 | 0.27368 | 0.49421 | 0.61053 | 0.896 | 0.38782 | 0.28791 | 0.36737 | 0.33785 |
| 0.9   | 0.40762 | 0.38858 | 0.30405 | 0.9   | 0.43959 | 0.27468 | 0.49349 | 0.61115 | 0.9   | 0.38943 | 0.28979 | 0.36967 | 0.33997 |
| 0.904 | 0.40843 | 0.39018 | 0.30491 | 0.904 | 0.44049 | 0.27619 | 0.49276 | 0.61176 | 0.904 | 0.39129 | 0.29168 | 0.37198 | 0.34217 |
| 0.908 | 0.40965 | 0.39098 | 0.30577 | 0.908 | 0.44094 | 0.27744 | 0.49168 | 0.61238 | 0.908 | 0.39315 | 0.29357 | 0.37428 | 0.34472 |
| 0.912 | 0.41046 | 0.39204 | 0.30642 | 0.912 | 0.44139 | 0.27845 | 0.49096 | 0.61238 | 0.912 | 0.39452 | 0.29498 | 0.37658 | 0.34683 |
| 0.916 | 0.41086 | 0.39311 | 0.30685 | 0.916 | 0.44184 | 0.2797  | 0.48987 | 0.61238 | 0.916 | 0.39565 | 0.2964  | 0.37889 | 0.34868 |
| 0.92  | 0.41167 | 0.39391 | 0.30772 | 0.92  | 0.44184 | 0.28096 | 0.48878 | 0.61176 | 0.92  | 0.39662 | 0.29782 | 0.38042 | 0.35053 |
| 0.924 | 0.41288 | 0.39471 | 0.30836 | 0.924 | 0.44229 | 0.28222 | 0.4877  | 0.61115 | 0.924 | 0.39751 | 0.29923 | 0.38273 | 0.35221 |
| 0.928 | 0.41288 | 0.39551 | 0.30923 | 0.928 | 0.44229 | 0.28322 | 0.48625 | 0.61053 | 0.928 | 0.39832 | 0.30065 | 0.38426 | 0.35397 |
| 0.932 | 0.41369 | 0.39604 | 0.30988 | 0.932 | 0.44229 | 0.28423 | 0.48517 | 0.60992 | 0.932 | 0.39856 | 0.30159 | 0.3858  | 0.35546 |
| 0.936 | 0.4141  | 0.39684 | 0.31074 | 0.936 | 0.44229 | 0.28548 | 0.48408 | 0.60869 | 0.936 | 0.39921 | 0.30301 | 0.38733 | 0.35687 |
| 0.94  | 0.41491 | 0.39737 | 0.31182 | 0.94  | 0.44274 | 0.28674 | 0.483   | 0.60807 | 0.94  | 0.39945 | 0.30395 | 0.38887 | 0.35846 |
| 0.944 | 0.41531 | 0.39791 | 0.31268 | 0.944 | 0.44274 | 0.28799 | 0.48155 | 0.60684 | 0.944 | 0.39961 | 0.30537 | 0.38964 | 0.35995 |
| 0.948 | 0.41572 | 0.39844 | 0.31355 | 0.948 | 0.44274 | 0.289   | 0.48046 | 0.60561 | 0.948 | 0.39961 | 0.30631 | 0.39117 | 0.36136 |
| 0.952 | 0.41612 | 0.39897 | 0.31462 | 0.952 | 0.44229 | 0.29025 | 0.47902 | 0.60438 | 0.952 | 0.39969 | 0.30678 | 0.39194 | 0.3626  |
| 0.956 | 0.41693 | 0.3995  | 0.31549 | 0.956 | 0.44229 | 0.29176 | 0.47793 | 0.60315 | 0.956 | 0.39994 | 0.30772 | 0.39347 | 0.36427 |
| 0.96  | 0.41733 | 0.40004 | 0.31678 | 0.96  | 0.44229 | 0.29302 | 0.47685 | 0.6013  | 0.96  | 0.39985 | 0.30867 | 0.39424 | 0.36568 |
| 0.964 | 0.41774 | 0.4003  | 0.31786 | 0.964 | 0.44184 | 0.29427 | 0.4754  | 0.59946 | 0.964 | 0.39961 | 0.30961 | 0.39501 | 0.36682 |
| 0.968 | 0.41855 | 0.40084 | 0.31937 | 0.968 | 0.44184 | 0.29578 | 0.47467 | 0.59823 | 0.968 | 0.39961 | 0.31056 | 0.39655 | 0.36832 |
| 0.972 | 0.41895 | 0.40137 | 0.32067 | 0.972 | 0.44184 | 0.29729 | 0.47395 | 0.59638 | 0.972 | 0.39977 | 0.3115  | 0.39731 | 0.36982 |
| 0.976 | 0.41936 | 0.4019  | 0.32196 | 0.976 | 0.44184 | 0.29854 | 0.47287 | 0.59515 | 0.976 | 0.39977 | 0.31244 | 0.39808 | 0.37131 |
| 0.98  | 0.42017 | 0.40244 | 0.32348 | 0.98  | 0.44184 | 0.3003  | 0.47214 | 0.59331 | 0.98  | 0.4001  | 0.31339 | 0.39962 | 0.37316 |
| 0.984 | 0.42098 | 0.40297 | 0.3252  | 0.984 | 0.44184 | 0.30181 | 0.47142 | 0.59146 | 0.984 | 0.40002 | 0.31433 | 0.40038 | 0.37466 |
| 0.988 | 0.42138 | 0.4035  | 0.32671 | 0.988 | 0.44274 | 0.30356 | 0.47106 | 0.59023 | 0.988 | 0.40042 | 0.31528 | 0.40192 | 0.37633 |
| 0.992 | 0.42219 | 0.40404 | 0.32866 | 0.992 | 0.44274 | 0.30532 | 0.47069 | 0.58838 | 0.992 | 0.4009  | 0.31669 | 0.40269 | 0.378   |
| 0.996 | 0.423   | 0.40457 | 0.33038 | 0.996 | 0.44274 | 0.30683 | 0.46997 | 0.58715 | 0.996 | 0.40058 | 0.31716 | 0.40345 | 0.37959 |
| 1     | 0.42381 | 0.40537 | 0.33254 | 1     | 0.44364 | 0.30884 | 0.46961 | 0.58592 | 1     | 0.40139 | 0.31858 | 0.40576 | 0.38126 |
| 1.004 | 0.42462 | 0.40643 | 0.3347  | 1.004 | 0.44454 | 0.31085 | 0.46925 | 0.58469 | 1.004 | 0.4022  | 0.31999 | 0.40653 | 0.38329 |
| 1.008 | 0.42583 | 0.4075  | 0.33686 | 1.008 | 0.445   | 0.31311 | 0.46925 | 0.58346 | 1.008 | 0.40284 | 0.32141 | 0.40806 | 0.38522 |
| 1.012 | 0.42664 | 0.4083  | 0.33902 | 1.012 | 0.4459  | 0.31512 | 0.46889 | 0.58223 | 1.012 | 0.40389 | 0.32283 | 0.4096  | 0.38734 |
| 1.016 | 0.42826 | 0.40937 | 0.34139 | 1.016 | 0.4468  | 0.31738 | 0.46852 | 0.58162 | 1.016 | 0.40462 | 0.32424 | 0.41113 | 0.38936 |
| 1.02  | 0.42988 | 0.4107  | 0.3442  | 1.02  | 0.44815 | 0.31964 | 0.46889 | 0.581   | 1.02  | 0.40599 | 0.32613 | 0.41344 | 0.39165 |
| 1.024 | 0.4315  | 0.4123  | 0.347   | 1.024 | 0.44995 | 0.32215 | 0.46925 | 0.58039 | 1.024 | 0.40753 | 0.32849 | 0.41497 | 0.39394 |
| 1.028 | 0.43231 | 0.41336 | 0.34938 | 1.028 | 0.45131 | 0.32441 | 0.46925 | 0.57915 | 1.028 | 0.40866 | 0.3299  | 0.41727 | 0.39597 |
| 1.032 | 0.43392 | 0.41523 | 0.3524  | 1.032 | 0.45266 | 0.32717 | 0.46997 | 0.57977 | 1.032 | 0.41044 | 0.33179 | 0.41958 | 0.39852 |
| 1.036 | 0.43554 | 0.41736 | 0.35564 | 1.036 | 0.45491 | 0.33019 | 0.47069 | 0.57915 | 1.036 | 0.41214 | 0.33415 | 0.42188 | 0.40125 |
| 1.04  | 0.43757 | 0.41923 | 0.35888 | 1.04  | 0.45672 | 0.3332  | 0.47178 | 0.57915 | 1.04  | 0.41407 | 0.33651 | 0.42418 | 0.40416 |
| 1.044 | 0.43959 | 0.42136 | 0.36233 | 1.044 | 0.45897 | 0.33596 | 0.4725  | 0.57915 | 1.044 | 0.41618 | 0.33934 | 0.42649 | 0.40697 |
| 1.048 | 0.44161 | 0.42349 | 0.36579 | 1.048 | 0.46078 | 0.33923 | 0.47395 | 0.57977 | 1.048 | 0.41892 | 0.3417  | 0.42879 | 0.40997 |
| 1.052 | 0.44404 | 0.42589 | 0.36945 | 1.052 | 0.46393 | 0.34274 | 0.47504 | 0.58039 | 1.052 | 0.42159 | 0.345   | 0.43186 | 0.4134  |
| 1.056 | 0.44647 | 0.42856 | 0.37334 | 1.056 | 0.46664 | 0.34651 | 0.47685 | 0.58162 | 1.056 | 0.42458 | 0.34784 | 0.43493 | 0.41684 |
| 1.06  | 0.4489  | 0.43095 | 0.37701 | 1.06  | 0.46934 | 0.35003 | 0.47829 | 0.58223 | 1.06  | 0.42716 | 0.35114 | 0.43724 | 0.42036 |
| 1.064 | 0.45173 | 0.43389 | 0.38133 | 1.064 | 0.47295 | 0.35354 | 0.47974 | 0.58346 | 1.064 | 0.43007 | 0.35444 | 0.44107 | 0.42406 |
| 1.068 | 0.45456 | 0.43709 | 0.38564 | 1.068 | 0.4761  | 0.35781 | 0.48227 | 0.58469 | 1.068 | 0.43355 | 0.35822 | 0.44415 | 0.42811 |
| 1.072 | 0.4582  | 0.44002 | 0.39018 | 1.072 | 0.47971 | 0.36183 | 0.48444 | 0.58592 | 1.072 | 0.4371  | 0.36199 | 0.44798 | 0.43233 |
| 1.076 | 0.46144 | 0.44348 | 0.39471 | 1.076 | 0.48287 | 0.3661  | 0.48661 | 0.58777 | 1.076 | 0.44009 | 0.36577 | 0.45182 | 0.43629 |
| 1.08  | 0.46468 | 0.44641 | 0.39946 | 1.08  | 0.48647 | 0.37037 | 0.48915 | 0.58961 | 1.08  | 0.44413 | 0.36954 | 0.45566 | 0.44052 |
| 1.084 | 0.46832 | 0.45041 | 0.40443 | 1.084 | 0.49143 | 0.37539 | 0.4924  | 0.59208 | 1.084 | 0.44817 | 0.37426 | 0.4595  | 0.44528 |
| 1.088 | 0.47236 | 0.45468 | 0.40961 | 1.088 | 0.49549 | 0.37991 | 0.4953  | 0.59392 | 1.088 | 0.45221 | 0.37851 | 0.46411 | 0.44968 |
| 1.092 | 0.47601 | 0.45841 | 0.41457 | 1.092 | 0.5     | 0.38468 | 0.49783 | 0.59638 | 1.092 | 0.45625 | 0.38276 | 0.46795 | 0.45408 |
| 1.096 | 0.48005 | 0.46267 | 0.41997 | 1.096 | 0.50496 | 0.38971 | 0.50145 | 0.59884 | 1.096 | 0.4611  | 0.38795 | 0.47255 | 0.45936 |
| 1.1   | 0.4845  | 0.46747 | 0.42558 | 1.1   | 0.50992 | 0.39523 | 0.5047  | 0.60192 | 1.1   | 0.46514 | 0.39267 | 0.47716 | 0.46377 |
| 1.104 | 0.48855 | 0.472   | 0.43119 | 1.104 | 0.51488 | 0.40051 | 0.50796 | 0.60438 | 1.104 | 0.46998 | 0.39786 | 0.48177 | 0.46905 |
| 1.108 | 0.4934  | 0.4768  | 0.43681 | 1.108 | 0.52029 | 0.40603 | 0.51158 | 0.60746 | 1.108 | 0.47483 | 0.40352 | 0.48714 | 0.47433 |
| 1.112 | 0.49826 | 0.48186 | 0.44263 | 1.112 | 0.5257  |         |         |         |       |         |         |         |         |



|       |         |         |         |       |         |         |         |         |       |         |         |         |         |
|-------|---------|---------|---------|-------|---------|---------|---------|---------|-------|---------|---------|---------|---------|
| 1.224 | 0.71757 | 0.71588 | 0.69282 | 1.224 | 0.77322 | 0.67451 | 0.72069 | 0.77727 | 1.224 | 0.71803 | 0.66967 | 0.72131 | 0.72    |
| 1.228 | 0.7293  | 0.72787 | 0.70556 | 1.228 | 0.78584 | 0.68832 | 0.73227 | 0.7865  | 1.228 | 0.73014 | 0.68336 | 0.73359 | 0.73232 |
| 1.232 | 0.74104 | 0.74013 | 0.71873 | 1.232 | 0.79892 | 0.70239 | 0.74421 | 0.79573 | 1.232 | 0.74226 | 0.69751 | 0.74587 | 0.74377 |
| 1.236 | 0.75277 | 0.75239 | 0.73168 | 1.236 | 0.81199 | 0.71645 | 0.75579 | 0.80496 | 1.236 | 0.75519 | 0.71167 | 0.75739 | 0.75698 |
| 1.24  | 0.76532 | 0.76545 | 0.74528 | 1.24  | 0.82552 | 0.73127 | 0.76809 | 0.8148  | 1.24  | 0.76812 | 0.7263  | 0.77044 | 0.76931 |
| 1.244 | 0.77826 | 0.77878 | 0.75953 | 1.244 | 0.8404  | 0.74609 | 0.78075 | 0.82526 | 1.244 | 0.78185 | 0.7414  | 0.78349 | 0.78251 |
| 1.248 | 0.79162 | 0.79264 | 0.77442 | 1.248 | 0.85482 | 0.76191 | 0.79414 | 0.83634 | 1.248 | 0.79478 | 0.75697 | 0.79655 | 0.7966  |
| 1.252 | 0.80497 | 0.80596 | 0.78888 | 1.252 | 0.86925 | 0.77773 | 0.80753 | 0.8468  | 1.252 | 0.80852 | 0.77254 | 0.8096  | 0.80893 |
| 1.256 | 0.81913 | 0.82062 | 0.80443 | 1.256 | 0.88368 | 0.79406 | 0.82127 | 0.85787 | 1.256 | 0.82306 | 0.78906 | 0.82418 | 0.8239  |
| 1.26  | 0.8337  | 0.83528 | 0.82018 | 1.26  | 0.89946 | 0.81063 | 0.83611 | 0.86956 | 1.26  | 0.8376  | 0.80605 | 0.838   | 0.83887 |
| 1.264 | 0.84867 | 0.85021 | 0.83594 | 1.264 | 0.91524 | 0.82771 | 0.85058 | 0.88125 | 1.264 | 0.85215 | 0.82304 | 0.85182 | 0.85383 |
| 1.268 | 0.86404 | 0.8654  | 0.85235 | 1.268 | 0.93102 | 0.84504 | 0.86541 | 0.89294 | 1.268 | 0.86669 | 0.84097 | 0.86718 | 0.86792 |
| 1.272 | 0.87902 | 0.88113 | 0.8694  | 1.272 | 0.9477  | 0.86287 | 0.88061 | 0.90463 | 1.272 | 0.88204 | 0.85937 | 0.88253 | 0.88377 |
| 1.276 | 0.8952  | 0.89739 | 0.88667 | 1.276 | 0.96483 | 0.88146 | 0.89653 | 0.91694 | 1.276 | 0.89901 | 0.87778 | 0.89789 | 0.89962 |
| 1.28  | 0.91179 | 0.91364 | 0.90437 | 1.28  | 0.98242 | 0.90029 | 0.91317 | 0.93047 | 1.28  | 0.91436 | 0.89713 | 0.91401 | 0.91547 |
| 1.284 | 0.92798 | 0.9299  | 0.9225  | 1.284 | 1       | 0.91863 | 0.92945 | 0.9434  | 1.284 | 0.93052 | 0.91647 | 0.93013 | 0.93132 |
| 1.288 | 0.94538 | 0.94723 | 0.94172 | 1.288 | ---     | 0.93922 | 0.94682 | 0.95816 | 1.288 | 0.94829 | 0.93677 | 0.94702 | 0.94893 |
| 1.292 | 0.96358 | 0.96455 | 0.96071 | 1.292 | ---     | 0.95906 | 0.96418 | 0.9717  | 1.292 | 0.96526 | 0.95753 | 0.96468 | 0.96654 |
| 1.296 | 0.98139 | 0.98214 | 0.98014 | 1.296 | ---     | 0.97966 | 0.98191 | 0.98585 | 1.296 | 0.98223 | 0.97829 | 0.98234 | 0.98327 |
| 1.3   | 1       | 1       | 1       | 1.3   | ---     | 1       | 1       | 1       | 1.3   | 1       | 1       | 1       | 1       |

Water-ABS (Spring)

|       |          |          |          |
|-------|----------|----------|----------|
| 0.004 | 0.07595  | 0.06754  | 0.08394  |
| 0.008 | 0.07006  | 0.06324  | 0.07819  |
| 0.012 | 0.06537  | 0.05973  | 0.07322  |
| 0.016 | 0.06162  | 0.05671  | 0.0693   |
| 0.02  | 0.05808  | 0.05448  | 0.06616  |
| 0.024 | 0.05537  | 0.05225  | 0.06328  |
| 0.028 | 0.05298  | 0.05065  | 0.06093  |
| 0.032 | 0.05074  | 0.04922  | 0.05884  |
| 0.036 | 0.04891  | 0.04795  | 0.05672  |
| 0.04  | 0.04719  | 0.04651  | 0.05499  |
| 0.044 | 0.04568  | 0.04572  | 0.05361  |
| 0.048 | 0.04417  | 0.0446   | 0.05178  |
| 0.052 | 0.04277  | 0.04364  | 0.05081  |
| 0.056 | 0.04141  | 0.04269  | 0.04932  |
| 0.06  | 0.04048  | 0.04205  | 0.04869  |
| 0.064 | 0.03933  | 0.04126  | 0.04783  |
| 0.068 | 0.03824  | 0.0403   | 0.04673  |
| 0.072 | 0.03709  | 0.03966  | 0.04589  |
| 0.076 | 0.03605  | 0.03903  | 0.04524  |
| 0.08  | 0.03516  | 0.03823  | 0.04443  |
| 0.084 | 0.03417  | 0.03759  | 0.04354  |
| 0.088 | 0.03318  | 0.03664  | 0.04276  |
| 0.092 | 0.03251  | 0.036    | 0.04184  |
| 0.096 | 0.03162  | 0.03536  | 0.04095  |
| 0.1   | 0.03063  | 0.03472  | 0.03988  |
| 0.104 | 0.02985  | 0.03393  | 0.03904  |
| 0.108 | 0.0287   | 0.03329  | 0.03768  |
| 0.112 | 0.02776  | 0.03249  | 0.03648  |
| 0.116 | 0.02667  | 0.03186  | 0.03549  |
| 0.12  | 0.02568  | 0.03106  | 0.03462  |
| 0.124 | 0.0248   | 0.03026  | 0.03376  |
| 0.128 | 0.02375  | 0.02963  | 0.0329   |
| 0.132 | 0.02256  | 0.02883  | 0.03188  |
| 0.136 | 0.02146  | 0.02803  | 0.03096  |
| 0.14  | 0.02058  | 0.02724  | 0.02986  |
| 0.144 | 0.01927  | 0.02628  | 0.02884  |
| 0.148 | 0.01834  | 0.02565  | 0.02759  |
| 0.152 | 0.01735  | 0.02469  | 0.02649  |
| 0.156 | 0.0163   | 0.02389  | 0.02555  |
| 0.16  | 0.01537  | 0.02294  | 0.02445  |
| 0.164 | 0.01417  | 0.02198  | 0.02327  |
| 0.168 | 0.01318  | 0.02119  | 0.02212  |
| 0.172 | 0.01224  | 0.02039  | 0.02082  |
| 0.176 | 0.01136  | 0.01943  | 0.01951  |
| 0.18  | 0.01021  | 0.01848  | 0.01828  |
| 0.184 | 0.00932  | 0.01752  | 0.01721  |
| 0.188 | 0.00833  | 0.01641  | 0.01616  |
| 0.192 | 0.0075   | 0.01545  | 0.01527  |
| 0.196 | 0.00646  | 0.0145   | 0.01412  |
| 0.2   | 0.00573  | 0.01354  | 0.013    |
| 0.204 | 0.0051   | 0.01242  | 0.01192  |
| 0.208 | 0.00427  | 0.01163  | 0.01093  |
| 0.212 | 0.00349  | 0.01035  | 0.0097   |
| 0.216 | 0.00292  | 0.0094   | 0.00858  |
| 0.22  | 0.0024   | 0.0086   | 0.00758  |
| 0.224 | 0.00167  | 0.00733  | 0.00654  |
| 0.228 | 0.00109  | 0.00637  | 0.00541  |
| 0.232 | 7.29E-04 | 0.00542  | 0.00445  |
| 0.236 | 4.17E-04 | 0.00446  | 0.00366  |
| 0.24  | 2.08E-04 | 0.00366  | 0.00272  |
| 0.244 | 5.21E-05 | 0.00271  | 0.00201  |
| 0.248 | 0        | 0.00207  | 0.00136  |
| 0.252 | 2.08E-04 | 0.00127  | 7.58E-04 |
| 0.256 | 3.13E-04 | 6.37E-04 | 4.18E-04 |
| 0.26  | 5.21E-04 | 3.19E-04 | 0        |
| 0.264 | 0.0012   | 0        | 0        |
| 0.268 | 0.00193  | 0        | 1.83E-04 |
| 0.272 | 0.00266  | 1.59E-04 | 5.49E-04 |
| 0.276 | 0.00385  | 4.78E-04 | 0.00107  |
| 0.28  | 0.0049   | 0.00112  | 0.00212  |
| 0.284 | 0.00656  | 0.00207  | 0.00343  |
| 0.288 | 0.00844  | 0.0035   | 0.00547  |
| 0.292 | 0.01094  | 0.00558  | 0.00785  |
| 0.296 | 0.01375  | 0.00781  | 0.01075  |
| 0.3   | 0.01719  | 0.01099  | 0.01444  |
| 0.304 | 0.02136  | 0.01465  | 0.01891  |
| 0.308 | 0.02615  | 0.01911  | 0.02406  |
| 0.312 | 0.03183  | 0.02469  | 0.02989  |
| 0.316 | 0.0387   | 0.03106  | 0.03672  |
| 0.32  | 0.04667  | 0.03839  | 0.04448  |

Water-ABS (Summer)

|       |          |          |          |
|-------|----------|----------|----------|
| 0.004 | 0.12661  | 0.10357  | 0.12237  |
| 0.008 | 0.11982  | 0.09803  | 0.11297  |
| 0.012 | 0.11444  | 0.09283  | 0.10571  |
| 0.016 | 0.10935  | 0.08798  | 0.09973  |
| 0.02  | 0.10511  | 0.08348  | 0.09503  |
| 0.024 | 0.10086  | 0.07932  | 0.09075  |
| 0.028 | 0.09775  | 0.07586  | 0.08691  |
| 0.032 | 0.09464  | 0.07239  | 0.08349  |
| 0.036 | 0.09153  | 0.06893  | 0.0805   |
| 0.04  | 0.08898  | 0.06581  | 0.07794  |
| 0.044 | 0.08643  | 0.06304  | 0.07537  |
| 0.048 | 0.08389  | 0.06027  | 0.07324  |
| 0.052 | 0.08162  | 0.0575   | 0.07153  |
| 0.056 | 0.07964  | 0.05438  | 0.06982  |
| 0.06  | 0.07795  | 0.0523   | 0.06811  |
| 0.064 | 0.07597  | 0.04953  | 0.0664   |
| 0.068 | 0.07427  | 0.04711  | 0.06512  |
| 0.072 | 0.07229  | 0.04468  | 0.06332  |
| 0.076 | 0.07059  | 0.0426   | 0.06221  |
| 0.08  | 0.06861  | 0.04053  | 0.0608   |
| 0.084 | 0.06691  | 0.03845  | 0.05948  |
| 0.088 | 0.06521  | 0.03637  | 0.05832  |
| 0.092 | 0.06352  | 0.03395  | 0.05708  |
| 0.096 | 0.0621   | 0.03221  | 0.05589  |
| 0.1   | 0.06012  | 0.03014  | 0.05414  |
| 0.104 | 0.05871  | 0.0284   | 0.0529   |
| 0.108 | 0.05673  | 0.02632  | 0.05149  |
| 0.112 | 0.05503  | 0.02459  | 0.05012  |
| 0.116 | 0.05333  | 0.02286  | 0.04867  |
| 0.12  | 0.05163  | 0.02113  | 0.04739  |
| 0.124 | 0.04996  | 0.01974  | 0.04602  |
| 0.128 | 0.04815  | 0.01801  | 0.04457  |
| 0.132 | 0.0464   | 0.01663  | 0.04277  |
| 0.136 | 0.04462  | 0.01524  | 0.04132  |
| 0.14  | 0.04283  | 0.01386  | 0.03995  |
| 0.144 | 0.04131  | 0.01247  | 0.0382   |
| 0.148 | 0.03938  | 0.01143  | 0.03636  |
| 0.152 | 0.03749  | 0.01005  | 0.03457  |
| 0.156 | 0.03573  | 0.00935  | 0.03273  |
| 0.16  | 0.03418  | 0.00797  | 0.03123  |
| 0.164 | 0.03234  | 0.00693  | 0.0294   |
| 0.168 | 0.03084  | 0.00623  | 0.02786  |
| 0.172 | 0.02903  | 0.00554  | 0.02602  |
| 0.176 | 0.02716  | 0.0045   | 0.02423  |
| 0.18  | 0.02532  | 0.00381  | 0.02265  |
| 0.184 | 0.02377  | 0.00312  | 0.02111  |
| 0.188 | 0.02215  | 0.00277  | 0.01948  |
| 0.192 | 0.02048  | 0.00242  | 0.01782  |
| 0.196 | 0.01864  | 0.00173  | 0.01615  |
| 0.2   | 0.01703  | 0.00104  | 0.01466  |
| 0.204 | 0.01545  | 0.00104  | 0.01303  |
| 0.208 | 0.01389  | 6.93E-04 | 0.01137  |
| 0.212 | 0.01225  | 3.46E-04 | 0.00978  |
| 0.216 | 0.01064  | 0        | 0.00825  |
| 0.22  | 0.00928  | 0        | 0.00671  |
| 0.224 | 0.00781  | 0        | 0.00551  |
| 0.228 | 0.00631  | 0        | 0.00414  |
| 0.232 | 0.00504  | 3.46E-04 | 0.00299  |
| 0.236 | 0.0039   | 6.93E-04 | 0.00209  |
| 0.24  | 0.00291  | 0.00139  | 9.83E-04 |
| 0.244 | 0.00173  | 0.00208  | 4.27E-04 |
| 0.248 | 9.34E-04 | 0.00312  | 0        |
| 0.252 | 4.53E-04 | 0.0045   | 2.56E-04 |
| 0.256 | 1.41E-04 | 0.00589  | 3.85E-04 |
| 0.26  | 0        | 0.00762  | 0.00111  |
| 0.264 | 1.13E-04 | 0.01005  | 0.00214  |
| 0.268 | 6.22E-04 | 0.01247  | 0.0038   |
| 0.272 | 0.00127  | 0.01524  | 0.00598  |
| 0.276 | 0.00235  | 0.01836  | 0.00902  |
| 0.28  | 0.00419  | 0.02182  | 0.0129   |
| 0.284 | 0.0062   | 0.02563  | 0.01765  |
| 0.288 | 0.00905  | 0.03014  | 0.02359  |
| 0.292 | 0.01234  | 0.03533  | 0.03029  |
| 0.296 | 0.01647  | 0.04122  | 0.03828  |
| 0.3   | 0.02125  | 0.0478   | 0.04777  |
| 0.304 | 0.02696  | 0.05507  | 0.05879  |
| 0.308 | 0.03375  | 0.06339  | 0.07067  |
| 0.312 | 0.04111  | 0.07274  | 0.08434  |
| 0.316 | 0.04977  | 0.08313  | 0.09973  |
| 0.32  | 0.05956  | 0.09491  | 0.11639  |

Water-ABS (Autumn)

|       |          |          |          |          |
|-------|----------|----------|----------|----------|
| 0.004 | 0.08969  | 0.05695  | 0.03491  | 0.02975  |
| 0.008 | 0.08342  | 0.05423  | 0.03095  | 0.02739  |
| 0.012 | 0.07838  | 0.0515   | 0.02668  | 0.02528  |
| 0.016 | 0.07436  | 0.04908  | 0.0249   | 0.02377  |
| 0.02  | 0.07096  | 0.04635  | 0.02338  | 0.02232  |
| 0.024 | 0.0683   | 0.04453  | 0.02175  | 0.02106  |
| 0.028 | 0.06604  | 0.04302  | 0.02018  | 0.01993  |
| 0.032 | 0.06403  | 0.0415   | 0.01891  | 0.01895  |
| 0.036 | 0.06231  | 0.03999  | 0.01733  | 0.01804  |
| 0.04  | 0.06088  | 0.03847  | 0.01596  | 0.01706  |
| 0.044 | 0.05952  | 0.03696  | 0.01484  | 0.01621  |
| 0.048 | 0.05829  | 0.03605  | 0.01464  | 0.01558  |
| 0.052 | 0.05715  | 0.03484  | 0.01362  | 0.01483  |
| 0.056 | 0.05616  | 0.03363  | 0.01199  | 0.01413  |
| 0.06  | 0.05534  | 0.03272  | 0.01235  | 0.0136   |
| 0.064 | 0.05473  | 0.03181  | 0.01133  | 0.01287  |
| 0.068 | 0.05382  | 0.0309   | 0.01032  | 0.01225  |
| 0.072 | 0.05296  | 0.02999  | 0.00996  | 0.01155  |
| 0.076 | 0.05198  | 0.02878  | 0.00905  | 0.01108  |
| 0.08  | 0.05116  | 0.02817  | 0.00864  | 0.01020  |
| 0.084 | 0.05046  | 0.02726  | 0.00849  | 0.00951  |
| 0.088 | 0.04973  | 0.02605  | 0.00783  | 0.00885  |
| 0.092 | 0.04882  | 0.02514  | 0.00752  | 0.00822  |
| 0.096 | 0.04817  | 0.02454  | 0.00752  | 0.00759  |
| 0.1   | 0.04759  | 0.02363  | 0.00717  | 0.00693  |
| 0.104 | 0.04657  | 0.02242  | 0.00691  | 0.0063   |
| 0.108 | 0.04571  | 0.02151  | 0.0062   | 0.0057   |
| 0.112 | 0.04481  | 0.0206   | 0.006    | 0.00526  |
| 0.116 | 0.04395  | 0.01969  | 0.00569  | 0.0046   |
| 0.12  | 0.04304  | 0.01848  | 0.00493  | 0.00403  |
| 0.124 | 0.04214  | 0.01787  | 0.00442  | 0.00346  |
| 0.128 | 0.04124  | 0.01696  | 0.00391  | 0.00302  |
| 0.132 | 0.03993  | 0.01575  | 0.00325  | 0.00246  |
| 0.136 | 0.03894  | 0.01515  | 0.00295  | 0.00211  |
| 0.14  | 0.03784  | 0.01424  | 0.00244  | 0.00161  |
| 0.144 | 0.03653  | 0.01363  | 0.00183  | 0.00139  |
| 0.148 | 0.0353   | 0.01303  | 0.00173  | 0.00104  |
| 0.152 | 0.03411  | 0.01242  | 9.15E-04 | 7.87E-04 |
| 0.156 | 0.03263  | 0.01181  | 7.62E-04 | 5.04E-04 |
| 0.16  | 0.03128  | 0.01121  | 7.11E-04 | 3.15E-04 |
| 0.164 | 0.03001  | 0.0106   | 3.05E-04 | 1.57E-04 |
| 0.168 | 0.02849  | 0.00969  | 3.56E-04 | 0        |
| 0.172 | 0.02701  | 0.00909  | 5.08E-04 | 9.44E-05 |
| 0.176 | 0.02554  | 0.00788  | 5.08E-04 | 2.52E-04 |
| 0.18  | 0.02402  | 0.00727  | 4.57E-04 | 2.52E-04 |
| 0.184 | 0.02234  | 0.00666  | 0        | 1.89E-04 |
| 0.188 | 0.02091  | 0.00606  | 5.08E-04 | 3.15E-04 |
| 0.192 | 0.01951  | 0.00545  | 2.54E-04 | 3.35E-04 |
| 0.196 | 0.01783  | 0.00454  | 7.62E-04 | 6.93E-04 |
| 0.2   | 0.01668  | 0.00394  | 6.61E-04 | 9.13E-04 |
| 0.204 | 0.01509  | 0.00333  | 0.00152  | 0.00116  |
| 0.208 | 0.01369  | 0.00273  | 0.00142  | 0.00148  |
| 0.212 | 0.0123   | 0.00212  | 0.00183  | 0.00186  |
| 0.216 | 0.0109   | 6.06E-04 | 0.00208  | 0.0023   |
| 0.22  | 0.00967  | 3.03E-04 | 0.0029   | 0.00283  |
| 0.224 | 0.00828  | 0        | 0.00361  | 0.00362  |
| 0.228 | 0.00693  | 3.03E-04 | 0.00407  | 0.00447  |
| 0.232 | 0.00586  | 6.06E-04 | 0.00452  | 0.0056   |
| 0.236 | 0.00476  | 6.06E-04 | 0.00584  | 0.00696  |
| 0.24  | 0.00361  | 0.00121  | 0.00696  | 0.00869  |
| 0.244 | 0.00262  | 0.00182  | 0.00828  | 0.01048  |
| 0.248 | 0.00184  | 0.00273  | 0.00961  | 0.01287  |
| 0.252 | 0.00127  | 0.00454  | 0.01123  | 0.01571  |
| 0.256 | 6.15E-04 | 0.00636  | 0.01311  | 0.01898  |
| 0.26  | 2.05E-04 | 0.00879  | 0.01535  | 0.02277  |
| 0.264 | 0        | 0.01181  | 0.01779  | 0.02868  |
| 0.268 | 0        | 0.01515  | 0.02058  | 0.03331  |
| 0.272 | 3.28E-04 | 0.01909  | 0.02368  | 0.03907  |
| 0.276 | 7.79E-04 | 0.02393  | 0.02678  | 0.04555  |
| 0.28  | 0.00176  | 0.02999  | 0.03131  | 0.05307  |
| 0.284 | 0.00303  | 0.03696  | 0.03598  | 0.0617   |
| 0.288 | 0.00476  | 0.04483  | 0.04101  | 0.07143  |
| 0.292 | 0.00709  | 0.05362  | 0.04676  | 0.08216  |
| 0.296 | 0.00976  | 0.06362  | 0.05321  | 0.09415  |
| 0.3   | 0.01299  | 0.07513  | 0.06032  | 0.10775  |
| 0.304 | 0.01685  | 0.08755  | 0.06846  | 0.12249  |
| 0.308 | 0.02156  | 0.10148  | 0.07755  | 0.13867  |
| 0.312 | 0.02673  | 0.11603  | 0.08751  | 0.15636  |
| 0.316 | 0.03279  | 0.13238  | 0.09869  | 0.17587  |
| 0.32  | 0.03956  | 0.14995  | 0.11094  | 0.19634  |

|       |         |         |         |       |         |         |         |         |       |         |         |         |         |
|-------|---------|---------|---------|-------|---------|---------|---------|---------|-------|---------|---------|---------|---------|
| 0.324 | 0.05579 | 0.04683 | 0.05311 | 0.324 | 0.07002 | 0.10772 | 0.13391 | 0.15938 | 0.324 | 0.04727 | 0.16843 | 0.12405 | 0.21774 |
| 0.328 | 0.06657 | 0.05655 | 0.06302 | 0.328 | 0.08219 | 0.12158 | 0.15271 | 0.17786 | 0.328 | 0.056   | 0.18812 | 0.13859 | 0.24072 |
| 0.332 | 0.07866 | 0.06754 | 0.07401 | 0.332 | 0.0952  | 0.13647 | 0.17194 | 0.19712 | 0.332 | 0.06571 | 0.20812 | 0.15358 | 0.26433 |
| 0.336 | 0.09194 | 0.0798  | 0.08604 | 0.336 | 0.10907 | 0.15241 | 0.19202 | 0.21738 | 0.336 | 0.07604 | 0.22902 | 0.16994 | 0.28826 |
| 0.34  | 0.10668 | 0.09334 | 0.09911 | 0.34  | 0.12406 | 0.16903 | 0.21253 | 0.23814 | 0.34  | 0.08719 | 0.25053 | 0.18692 | 0.31249 |
| 0.344 | 0.12304 | 0.10831 | 0.11376 | 0.344 | 0.14019 | 0.18635 | 0.23218 | 0.2594  | 0.344 | 0.09892 | 0.27204 | 0.20471 | 0.33642 |
| 0.348 | 0.14075 | 0.12488 | 0.12945 | 0.348 | 0.15745 | 0.20471 | 0.25184 | 0.28141 | 0.348 | 0.1113  | 0.29355 | 0.22254 | 0.36003 |
| 0.352 | 0.15971 | 0.14288 | 0.14671 | 0.352 | 0.17556 | 0.22307 | 0.27021 | 0.30342 | 0.352 | 0.12433 | 0.31536 | 0.24074 | 0.38301 |
| 0.356 | 0.18008 | 0.16231 | 0.16501 | 0.356 | 0.19451 | 0.24143 | 0.28773 | 0.32568 | 0.356 | 0.13716 | 0.33656 | 0.25853 | 0.40473 |
| 0.36  | 0.20201 | 0.18382 | 0.18488 | 0.36  | 0.21516 | 0.26082 | 0.30439 | 0.34844 | 0.36  | 0.15041 | 0.35807 | 0.2758  | 0.42613 |
| 0.364 | 0.22618 | 0.20771 | 0.20764 | 0.364 | 0.23752 | 0.28126 | 0.32106 | 0.3722  | 0.364 | 0.16414 | 0.3814  | 0.29359 | 0.44691 |
| 0.368 | 0.25212 | 0.23367 | 0.23169 | 0.368 | 0.26156 | 0.30204 | 0.33601 | 0.39696 | 0.368 | 0.17767 | 0.40351 | 0.31036 | 0.46674 |
| 0.372 | 0.28062 | 0.26219 | 0.25837 | 0.372 | 0.28703 | 0.32283 | 0.35054 | 0.42348 | 0.372 | 0.19078 | 0.42684 | 0.32662 | 0.48626 |
| 0.376 | 0.31291 | 0.29388 | 0.28818 | 0.376 | 0.31532 | 0.34603 | 0.36549 | 0.45249 | 0.376 | 0.20431 | 0.45168 | 0.3439  | 0.50672 |
| 0.38  | 0.34886 | 0.3294  | 0.32165 | 0.38  | 0.34673 | 0.37201 | 0.38173 | 0.48476 | 0.38  | 0.21866 | 0.47925 | 0.3622  | 0.52844 |
| 0.384 | 0.38949 | 0.36907 | 0.35983 | 0.384 | 0.38181 | 0.40111 | 0.39882 | 0.52027 | 0.384 | 0.23383 | 0.50924 | 0.38151 | 0.55268 |
| 0.388 | 0.43481 | 0.41255 | 0.40167 | 0.388 | 0.42057 | 0.43298 | 0.41762 | 0.55929 | 0.388 | 0.25023 | 0.54196 | 0.40286 | 0.57881 |
| 0.392 | 0.48482 | 0.46113 | 0.44874 | 0.392 | 0.46386 | 0.46865 | 0.43941 | 0.60256 | 0.392 | 0.26826 | 0.57861 | 0.42573 | 0.60903 |
| 0.396 | 0.53899 | 0.51354 | 0.5     | 0.396 | 0.5111  | 0.50779 | 0.46334 | 0.64933 | 0.396 | 0.28876 | 0.6189  | 0.45114 | 0.64303 |
| 0.4   | 0.59577 | 0.56977 | 0.55544 | 0.4   | 0.56203 | 0.55005 | 0.48983 | 0.69861 | 0.4   | 0.31131 | 0.66253 | 0.47858 | 0.67986 |
| 0.404 | 0.65463 | 0.62886 | 0.61349 | 0.404 | 0.61635 | 0.59404 | 0.51846 | 0.74938 | 0.404 | 0.33631 | 0.70857 | 0.50704 | 0.71952 |
| 0.408 | 0.71402 | 0.68923 | 0.6739  | 0.408 | 0.67266 | 0.63907 | 0.54922 | 0.80066 | 0.408 | 0.36337 | 0.75583 | 0.53702 | 0.76076 |
| 0.412 | 0.7734  | 0.7496  | 0.73483 | 0.412 | 0.73009 | 0.6841  | 0.58084 | 0.85018 | 0.412 | 0.39247 | 0.804   | 0.56701 | 0.80294 |
| 0.416 | 0.82966 | 0.80806 | 0.79419 | 0.416 | 0.78639 | 0.72601 | 0.61246 | 0.8962  | 0.416 | 0.42281 | 0.84974 | 0.59597 | 0.84355 |
| 0.42  | 0.88071 | 0.86222 | 0.8499  | 0.42  | 0.84015 | 0.76411 | 0.64237 | 0.93597 | 0.42  | 0.45396 | 0.89276 | 0.6224  | 0.88006 |
| 0.424 | 0.92447 | 0.91048 | 0.89984 | 0.424 | 0.88966 | 0.79633 | 0.67057 | 0.96773 | 0.424 | 0.48553 | 0.93093 | 0.64629 | 0.9128  |
| 0.428 | 0.96041 | 0.9503  | 0.94195 | 0.428 | 0.9321  | 0.82092 | 0.6945  | 0.98975 | 0.428 | 0.51586 | 0.96274 | 0.66611 | 0.9383  |
| 0.432 | 0.98489 | 0.97961 | 0.97359 | 0.432 | 0.96577 | 0.83685 | 0.71372 | 1       | 0.432 | 0.54456 | 0.98546 | 0.68135 | 0.9553  |
| 0.436 | 0.99844 | 0.9965  | 0.9932  | 0.436 | 0.9884  | 0.84309 | 0.7274  | 0.99775 | 0.436 | 0.57039 | 0.99788 | 0.68999 | 0.96317 |
| 0.44  | 1       | 1       | 1       | 0.44  | 1       | 0.83928 | 0.73338 | 0.98374 | 0.44  | 0.59211 | 1       | 0.69253 | 0.9616  |
| 0.444 | 0.9901  | 0.99012 | 0.99372 | 0.444 | 1       | 0.82646 | 0.73295 | 0.95848 | 0.444 | 0.60892 | 0.99152 | 0.68898 | 0.95058 |
| 0.448 | 0.97083 | 0.96751 | 0.9749  | 0.448 | 0.98755 | 0.80464 | 0.72569 | 0.92346 | 0.448 | 0.62122 | 0.97304 | 0.68034 | 0.93075 |
| 0.452 | 0.94166 | 0.93294 | 0.9443  | 0.452 | 0.96463 | 0.77589 | 0.71159 | 0.88069 | 0.452 | 0.62778 | 0.94547 | 0.66662 | 0.90336 |
| 0.456 | 0.90676 | 0.88946 | 0.9056  | 0.456 | 0.93295 | 0.74195 | 0.69279 | 0.83342 | 0.456 | 0.6286  | 0.91124 | 0.64934 | 0.87094 |
| 0.46  | 0.86769 | 0.83912 | 0.85983 | 0.46  | 0.89419 | 0.70419 | 0.66929 | 0.7839  | 0.46  | 0.62409 | 0.87186 | 0.63002 | 0.83442 |
| 0.464 | 0.82601 | 0.78433 | 0.80962 | 0.464 | 0.85005 | 0.66436 | 0.64237 | 0.73437 | 0.464 | 0.61507 | 0.82914 | 0.60919 | 0.79539 |
| 0.468 | 0.78434 | 0.72874 | 0.75785 | 0.468 | 0.80365 | 0.62314 | 0.61417 | 0.6866  | 0.468 | 0.60236 | 0.78491 | 0.58784 | 0.75667 |
| 0.472 | 0.74319 | 0.67299 | 0.70607 | 0.472 | 0.75555 | 0.58227 | 0.58469 | 0.64183 | 0.472 | 0.58637 | 0.73978 | 0.56752 | 0.71826 |
| 0.476 | 0.70412 | 0.61978 | 0.65586 | 0.476 | 0.70802 | 0.54243 | 0.55478 | 0.60106 | 0.476 | 0.56834 | 0.69615 | 0.5477  | 0.68143 |
| 0.48  | 0.66818 | 0.56993 | 0.60853 | 0.48  | 0.66162 | 0.50329 | 0.52529 | 0.56404 | 0.48  | 0.54907 | 0.65374 | 0.5294  | 0.64617 |
| 0.484 | 0.6338  | 0.52373 | 0.56433 | 0.484 | 0.6172  | 0.46692 | 0.49667 | 0.53128 | 0.484 | 0.52857 | 0.61315 | 0.51212 | 0.61375 |
| 0.488 | 0.60358 | 0.48216 | 0.52406 | 0.488 | 0.57561 | 0.43228 | 0.46975 | 0.50226 | 0.488 | 0.50808 | 0.57498 | 0.49687 | 0.58416 |
| 0.492 | 0.57545 | 0.44457 | 0.48771 | 0.492 | 0.53713 | 0.40007 | 0.44454 | 0.47675 | 0.492 | 0.48799 | 0.54044 | 0.48264 | 0.55677 |
| 0.496 | 0.55045 | 0.41112 | 0.45502 | 0.496 | 0.50177 | 0.37063 | 0.42061 | 0.45449 | 0.496 | 0.46831 | 0.50833 | 0.46943 | 0.53222 |
| 0.5   | 0.52753 | 0.38149 | 0.42573 | 0.5   | 0.46951 | 0.34361 | 0.39882 | 0.43523 | 0.5   | 0.44945 | 0.47895 | 0.45876 | 0.51018 |
| 0.504 | 0.50669 | 0.35537 | 0.39984 | 0.504 | 0.44037 | 0.31936 | 0.37959 | 0.41822 | 0.504 | 0.43183 | 0.45198 | 0.44859 | 0.49035 |
| 0.508 | 0.48794 | 0.33259 | 0.37735 | 0.508 | 0.41434 | 0.29754 | 0.36207 | 0.40347 | 0.508 | 0.41502 | 0.42866 | 0.43996 | 0.47335 |
| 0.512 | 0.47127 | 0.31252 | 0.35748 | 0.512 | 0.39114 | 0.27814 | 0.34627 | 0.39046 | 0.512 | 0.40026 | 0.40745 | 0.43233 | 0.45793 |
| 0.516 | 0.45564 | 0.29468 | 0.3397  | 0.516 | 0.37049 | 0.26082 | 0.33217 | 0.37896 | 0.516 | 0.38591 | 0.38867 | 0.42522 | 0.44439 |
| 0.52  | 0.4421  | 0.27955 | 0.32427 | 0.52  | 0.35238 | 0.24593 | 0.32063 | 0.3692  | 0.52  | 0.37362 | 0.37292 | 0.41912 | 0.43306 |
| 0.524 | 0.4296  | 0.26617 | 0.31119 | 0.524 | 0.33682 | 0.23277 | 0.31037 | 0.3607  | 0.524 | 0.36255 | 0.35898 | 0.41454 | 0.4233  |
| 0.528 | 0.41866 | 0.25438 | 0.29995 | 0.528 | 0.32324 | 0.22134 | 0.30183 | 0.35344 | 0.528 | 0.35271 | 0.34717 | 0.40997 | 0.41512 |
| 0.532 | 0.40824 | 0.24435 | 0.29027 | 0.532 | 0.31136 | 0.21164 | 0.29457 | 0.34694 | 0.532 | 0.3441  | 0.33717 | 0.40641 | 0.40819 |
| 0.536 | 0.39886 | 0.23543 | 0.2819  | 0.536 | 0.30146 | 0.20333 | 0.28901 | 0.34169 | 0.536 | 0.33672 | 0.32899 | 0.40336 | 0.40221 |
| 0.54  | 0.39001 | 0.22778 | 0.27484 | 0.54  | 0.29325 | 0.19605 | 0.28431 | 0.33744 | 0.54  | 0.33057 | 0.32293 | 0.40082 | 0.3978  |
| 0.544 | 0.3822  | 0.22077 | 0.26883 | 0.544 | 0.28618 | 0.19016 | 0.28089 | 0.33368 | 0.544 | 0.32565 | 0.31778 | 0.39879 | 0.39403 |
| 0.548 | 0.37438 | 0.21488 | 0.26386 | 0.548 | 0.27995 | 0.18531 | 0.27833 | 0.33043 | 0.548 | 0.32114 | 0.31354 | 0.39727 | 0.39056 |
| 0.552 | 0.36761 | 0.20962 | 0.25968 | 0.552 | 0.27514 | 0.18081 | 0.27705 | 0.32818 | 0.552 | 0.31827 | 0.31112 | 0.39574 | 0.38836 |
| 0.556 | 0.36136 | 0.205   | 0.25601 | 0.556 | 0.27147 | 0.17769 | 0.27619 | 0.32643 | 0.556 | 0.31582 | 0.3093  | 0.39472 | 0.38647 |
| 0.56  | 0.35459 | 0.20086 | 0.25314 | 0.56  | 0.26807 | 0.17492 | 0.27619 | 0.32518 | 0.56  | 0.31418 | 0.30809 | 0.39422 | 0.38521 |
| 0.564 | 0.34834 | 0.1972  | 0.25105 | 0.564 | 0.26553 | 0.1725  | 0.27662 | 0.32418 | 0.564 | 0.31295 | 0.30779 | 0.39371 | 0.38458 |
| 0.568 | 0.34208 | 0.19369 | 0.24895 | 0.568 | 0.26355 | 0.17077 | 0.2779  | 0.32393 | 0.568 | 0.31254 | 0.30839 | 0.3932  | 0.38364 |
| 0.572 | 0.33688 | 0.19098 | 0.24765 | 0.572 | 0.2627  | 0.16938 | 0.28004 | 0.32393 | 0.572 | 0.31295 | 0.30991 | 0.39269 | 0.38364 |
| 0.576 | 0.33115 | 0.18844 | 0.24634 | 0.576 | 0.26156 | 0.16834 | 0.28175 | 0.32418 | 0.576 | 0.31377 | 0.31112 | 0.39269 | 0.38395 |
| 0.58  | 0.32542 | 0.18573 | 0.24555 | 0.58  | 0.26072 | 0.16765 | 0.28431 | 0.32443 | 0.58  | 0.315   | 0.31233 | 0.39218 | 0.38364 |
| 0.584 | 0.31969 | 0.18366 | 0.24503 | 0.584 | 0.26072 | 0.16696 | 0.28687 | 0.32518 | 0.584 | 0.31664 | 0.31445 | 0.39218 | 0.38427 |
| 0.588 | 0.31448 | 0.18175 | 0.24477 | 0.588 | 0.26072 | 0.16661 | 0.28944 | 0.32593 | 0.588 | 0.31827 | 0.31657 | 0.39218 | 0.38458 |
| 0.592 | 0.30927 | 0.17999 | 0.24425 | 0.592 | 0.261   | 0.16661 | 0.292   | 0.32693 | 0.592 | 0.31991 | 0.31869 | 0.39218 | 0.38521 |
| 0.596 | 0.30458 | 0.17824 | 0.24399 | 0.596 | 0.261   | 0.16626 | 0.29499 | 0.32768 | 0.596 | 0.32196 | 0.32081 | 0.39218 | 0.38553 |
| 0.6   | 0.29937 | 0.17697 | 0.24399 | 0.6   | 0.26156 | 0.16626 | 0.29798 | 0.32868 | 0.6   | 0.32442 | 0.32293 | 0.39218 | 0.38616 |
| 0.604 | 0.29468 | 0.17585 | 0.24425 | 0.604 | 0.26241 | 0.16661 | 0.30097 | 0.32993 | 0.604 | 0.32647 | 0.32505 | 0.39218 | 0.38679 |
| 0.608 | 0.29051 | 0.17474 | 0.24451 | 0.608 | 0.26326 | 0.16661 | 0.30354 | 0.33093 | 0.608 | 0.32893 | 0.32717 | 0.39269 | 0.38741 |
| 0.612 | 0.28635 | 0.17378 | 0.24477 | 0.612 | 0.26383 | 0.16696 | 0.3061  | 0.33193 | 0.612 | 0.33057 | 0.32899 | 0.39218 | 0.38773 |
| 0.616 | 0.28218 | 0.17314 | 0.24555 | 0.616 | 0.26468 | 0.1673  | 0.30867 | 0.33293 | 0.616 | 0.33303 | 0.33081 | 0.39269 | 0.38836 |
| 0.62  | 0.27853 | 0.17251 | 0.24608 | 0.62  | 0.26581 | 0.16799 | 0.31166 | 0.33368 | 0.62  | 0.33508 | 0.33263 | 0.3932  | 0.38867 |
| 0.624 | 0.27483 | 0.17219 | 0.24686 | 0.624 | 0.26694 | 0.16834 |         |         |       |         |         |         |         |

|       |         |         |         |       |         |         |         |         |       |         |         |         |         |
|-------|---------|---------|---------|-------|---------|---------|---------|---------|-------|---------|---------|---------|---------|
| 0.736 | 0.25369 | 0.19513 | 0.29106 | 0.736 | 0.31079 | 0.21926 | 0.36336 | 0.34369 | 0.736 | 0.37403 | 0.36837 | 0.42318 | 0.40756 |
| 0.74  | 0.2554  | 0.19767 | 0.29446 | 0.74  | 0.31391 | 0.22445 | 0.36549 | 0.34469 | 0.74  | 0.37526 | 0.3711  | 0.42471 | 0.41008 |
| 0.744 | 0.2577  | 0.20054 | 0.29812 | 0.744 | 0.3173  | 0.23034 | 0.36848 | 0.34594 | 0.744 | 0.37731 | 0.37413 | 0.42623 | 0.41323 |
| 0.748 | 0.2602  | 0.20389 | 0.3023  | 0.748 | 0.32126 | 0.23692 | 0.37147 | 0.34719 | 0.748 | 0.37936 | 0.37807 | 0.42877 | 0.41669 |
| 0.752 | 0.26285 | 0.20707 | 0.30649 | 0.752 | 0.32522 | 0.24385 | 0.37447 | 0.34844 | 0.752 | 0.38141 | 0.38201 | 0.43081 | 0.42015 |
| 0.756 | 0.26567 | 0.21058 | 0.31093 | 0.756 | 0.32975 | 0.25078 | 0.37703 | 0.34994 | 0.756 | 0.38345 | 0.38625 | 0.43335 | 0.42362 |
| 0.76  | 0.26869 | 0.21424 | 0.31564 | 0.76  | 0.33428 | 0.25875 | 0.38045 | 0.35169 | 0.76  | 0.38591 | 0.39079 | 0.43589 | 0.42771 |
| 0.764 | 0.27218 | 0.21854 | 0.32087 | 0.764 | 0.33909 | 0.26671 | 0.38344 | 0.35344 | 0.764 | 0.38837 | 0.39624 | 0.43894 | 0.43243 |
| 0.768 | 0.27588 | 0.22284 | 0.3261  | 0.768 | 0.34418 | 0.27572 | 0.38686 | 0.35569 | 0.768 | 0.39124 | 0.402   | 0.44199 | 0.43684 |
| 0.772 | 0.27905 | 0.22714 | 0.33133 | 0.772 | 0.34927 | 0.28438 | 0.38985 | 0.35769 | 0.772 | 0.39411 | 0.40715 | 0.44504 | 0.44156 |
| 0.776 | 0.28374 | 0.2324  | 0.33787 | 0.776 | 0.35578 | 0.29442 | 0.39412 | 0.36045 | 0.776 | 0.39821 | 0.41381 | 0.4491  | 0.44754 |
| 0.78  | 0.28843 | 0.23718 | 0.34388 | 0.78  | 0.36172 | 0.30412 | 0.39754 | 0.3627  | 0.78  | 0.40108 | 0.42018 | 0.45266 | 0.45258 |
| 0.784 | 0.2926  | 0.24212 | 0.35016 | 0.784 | 0.36738 | 0.31347 | 0.40053 | 0.36545 | 0.784 | 0.40477 | 0.42593 | 0.45622 | 0.45824 |
| 0.788 | 0.29677 | 0.24721 | 0.35643 | 0.788 | 0.3736  | 0.32317 | 0.40352 | 0.3677  | 0.788 | 0.40846 | 0.43229 | 0.45978 | 0.46359 |
| 0.792 | 0.30093 | 0.25231 | 0.36271 | 0.792 | 0.37954 | 0.33287 | 0.40651 | 0.37045 | 0.792 | 0.41215 | 0.43865 | 0.46435 | 0.46926 |
| 0.796 | 0.30614 | 0.25757 | 0.36925 | 0.796 | 0.38577 | 0.34292 | 0.40993 | 0.3732  | 0.796 | 0.41625 | 0.44593 | 0.46841 | 0.47556 |
| 0.8   | 0.31083 | 0.26282 | 0.37578 | 0.8   | 0.39228 | 0.35296 | 0.41249 | 0.3762  | 0.8   | 0.42035 | 0.45259 | 0.47299 | 0.48154 |
| 0.804 | 0.31552 | 0.26792 | 0.38232 | 0.804 | 0.39822 | 0.36266 | 0.41506 | 0.37896 | 0.804 | 0.42445 | 0.45925 | 0.47705 | 0.48752 |
| 0.808 | 0.32021 | 0.27318 | 0.38886 | 0.808 | 0.40472 | 0.37236 | 0.41762 | 0.38196 | 0.808 | 0.42896 | 0.46622 | 0.48163 | 0.49381 |
| 0.812 | 0.32542 | 0.27843 | 0.3954  | 0.812 | 0.41123 | 0.38206 | 0.42061 | 0.38496 | 0.812 | 0.43347 | 0.47289 | 0.48671 | 0.50011 |
| 0.816 | 0.3301  | 0.28353 | 0.40167 | 0.816 | 0.41717 | 0.39141 | 0.42275 | 0.38796 | 0.816 | 0.43798 | 0.47985 | 0.49179 | 0.50609 |
| 0.82  | 0.33479 | 0.28831 | 0.40795 | 0.82  | 0.4234  | 0.40042 | 0.42488 | 0.39071 | 0.82  | 0.4429  | 0.48682 | 0.49637 | 0.51207 |
| 0.824 | 0.33948 | 0.29293 | 0.4137  | 0.824 | 0.42906 | 0.40873 | 0.42702 | 0.39346 | 0.824 | 0.447   | 0.49288 | 0.50145 | 0.51774 |
| 0.828 | 0.34417 | 0.29755 | 0.41998 | 0.828 | 0.43556 | 0.41773 | 0.42916 | 0.39646 | 0.828 | 0.4515  | 0.49985 | 0.50653 | 0.52403 |
| 0.832 | 0.34938 | 0.30248 | 0.42573 | 0.832 | 0.44122 | 0.42639 | 0.43129 | 0.39946 | 0.832 | 0.45642 | 0.50651 | 0.51212 | 0.53033 |
| 0.836 | 0.35354 | 0.30663 | 0.43149 | 0.836 | 0.44688 | 0.43401 | 0.433   | 0.40247 | 0.836 | 0.46134 | 0.51257 | 0.51771 | 0.53568 |
| 0.84  | 0.35875 | 0.31109 | 0.4375  | 0.84  | 0.45282 | 0.44198 | 0.43514 | 0.40547 | 0.84  | 0.46585 | 0.51924 | 0.5233  | 0.54198 |
| 0.844 | 0.36292 | 0.31555 | 0.44299 | 0.844 | 0.45876 | 0.4496  | 0.43728 | 0.40847 | 0.844 | 0.47118 | 0.5253  | 0.52889 | 0.54796 |
| 0.848 | 0.36813 | 0.31969 | 0.44848 | 0.848 | 0.46414 | 0.45688 | 0.43941 | 0.41147 | 0.848 | 0.4761  | 0.53135 | 0.53448 | 0.55362 |
| 0.852 | 0.3723  | 0.32351 | 0.45371 | 0.852 | 0.46951 | 0.46415 | 0.44155 | 0.41447 | 0.852 | 0.48102 | 0.53711 | 0.54007 | 0.55929 |
| 0.856 | 0.37699 | 0.32733 | 0.45894 | 0.856 | 0.47517 | 0.47038 | 0.44368 | 0.41722 | 0.856 | 0.48594 | 0.54287 | 0.54617 | 0.56464 |
| 0.86  | 0.38167 | 0.33163 | 0.46417 | 0.86  | 0.48083 | 0.47697 | 0.44582 | 0.42022 | 0.86  | 0.49086 | 0.54862 | 0.55227 | 0.57031 |
| 0.864 | 0.38584 | 0.3353  | 0.4694  | 0.864 | 0.48621 | 0.4832  | 0.44796 | 0.42323 | 0.864 | 0.49619 | 0.55438 | 0.55837 | 0.57598 |
| 0.868 | 0.39001 | 0.3388  | 0.47437 | 0.868 | 0.4913  | 0.48874 | 0.45009 | 0.42598 | 0.868 | 0.50152 | 0.55953 | 0.56447 | 0.58101 |
| 0.872 | 0.39418 | 0.34231 | 0.47908 | 0.872 | 0.49668 | 0.49428 | 0.45266 | 0.42898 | 0.872 | 0.50685 | 0.56498 | 0.57056 | 0.58636 |
| 0.876 | 0.39886 | 0.34629 | 0.48457 | 0.876 | 0.50262 | 0.49983 | 0.45522 | 0.43223 | 0.876 | 0.51259 | 0.57074 | 0.57768 | 0.59171 |
| 0.88  | 0.40303 | 0.34979 | 0.48954 | 0.88  | 0.50799 | 0.50468 | 0.45778 | 0.43523 | 0.88  | 0.51832 | 0.57589 | 0.58378 | 0.59707 |
| 0.884 | 0.40668 | 0.35314 | 0.49425 | 0.884 | 0.5128  | 0.50918 | 0.46035 | 0.43798 | 0.884 | 0.52324 | 0.58134 | 0.58988 | 0.6021  |
| 0.888 | 0.41085 | 0.35648 | 0.49922 | 0.888 | 0.51818 | 0.51368 | 0.46291 | 0.44073 | 0.888 | 0.52898 | 0.58619 | 0.59648 | 0.60714 |
| 0.892 | 0.41501 | 0.35999 | 0.50418 | 0.892 | 0.52355 | 0.51818 | 0.46633 | 0.44399 | 0.892 | 0.53513 | 0.59164 | 0.60258 | 0.61249 |
| 0.896 | 0.41918 | 0.36365 | 0.50941 | 0.896 | 0.52921 | 0.52269 | 0.46932 | 0.44699 | 0.896 | 0.54087 | 0.59739 | 0.60868 | 0.61784 |
| 0.9   | 0.42283 | 0.367   | 0.51438 | 0.9   | 0.5343  | 0.5265  | 0.47274 | 0.44974 | 0.9   | 0.54661 | 0.60254 | 0.61478 | 0.62256 |
| 0.904 | 0.42699 | 0.37082 | 0.51961 | 0.904 | 0.53996 | 0.531   | 0.47659 | 0.45274 | 0.904 | 0.55276 | 0.6083  | 0.62088 | 0.6276  |
| 0.908 | 0.43064 | 0.37448 | 0.5251  | 0.908 | 0.54562 | 0.5355  | 0.48043 | 0.45599 | 0.908 | 0.5585  | 0.61406 | 0.62698 | 0.63295 |
| 0.912 | 0.43429 | 0.37815 | 0.53033 | 0.912 | 0.55128 | 0.54035 | 0.4847  | 0.45924 | 0.912 | 0.56506 | 0.61951 | 0.63307 | 0.63799 |
| 0.916 | 0.43793 | 0.38213 | 0.53609 | 0.916 | 0.55694 | 0.5452  | 0.48898 | 0.46224 | 0.916 | 0.57121 | 0.62496 | 0.63866 | 0.64334 |
| 0.92  | 0.44158 | 0.38611 | 0.54158 | 0.92  | 0.56288 | 0.55074 | 0.49368 | 0.4655  | 0.92  | 0.57736 | 0.63102 | 0.64476 | 0.64869 |
| 0.924 | 0.44575 | 0.39041 | 0.54759 | 0.924 | 0.5691  | 0.55663 | 0.4988  | 0.46875 | 0.924 | 0.58391 | 0.63708 | 0.65086 | 0.65467 |
| 0.928 | 0.44939 | 0.39471 | 0.55387 | 0.928 | 0.57561 | 0.56287 | 0.50479 | 0.47225 | 0.928 | 0.59047 | 0.64344 | 0.65594 | 0.66034 |
| 0.932 | 0.45304 | 0.39901 | 0.56015 | 0.932 | 0.58212 | 0.5691  | 0.50991 | 0.47575 | 0.932 | 0.59662 | 0.6495  | 0.66153 | 0.66601 |
| 0.936 | 0.45721 | 0.40395 | 0.56695 | 0.936 | 0.58863 | 0.57707 | 0.51675 | 0.4795  | 0.936 | 0.60359 | 0.65647 | 0.66763 | 0.6723  |
| 0.94  | 0.46137 | 0.40905 | 0.57401 | 0.94  | 0.59598 | 0.58504 | 0.52359 | 0.4835  | 0.94  | 0.61015 | 0.66344 | 0.67322 | 0.67891 |
| 0.944 | 0.46554 | 0.41462 | 0.58133 | 0.944 | 0.60362 | 0.59404 | 0.53085 | 0.48751 | 0.944 | 0.61712 | 0.67071 | 0.67881 | 0.68584 |
| 0.948 | 0.47023 | 0.42004 | 0.58865 | 0.948 | 0.61126 | 0.60339 | 0.53811 | 0.49151 | 0.948 | 0.62409 | 0.67798 | 0.6844  | 0.69276 |
| 0.952 | 0.47492 | 0.42577 | 0.5965  | 0.952 | 0.61918 | 0.61379 | 0.54623 | 0.49601 | 0.952 | 0.63106 | 0.68585 | 0.68999 | 0.7     |
| 0.956 | 0.48013 | 0.43198 | 0.60486 | 0.956 | 0.62767 | 0.62452 | 0.55478 | 0.50051 | 0.956 | 0.63844 | 0.69403 | 0.69609 | 0.70819 |
| 0.96  | 0.48534 | 0.43836 | 0.61349 | 0.96  | 0.63616 | 0.6363  | 0.56332 | 0.50527 | 0.96  | 0.64581 | 0.70251 | 0.70219 | 0.71637 |
| 0.964 | 0.49002 | 0.44473 | 0.62186 | 0.964 | 0.64493 | 0.64773 | 0.5723  | 0.51027 | 0.964 | 0.65319 | 0.71069 | 0.70778 | 0.72456 |
| 0.968 | 0.49628 | 0.45142 | 0.63075 | 0.968 | 0.65427 | 0.6602  | 0.5817  | 0.51552 | 0.968 | 0.66098 | 0.71948 | 0.71439 | 0.73369 |
| 0.972 | 0.50201 | 0.45827 | 0.63991 | 0.972 | 0.66388 | 0.67302 | 0.59152 | 0.52102 | 0.972 | 0.66836 | 0.72857 | 0.72099 | 0.74313 |
| 0.976 | 0.50826 | 0.46496 | 0.64906 | 0.976 | 0.6735  | 0.68549 | 0.60092 | 0.52653 | 0.976 | 0.67656 | 0.73705 | 0.72658 | 0.75289 |
| 0.98  | 0.51451 | 0.47165 | 0.65847 | 0.98  | 0.68284 | 0.69865 | 0.61032 | 0.53203 | 0.98  | 0.68435 | 0.74553 | 0.7337  | 0.76233 |
| 0.984 | 0.52128 | 0.47834 | 0.66736 | 0.984 | 0.69218 | 0.71112 | 0.61972 | 0.53778 | 0.984 | 0.69214 | 0.75401 | 0.7398  | 0.77209 |
| 0.988 | 0.52753 | 0.48487 | 0.67652 | 0.988 | 0.70151 | 0.72324 | 0.6287  | 0.54303 | 0.988 | 0.70034 | 0.7625  | 0.74691 | 0.78185 |
| 0.992 | 0.53482 | 0.49124 | 0.68567 | 0.992 | 0.71085 | 0.73502 | 0.6381  | 0.54854 | 0.992 | 0.70853 | 0.77098 | 0.75352 | 0.79161 |
| 0.996 | 0.54107 | 0.49697 | 0.69378 | 0.996 | 0.71934 | 0.74576 | 0.64579 | 0.55379 | 0.996 | 0.71591 | 0.77764 | 0.76013 | 0.80074 |
| 1     | 0.54837 | 0.50255 | 0.70214 | 1     | 0.72754 | 0.75649 | 0.65348 | 0.55854 | 1     | 0.72411 | 0.78491 | 0.76673 | 0.81018 |
| 1.004 | 0.55514 | 0.50781 | 0.70973 | 1.004 | 0.73546 | 0.76654 | 0.66117 | 0.56329 | 1.004 | 0.73149 | 0.79188 | 0.77334 | 0.81868 |
| 1.008 | 0.56139 | 0.51242 | 0.71679 | 1.008 | 0.74282 | 0.7752  | 0.66715 | 0.56754 | 1.008 | 0.73887 | 0.79703 | 0.77944 | 0.82686 |
| 1.012 | 0.56764 | 0.51641 | 0.72306 | 1.012 | 0.74905 | 0.78247 | 0.67313 | 0.57105 | 1.012 | 0.74584 | 0.80158 | 0.78554 | 0.83442 |
| 1.016 | 0.57337 | 0.51991 | 0.72882 | 1.016 | 0.7547  | 0.78871 | 0.67783 | 0.57455 | 1.016 | 0.7524  | 0.80521 | 0.79113 | 0.84103 |
| 1.02  | 0.5791  | 0.52278 | 0.73405 | 1.02  | 0.76008 | 0.7946  | 0.68211 | 0.57705 | 1.02  | 0.75896 | 0.80824 | 0.79672 | 0.84701 |
| 1.024 | 0.58483 | 0.52533 | 0.73823 | 1.024 | 0.76461 | 0.79875 | 0.68552 | 0.5793  | 1.024 | 0.7647  | 0.81036 | 0.8018  | 0.85236 |
| 1.028 | 0.589   | 0.5266  | 0.74137 | 1.028 | 0.76744 | 0.80118 | 0.68766 | 0.58055 | 1.028 | 0.76962 | 0.81097 | 0.80586 | 0.85614 |
| 1.032 | 0.59369 | 0.52788 | 0.74477 | 1.032 | 0.77026 | 0.80326 | 0.6898  | 0.5813  | 1.032 | 0.77412 | 0.81127 | 0.80993 | 0.8596  |
| 1.036 | 0.59733 | 0.52835 | 0.74712 | 1.036 |         |         |         |         |       |         |         |         |         |

|       |         |         |         |       |         |         |         |         |       |         |         |         |         |
|-------|---------|---------|---------|-------|---------|---------|---------|---------|-------|---------|---------|---------|---------|
| 1.148 | 0.60358 | 0.48009 | 0.7147  | 1.148 | 0.7117  | 0.75442 | 0.67014 | 0.51177 | 1.148 | 0.74994 | 0.71706 | 0.79163 | 0.80325 |
| 1.152 | 0.60515 | 0.48009 | 0.71574 | 1.152 | 0.71226 | 0.75546 | 0.67313 | 0.51152 | 1.152 | 0.74994 | 0.71645 | 0.79163 | 0.80388 |
| 1.156 | 0.60619 | 0.48009 | 0.71627 | 1.156 | 0.71311 | 0.75719 | 0.67612 | 0.51102 | 1.156 | 0.74994 | 0.71615 | 0.79113 | 0.80451 |
| 1.16  | 0.60827 | 0.48073 | 0.71783 | 1.16  | 0.71425 | 0.75892 | 0.67954 | 0.51102 | 1.16  | 0.75035 | 0.71645 | 0.79163 | 0.80577 |
| 1.164 | 0.61036 | 0.48152 | 0.7194  | 1.164 | 0.71594 | 0.76169 | 0.68381 | 0.51127 | 1.164 | 0.75117 | 0.71706 | 0.79214 | 0.80735 |
| 1.168 | 0.61244 | 0.48264 | 0.72097 | 1.168 | 0.71764 | 0.76446 | 0.68809 | 0.51152 | 1.168 | 0.7524  | 0.71796 | 0.79316 | 0.80924 |
| 1.172 | 0.61504 | 0.48359 | 0.72306 | 1.172 | 0.7199  | 0.76758 | 0.69236 | 0.51227 | 1.172 | 0.75363 | 0.71918 | 0.79418 | 0.81112 |
| 1.176 | 0.61817 | 0.48519 | 0.72542 | 1.176 | 0.72217 | 0.7707  | 0.69706 | 0.51302 | 1.176 | 0.75568 | 0.72008 | 0.7957  | 0.81396 |
| 1.18  | 0.62182 | 0.48694 | 0.72777 | 1.18  | 0.72556 | 0.77416 | 0.70261 | 0.51377 | 1.18  | 0.75814 | 0.72221 | 0.79773 | 0.81679 |
| 1.184 | 0.62598 | 0.48917 | 0.73143 | 1.184 | 0.72952 | 0.7797  | 0.70902 | 0.51552 | 1.184 | 0.76183 | 0.72493 | 0.80078 | 0.82088 |
| 1.188 | 0.62963 | 0.49092 | 0.73431 | 1.188 | 0.73292 | 0.78317 | 0.71458 | 0.51677 | 1.188 | 0.76429 | 0.72645 | 0.80332 | 0.82435 |
| 1.192 | 0.6338  | 0.49347 | 0.73745 | 1.192 | 0.73688 | 0.78802 | 0.72099 | 0.51827 | 1.192 | 0.76798 | 0.72887 | 0.80586 | 0.82812 |
| 1.196 | 0.63796 | 0.4957  | 0.74111 | 1.196 | 0.74084 | 0.79286 | 0.7274  | 0.52002 | 1.196 | 0.77167 | 0.7316  | 0.80942 | 0.83253 |
| 1.2   | 0.64265 | 0.49841 | 0.74451 | 1.2   | 0.74565 | 0.79806 | 0.73423 | 0.52177 | 1.2   | 0.77617 | 0.73402 | 0.81298 | 0.83662 |
| 1.204 | 0.64682 | 0.50112 | 0.74817 | 1.204 | 0.75018 | 0.80326 | 0.7415  | 0.52377 | 1.204 | 0.78027 | 0.73675 | 0.81654 | 0.84103 |
| 1.208 | 0.65203 | 0.50382 | 0.75235 | 1.208 | 0.75527 | 0.80845 | 0.74833 | 0.52602 | 1.208 | 0.78519 | 0.74008 | 0.8206  | 0.84544 |
| 1.212 | 0.65724 | 0.50717 | 0.75654 | 1.212 | 0.76065 | 0.81434 | 0.75645 | 0.52828 | 1.212 | 0.79093 | 0.74371 | 0.82518 | 0.85079 |
| 1.216 | 0.66297 | 0.51051 | 0.76098 | 1.216 | 0.76602 | 0.82057 | 0.76414 | 0.53078 | 1.216 | 0.79667 | 0.74705 | 0.82975 | 0.85583 |
| 1.22  | 0.66818 | 0.5137  | 0.76569 | 1.22  | 0.77168 | 0.82612 | 0.77183 | 0.53328 | 1.22  | 0.802   | 0.75038 | 0.83432 | 0.86055 |
| 1.224 | 0.67443 | 0.51752 | 0.77066 | 1.224 | 0.77762 | 0.83304 | 0.78038 | 0.53578 | 1.224 | 0.80856 | 0.75401 | 0.83991 | 0.8659  |
| 1.228 | 0.68068 | 0.52134 | 0.77589 | 1.228 | 0.78384 | 0.83963 | 0.78892 | 0.53878 | 1.228 | 0.81512 | 0.75795 | 0.8455  | 0.87156 |
| 1.232 | 0.68693 | 0.52533 | 0.78086 | 1.232 | 0.79035 | 0.84621 | 0.79747 | 0.54178 | 1.232 | 0.82168 | 0.76189 | 0.8516  | 0.87692 |
| 1.236 | 0.69318 | 0.52931 | 0.78609 | 1.236 | 0.79686 | 0.85244 | 0.80602 | 0.54453 | 1.236 | 0.82865 | 0.76553 | 0.8577  | 0.88195 |
| 1.24  | 0.69943 | 0.53377 | 0.79184 | 1.24  | 0.80393 | 0.86006 | 0.81542 | 0.54754 | 1.24  | 0.83562 | 0.76946 | 0.8638  | 0.88793 |
| 1.244 | 0.70673 | 0.53839 | 0.79759 | 1.244 | 0.81157 | 0.86768 | 0.82524 | 0.55079 | 1.244 | 0.84381 | 0.77401 | 0.87092 | 0.8936  |
| 1.248 | 0.71402 | 0.54349 | 0.80387 | 1.248 | 0.81978 | 0.87565 | 0.8355  | 0.55404 | 1.248 | 0.85242 | 0.77916 | 0.87854 | 0.8999  |
| 1.252 | 0.72131 | 0.54795 | 0.81015 | 1.252 | 0.8277  | 0.88327 | 0.84575 | 0.55729 | 1.252 | 0.86103 | 0.7834  | 0.88515 | 0.90588 |
| 1.256 | 0.72965 | 0.55336 | 0.81695 | 1.256 | 0.83619 | 0.89193 | 0.85686 | 0.56079 | 1.256 | 0.87005 | 0.78855 | 0.89328 | 0.91249 |
| 1.26  | 0.73798 | 0.55878 | 0.82401 | 1.26  | 0.84524 | 0.90024 | 0.86797 | 0.56454 | 1.26  | 0.87948 | 0.794   | 0.90141 | 0.9191  |
| 1.264 | 0.74631 | 0.56435 | 0.83081 | 1.264 | 0.85429 | 0.9089  | 0.87951 | 0.56855 | 1.264 | 0.88973 | 0.79945 | 0.91005 | 0.92602 |
| 1.268 | 0.75465 | 0.57009 | 0.83787 | 1.268 | 0.86363 | 0.91756 | 0.89104 | 0.5723  | 1.268 | 0.89957 | 0.8046  | 0.91818 | 0.93326 |
| 1.272 | 0.7635  | 0.57614 | 0.84545 | 1.272 | 0.87353 | 0.92691 | 0.90344 | 0.5763  | 1.272 | 0.91063 | 0.81006 | 0.92733 | 0.94082 |
| 1.276 | 0.77288 | 0.58235 | 0.85356 | 1.276 | 0.884   | 0.93661 | 0.91625 | 0.58055 | 1.276 | 0.92211 | 0.81581 | 0.93647 | 0.94837 |
| 1.28  | 0.7833  | 0.58888 | 0.86192 | 1.28  | 0.89475 | 0.94666 | 0.92864 | 0.58505 | 1.28  | 0.934   | 0.82218 | 0.94613 | 0.95656 |
| 1.284 | 0.7932  | 0.59541 | 0.86977 | 1.284 | 0.90522 | 0.95636 | 0.94189 | 0.58956 | 1.284 | 0.94589 | 0.82823 | 0.95579 | 0.96443 |
| 1.288 | 0.80362 | 0.60274 | 0.87918 | 1.288 | 0.91739 | 0.96744 | 0.95642 | 0.59456 | 1.288 | 0.95901 | 0.8355  | 0.96697 | 0.97324 |
| 1.292 | 0.81403 | 0.61007 | 0.88781 | 1.292 | 0.92899 | 0.97783 | 0.97052 | 0.59931 | 1.292 | 0.97253 | 0.84247 | 0.97764 | 0.98206 |
| 1.296 | 0.82549 | 0.61708 | 0.89697 | 1.296 | 0.94115 | 0.98892 | 0.98505 | 0.60431 | 1.296 | 0.98606 | 0.84944 | 0.98882 | 0.99087 |
| 1.3   | 0.83643 | 0.62456 | 0.90612 | 1.3   | 0.95332 | 1       | 1       | 0.60931 | 1.3   | 1       | 0.85671 | 1       | 1       |

Water-PBS (Spring)

|       |          |          |          |
|-------|----------|----------|----------|
| 0.004 | 0.03729  | 0.04268  | 0.02129  |
| 0.008 | 0.03379  | 0.03926  | 0.01858  |
| 0.012 | 0.03091  | 0.03602  | 0.01624  |
| 0.016 | 0.02796  | 0.03312  | 0.01424  |
| 0.02  | 0.02565  | 0.03022  | 0.01228  |
| 0.024 | 0.02319  | 0.02783  | 0.01047  |
| 0.028 | 0.02126  | 0.02561  | 0.009    |
| 0.032 | 0.01923  | 0.02322  | 0.00771  |
| 0.036 | 0.01723  | 0.02134  | 0.00645  |
| 0.04  | 0.01551  | 0.01946  | 0.00523  |
| 0.044 | 0.01382  | 0.01758  | 0.00433  |
| 0.048 | 0.01207  | 0.01571  | 0.00346  |
| 0.052 | 0.01049  | 0.014    | 0.00274  |
| 0.056 | 0.00895  | 0.01229  | 0.00216  |
| 0.06  | 0.00761  | 0.01093  | 0.00156  |
| 0.064 | 0.00624  | 0.00922  | 9.08E-04 |
| 0.068 | 0.00477  | 0.00768  | 4.83E-04 |
| 0.072 | 0.00368  | 0.00615  | 3.09E-04 |
| 0.076 | 0.00267  | 0.00512  | 0        |
| 0.08  | 0.00175  | 0.00376  | 3.86E-05 |
| 0.084 | 0.00109  | 0.00273  | 1.55E-04 |
| 0.088 | 5.26E-04 | 0.00188  | 2.51E-04 |
| 0.092 | 2.11E-04 | 0.00119  | 8.89E-04 |
| 0.096 | 0        | 5.12E-04 | 0.00178  |
| 0.1   | 2.46E-04 | 1.71E-04 | 0.00276  |
| 0.104 | 7.37E-04 | 0        | 0.00454  |
| 0.108 | 0.00158  | 1.71E-04 | 0.00653  |
| 0.112 | 0.00298  | 6.83E-04 | 0.00904  |
| 0.116 | 0.00484  | 0.00154  | 0.01199  |
| 0.12  | 0.00754  | 0.00273  | 0.01563  |
| 0.124 | 0.01077  | 0.00444  | 0.02013  |
| 0.128 | 0.01516  | 0.007    | 0.02534  |
| 0.132 | 0.02014  | 0.01007  | 0.03114  |
| 0.136 | 0.02631  | 0.014    | 0.03809  |
| 0.14  | 0.03421  | 0.01861  | 0.04601  |
| 0.144 | 0.04326  | 0.02424  | 0.05489  |
| 0.148 | 0.05396  | 0.03107  | 0.06513  |
| 0.152 | 0.06666  | 0.03892  | 0.07633  |
| 0.156 | 0.08182  | 0.04814  | 0.0887   |
| 0.16  | 0.09999  | 0.05872  | 0.1026   |
| 0.164 | 0.12055  | 0.07067  | 0.11728  |
| 0.168 | 0.14535  | 0.0845   | 0.1337   |
| 0.172 | 0.17377  | 0.09969  | 0.15128  |
| 0.176 | 0.20745  | 0.11676  | 0.17021  |
| 0.18  | 0.24604  | 0.13588  | 0.19068  |
| 0.184 | 0.2906   | 0.15739  | 0.21309  |
| 0.188 | 0.34112  | 0.18197  | 0.23762  |
| 0.192 | 0.39691  | 0.20912  | 0.26427  |
| 0.196 | 0.4583   | 0.23916  | 0.29344  |
| 0.2   | 0.52461  | 0.27313  | 0.32608  |
| 0.204 | 0.59373  | 0.31052  | 0.36182  |
| 0.208 | 0.66425  | 0.35183  | 0.40103  |
| 0.212 | 0.73371  | 0.39672  | 0.44371  |
| 0.216 | 0.80002  | 0.44537  | 0.48969  |
| 0.22  | 0.86001  | 0.49727  | 0.53875  |
| 0.224 | 0.91229  | 0.55189  | 0.59032  |
| 0.228 | 0.95404  | 0.6084   | 0.64266  |
| 0.232 | 0.98351  | 0.66559  | 0.69559  |
| 0.236 | 0.99895  | 0.72277  | 0.74639  |
| 0.24  | 1        | 0.77808  | 0.79448  |
| 0.244 | 0.98632  | 0.82998  | 0.83736  |
| 0.248 | 0.9586   | 0.8776   | 0.87426  |



|       |         |         |         |       |         |         |         |         |       |         |         |         |         |
|-------|---------|---------|---------|-------|---------|---------|---------|---------|-------|---------|---------|---------|---------|
| 0.252 | 0.92001 | 0.9196  | 0.90304 | 0.252 | 0.87628 | 0.33149 | 0.42061 | 0.99864 | 0.252 | 0.98981 | 0.62913 | 0.95237 | 0.99043 |
| 0.256 | 0.87159 | 0.95408 | 0.92255 | 0.256 | 0.90969 | 0.34277 | 0.42839 | 1       | 0.256 | 0.98058 | 0.62723 | 0.9318  | 0.9746  |
| 0.26  | 0.81686 | 0.97934 | 0.93143 | 0.26  | 0.93468 | 0.35083 | 0.43446 | 0.98943 | 0.26  | 0.9602  | 0.61933 | 0.90509 | 0.95179 |
| 0.264 | 0.75932 | 0.99522 | 0.92969 | 0.264 | 0.95274 | 0.35513 | 0.43977 | 0.96775 | 0.264 | 0.93027 | 0.60575 | 0.87406 | 0.92418 |
| 0.268 | 0.70073 | 1       | 0.91617 | 0.268 | 0.96147 | 0.35567 | 0.44204 | 0.93496 | 0.268 | 0.89111 | 0.58743 | 0.83869 | 0.89179 |
| 0.272 | 0.64214 | 0.993   | 0.89183 | 0.272 | 0.96117 | 0.35245 | 0.44204 | 0.89295 | 0.272 | 0.84589 | 0.56468 | 0.8008  | 0.85536 |
| 0.276 | 0.58531 | 0.97474 | 0.85745 | 0.276 | 0.95093 | 0.34573 | 0.43939 | 0.84363 | 0.276 | 0.79591 | 0.53878 | 0.76183 | 0.81708 |
| 0.28  | 0.53058 | 0.9452  | 0.81476 | 0.28  | 0.93257 | 0.33552 | 0.43427 | 0.7897  | 0.28  | 0.74432 | 0.51129 | 0.72285 | 0.77806 |
| 0.284 | 0.479   | 0.90679 | 0.76609 | 0.284 | 0.90638 | 0.32316 | 0.42649 | 0.7336  | 0.284 | 0.69306 | 0.48286 | 0.68424 | 0.73868 |
| 0.288 | 0.42988 | 0.86019 | 0.71336 | 0.288 | 0.87357 | 0.30865 | 0.41606 | 0.6775  | 0.288 | 0.64275 | 0.45443 | 0.64743 | 0.70077 |
| 0.292 | 0.38463 | 0.80813 | 0.6587  | 0.292 | 0.83564 | 0.29226 | 0.40316 | 0.62275 | 0.292 | 0.59468 | 0.42631 | 0.61207 | 0.6636  |
| 0.296 | 0.34288 | 0.75316 | 0.605   | 0.296 | 0.79379 | 0.2756  | 0.38875 | 0.57153 | 0.296 | 0.54978 | 0.39946 | 0.57887 | 0.629   |
| 0.3   | 0.30463 | 0.69785 | 0.55304 | 0.3   | 0.75014 | 0.2584  | 0.37263 | 0.52438 | 0.3   | 0.50839 | 0.37419 | 0.54819 | 0.59625 |
| 0.304 | 0.2699  | 0.64322 | 0.50398 | 0.304 | 0.70529 | 0.24094 | 0.3548  | 0.48156 | 0.304 | 0.4705  | 0.35018 | 0.51969 | 0.5657  |
| 0.308 | 0.23868 | 0.59167 | 0.45859 | 0.308 | 0.66104 | 0.22374 | 0.33641 | 0.4428  | 0.308 | 0.43579 | 0.32744 | 0.4937  | 0.53736 |
| 0.312 | 0.21096 | 0.54336 | 0.41667 | 0.312 | 0.61769 | 0.20708 | 0.31725 | 0.40839 | 0.312 | 0.40459 | 0.30659 | 0.46952 | 0.51086 |
| 0.316 | 0.18675 | 0.49966 | 0.37901 | 0.316 | 0.57705 | 0.19096 | 0.29848 | 0.3783  | 0.316 | 0.37625 | 0.28732 | 0.44787 | 0.4873  |
| 0.32  | 0.165   | 0.45971 | 0.34482 | 0.32  | 0.53852 | 0.17565 | 0.27932 | 0.35147 | 0.32  | 0.3511  | 0.26994 | 0.42802 | 0.46559 |
| 0.324 | 0.1457  | 0.42352 | 0.31391 | 0.324 | 0.50269 | 0.16114 | 0.26073 | 0.32762 | 0.324 | 0.32818 | 0.25351 | 0.40998 | 0.44534 |
| 0.328 | 0.12921 | 0.39075 | 0.28649 | 0.328 | 0.46928 | 0.1477  | 0.24329 | 0.30649 | 0.328 | 0.30748 | 0.23867 | 0.39374 | 0.42768 |
| 0.332 | 0.11458 | 0.36173 | 0.26196 | 0.332 | 0.43857 | 0.13507 | 0.22603 | 0.28779 | 0.332 | 0.28965 | 0.22571 | 0.37931 | 0.41112 |
| 0.336 | 0.10178 | 0.3351  | 0.23974 | 0.336 | 0.41028 | 0.12325 | 0.2101  | 0.27098 | 0.336 | 0.27341 | 0.21371 | 0.36559 | 0.39639 |
| 0.34  | 0.09066 | 0.3112  | 0.22004 | 0.34  | 0.38409 | 0.1125  | 0.1953  | 0.25608 | 0.34  | 0.2594  | 0.20329 | 0.35369 | 0.38351 |
| 0.344 | 0.0808  | 0.28952 | 0.20227 | 0.344 | 0.36031 | 0.10256 | 0.18127 | 0.2428  | 0.344 | 0.24698 | 0.19349 | 0.34286 | 0.371   |
| 0.348 | 0.07238 | 0.2704  | 0.18643 | 0.348 | 0.33863 | 0.09396 | 0.16856 | 0.23114 | 0.348 | 0.23584 | 0.18496 | 0.33312 | 0.36032 |
| 0.352 | 0.06491 | 0.25265 | 0.17214 | 0.352 | 0.31846 | 0.08563 | 0.15699 | 0.22085 | 0.352 | 0.22629 | 0.17738 | 0.32446 | 0.35075 |
| 0.356 | 0.05838 | 0.2366  | 0.15958 | 0.356 | 0.3001  | 0.07811 | 0.14656 | 0.21136 | 0.356 | 0.21769 | 0.17075 | 0.31652 | 0.34229 |
| 0.36  | 0.05301 | 0.22209 | 0.14857 | 0.36  | 0.28384 | 0.07166 | 0.1367  | 0.20296 | 0.36  | 0.21069 | 0.16506 | 0.30966 | 0.33493 |
| 0.364 | 0.04835 | 0.20946 | 0.13892 | 0.364 | 0.26879 | 0.06602 | 0.12855 | 0.19586 | 0.364 | 0.20464 | 0.16032 | 0.30389 | 0.32867 |
| 0.368 | 0.04431 | 0.19751 | 0.13042 | 0.368 | 0.25494 | 0.06091 | 0.12077 | 0.18935 | 0.368 | 0.19954 | 0.1558  | 0.29847 | 0.32278 |
| 0.372 | 0.04045 | 0.18658 | 0.12288 | 0.372 | 0.2426  | 0.05635 | 0.11356 | 0.18377 | 0.372 | 0.19508 | 0.15201 | 0.29342 | 0.31763 |
| 0.376 | 0.03743 | 0.17685 | 0.11632 | 0.376 | 0.23086 | 0.05258 | 0.1075  | 0.17865 | 0.376 | 0.19158 | 0.14873 | 0.28909 | 0.31358 |
| 0.38  | 0.03498 | 0.16815 | 0.11072 | 0.38  | 0.22063 | 0.04936 | 0.10237 | 0.17431 | 0.38  | 0.18872 | 0.14617 | 0.28548 | 0.3099  |
| 0.384 | 0.0328  | 0.16012 | 0.10589 | 0.384 | 0.21129 | 0.04638 | 0.09763 | 0.17068 | 0.384 | 0.18681 | 0.14405 | 0.28223 | 0.30696 |
| 0.388 | 0.03073 | 0.15278 | 0.10164 | 0.388 | 0.20287 | 0.0439  | 0.09327 | 0.16735 | 0.388 | 0.1849  | 0.14225 | 0.27935 | 0.30438 |
| 0.392 | 0.02926 | 0.1463  | 0.09816 | 0.392 | 0.19564 | 0.04202 | 0.08967 | 0.16461 | 0.392 | 0.18394 | 0.14083 | 0.27718 | 0.30254 |
| 0.396 | 0.02789 | 0.14066 | 0.09526 | 0.396 | 0.18902 | 0.04041 | 0.08682 | 0.16231 | 0.396 | 0.1833  | 0.13979 | 0.27502 | 0.30107 |
| 0.4   | 0.02687 | 0.13571 | 0.09314 | 0.4   | 0.183   | 0.03936 | 0.08379 | 0.16065 | 0.4   | 0.18298 | 0.13912 | 0.27357 | 0.29996 |
| 0.404 | 0.0261  | 0.13093 | 0.0914  | 0.404 | 0.17788 | 0.03834 | 0.0817  | 0.15908 | 0.404 | 0.18298 | 0.13852 | 0.27213 | 0.29886 |
| 0.408 | 0.02551 | 0.12701 | 0.09024 | 0.408 | 0.17367 | 0.03754 | 0.08    | 0.15789 | 0.408 | 0.1833  | 0.13837 | 0.27141 | 0.29849 |
| 0.412 | 0.02505 | 0.12325 | 0.08966 | 0.412 | 0.17005 | 0.03738 | 0.07848 | 0.1571  | 0.412 | 0.18426 | 0.13846 | 0.27069 | 0.29886 |
| 0.416 | 0.02466 | 0.12018 | 0.08889 | 0.416 | 0.16644 | 0.03711 | 0.07715 | 0.15645 | 0.416 | 0.1849  | 0.13875 | 0.26996 | 0.29849 |
| 0.42  | 0.02449 | 0.11728 | 0.0887  | 0.42  | 0.16343 | 0.03708 | 0.0762  | 0.15621 | 0.42  | 0.18553 | 0.13903 | 0.26996 | 0.29886 |
| 0.424 | 0.02456 | 0.11506 | 0.08908 | 0.424 | 0.16132 | 0.03724 | 0.07601 | 0.15618 | 0.424 | 0.18681 | 0.1396  | 0.26996 | 0.29923 |
| 0.428 | 0.02463 | 0.11318 | 0.08947 | 0.428 | 0.15952 | 0.03754 | 0.07544 | 0.1564  | 0.428 | 0.18808 | 0.14039 | 0.26996 | 0.29996 |
| 0.432 | 0.0248  | 0.1113  | 0.08986 | 0.432 | 0.15801 | 0.03805 | 0.07544 | 0.15683 | 0.432 | 0.18903 | 0.14105 | 0.27033 | 0.3007  |
| 0.436 | 0.02501 | 0.10976 | 0.09063 | 0.436 | 0.15681 | 0.03842 | 0.07563 | 0.1574  | 0.436 | 0.19031 | 0.14156 | 0.27069 | 0.30144 |
| 0.44  | 0.02537 | 0.1084  | 0.09121 | 0.44  | 0.15621 | 0.03901 | 0.07582 | 0.15816 | 0.44  | 0.19158 | 0.14222 | 0.27105 | 0.30217 |
| 0.444 | 0.02593 | 0.10737 | 0.09217 | 0.444 | 0.1556  | 0.03963 | 0.0762  | 0.159   | 0.444 | 0.19286 | 0.14326 | 0.27177 | 0.30328 |
| 0.448 | 0.02645 | 0.10635 | 0.09295 | 0.448 | 0.1553  | 0.04025 | 0.07696 | 0.16003 | 0.448 | 0.19413 | 0.14399 | 0.27285 | 0.30401 |
| 0.452 | 0.02698 | 0.10567 | 0.09372 | 0.452 | 0.155   | 0.04095 | 0.07753 | 0.16117 | 0.452 | 0.19508 | 0.14484 | 0.27357 | 0.30475 |
| 0.456 | 0.02775 | 0.10516 | 0.09468 | 0.456 | 0.1553  | 0.04159 | 0.07848 | 0.16252 | 0.456 | 0.19636 | 0.14592 | 0.2743  | 0.30548 |
| 0.46  | 0.02842 | 0.10464 | 0.09565 | 0.46  | 0.1553  | 0.04232 | 0.07924 | 0.16402 | 0.46  | 0.19763 | 0.14683 | 0.27538 | 0.30622 |
| 0.464 | 0.02926 | 0.10413 | 0.09662 | 0.464 | 0.1556  | 0.0431  | 0.08019 | 0.16548 | 0.464 | 0.19859 | 0.14781 | 0.27646 | 0.30696 |
| 0.468 | 0.03007 | 0.10396 | 0.09758 | 0.468 | 0.15621 | 0.04374 | 0.08151 | 0.16705 | 0.468 | 0.19986 | 0.14895 | 0.2779  | 0.30769 |
| 0.472 | 0.03094 | 0.10379 | 0.09855 | 0.472 | 0.15681 | 0.04463 | 0.08265 | 0.16873 | 0.472 | 0.20082 | 0.14999 | 0.27899 | 0.30843 |
| 0.476 | 0.032   | 0.10362 | 0.09951 | 0.476 | 0.15741 | 0.04533 | 0.0836  | 0.17066 | 0.476 | 0.20209 | 0.15116 | 0.28007 | 0.30916 |
| 0.48  | 0.03301 | 0.10362 | 0.10048 | 0.48  | 0.15831 | 0.0463  | 0.08474 | 0.17255 | 0.48  | 0.20336 | 0.15227 | 0.28151 | 0.3099  |
| 0.484 | 0.03417 | 0.10345 | 0.10144 | 0.484 | 0.15892 | 0.04697 | 0.08587 | 0.17448 | 0.484 | 0.20432 | 0.15325 | 0.28296 | 0.31064 |
| 0.488 | 0.03529 | 0.10362 | 0.10222 | 0.488 | 0.16012 | 0.04777 | 0.08739 | 0.17654 | 0.488 | 0.20559 | 0.15464 | 0.2844  | 0.31137 |
| 0.492 | 0.03656 | 0.10379 | 0.10338 | 0.492 | 0.16102 | 0.04871 | 0.08853 | 0.1787  | 0.492 | 0.20655 | 0.15603 | 0.28584 | 0.31211 |
| 0.496 | 0.03782 | 0.10413 | 0.10454 | 0.496 | 0.16223 | 0.04974 | 0.09005 | 0.18095 | 0.496 | 0.20782 | 0.15742 | 0.28765 | 0.31321 |
| 0.5   | 0.03933 | 0.1043  | 0.10569 | 0.5   | 0.16343 | 0.05065 | 0.09137 | 0.18326 | 0.5   | 0.20909 | 0.15881 | 0.28909 | 0.31395 |
| 0.504 | 0.04077 | 0.10481 | 0.10705 | 0.504 | 0.16494 | 0.05162 | 0.09289 | 0.18553 | 0.504 | 0.21037 | 0.16001 | 0.29053 | 0.31505 |
| 0.508 | 0.04245 | 0.1055  | 0.10859 | 0.508 | 0.16614 | 0.05277 | 0.0946  | 0.18814 | 0.508 | 0.21164 | 0.16159 | 0.29234 | 0.31616 |
| 0.512 | 0.0441  | 0.10601 | 0.10994 | 0.512 | 0.16825 | 0.05393 | 0.09631 | 0.19063 | 0.512 | 0.21323 | 0.16317 | 0.2945  | 0.31763 |
| 0.516 | 0.04589 | 0.10652 | 0.1113  | 0.516 | 0.16945 | 0.05527 | 0.09782 | 0.19318 | 0.516 | 0.21451 | 0.16474 | 0.29595 | 0.31837 |
| 0.52  | 0.04782 | 0.10737 | 0.11303 | 0.52  | 0.17126 | 0.05661 | 0.09972 | 0.1958  | 0.52  | 0.2161  | 0.16632 | 0.29811 | 0.31984 |
| 0.524 | 0.05003 | 0.10823 | 0.11477 | 0.524 | 0.17276 | 0.05823 | 0.10143 | 0.19862 | 0.524 | 0.21737 | 0.1679  | 0.29992 | 0.32094 |
| 0.528 | 0.05224 | 0.10925 | 0.1167  | 0.528 | 0.17517 | 0.06011 | 0.10313 | 0.20133 | 0.528 | 0.21896 | 0.1698  | 0.30208 | 0.32278 |
| 0.532 | 0.05466 | 0.11028 | 0.11844 | 0.532 | 0.17698 | 0.06172 | 0.10503 | 0.20431 | 0.532 | 0.22056 | 0.17138 | 0.30461 | 0.32425 |
| 0.536 | 0.05726 | 0.11147 | 0.12057 | 0.536 | 0.17939 | 0.0636  | 0.10712 | 0.2073  | 0.536 | 0.22215 | 0.17359 | 0.30641 | 0.32609 |
| 0.54  | 0.05996 | 0.11301 | 0.12308 | 0.54  | 0.18179 | 0.06575 | 0.1092  | 0.21028 | 0.54  | 0.22406 | 0.1758  | 0.30894 | 0.3283  |
| 0.544 | 0.06291 | 0.11454 | 0.12559 | 0.544 | 0.1845  | 0.0679  | 0.11129 | 0.21353 | 0.544 | 0.22597 | 0.1777  | 0.31183 | 0.33088 |
| 0.548 | 0.06592 | 0.11642 | 0.1281  | 0.548 | 0.18721 | 0.07032 | 0.11318 | 0.21705 | 0.548 | 0.2282  | 0.18022 | 0.31435 | 0.33309 |
| 0.552 | 0.06898 | 0.1183  | 0.131   | 0.552 | 0.19022 | 0.073   | 0.11565 |         |       |         |         |         |         |

|       |         |         |         |       |         |         |         |         |       |         |         |         |         |
|-------|---------|---------|---------|-------|---------|---------|---------|---------|-------|---------|---------|---------|---------|
| 0.664 | 0.19307 | 0.27057 | 0.30387 | 0.664 | 0.39372 | 0.23073 | 0.20005 | 0.4344  | 0.664 | 0.40873 | 0.36219 | 0.48793 | 0.55282 |
| 0.668 | 0.19728 | 0.27774 | 0.31082 | 0.668 | 0.40305 | 0.2361  | 0.2027  | 0.44307 | 0.668 | 0.41701 | 0.37008 | 0.49515 | 0.56238 |
| 0.672 | 0.20149 | 0.28508 | 0.31797 | 0.672 | 0.41208 | 0.24121 | 0.20592 | 0.45202 | 0.672 | 0.42497 | 0.37798 | 0.50272 | 0.57232 |
| 0.676 | 0.20535 | 0.29208 | 0.32415 | 0.676 | 0.42021 | 0.24577 | 0.20839 | 0.45988 | 0.676 | 0.43261 | 0.38588 | 0.50958 | 0.58079 |
| 0.68  | 0.20921 | 0.29908 | 0.33053 | 0.68  | 0.42864 | 0.25007 | 0.21142 | 0.46801 | 0.68  | 0.43993 | 0.39283 | 0.51644 | 0.58962 |
| 0.684 | 0.21307 | 0.30574 | 0.33671 | 0.684 | 0.43647 | 0.2541  | 0.21408 | 0.4756  | 0.684 | 0.44726 | 0.40009 | 0.52329 | 0.59809 |
| 0.688 | 0.21657 | 0.31222 | 0.34231 | 0.688 | 0.44369 | 0.25787 | 0.21692 | 0.48291 | 0.688 | 0.45426 | 0.40736 | 0.52943 | 0.60582 |
| 0.692 | 0.21973 | 0.31871 | 0.34752 | 0.692 | 0.45092 | 0.26109 | 0.21939 | 0.48996 | 0.692 | 0.46063 | 0.41336 | 0.53556 | 0.61318 |
| 0.696 | 0.22324 | 0.32468 | 0.35235 | 0.696 | 0.45784 | 0.26405 | 0.22205 | 0.49646 | 0.696 | 0.46732 | 0.41968 | 0.5417  | 0.62017 |
| 0.7   | 0.22675 | 0.33066 | 0.35737 | 0.7   | 0.46416 | 0.267   | 0.22489 | 0.50297 | 0.7   | 0.47305 | 0.42568 | 0.54711 | 0.62643 |
| 0.704 | 0.22991 | 0.33646 | 0.36182 | 0.704 | 0.47018 | 0.26942 | 0.22755 | 0.5092  | 0.704 | 0.4791  | 0.43169 | 0.55289 | 0.63268 |
| 0.708 | 0.23306 | 0.34158 | 0.36607 | 0.708 | 0.4756  | 0.2713  | 0.23001 | 0.51516 | 0.708 | 0.48419 | 0.43737 | 0.55758 | 0.63784 |
| 0.712 | 0.23622 | 0.34705 | 0.37012 | 0.712 | 0.48132 | 0.27372 | 0.23286 | 0.52085 | 0.712 | 0.4896  | 0.44274 | 0.56263 | 0.64336 |
| 0.716 | 0.23938 | 0.35217 | 0.37418 | 0.716 | 0.48674 | 0.2756  | 0.23551 | 0.52627 | 0.716 | 0.49502 | 0.44811 | 0.56732 | 0.64777 |
| 0.72  | 0.24254 | 0.35695 | 0.37785 | 0.72  | 0.49156 | 0.27748 | 0.23836 | 0.53142 | 0.72  | 0.49947 | 0.45317 | 0.57165 | 0.65219 |
| 0.724 | 0.24604 | 0.36139 | 0.38133 | 0.724 | 0.49607 | 0.27882 | 0.24101 | 0.5363  | 0.724 | 0.50425 | 0.45791 | 0.57598 | 0.65624 |
| 0.728 | 0.24885 | 0.36617 | 0.3848  | 0.728 | 0.50059 | 0.28071 | 0.24367 | 0.54118 | 0.728 | 0.50871 | 0.46264 | 0.57995 | 0.65992 |
| 0.732 | 0.25236 | 0.3706  | 0.38867 | 0.732 | 0.5048  | 0.28259 | 0.24651 | 0.54579 | 0.732 | 0.51317 | 0.46738 | 0.58392 | 0.66323 |
| 0.736 | 0.25587 | 0.37504 | 0.39234 | 0.736 | 0.50962 | 0.28447 | 0.24973 | 0.55067 | 0.736 | 0.51762 | 0.47212 | 0.58789 | 0.66654 |
| 0.74  | 0.25973 | 0.37914 | 0.39581 | 0.74  | 0.51323 | 0.28608 | 0.25258 | 0.555   | 0.74  | 0.52144 | 0.47623 | 0.59114 | 0.66912 |
| 0.744 | 0.26359 | 0.38358 | 0.39968 | 0.744 | 0.51775 | 0.28823 | 0.2558  | 0.55934 | 0.744 | 0.5259  | 0.48097 | 0.59475 | 0.6717  |
| 0.748 | 0.2678  | 0.38802 | 0.40354 | 0.748 | 0.52196 | 0.29065 | 0.25922 | 0.56394 | 0.748 | 0.53004 | 0.48571 | 0.59835 | 0.67464 |
| 0.752 | 0.27201 | 0.39263 | 0.40759 | 0.752 | 0.52648 | 0.29306 | 0.26244 | 0.56828 | 0.752 | 0.53418 | 0.49044 | 0.60196 | 0.67722 |
| 0.756 | 0.27622 | 0.39706 | 0.41184 | 0.756 | 0.53069 | 0.29548 | 0.26623 | 0.57262 | 0.756 | 0.538   | 0.49487 | 0.60521 | 0.67943 |
| 0.76  | 0.28113 | 0.40167 | 0.41609 | 0.76  | 0.53521 | 0.29817 | 0.26946 | 0.57695 | 0.76  | 0.54246 | 0.49929 | 0.60846 | 0.682   |
| 0.764 | 0.28604 | 0.40662 | 0.42092 | 0.764 | 0.53972 | 0.30139 | 0.27344 | 0.58156 | 0.764 | 0.54692 | 0.50403 | 0.61207 | 0.68458 |
| 0.768 | 0.29095 | 0.4114  | 0.42594 | 0.768 | 0.54454 | 0.30489 | 0.27761 | 0.5859  | 0.768 | 0.55137 | 0.50877 | 0.61568 | 0.68715 |
| 0.772 | 0.29586 | 0.41635 | 0.43077 | 0.772 | 0.54905 | 0.30838 | 0.28179 | 0.58996 | 0.772 | 0.55519 | 0.5135  | 0.61856 | 0.689   |
| 0.776 | 0.30218 | 0.42233 | 0.43715 | 0.776 | 0.55507 | 0.31295 | 0.28653 | 0.59565 | 0.776 | 0.56061 | 0.51919 | 0.62289 | 0.69268 |
| 0.78  | 0.30744 | 0.42762 | 0.44275 | 0.78  | 0.56049 | 0.31698 | 0.29108 | 0.59999 | 0.78  | 0.56507 | 0.52393 | 0.6265  | 0.69562 |
| 0.784 | 0.31305 | 0.43342 | 0.44854 | 0.784 | 0.56591 | 0.32128 | 0.29544 | 0.60433 | 0.784 | 0.56984 | 0.52898 | 0.62975 | 0.69783 |
| 0.788 | 0.31832 | 0.43889 | 0.45434 | 0.788 | 0.57133 | 0.32611 | 0.29999 | 0.60866 | 0.788 | 0.57398 | 0.53372 | 0.63336 | 0.7004  |
| 0.792 | 0.32358 | 0.44486 | 0.46052 | 0.792 | 0.57705 | 0.33095 | 0.30492 | 0.61273 | 0.792 | 0.57876 | 0.53846 | 0.63661 | 0.70298 |
| 0.796 | 0.32884 | 0.45118 | 0.4667  | 0.796 | 0.58307 | 0.33606 | 0.30966 | 0.61679 | 0.796 | 0.58321 | 0.5432  | 0.63985 | 0.70556 |
| 0.8   | 0.3334  | 0.45749 | 0.47307 | 0.8   | 0.58909 | 0.34116 | 0.31441 | 0.62086 | 0.8   | 0.58767 | 0.54825 | 0.6431  | 0.7085  |
| 0.804 | 0.33761 | 0.46347 | 0.47926 | 0.804 | 0.59511 | 0.346   | 0.31877 | 0.62438 | 0.804 | 0.59181 | 0.55236 | 0.64563 | 0.71071 |
| 0.808 | 0.34182 | 0.47013 | 0.48563 | 0.808 | 0.60113 | 0.3511  | 0.32313 | 0.62763 | 0.808 | 0.59595 | 0.55678 | 0.64852 | 0.71329 |
| 0.812 | 0.34568 | 0.4761  | 0.49181 | 0.812 | 0.60715 | 0.35594 | 0.32749 | 0.63061 | 0.812 | 0.59977 | 0.56089 | 0.65068 | 0.7155  |
| 0.816 | 0.34849 | 0.48225 | 0.49741 | 0.816 | 0.61287 | 0.36104 | 0.33147 | 0.63332 | 0.816 | 0.60327 | 0.56468 | 0.65285 | 0.71734 |
| 0.82  | 0.35095 | 0.48822 | 0.50301 | 0.82  | 0.61829 | 0.36534 | 0.33489 | 0.63522 | 0.82  | 0.60614 | 0.56816 | 0.65429 | 0.71881 |
| 0.824 | 0.3527  | 0.49334 | 0.50765 | 0.824 | 0.62311 | 0.36937 | 0.33773 | 0.63658 | 0.824 | 0.60837 | 0.57037 | 0.65537 | 0.71918 |
| 0.828 | 0.3541  | 0.49915 | 0.51248 | 0.828 | 0.62822 | 0.3734  | 0.34058 | 0.63766 | 0.828 | 0.6106  | 0.57321 | 0.65609 | 0.72028 |
| 0.832 | 0.35516 | 0.50444 | 0.51673 | 0.832 | 0.63304 | 0.37717 | 0.34285 | 0.63847 | 0.832 | 0.61251 | 0.57542 | 0.65681 | 0.72102 |
| 0.836 | 0.35551 | 0.50905 | 0.5202  | 0.836 | 0.63695 | 0.38012 | 0.34456 | 0.6382  | 0.836 | 0.61378 | 0.57669 | 0.65645 | 0.72065 |
| 0.84  | 0.35586 | 0.51349 | 0.52329 | 0.84  | 0.64057 | 0.38308 | 0.34589 | 0.6382  | 0.84  | 0.61474 | 0.57795 | 0.65609 | 0.72028 |
| 0.844 | 0.35551 | 0.51724 | 0.52581 | 0.844 | 0.64358 | 0.38523 | 0.34684 | 0.63739 | 0.844 | 0.61505 | 0.57858 | 0.65501 | 0.71918 |
| 0.848 | 0.3548  | 0.52083 | 0.52793 | 0.848 | 0.64629 | 0.38684 | 0.34741 | 0.6363  | 0.848 | 0.61474 | 0.57985 | 0.65357 | 0.7177  |
| 0.852 | 0.35375 | 0.52339 | 0.5289  | 0.852 | 0.64809 | 0.38791 | 0.34741 | 0.63414 | 0.852 | 0.6141  | 0.57921 | 0.65176 | 0.7155  |
| 0.856 | 0.3527  | 0.52561 | 0.52967 | 0.856 | 0.649   | 0.38845 | 0.34722 | 0.63197 | 0.856 | 0.61283 | 0.57858 | 0.6496  | 0.71329 |
| 0.86  | 0.3513  | 0.52731 | 0.52986 | 0.86  | 0.6499  | 0.38872 | 0.34627 | 0.62953 | 0.86  | 0.61187 | 0.57763 | 0.64743 | 0.71034 |
| 0.864 | 0.35024 | 0.52851 | 0.52967 | 0.864 | 0.6499  | 0.38872 | 0.34513 | 0.62682 | 0.864 | 0.61028 | 0.57637 | 0.64491 | 0.7074  |
| 0.868 | 0.34849 | 0.52902 | 0.5287  | 0.868 | 0.6493  | 0.38765 | 0.34361 | 0.62357 | 0.868 | 0.60773 | 0.57479 | 0.64166 | 0.70372 |
| 0.872 | 0.34709 | 0.52919 | 0.52754 | 0.872 | 0.64809 | 0.38711 | 0.3421  | 0.62031 | 0.872 | 0.6055  | 0.5729  | 0.63877 | 0.70004 |
| 0.876 | 0.34603 | 0.52902 | 0.52658 | 0.876 | 0.64689 | 0.38576 | 0.34039 | 0.61706 | 0.876 | 0.60359 | 0.57068 | 0.63625 | 0.69636 |
| 0.88  | 0.34463 | 0.52868 | 0.52465 | 0.88  | 0.64478 | 0.38415 | 0.33849 | 0.61354 | 0.88  | 0.60073 | 0.56847 | 0.633   | 0.69231 |
| 0.884 | 0.34323 | 0.52731 | 0.52233 | 0.884 | 0.64207 | 0.38254 | 0.33622 | 0.60975 | 0.884 | 0.59818 | 0.56563 | 0.62939 | 0.68789 |
| 0.888 | 0.34217 | 0.52595 | 0.52001 | 0.888 | 0.63906 | 0.38039 | 0.33413 | 0.60595 | 0.888 | 0.59499 | 0.5631  | 0.62578 | 0.68347 |
| 0.892 | 0.34112 | 0.52424 | 0.51769 | 0.892 | 0.63605 | 0.37824 | 0.33204 | 0.60216 | 0.892 | 0.59245 | 0.56057 | 0.62253 | 0.67906 |
| 0.896 | 0.34042 | 0.52253 | 0.51518 | 0.896 | 0.63274 | 0.37636 | 0.32996 | 0.59836 | 0.896 | 0.58958 | 0.55773 | 0.61928 | 0.67427 |
| 0.9   | 0.33972 | 0.52014 | 0.51209 | 0.9   | 0.62883 | 0.37394 | 0.32768 | 0.5943  | 0.9   | 0.58608 | 0.55489 | 0.61568 | 0.66949 |
| 0.904 | 0.33902 | 0.51827 | 0.50958 | 0.904 | 0.62491 | 0.37179 | 0.32541 | 0.59077 | 0.904 | 0.58321 | 0.55205 | 0.61243 | 0.66544 |
| 0.908 | 0.33867 | 0.51571 | 0.50707 | 0.908 | 0.621   | 0.36964 | 0.3237  | 0.58698 | 0.908 | 0.58035 | 0.5492  | 0.60918 | 0.66102 |
| 0.912 | 0.33832 | 0.51349 | 0.50456 | 0.912 | 0.61709 | 0.36749 | 0.3218  | 0.58346 | 0.912 | 0.57748 | 0.54604 | 0.60593 | 0.65661 |
| 0.916 | 0.33796 | 0.51058 | 0.50185 | 0.916 | 0.61287 | 0.36561 | 0.3201  | 0.57993 | 0.916 | 0.57462 | 0.54352 | 0.60305 | 0.65256 |
| 0.92  | 0.33796 | 0.50854 | 0.49934 | 0.92  | 0.60836 | 0.36346 | 0.3182  | 0.57668 | 0.92  | 0.57175 | 0.54067 | 0.5998  | 0.64814 |
| 0.924 | 0.33796 | 0.50632 | 0.49703 | 0.924 | 0.60444 | 0.36158 | 0.31706 | 0.57343 | 0.924 | 0.56889 | 0.53815 | 0.59727 | 0.64409 |
| 0.928 | 0.33832 | 0.50358 | 0.4949  | 0.928 | 0.60053 | 0.3597  | 0.31535 | 0.57018 | 0.928 | 0.56634 | 0.53562 | 0.59438 | 0.64041 |
| 0.932 | 0.33832 | 0.50119 | 0.49278 | 0.932 | 0.59601 | 0.35782 | 0.31403 | 0.56693 | 0.932 | 0.56379 | 0.53278 | 0.5915  | 0.63636 |
| 0.936 | 0.33902 | 0.49881 | 0.49084 | 0.936 | 0.5924  | 0.35621 | 0.31308 | 0.56394 | 0.936 | 0.56156 | 0.53025 | 0.58897 | 0.63268 |
| 0.94  | 0.33972 | 0.49676 | 0.4893  | 0.94  | 0.58849 | 0.35513 | 0.31213 | 0.56096 | 0.94  | 0.55933 | 0.52835 | 0.58681 | 0.62937 |
| 0.944 | 0.34042 | 0.49505 | 0.48756 | 0.944 | 0.58488 | 0.35379 | 0.31137 | 0.55825 | 0.944 | 0.55742 | 0.52614 | 0.58428 | 0.62606 |
| 0.948 | 0.34112 | 0.49317 | 0.48582 | 0.948 | 0.58126 | 0.35298 | 0.3108  | 0.55554 | 0.948 | 0.55519 | 0.52393 | 0.58212 | 0.62275 |
| 0.952 | 0.34182 | 0.49164 | 0.48447 | 0.952 | 0.57765 | 0.35191 | 0.31042 | 0.5531  | 0.952 | 0.55328 | 0.52203 | 0.57995 | 0.62017 |
| 0.956 | 0.34323 | 0.48942 | 0.4835  | 0.956 | 0.57464 | 0.3511  | 0.31061 | 0.55067 | 0.956 | 0.55201 | 0.52014 | 0.57815 | 0.61759 |
| 0.96  | 0.34428 | 0.48822 | 0.48254 | 0.96  | 0.57163 | 0.35057 | 0.31061 | 0.5485  | 0.96  | 0.55042 | 0.51856 | 0.5767  | 0.61502 |
| 0.964 | 0.34533 | 0.48668 | 0.48157 | 0.964 |         |         |         |         |       |         |         |         |         |

|       |         |         |         |       |         |         |         |         |       |         |         |         |         |
|-------|---------|---------|---------|-------|---------|---------|---------|---------|-------|---------|---------|---------|---------|
| 1.076 | 0.4141  | 0.5099  | 0.52329 | 1.076 | 0.56531 | 0.40807 | 0.37984 | 0.53711 | 1.076 | 0.57462 | 0.54162 | 0.58933 | 0.60986 |
| 1.08  | 0.41796 | 0.5128  | 0.52677 | 1.08  | 0.56772 | 0.41237 | 0.38439 | 0.53847 | 1.08  | 0.57748 | 0.54478 | 0.59186 | 0.61134 |
| 1.084 | 0.42217 | 0.51639 | 0.53102 | 1.084 | 0.57073 | 0.4172  | 0.38913 | 0.54064 | 1.084 | 0.58099 | 0.54794 | 0.59511 | 0.61354 |
| 1.088 | 0.42708 | 0.51997 | 0.53488 | 1.088 | 0.57374 | 0.42231 | 0.39406 | 0.54226 | 1.088 | 0.58417 | 0.55141 | 0.59799 | 0.61575 |
| 1.092 | 0.43129 | 0.52287 | 0.53855 | 1.092 | 0.57645 | 0.42714 | 0.3988  | 0.54389 | 1.092 | 0.58703 | 0.55489 | 0.60052 | 0.61759 |
| 1.096 | 0.4362  | 0.5268  | 0.543   | 1.096 | 0.57976 | 0.43198 | 0.40411 | 0.54606 | 1.096 | 0.59054 | 0.55868 | 0.60413 | 0.62017 |
| 1.1   | 0.44111 | 0.53056 | 0.54744 | 1.1   | 0.58337 | 0.43762 | 0.40961 | 0.54796 | 1.1   | 0.59436 | 0.56279 | 0.60738 | 0.62275 |
| 1.104 | 0.44602 | 0.53465 | 0.55207 | 1.104 | 0.58668 | 0.443   | 0.41492 | 0.55039 | 1.104 | 0.59786 | 0.56658 | 0.61098 | 0.62532 |
| 1.108 | 0.45093 | 0.53875 | 0.55652 | 1.108 | 0.5906  | 0.44864 | 0.42061 | 0.55256 | 1.108 | 0.60168 | 0.57068 | 0.61423 | 0.62753 |
| 1.112 | 0.45655 | 0.54302 | 0.56115 | 1.112 | 0.59451 | 0.45428 | 0.42649 | 0.555   | 1.112 | 0.60582 | 0.57511 | 0.6182  | 0.63047 |
| 1.116 | 0.46216 | 0.5478  | 0.56617 | 1.116 | 0.59902 | 0.46046 | 0.43275 | 0.55771 | 1.116 | 0.60996 | 0.58016 | 0.62217 | 0.63342 |
| 1.12  | 0.46813 | 0.55258 | 0.57158 | 1.12  | 0.60324 | 0.46691 | 0.4392  | 0.56042 | 1.12  | 0.61442 | 0.5849  | 0.62614 | 0.63673 |
| 1.124 | 0.47374 | 0.5577  | 0.5768  | 1.124 | 0.60775 | 0.47309 | 0.44565 | 0.56313 | 1.124 | 0.61856 | 0.58964 | 0.63011 | 0.63968 |
| 1.128 | 0.48005 | 0.56282 | 0.58221 | 1.128 | 0.61287 | 0.47954 | 0.45209 | 0.56638 | 1.128 | 0.62365 | 0.59501 | 0.63444 | 0.64336 |
| 1.132 | 0.48637 | 0.56811 | 0.58819 | 1.132 | 0.61769 | 0.48626 | 0.45873 | 0.56964 | 1.132 | 0.62875 | 0.60038 | 0.63913 | 0.64704 |
| 1.136 | 0.49304 | 0.57357 | 0.59399 | 1.136 | 0.62281 | 0.49324 | 0.46575 | 0.57289 | 1.136 | 0.63384 | 0.60607 | 0.64382 | 0.65072 |
| 1.14  | 0.4997  | 0.57887 | 0.59998 | 1.14  | 0.62822 | 0.50023 | 0.47277 | 0.57641 | 1.14  | 0.63862 | 0.61144 | 0.64852 | 0.6544  |
| 1.144 | 0.50672 | 0.58467 | 0.60616 | 1.144 | 0.63394 | 0.50748 | 0.47997 | 0.58021 | 1.144 | 0.64403 | 0.61744 | 0.65357 | 0.65845 |
| 1.148 | 0.51374 | 0.59116 | 0.61273 | 1.148 | 0.64027 | 0.51528 | 0.48794 | 0.584   | 1.148 | 0.64976 | 0.62344 | 0.65934 | 0.66286 |
| 1.152 | 0.52145 | 0.59799 | 0.61929 | 1.152 | 0.64659 | 0.52307 | 0.4959  | 0.58806 | 1.152 | 0.65549 | 0.62976 | 0.66475 | 0.66728 |
| 1.156 | 0.52882 | 0.6043  | 0.62586 | 1.156 | 0.65261 | 0.53086 | 0.50406 | 0.59213 | 1.156 | 0.6609  | 0.63608 | 0.67053 | 0.67206 |
| 1.16  | 0.53689 | 0.6113  | 0.6332  | 1.16  | 0.65953 | 0.53946 | 0.5124  | 0.59647 | 1.16  | 0.66727 | 0.64334 | 0.67666 | 0.67722 |
| 1.164 | 0.54531 | 0.61796 | 0.64073 | 1.164 | 0.66646 | 0.54779 | 0.52132 | 0.6008  | 1.164 | 0.67364 | 0.64998 | 0.68244 | 0.68237 |
| 1.168 | 0.55373 | 0.62547 | 0.64807 | 1.168 | 0.67368 | 0.55665 | 0.53023 | 0.60541 | 1.168 | 0.68001 | 0.65693 | 0.68893 | 0.68789 |
| 1.172 | 0.5625  | 0.63298 | 0.65561 | 1.172 | 0.68091 | 0.56525 | 0.53933 | 0.61002 | 1.172 | 0.68669 | 0.66451 | 0.69507 | 0.69341 |
| 1.176 | 0.57127 | 0.64066 | 0.66333 | 1.176 | 0.68813 | 0.57439 | 0.54882 | 0.61462 | 1.176 | 0.69306 | 0.67209 | 0.70156 | 0.6993  |
| 1.18  | 0.58004 | 0.64971 | 0.67144 | 1.18  | 0.69596 | 0.58352 | 0.55906 | 0.61977 | 1.18  | 0.70039 | 0.67999 | 0.70878 | 0.70519 |
| 1.184 | 0.59022 | 0.65756 | 0.68052 | 1.184 | 0.70469 | 0.59373 | 0.56968 | 0.62574 | 1.184 | 0.70866 | 0.68883 | 0.71636 | 0.71255 |
| 1.188 | 0.59934 | 0.66559 | 0.68883 | 1.188 | 0.71281 | 0.60368 | 0.57973 | 0.63061 | 1.188 | 0.71567 | 0.69673 | 0.72285 | 0.71844 |
| 1.192 | 0.60881 | 0.67429 | 0.69752 | 1.192 | 0.72154 | 0.61389 | 0.59035 | 0.6363  | 1.192 | 0.72331 | 0.70526 | 0.73043 | 0.72506 |
| 1.196 | 0.61864 | 0.68334 | 0.70641 | 1.196 | 0.73027 | 0.6241  | 0.60135 | 0.642   | 1.196 | 0.73159 | 0.71379 | 0.73801 | 0.73169 |
| 1.2   | 0.62881 | 0.69273 | 0.71548 | 1.2   | 0.73931 | 0.63458 | 0.61235 | 0.64796 | 1.2   | 0.73923 | 0.72263 | 0.74595 | 0.73868 |
| 1.204 | 0.63899 | 0.70178 | 0.72437 | 1.204 | 0.74804 | 0.64505 | 0.62335 | 0.65338 | 1.204 | 0.74719 | 0.73148 | 0.75353 | 0.74568 |
| 1.208 | 0.64951 | 0.71082 | 0.73383 | 1.208 | 0.75707 | 0.65634 | 0.6353  | 0.65961 | 1.208 | 0.75547 | 0.74064 | 0.76183 | 0.75304 |
| 1.212 | 0.66074 | 0.72055 | 0.74349 | 1.212 | 0.7667  | 0.66789 | 0.64744 | 0.66612 | 1.212 | 0.76375 | 0.75012 | 0.77049 | 0.76077 |
| 1.216 | 0.67196 | 0.73045 | 0.75334 | 1.216 | 0.77603 | 0.67945 | 0.65976 | 0.67262 | 1.216 | 0.77234 | 0.7596  | 0.77915 | 0.76886 |
| 1.22  | 0.68249 | 0.74018 | 0.76261 | 1.22  | 0.78566 | 0.69127 | 0.67228 | 0.67885 | 1.22  | 0.78094 | 0.76939 | 0.78745 | 0.77659 |
| 1.224 | 0.69442 | 0.75009 | 0.77304 | 1.224 | 0.7956  | 0.70363 | 0.68518 | 0.6859  | 1.224 | 0.79049 | 0.7795  | 0.79647 | 0.78469 |
| 1.228 | 0.70565 | 0.76118 | 0.78328 | 1.228 | 0.80553 | 0.71653 | 0.69826 | 0.69267 | 1.228 | 0.79941 | 0.78961 | 0.80549 | 0.79315 |
| 1.232 | 0.71792 | 0.77177 | 0.7939  | 1.232 | 0.81577 | 0.72889 | 0.71173 | 0.69945 | 1.232 | 0.80896 | 0.79972 | 0.81451 | 0.80236 |
| 1.236 | 0.7295  | 0.78218 | 0.80414 | 1.236 | 0.8257  | 0.74152 | 0.72538 | 0.70595 | 1.236 | 0.81787 | 0.81014 | 0.82354 | 0.81082 |
| 1.24  | 0.74178 | 0.79379 | 0.81457 | 1.24  | 0.83594 | 0.75495 | 0.73923 | 0.713   | 1.24  | 0.82775 | 0.82057 | 0.83328 | 0.81929 |
| 1.244 | 0.75406 | 0.80522 | 0.82539 | 1.244 | 0.84617 | 0.76892 | 0.75364 | 0.72032 | 1.244 | 0.83793 | 0.83099 | 0.84338 | 0.82849 |
| 1.248 | 0.76704 | 0.81683 | 0.8362  | 1.248 | 0.85671 | 0.78316 | 0.76881 | 0.72763 | 1.248 | 0.84812 | 0.84236 | 0.85349 | 0.83806 |
| 1.252 | 0.78002 | 0.82827 | 0.84741 | 1.252 | 0.86694 | 0.79714 | 0.78418 | 0.73495 | 1.252 | 0.85831 | 0.85279 | 0.86323 | 0.84689 |
| 1.256 | 0.79336 | 0.84005 | 0.85919 | 1.256 | 0.87748 | 0.81165 | 0.79954 | 0.74254 | 1.256 | 0.8685  | 0.86448 | 0.8737  | 0.85646 |
| 1.26  | 0.80704 | 0.85268 | 0.87097 | 1.26  | 0.88802 | 0.82669 | 0.81585 | 0.7504  | 1.26  | 0.87964 | 0.87585 | 0.88452 | 0.8664  |
| 1.264 | 0.82037 | 0.86497 | 0.88295 | 1.264 | 0.89885 | 0.84228 | 0.83197 | 0.7588  | 1.264 | 0.89079 | 0.88722 | 0.89571 | 0.87597 |
| 1.268 | 0.83405 | 0.8776  | 0.89473 | 1.268 | 0.90969 | 0.85786 | 0.84885 | 0.76639 | 1.268 | 0.90193 | 0.89923 | 0.90617 | 0.8859  |
| 1.272 | 0.84809 | 0.89024 | 0.90709 | 1.272 | 0.92053 | 0.87371 | 0.86554 | 0.77452 | 1.272 | 0.91308 | 0.91091 | 0.91736 | 0.89621 |
| 1.276 | 0.86282 | 0.90355 | 0.91965 | 1.276 | 0.93136 | 0.89064 | 0.88317 | 0.78292 | 1.276 | 0.92454 | 0.92323 | 0.92855 | 0.90688 |
| 1.28  | 0.87756 | 0.91704 | 0.9322  | 1.28  | 0.9431  | 0.90784 | 0.90176 | 0.79159 | 1.28  | 0.93632 | 0.93556 | 0.93974 | 0.91792 |
| 1.284 | 0.89229 | 0.93018 | 0.94495 | 1.284 | 0.95364 | 0.92503 | 0.91978 | 0.79972 | 1.284 | 0.9481  | 0.94788 | 0.95092 | 0.92823 |
| 1.288 | 0.90843 | 0.94486 | 0.95866 | 1.288 | 0.96568 | 0.94384 | 0.9395  | 0.80921 | 1.288 | 0.96084 | 0.96114 | 0.96319 | 0.93964 |
| 1.292 | 0.92422 | 0.95954 | 0.97257 | 1.292 | 0.97742 | 0.96238 | 0.95904 | 0.81815 | 1.292 | 0.97357 | 0.9741  | 0.9751  | 0.95068 |
| 1.296 | 0.94071 | 0.97371 | 0.98609 | 1.296 | 0.98886 | 0.98119 | 0.97952 | 0.8271  | 1.296 | 0.98663 | 0.98705 | 0.98773 | 0.96172 |
| 1.3   | 0.95685 | 0.9889  | 1       | 1.3   | 1       | 1       | 1       | 0.83604 | 1.3   | 1       | 1       | 1       | 0.97276 |

--  
--  
--  
--  
--  
--  
--  
--  
--  
--  
--
